# Supplementary material for: Genome-wide association studies for soybean epicotyl length in two environments using 3VmrMLM
Source: Front Plant Sci. 2022 Nov 14;13:1033120. doi: 10.3389/fpls.2022.1033120 (PMC9704727; doi:10.3389/fpls.2022.1033120)
Supplement: Supplementary file 1 [file DataSheet_1.xlsx]

## Sheet: Table S1
Table S1 Variety Geographical Distribution
Serial No.	ID	Name	Speices	Type	Country	Province/State	Longitude	Latitude	Structure
1	16NF1_2	N32	G.max	Improved_cultivar	Eastern_Europe	NA	26.10E	44.23N	WDD_NR
2	16NF5_6	N17	G.max	Improved_cultivar	Eastern_Europe	NA	26.10E	44.23N	WDD_NR
3	16NF7_8	N07	G.max	Improved_cultivar	Eastern_Europe	NA	26.10E	44.23N	WDD_NR
4	16NF17_18	Fiskeby 1040-4-2	G.max	Improved_cultivar	Sweden	Ostergotland	15.51E	58.33N	WDD_NR
5	16NF23_24	PI 468903	G.max	Improved_cultivar	China	Jilin	125.18E	43.55N	NR
6	16NF27_28	Suzuhime	G.max	Improved_cultivar	Japan	NA	139.69E	35.69N	WDD_HR
7	16NF29_30	Proto	G.max	Improved_cultivar	United_States	Minnesota	122.28W	40.40N	WDD_HR
8	16NF31_32	TBD	G.max	Improved_cultivar	United_States	NA	74.25W	40.69N	WDD_HR
9	16NF33_34	Maple Arrow	G.max	Improved_cultivar	Canada	Ontario	93.71W	48.96N	WDD_NR
10	16NF35_36	Wilkin	G.max	Improved_cultivar	United_States	Minnesota	122.28W	40.40N	WDD_HR
11	16NF37_38	Pin-din-guan	G.max	Improved_cultivar	China	NA	116.28E	39.54N	NR
12	16NF45_46	T307	G.max	Improved_cultivar	United_States	NA	74.25W	40.69N	WDD_HR
13	16NF53_54	L72-920	G.max	Improved_cultivar	United_States	NA	74.25W	40.69N	WDD_HR
14	16NF55_56	9234	G.max	Improved_cultivar	United_States	NA	74.25W	40.69N	WDD_HR
15	16NF65_66	Kovean	G.max	Improved_cultivar	United_States	NA	74.25W	40.69N	WDD_HR
16	16NF67_68	SOER-3	G.max	Improved_cultivar	Russia	NA	37.35E	55.45N	WDD_NR
17	16NF69_70	Kirsches Stamm 2008	G.max	Improved_cultivar	Germany	NA	13.2E	52.31N	WDD_NR
18	16NF73_74	Dekabig	G.max	Improved_cultivar	Italy	NA	12E	42N	WDD_NR
19	16NF75_76	Soja 77180	G.max	Improved_cultivar	Germany	NA	13.2E	52.31N	WDD_NR
20	16NF79_80	MN1301	G.max	Improved_cultivar	United_States	NA	74.25W	40.69N	WDD_HR
21	16NF81_82	L84-2157	G.max	Improved_cultivar	United_States	NA	74.25W	40.69N	WDD_HR
22	16NF89_90	LS94-3207	G.max	Improved_cultivar	United_States	Illinois	98.46W	47.97N	WDD_HR
23	16NF95_96	Soja 277180	G.max	Improved_cultivar	Germany	NA	13.2E	52.31N	WDD_NR
24	16NF101_102	L88-8153	G.max	Improved_cultivar	United_States	NA	74.25W	40.69N	WDD_HR
25	16NF109_110	Dunn	G.max	Improved_cultivar	United_States	Wisconsin	94.05W	44.82N	WDD_HR
26	16NF113_114	S01-9391	G.max	Improved_cultivar	United_States	Missouri	96.92W	38.22N	WDD_HR
27	16NF117_118	Syella	G.max	Improved_cultivar	Italy	NA	12E	42N	WDD_NR
28	16NF121_122	T309	G.max	Improved_cultivar	United_States	NA	74.25W	40.69N	WDD_HR
29	16NF123_124	T308	G.max	Improved_cultivar	United_States	NA	74.25W	40.69N	WDD_HR
30	16NF137_138	T280	G.max	Improved_cultivar	United_States	NA	74.25W	40.69N	WDD_HR
31	16NF153_154	Epps	G.max	Improved_cultivar	United_States	Mississippi	92.12W	32.55N	WDD_HR
32	16NF155_156	PN9394	G.max	Improved_cultivar	United_States	NA	74.25W	40.69N	WDD_HR
33	16NF157_158	HP202	G.max	Improved_cultivar	United_States	Iowa	93.60W	41.59N	WDD_HR
34	16NF159_160	Cordell	G.max	Improved_cultivar	United_States	Mississippi	92.12W	32.55N	WDD_HR
35	16NF161_162	Walters	G.max	Improved_cultivar	United_States	Arkansas	91.34W	34.26N	WDD_HR
36	16NF165_166	PR 173-7	G.max	Improved_cultivar	United_States	NA	74.25W	40.69N	WDD_HR
37	16NF167_168	L65-756	G.max	Improved_cultivar	United_States	NA	74.25W	40.69N	WDD_HR
38	16NF169_170	Mack	G.max	Improved_cultivar	United_States	NA	74.25W	40.69N	WDD_HR
39	16NF171_172	PI189866	G.max	Landrace	United_States	NA	74.25W	40.69N	WDD_HR
40	16NF173_174	Asgrow A 1939	G.max	Improved_cultivar	United_States	NA	74.25W	40.69N	WDD_HR
41	16NF179_180	Conrad	G.max	Improved_cultivar	United_States	Iowa	93.60W	41.59N	WDD_HR
42	16NF181_182	Narow	G.max	Improved_cultivar	United_States	Arkansas	91.34W	34.26N	WDD_HR
43	16NF187_188	Camp	G.max	Improved_cultivar	United_States	Virginia	83.91W	37.92N	WDD_HR
44	16NF189_190	PR 165-50	G.max	Improved_cultivar	United_States	NA	74.25W	40.69N	WDD_HR
45	16NF193_194	M044-1	G.max	Improved_cultivar	United_States	NA	74.25W	40.69N	WDD_HR
46	16NF205_206	L73-105	G.max	Improved_cultivar	United_States	NA	74.25W	40.69N	WDD_HR
47	16NF207_208	Century	G.max	Improved_cultivar	United_States	Indiana	79.15W	40.61N	WDD_HR
48	16NF209_210	Amcor 89	G.max	Improved_cultivar	United_States	Ohio	84.91W	40.34N	WDD_HR
49	16NF211_212	PI196160	G.max	Landrace	Japan	NA	139.69E	35.69N	WDD_HR
50	16NF221_222	Manchu 2204	G.max	Improved_cultivar	United_States	NA	74.25W	40.69N	WDD_HR
51	16NF223_224	Cloud	G.max	Improved_cultivar	United_States	NA	74.25W	40.69N	WDD_HR
52	16NF229_230	Beeson	G.max	Improved_cultivar	United_States	Indiana	79.15W	40.61N	WDD_HR
53	16NF231_232	Provar	G.max	Improved_cultivar	United_States	Iowa	93.60W	41.59N	WDD_HR
54	16NF233_234	L83-4387（ti）	G.max	Improved_cultivar	United_States	NA	74.25W	40.69N	WDD_HR
55	16NF237_238	T279	G.max	Improved_cultivar	United_States	NA	74.25W	40.69N	WDD_HR
56	16NF239_240	Jack	G.max	Improved_cultivar	United_States	Illinois	98.46W	47.97N	WDD_HR
57	16NF243_244	Vinton 81	G.max	Improved_cultivar	United_States	Iowa	93.60W	41.59N	WDD_HR
58	16NF245_246	L67-153	G.max	Improved_cultivar	United_States	NA	74.25W	40.69N	WDD_HR
59	16NF251_252	Sharkey	G.max	Improved_cultivar	United_States	Mississippi	92.12W	32.55N	WDD_HR
60	16NF255_256	Twiggs	G.max	Improved_cultivar	United_States	Georgia	73.07W	44.44N	WDD_HR
61	16NF257_258	Century-lx1.3	G.max	Improved_cultivar	United_States	NA	74.25W	40.69N	WDD_HR
62	16NF261_262	Corsoy	G.max	Improved_cultivar	United_States	Iowa	93.60W	41.59N	WDD_HR
63	16NF263_264	Magnolid	G.max	Improved_cultivar	United_States	NA	74.25W	40.69N	WDD_HR
64	16NF267_268	L89-2435	G.max	Improved_cultivar	United_States	NA	74.25W	40.69N	WDD_HR
65	16NF271_272	Bryan	G.max	Improved_cultivar	United_States	Georgia	73.07W	44.44N	WDD_HR
66	16NF277_278	GR8836	G.max	Improved_cultivar	United_States	Ohio	84.91W	40.34N	WDD_HR
67	16NF281_282	A2396	G.max	Improved_cultivar	United_States	Missouri	96.92W	38.22N	WDD_HR
68	16NF285_286	Pickett	G.max	Improved_cultivar	United_States	North Carolina	84.35W	35.10N	WDD_HR
69	16NF287_288	Ohio	G.max	Improved_cultivar	United_States	NA	74.25W	40.69N	WDD_HR
70	16NF291_292	Harwood	G.max	Improved_cultivar	Canada	Ontario	93.71W	48.96N	WDD_NR
71	16NF293_294	C1640	G.max	Improved_cultivar	United_States	NA	74.25W	40.69N	WDD_HR
72	16NF299_300	Altona	G.max	Improved_cultivar	Canada	Manitoba	104.41W	54.16N	WDD_NR
73	16NF301_302	DorchsoyB	G.max	Improved_cultivar	United_States	NA	74.25W	40.69N	WDD_HR
74	16NF303_304	L63-2404	G.max	Improved_cultivar	United_States	NA	74.25W	40.69N	WDD_HR
75	16NF305_306	Tousan 83	G.max	Improved_cultivar	Japan	NA	139.69E	35.69N	WDD_HR
76	16NF307_308	M044	G.max	Improved_cultivar	United_States	NA	74.25W	40.69N	WDD_HR
77	16NF311_312	M045	G.max	Improved_cultivar	United_States	NA	74.25W	40.69N	WDD_HR
78	16NF313_314	Tousan kei NA5	G.max	Improved_cultivar	Japan	NA	139.69E	35.69N	WDD_HR
79	16NF317_318	Pharaoh	G.max	Improved_cultivar	United_States	Illinois	98.46W	47.97N	WDD_HR
80	16NF319_320	Soja 398180	G.max	Improved_cultivar	Germany	NA	13.2E	52.31N	WDD_NR
81	16NF325_326	AGS162	G.max	Improved_cultivar	Tailand	NA	100.31E	13.45N	WDD_SR
82	16NF327_328	Chustnut	G.max	Improved_cultivar	United_States	NA	74.25W	40.69N	WDD_HR
83	16NF329_330	Amsoy	G.max	Improved_cultivar	United_States	Iowa	93.60W	41.59N	WDD_HR
84	16NF335_336	PI82295	G.max	Landrace	South_Korea	Seoul	126.37E	37.28N	WDD_HR
85	16NF337_338	PI80828-1	G.max	Landrace	Japan	Fukushima	141.01E	37.25N	WDD_HR
86	16NF341_342	BRS 155	G.max	Improved_cultivar	Brazil	NA	47.56W	15.47S	WDD_SR
87	16NF343_344	BRS 156	G.max	Improved_cultivar	Brazil	NA	47.56W	15.47S	WDD_SR
88	16NF345_346	EMBRAPA 58	G.max	Improved_cultivar	Brazil	NA	47.56W	15.47S	WDD_SR
89	16NF347_348	BRS 132	G.max	Improved_cultivar	Brazil	NA	47.56W	15.47S	WDD_SR
90	16NF349_350	D96-1217	G.max	Improved_cultivar	United_States	Mississippi	92.12W	32.55N	WDD_HR
91	16NF351_352	Sargent	G.max	Improved_cultivar	United_States	North Dakota	100.46W	46.48N	WDD_HR
92	16NF355_356	S99-3181	G.max	Improved_cultivar	United_States	Missouri	96.92W	38.22N	WDD_HR
93	16NF359_360	L81-4590（ti）	G.max	Improved_cultivar	United_States	NA	74.25W	40.69N	WDD_HR
94	16NF361_362	Nile	G.max	Improved_cultivar	United_States	Illinois	98.46W	47.97N	WDD_HR
95	16NF363_364	L87-0482	G.max	Improved_cultivar	United_States	NA	74.25W	40.69N	WDD_HR
96	16NF377_378	L83-570	G.max	Improved_cultivar	United_States	NA	74.25W	40.69N	WDD_HR
97	16NF379_380	Bedford	G.max	Improved_cultivar	United_States	Tennessee	90.47W	35.75N	WDD_HR
98	16NF387_388	Hobbit	G.max	Improved_cultivar	United_States	Ohio	84.91W	40.34N	WDD_HR
99	16NF389_390	Prichard	G.max	Improved_cultivar	United_States	Georgia	73.07W	44.44N	WDD_HR
100	16NF391_392	Howard	G.max	Improved_cultivar	United_States	Florida	92.83W	27.32N	WDD_HR
101	16NF393_394	Gordon	G.max	Improved_cultivar	United_States	Georgia	73.07W	44.44N	WDD_HR
102	16NF395_396	T219H	G.max	Improved_cultivar	United_States	NA	74.25W	40.69N	WDD_HR
103	16NF397_398	Probst	G.max	Improved_cultivar	United_States	Indiana	79.15W	40.61N	WDD_HR
104	16NF399_400	Mercury	G.max	Improved_cultivar	United_States	Nebraska	104.17W	41.42N	WDD_HR
105	16NF401_402	Delsoy4900	G.max	Improved_cultivar	United_States	Missouri	96.92W	38.22N	WDD_HR
106	16NF403_404	L82-1858	G.max	Improved_cultivar	United_States	NA	74.25W	40.69N	WDD_HR
107	16NF407_408	L83-4744	G.max	Improved_cultivar	United_States	NA	74.25W	40.69N	WDD_HR
108	16NF411_412	CN 344	G.max	Improved_cultivar	United_States	NA	74.25W	40.69N	WDD_HR
109	16NF413_414	Thomas	G.max	Improved_cultivar	United_States	Georgia	73.07W	44.44N	WDD_HR
110	16NF415_416	Buckshot 723	G.max	Improved_cultivar	United_States	Louisiana	93.64W	30.92N	WDD_HR
111	16NF417_418	Gnome 85	G.max	Improved_cultivar	United_States	Ohio	84.91W	40.34N	WDD_HR
112	16NF421_422	L72-1879	G.max	Improved_cultivar	United_States	NA	74.25W	40.69N	WDD_HR
113	16NF423_424	Williams79	G.max	Improved_cultivar	United_States	Illinois	98.46W	47.97N	WDD_HR
114	16NF427_428	SRE-D-14A	G.max	Improved_cultivar	United_States	NA	74.25W	40.69N	WDD_HR
115	16NF431_432	Hobbit87	G.max	Improved_cultivar	United_States	Ohio	84.91W	40.34N	WDD_HR
116	16NF433_434	Williams	G.max	Improved_cultivar	United_States	Illinois	98.46W	47.97N	WDD_HR
117	16NF437_438	PI90763	G.max	Improved_cultivar	China	Beijing	116.28E	39.54N	NR
118	16NF439_440	Odell	G.max	Improved_cultivar	United_States	Nebraska	104.17W	41.42N	WDD_HR
119	16NF455_456	L65-763	G.max	Improved_cultivar	United_States	NA	74.25W	40.69N	WDD_HR
120	16NF465_466	Carlin	G.max	Improved_cultivar	United_States	Illinois	98.46W	47.97N	WDD_HR
121	16NF473_474	L85-1467	G.max	Improved_cultivar	United_States	NA	74.25W	40.69N	WDD_HR
122	16NF475_476	NiRiLiYa4Hao	G.max	Improved_cultivar	Nigeria	NA	0.37W	8.94N	WDD_SR
123	16NF481_482	Elf	G.max	Improved_cultivar	United_States	Illinois	98.46W	47.97N	WDD_HR
124	16NF483_484	Franklin	G.max	Improved_cultivar	United_States	Illinois	98.46W	47.97N	WDD_HR
125	16NF487_488	MT/BRS-63	G.max	Improved_cultivar	Brazil	NA	47.56W	15.47S	WDD_SR
126	16NF489_490	MQT/BR-45	G.max	Improved_cultivar	Brazil	NA	47.56W	15.47S	WDD_SR
127	16NF493_494	Sooty	G.max	Improved_cultivar	China	Zhejiang	120.10E	30.15N	SR
128	16NF495_496	Padre	G.max	Improved_cultivar	United_States	Texas	109.09W	30.87N	WDD_HR
129	16NF497_498	Bolivar	G.max	Improved_cultivar	United_States	Mississippi	92.12W	32.55N	WDD_HR
130	16NF499_500	Pyramid	G.max	Improved_cultivar	United_States	Illinois	98.46W	47.97N	WDD_HR
131	16NF503_504	T171	G.max	Improved_cultivar	United_States	NA	74.25W	40.69N	WDD_HR
132	16NF509_510	Wilson Five B	G.max	Improved_cultivar	United_States	NA	74.25W	40.69N	WDD_HR
133	16NF511_512	Wilson Five	G.max	Improved_cultivar	United_States	NA	74.25W	40.69N	WDD_HR
134	16NF517_518	T221	G.max	Improved_cultivar	United_States	NA	74.25W	40.69N	WDD_HR
135	16NF521_522	Accomac	G.max	Improved_cultivar	United_States	Virginia	83.91W	37.92N	WDD_HR
136	16NF523_524	D83-3349	G.max	Improved_cultivar	United_States	NA	74.25W	40.69N	WDD_HR
137	16NF525_526	PI157440	G.max	Landrace	South_Korea	Kyonggi	127.04E	37.3N	WDD_HR
138	16NF527_528	Chiquita	G.max	Improved_cultivar	United_States	NA	74.25W	40.69N	WDD_HR
139	16NF573_574	Yellow Morvel	G.max	Improved_cultivar	United_States	NA	74.25W	40.69N	WDD_HR
140	16NF645_646	LongHuang1Hao	G.max	Improved_cultivar	China	HeiLongJiang	126.64E	45.76N	NR
141	16NF1387_1388	HeiSheng101	G.max	Improved_cultivar	China	HeiLongJiang	126.64E	45.76N	NR
142	16NF1441_1442	Wei J127	G.max	Improved_cultivar	China	ShanDong	120.18E	36.03N	HR
143	16NF1709_1710	DongSheng1Hao	G.max	Improved_cultivar	China	HeiLongJiang	126.64E	45.76N	NR
144	16NF1717_1718	DongDa2Hao	G.max	Improved_cultivar	China	HeiLongJiang	126.64E	45.76N	NR
145	16NF2293_2294	HeDou2Hao(MN413)	G.max	Improved_cultivar	China	AnHui	117.17E	31.52N	HR
146	16NF2313_2314	ShanNing7Hao	G.max	Improved_cultivar	China	ShanDong	120.18E	36.03N	HR
147	16NF2315_2316	PuHai10Hao	G.max	Improved_cultivar	China	HeNan	113.40E	34.46N	HR
148	16NF2317_2318	PuDou206	G.max	Improved_cultivar	China	HeNan	113.40E	34.46N	HR
149	16NF2393_2394	HanDou5Hao	G.max	Improved_cultivar	China	HeBei	114.26E	38.03N	HR
150	16NF3455_3456	FuDou310	G.max	Improved_cultivar	China	FuJian	118.04E	24.26N	SR
151	16NF3467_3468	FuDou9765	G.max	Improved_cultivar	China	AnHui	117.17E	31.52N	HR
152	16NF3477_3478	ChuanDou4Hao	G.max	Improved_cultivar	China	SiChuan	104.06E	30.67N	SR
153	16NF3483_3484	NanDou12	G.max	Improved_cultivar	China	SiChuan	104.06E	30.67N	SR
154	16NF3503_3504	QuXian3Hao	G.max	Improved_cultivar	China	ZheJiang	120.10E	30.15N	SR
155	16NF3509_3510	QuanDou7Hao	G.max	Improved_cultivar	China	FuJian	118.04E	24.26N	SR
156	16NF3511_3512	HuaXia9Hao	G.max	Improved_cultivar	China	GuangDong	113.18E	23.10N	SR
157	16NF3517_3518	DianDou7Hao	G.max	Improved_cultivar	China	YunNan	102.42E	25.03N	SR
158	16NF4601	HuaiDou4Hao	G.max	Improved_cultivar	China	JiangSu	118.75E	32.04N	HR
159	16NF4605	ZaoSheng75	G.max	Improved_cultivar	China	ZheJiang	120.10E	30.15N	SR
160	16NF4698	Dp3480	G.max	Improved_cultivar	United_States	NA	74.25W	40.69N	WDD_HR
161	16NF425_426	Williams 82	G.max	Improved_cultivar	United_States	Illinois	98.46W	47.97N	WDD_HR
162	16NF19_20	KPS292(AGS292）	G.max	Improved_cultivar	Japan	NA	139.69E	35.69N	WDD_HR
163	16NF21_22	G.maxN136	G.max	Improved_cultivar	Russia	NA	37.35E	55.45N	WDD_NR
164	16NF25_26	OAC Bayfield	G.max	Improved_cultivar	Canada	NA	73.58W	45.20N	WDD_NR
165	16NF39_40	G.max-46	G.max	Improved_cultivar	Russia	NA	37.35E	55.45N	WDD_NR
166	16NF41_42	BC-14-1-3	G.max	Improved_cultivar	Canada	NA	73.58W	45.20N	WDD_NR
167	16NF47_48	Chohckuzan	G.max	Improved_cultivar	Japan	NA	139.69E	35.69N	WDD_HR
168	16NF49_50	CHI-LU-SCHU	G.max	Improved_cultivar	Russia	NA	37.35E	55.45N	WDD_NR
169	16NF57_58	Tsurukogane	G.max	Improved_cultivar	Japan	NA	139.69E	35.69N	WDD_HR
170	16NF61_62	Suzumaru	G.max	Improved_cultivar	Japan	NA	139.69E	35.69N	WDD_HR
171	16NF63_64	MONETA	G.max	Improved_cultivar	Russia	NA	37.35E	55.45N	WDD_NR
172	16NF83_84	DanLi	G.max	Improved_cultivar	Japan	NA	139.69E	35.69N	WDD_HR
173	16NF85_86	PSB543	G.max	Improved_cultivar	Russia	NA	37.35E	55.45N	WDD_NR
174	16NF87_88	Yumeyutaka	G.max	Improved_cultivar	Japan	NA	139.69E	35.69N	WDD_HR
175	16NF97_98	GuanDong102	G.max	Improved_cultivar	Japan	NA	139.69E	35.69N	WDD_HR
176	16NF99_100	ZhongTe1Hao	G.max	Improved_cultivar	Japan	NA	139.69E	35.69N	WDD_HR
177	16NF103_104	ДВ 2846	G.max	Improved_cultivar	Russia	NA	37.35E	55.45N	WDD_NR
178	16NF107_108	WuMing7	G.max	Improved_cultivar	Japan	NA	139.69E	35.69N	WDD_HR
179	16NF125_126	POLUKULTURNAYA-2	G.max	Improved_cultivar	Russia	NA	37.35E	55.45N	WDD_NR
180	16NF127_128	C∏1271	G.max	Improved_cultivar	Russia	NA	37.35E	55.45N	WDD_NR
181	16NF131_132	PSB313	G.max	Improved_cultivar	Russia	NA	37.35E	55.45N	WDD_NR
182	16NF133_134	PSB609	G.max	Improved_cultivar	Russia	NA	37.35E	55.45N	WDD_NR
183	16NF149_150	Suwon123	G.max	Improved_cultivar	South_Korea	NA	126.37E	37.28N	WDD_HR
184	16NF177_178	POLUKULTURNAYA-1	G.max	Improved_cultivar	Russia	NA	37.35E	55.45N	WDD_NR
185	16NF183_184	Japan Ⅰ	G.max	Improved_cultivar	Japan	NA	139.69E	35.69N	WDD_HR
186	16NF185_186	ブロ－バ	G.max	Improved_cultivar	Japan	NA	139.69E	35.69N	WDD_HR
187	16NF191_192	Suwon 193	G.max	Improved_cultivar	South_Korea	NA	126.37E	37.28N	WDD_HR
188	16NF219_220	PSB576	G.max	Improved_cultivar	Russia	NA	37.35E	55.45N	WDD_NR
189	16NF225_226	CA31	G.max	Improved_cultivar	Canada	NA	73.58W	45.20N	WDD_NR
190	16NF227_228	PSB575	G.max	Improved_cultivar	Russia	NA	37.35E	55.45N	WDD_NR
191	16NF249_250	CA5	G.max	Improved_cultivar	Canada	NA	73.58W	45.20N	WDD_NR
192	16NF273_274	カニゾチ	G.max	Improved_cultivar	Japan	NA	139.69E	35.69N	WDD_HR
193	16NF275_276	WuMing4	G.max	Improved_cultivar	Japan	NA	139.69E	35.69N	WDD_HR
194	16NF283_284	WuMing5	G.max	Improved_cultivar	Japan	NA	139.69E	35.69N	WDD_HR
195	16NF289_290	Tokachi nagaha	G.max	Improved_cultivar	Japan	NA	139.69E	35.69N	WDD_HR
196	16NF295_296	PSB640	G.max	Improved_cultivar	Russia	NA	37.35E	55.45N	WDD_NR
197	16NF297_298	CHESTNUT	G.max	Improved_cultivar	Russia	NA	37.35E	55.45N	WDD_NR
198	16NF309_310	CA26	G.max	Improved_cultivar	Canada	NA	73.58W	45.20N	WDD_NR
199	16NF321_322	Saikai 20	G.max	Improved_cultivar	Japan	NA	139.69E	35.69N	WDD_HR
200	16NF323_324	WuMing6	G.max	Improved_cultivar	Japan	NA	139.69E	35.69N	WDD_HR
201	16NF333_334	RiBen54Hao(AiZhiXian)	G.max	Improved_cultivar	Japan	NA	139.69E	35.69N	WDD_HR
202	16NF353_354	PSB471	G.max	Improved_cultivar	Russia	NA	37.35E	55.45N	WDD_NR
203	16NF371_372	FUN-ZHUN/g	G.max	Improved_cultivar	Russia	NA	37.35E	55.45N	WDD_NR
204	16NF419_420	ДВ 2849	G.max	Improved_cultivar	Russia	NA	37.35E	55.45N	WDD_NR
205	16NF479_480	ER-HUAN-YAN	G.max	Improved_cultivar	Russia	NA	37.35E	55.45N	WDD_NR
206	16NF505_506	Namcheon	G.max	Improved_cultivar	South_Korea	NA	126.37E	37.28N	WDD_HR
207	16NF529_530	Jangbaeeg	G.max	Improved_cultivar	South_Korea	NA	126.37E	37.28N	WDD_HR
208	16NF535	YouBiLie	G.max	Improved_cultivar	Russia	NA	37.35E	55.45N	WDD_NR
209	16NF565_566	Koreane 4	G.max	Improved_cultivar	North_Korea	NA	125.30E	39.01N	WDD_HR
210	16NF684_685	JiYu47	G.max	Improved_cultivar	China	JiLin	125.18E	43.55N	NR
211	16NF688_689	JiLinXiLiDou	G.max	Improved_cultivar	China	JiLin	125.18E	43.55N	NR
212	16NF1005_1006	DongNong4Hao	G.max	Improved_cultivar	China	HeiLongJiang	126.64E	45.76N	NR
213	16NF1007_1008	FengShou1Hao	G.max	Improved_cultivar	China	HeiLongJiang	126.64E	45.76N	NR
214	16NF1011_1012	HeiHe3Hao	G.max	Improved_cultivar	China	HeiLongJiang	126.64E	45.76N	NR
215	16NF1013_1014	HeiHe51	G.max	Improved_cultivar	China	HeiLongJiang	126.64E	45.76N	NR
216	16NF1015_1016	HeiHe54	G.max	Improved_cultivar	China	HeiLongJiang	126.64E	45.76N	NR
217	16NF1017_1018	MuFeng1Hao	G.max	Improved_cultivar	China	HeiLongJiang	126.64E	45.76N	NR
218	16NF1021_1022	ManCangJin1	G.max	Landrace	China	HeiLongJiang	126.64E	45.76N	NR
219	16NF1025_1026	JingShanPu	G.max	Improved_cultivar	China	HeiLongJiang	126.64E	45.76N	NR
220	16NF1031_1032	MaoDou1	G.max	Landrace	China	HeiLongJiang	126.64E	45.76N	NR
221	16NF1035_1036	CaiZhongPu	G.max	Landrace	China	HeiLongJiang	126.64E	45.76N	NR
222	16NF1039_1040	TuJiaZi	G.max	Landrace	China	HeiLongJiang	126.64E	45.76N	NR
223	16NF1043_1044	YaPoChe	G.max	Landrace	China	HeiLongJiang	126.64E	45.76N	NR
224	16NF1047_1048	LiuShiTianHuanJia	G.max	Landrace	China	HeiLongJiang	126.64E	45.76N	NR
225	16NF1049_1050	HaiLunDuLuDou	G.max	Landrace	China	HeiLongJiang	126.64E	45.76N	NR
226	16NF1051_1052	XiaoBaiDou1	G.max	Landrace	China	HeiLongJiang	126.64E	45.76N	NR
227	16NF1053_1054	HuaNanXiaoJinDou	G.max	Landrace	China	HeiLongJiang	126.64E	45.76N	NR
228	16NF1059_1060	BaoQingLvDaDou	G.max	Landrace	China	HeiLongJiang	126.64E	45.76N	NR
229	16NF1061_1062	LvPiaoHeiDou	G.max	Landrace	China	HeiLongJiang	126.64E	45.76N	NR
230	16NF1069_1070	JiLin3Hao	G.max	Improved_cultivar	China	JiLin	125.18E	43.55N	NR
231	16NF1083_1084	Ha1Hao	G.max	Landrace	China	JiLin	125.18E	43.55N	NR
232	16NF1085_1086	DaLiHuang1	G.max	Landrace	China	JiLin	125.18E	43.55N	NR
233	16NF1091_1092	XiaoBaiQi1	G.max	Landrace	China	JiLin	125.18E	43.55N	NR
234	16NF1093_1094	DaBaiMei1	G.max	Landrace	China	JiLin	125.18E	43.55N	NR
235	16NF1095_1096	HuiChunDou	G.max	Landrace	China	JiLin	125.18E	43.55N	NR
236	16NF1099_1100	JiaoHeZiHua1Hao	G.max	Landrace	China	JiLin	125.18E	43.55N	NR
237	16NF1101_1102	LanQi	G.max	Landrace	China	JiLin	125.18E	43.55N	NR
238	16NF1105_1106	ShuLanManCangJin	G.max	Landrace	China	JiLin	125.18E	43.55N	NR
239	16NF1107_1108	YiTongManCangJin	G.max	Landrace	China	JiLin	125.18E	43.55N	NR
240	16NF1113_1114	DaHongQi	G.max	Landrace	China	JiLin	125.18E	43.55N	NR
241	16NF1117_1118	QingZaDou	G.max	Landrace	China	JiLin	125.18E	43.55N	NR
242	16NF1119_1120	HeiDou28	G.max	Landrace	China	JiLin	125.18E	43.55N	NR
243	16NF1121_1122	HeiDaDou3	G.max	Landrace	China	JiLin	125.18E	43.55N	NR
244	16NF1127_1128	HeiMoDou	G.max	Landrace	China	JiLin	125.18E	43.55N	NR
245	16NF1131_1132	TieFeng8Hao	G.max	Improved_cultivar	China	LiaoNing	123.23E	41.48N	NR
246	16NF1133_1134	TieFeng18	G.max	Improved_cultivar	China	LiaoNing	123.23E	41.48N	NR
247	16NF1135_1136	JinDou33	G.max	Improved_cultivar	China	LiaoNing	123.23E	41.48N	NR
248	16NF1147_1148	DaBaiMei2	G.max	Landrace	China	LiaoNing	123.23E	41.48N	NR
249	16NF1159_1160	HeiQi	G.max	Landrace	China	LiaoNing	123.23E	41.48N	NR
250	16NF1163_1164	ManDiJin	G.max	Landrace	China	LiaoNing	123.23E	41.48N	NR
251	16NF1167_1168	TieJiaJinPing	G.max	Landrace	China	LiaoNing	123.23E	41.48N	NR
252	16NF1171_1172	XiaoBaiQi2	G.max	Landrace	China	LiaoNing	123.23E	41.48N	NR
253	16NF1189_1190	QingPi1	G.max	Landrace	China	LiaoNing	123.23E	41.48N	NR
254	16NF1195_1196	QingPiPingDingXiang	G.max	Landrace	China	LiaoNing	123.23E	41.48N	NR
255	16NF1197_1198	BaiTieJia	G.max	Landrace	China	LiaoNing	123.23E	41.48N	NR
256	16NF1199_1200	BaiHeiDou	G.max	Landrace	China	LiaoNing	123.23E	41.48N	NR
257	16NF1203_1204	LiuTiaoQing	G.max	Landrace	China	LiaoNing	123.23E	41.48N	NR
258	16NF1209_1210	XiaoLiHei	G.max	Landrace	China	LiaoNing	123.23E	41.48N	NR
259	16NF1215_1216	XiaoLiHeiDou1	G.max	Landrace	China	LiaoNing	123.23E	41.48N	NR
260	16NF1217_1218	LianMaoHuiHeiDou	G.max	Landrace	China	LiaoNing	123.23E	41.48N	NR
261	16NF1235_1236	HeiJian1Hao	G.max	Improved_cultivar	China	HeiLongJiang	126.64E	45.76N	NR
262	16NF1243_1244	HeFeng26Hao	G.max	Improved_cultivar	China	HeiLongJiang	126.64E	45.76N	NR
263	16NF1245_1246	SuiNong6Hao	G.max	Improved_cultivar	China	HeiLongJiang	126.64E	45.76N	NR
264	16NF1253_1254	HeQi	G.max	Landrace	China	HeiLongJiang	126.64E	45.76N	NR
265	16NF1255_1256	SiLiHuang(Nong16-1)	G.max	Landrace	China	HeiLongJiang	126.64E	45.76N	NR
266	16NF1287_1288	ZhengGuang1Hao	G.max	Improved_cultivar	China	JiLin	125.18E	43.55N	NR
267	16NF1311_1312	QianGuoHeMao	G.max	Landrace	China	JiLin	125.18E	43.55N	NR
268	16NF1315_1316	Nong'AnJiangSeDou	G.max	Landrace	China	JiLin	125.18E	43.55N	NR
269	16NF1317_1318	YongJiZaoDou	G.max	Landrace	China	JiLin	125.18E	43.55N	NR
270	16NF1327_1328	KaiYuBaHao	G.max	Improved_cultivar	China	LiaoNing	123.23E	41.48N	NR
271	16NF1333_1334	JinYuanDou	G.max	Landrace	China	LiaoNing	123.23E	41.48N	NR
272	16NF1335_1336	QingErHei	G.max	Landrace	China	LiaoNing	123.23E	41.48N	NR
273	16NF1341_1342	HeiHe5Hao	G.max	Improved_cultivar	China	HeiLongJiang	126.64E	45.76N	NR
274	16NF1343_1344	HeiHe6Hao	G.max	Improved_cultivar	China	HeiLongJiang	126.64E	45.76N	NR
275	16NF1349_1350	HeiHe9Hao	G.max	Improved_cultivar	China	HeiLongJiang	126.64E	45.76N	NR
276	16NF1351_1352	HeFeng29Hao	G.max	Improved_cultivar	China	HeiLongJiang	126.64E	45.76N	NR
277	16NF1353_1354	DongNong47-1C	G.max	Improved_cultivar	China	HeiLongJiang	126.64E	45.76N	NR
278	16NF1355_1356	HeiHe101	G.max	Improved_cultivar	China	HeiLongJiang	126.64E	45.76N	NR
279	16NF1363_1364	JiLinXiaoLi1Hao	G.max	Improved_cultivar	China	JiLin	125.18E	43.55N	NR
280	16NF1379_1380	KeQiXiaoLiHeiDou	G.max	Landrace	China	NeiMengGu	111.65E	40.82N	NR
281	16NF1383_1384	HeiNong37	G.max	Improved_cultivar	China	HeiLongJiang	126.64E	45.76N	NR
282	16NF1385_1386	HeiNong39	G.max	Improved_cultivar	China	HeiLongJiang	126.64E	45.76N	NR
283	16NF1397_1398	KenNong4Hao	G.max	Improved_cultivar	China	HeiLongJiang	126.64E	45.76N	NR
284	16NF1399_1400	HeFeng35	G.max	Improved_cultivar	China	HeiLongJiang	126.64E	45.76N	NR
285	16NF1403_1404	HeiHe10Hao	G.max	Improved_cultivar	China	HeiLongJiang	126.64E	45.76N	NR
286	16NF1407	HeiHe12	G.max	Improved_cultivar	China	HeiLongJiang	126.64E	45.76N	NR
287	16NF1409	HeiHe13	G.max	Improved_cultivar	China	HeiLongJiang	126.64E	45.76N	NR
288	16NF1413_1414	HeiHe15	G.max	Improved_cultivar	China	HeiLongJiang	126.64E	45.76N	NR
289	16NF1421_1422	JiLin36	G.max	Improved_cultivar	China	JiLin	125.18E	43.55N	NR
290	16NF1423_1424	JiuNong21	G.max	Improved_cultivar	China	JiLin	125.18E	43.55N	NR
291	16NF1451_1452	HeFeng40	G.max	Improved_cultivar	China	HeiLongJiang	126.64E	45.76N	NR
292	16NF1471	HeiHe26	G.max	Improved_cultivar	China	HeiLongJiang	126.64E	45.76N	NR
293	16NF1477_1478	HeiHe30	G.max	Improved_cultivar	China	HeiLongJiang	126.64E	45.76N	NR
294	16NF1479	HeiHe31	G.max	Improved_cultivar	China	HeiLongJiang	126.64E	45.76N	NR
295	16NF1481	HeiNong43	G.max	Improved_cultivar	China	HeiLongJiang	126.64E	45.76N	NR
296	16NF1483_1484	HongFeng11	G.max	Improved_cultivar	China	HeiLongJiang	126.64E	45.76N	NR
297	16NF1485_1486	BeiJiang1Hao	G.max	Improved_cultivar	China	HeiLongJiang	126.64E	45.76N	NR
298	16NF1489_1490	KenNong18	G.max	Improved_cultivar	China	HeiLongJiang	126.64E	45.76N	NR
299	16NF1491_1492	SuiNong20	G.max	Improved_cultivar	China	HeiLongJiang	126.64E	45.76N	NR
300	16NF1493_1494	JiLin30	G.max	Improved_cultivar	China	JiLin	125.18E	43.55N	NR
301	16NF1495_1496	JiYu48	G.max	Improved_cultivar	China	JiLin	125.18E	43.55N	NR
302	16NF1497_1498	JiYu67	G.max	Improved_cultivar	China	JiLin	125.18E	43.55N	NR
303	16NF1503_1504	LiaoDou11	G.max	Improved_cultivar	China	LiaoNing	123.23E	41.48N	NR
304	16NF1505_1506	LiaoDou16	G.max	Improved_cultivar	China	LiaoNing	123.23E	41.48N	NR
305	16NF1507_1508	TieFeng30	G.max	Improved_cultivar	China	LiaoNing	123.23E	41.48N	NR
306	16NF1509_1510	MengDou12	G.max	Improved_cultivar	China	NeiMengGu	111.65E	40.82N	NR
307	16NF1515_1516	HeiHe35	G.max	Improved_cultivar	China	HeiLongJiang	126.64E	45.76N	NR
308	16NF1517_1518	HeiHe37	G.max	Improved_cultivar	China	HeiLongJiang	126.64E	45.76N	NR
309	16NF1519_1520	HeiHe38	G.max	Improved_cultivar	China	HeiLongJiang	126.64E	45.76N	NR
310	16NF1521_1522	HeiHe39	G.max	Improved_cultivar	China	HeiLongJiang	126.64E	45.76N	NR
311	16NF1523_1524	HeiHe40	G.max	Improved_cultivar	China	HeiLongJiang	126.64E	45.76N	NR
312	16NF1525_1526	HeiHe41	G.max	Improved_cultivar	China	HeiLongJiang	126.64E	45.76N	NR
313	16NF1527_1528	HeiHe42	G.max	Improved_cultivar	China	HeiLongJiang	126.64E	45.76N	NR
314	16NF1531_1532	HeiHe50	G.max	Improved_cultivar	China	HeiLongJiang	126.64E	45.76N	NR
315	16NF1533_1534	BeiFeng9Hao	G.max	Improved_cultivar	China	HeiLongJiang	126.64E	45.76N	NR
316	16NF1535_1536	HuaJiang4Hao	G.max	Improved_cultivar	China	HeiLongJiang	126.64E	45.76N	NR
317	16NF1537_1538	KenFeng13	G.max	Improved_cultivar	China	HeiLongJiang	126.64E	45.76N	NR
318	16NF1539_1540	KenFeng16	G.max	Improved_cultivar	China	HeiLongJiang	126.64E	45.76N	NR
319	16NF1541_1542	KenFeng17	G.max	Improved_cultivar	China	HeiLongJiang	126.64E	45.76N	NR
320	16NF1543_1544	KenFeng22	G.max	Improved_cultivar	China	HeiLongJiang	126.64E	45.76N	NR
321	16NF1545_1546	BeiDou5Hao	G.max	Improved_cultivar	China	HeiLongJiang	126.64E	45.76N	NR
322	16NF1557_1558	HeiNong47	G.max	Improved_cultivar	China	HeiLongJiang	126.64E	45.76N	NR
323	16NF1559_1560	HeiNong48	G.max	Improved_cultivar	China	HeiLongJiang	126.64E	45.76N	NR
324	16NF1561_1562	DongNong50	G.max	Improved_cultivar	China	HeiLongJiang	126.64E	45.76N	NR
325	16NF1563_1564	JiNong22	G.max	Improved_cultivar	China	JiLin	125.18E	43.55N	NR
326	16NF1567_1568	TieFeng29	G.max	Improved_cultivar	China	LiaoNing	123.23E	41.48N	NR
327	16NF1569_1570	JinDou36	G.max	Improved_cultivar	China	LiaoNing	123.23E	41.48N	NR
328	16NF1571_1572	MengDou14	G.max	Improved_cultivar	China	NeiMengGu	111.65E	40.82N	NR
329	16NF1575_1576	JiangMoDou1Hao	G.max	Improved_cultivar	China	HeiLongJiang	126.64E	45.76N	NR
330	16NF1583_1584	HeiHe49	G.max	Improved_cultivar	China	HeiLongJiang	126.64E	45.76N	NR
331	16NF1585_1586	HeiHe44	G.max	Improved_cultivar	China	HeiLongJiang	126.64E	45.76N	NR
332	16NF1587_1588	HeiHe33	G.max	Improved_cultivar	China	HeiLongJiang	126.64E	45.76N	NR
333	16NF1589_1590	HeiHe51hao	G.max	Improved_cultivar	China	HeiLongJiang	126.64E	45.76N	NR
334	16NF1591_1592	HeiHe43	G.max	Improved_cultivar	China	HeiLongJiang	126.64E	45.76N	NR
335	16NF1593_1594	HeiHe18	G.max	Improved_cultivar	China	HeiLongJiang	126.64E	45.76N	NR
336	16NF1597_1598	HeiKe60Hao	G.max	Improved_cultivar	China	HeiLongJiang	126.64E	45.76N	NR
337	16NF1599_1600	LiaoDou26	G.max	Improved_cultivar	China	LiaoNing	123.23E	41.48N	NR
338	16NF1601_1602	LiaoXiaoLiDou2Hao	G.max	Improved_cultivar	China	LiaoNing	123.23E	41.48N	NR
339	16NF1603_1604	LiaoDou24	G.max	Improved_cultivar	China	LiaoNing	123.23E	41.48N	NR
340	16NF1605_1606	LiaoDou32	G.max	Improved_cultivar	China	LiaoNing	123.23E	41.48N	NR
341	16NF1607_1608	LiaoDou37	G.max	Improved_cultivar	China	LiaoNing	123.23E	41.48N	NR
342	16NF1609_1610	Liao08Q104	G.max	Improved_cultivar	China	LiaoNing	123.23E	41.48N	NR
343	16NF1611_1612	Liao10Q015	G.max	Improved_cultivar	China	LiaoNing	123.23E	41.48N	NR
344	16NF1613_1614	Liao0913	G.max	Improved_cultivar	China	LiaoNing	123.23E	41.48N	NR
345	16NF1615_1616	Liao08012	G.max	Improved_cultivar	China	LiaoNing	123.23E	41.48N	NR
346	16NF1617_1618	Liao08024	G.max	Improved_cultivar	China	LiaoNing	123.23E	41.48N	NR
347	16NF1619_1620	AXN-1-55	G.max	Improved_cultivar	United_States	NA	74.25W	40.69N	WDD_HR
348	16NF1621_1622	LongPin12-328	G.max	Improved_cultivar	China	HeiLongJiang	126.64E	45.76N	NR
349	16NF1623_1624	LongPin13-369	G.max	Improved_cultivar	China	HeiLongJiang	126.64E	45.76N	NR
350	16NF1625_1626	LongPin10-217	G.max	Improved_cultivar	China	HeiLongJiang	126.64E	45.76N	NR
351	16NF1627_1628	JiYu105	G.max	Improved_cultivar	China	JiLin	125.18E	43.55N	NR
352	16NF1629_1630	JiYu108	G.max	Improved_cultivar	China	JiLin	125.18E	43.55N	NR
353	16NF1631_1632	JiYu109	G.max	Improved_cultivar	China	JiLin	125.18E	43.55N	NR
354	16NF1633_1634	JiYu101	G.max	Improved_cultivar	China	JiLin	125.18E	43.55N	NR
355	16NF1637_1638	JiLinXiaoLi7Hao	G.max	Improved_cultivar	China	JiLin	125.18E	43.55N	NR
356	16NF1639_1640	JiYu86	G.max	Improved_cultivar	China	JiLin	125.18E	43.55N	NR
357	16NF1641_1642	JiYu404	G.max	Improved_cultivar	China	JiLin	125.18E	43.55N	NR
358	16NF1643_1644	JiYu406	G.max	Improved_cultivar	China	JiLin	125.18E	43.55N	NR
359	16NF1645_1646	JiYu302	G.max	Improved_cultivar	China	JiLin	125.18E	43.55N	NR
360	16NF1647_1648	JiYu204	G.max	Improved_cultivar	China	JiLin	125.18E	43.55N	NR
361	16NF1649_1650	JL15-13	G.max	Improved_cultivar	China	JiLin	125.18E	43.55N	NR
362	16NF1651_1652	YZY2004-15-W90	G.max	Improved_cultivar	China	BeiJing	116.28E	39.54N	NR
363	16NF1653_1654	YZY2004-15-15W83	G.max	Improved_cultivar	China	BeiJing	116.28E	39.54N	NR
364	16NF1655_1656	JiMiDou2Hao	G.max	Improved_cultivar	China	JiLin	125.18E	43.55N	NR
365	16NF1657_1658	JiMiDou3Hao	G.max	Improved_cultivar	China	JiLin	125.18E	43.55N	NR
366	16NF1659_1660	Ke11-1669	G.max	Improved_cultivar	China	HeiLongJiang	126.64E	45.76N	NR
367	16NF1661_1662	Ke'c14-732	G.max	Improved_cultivar	China	HeiLongJiang	126.64E	45.76N	NR
368	16NF1663_1664	Ke09-95	G.max	Improved_cultivar	China	HeiLongJiang	126.64E	45.76N	NR
369	16NF1665_1666	Ls15	G.max	Improved_cultivar	China	HeiLongJiang	126.64E	45.76N	NR
370	16NF1667_1668	Ls18	G.max	Improved_cultivar	China	HeiLongJiang	126.64E	45.76N	NR
371	16NF1671_1672	1428	G.max	Improved_cultivar	China	HeiLongJiang	126.64E	45.76N	NR
372	16NF1673_1674	1474	G.max	Improved_cultivar	China	HeiLongJiang	126.64E	45.76N	NR
373	16NF1675_1676	2020	G.max	Improved_cultivar	China	HeiLongJiang	126.64E	45.76N	NR
374	16NF1677_1678	Ha13-2089	G.max	Improved_cultivar	China	HeiLongJiang	126.64E	45.76N	NR
375	16NF1679_1680	Ha13-2413	G.max	Improved_cultivar	China	HeiLongJiang	126.64E	45.76N	NR
376	16NF1681_1682	Ha13-2958	G.max	Improved_cultivar	China	HeiLongJiang	126.64E	45.76N	NR
377	16NF1683_1684	Ha14-2028	G.max	Improved_cultivar	China	HeiLongJiang	126.64E	45.76N	NR
378	16NF1685_1686	Ha12-3510	G.max	Improved_cultivar	China	HeiLongJiang	126.64E	45.76N	NR
379	16NF1687_1688	Ha13-2185	G.max	Improved_cultivar	China	HeiLongJiang	126.64E	45.76N	NR
380	16NF1689_1690	Ha13-2187	G.max	Improved_cultivar	China	HeiLongJiang	126.64E	45.76N	NR
381	16NF1691_1692	Ha14-2146	G.max	Improved_cultivar	China	HeiLongJiang	126.64E	45.76N	NR
382	16NF1693_1694	Ha12-4547	G.max	Improved_cultivar	China	HeiLongJiang	126.64E	45.76N	NR
383	16NF1695_1696	Ha13-1613	G.max	Improved_cultivar	China	HeiLongJiang	126.64E	45.76N	NR
384	16NF1697_1698	Ha11-4519	G.max	Improved_cultivar	China	HeiLongJiang	126.64E	45.76N	NR
385	16NF1699_1700	Ha11-3646	G.max	Improved_cultivar	China	HeiLongJiang	126.64E	45.76N	NR
386	16NF1701_1702	Ha11-4142	G.max	Improved_cultivar	China	HeiLongJiang	126.64E	45.76N	NR
387	16NF1703_1704	Ha11-2541	G.max	Improved_cultivar	China	HeiLongJiang	126.64E	45.76N	NR
388	16NF1705_1706	Ha12-4891	G.max	Improved_cultivar	China	HeiLongJiang	126.64E	45.76N	NR
389	16NF1707_1708	DongSheng7Hao	G.max	Improved_cultivar	China	HeiLongJiang	126.64E	45.76N	NR
390	16NF1711_1712	ZhongKeMaoDou2Hao	G.max	Improved_cultivar	China	HeiLongJiang	126.64E	45.76N	NR
391	16NF1713_1714	BanBenZaoSheng	G.max	Improved_cultivar	Japan	NA	139.69E	35.69N	WDD_HR
392	16NF1721_1722	Toyomosume	G.max	Improved_cultivar	Japan	NA	139.69E	35.69N	WDD_HR
393	16NF1723_1724	Kariyutaka	G.max	Improved_cultivar	Japan	Hokkaido	139.20E	40.33N	WDD_HR
394	16NF1725_1726	DongSheng7Hao	G.max	Improved_cultivar	China	HeiLongJiang	126.64E	45.76N	NR
395	16NF1729_1730	JiLinCaiLiXiang	G.max	Landrace	China	JiLin	125.18E	43.55N	NR
396	16NF1731_1732	ChangNong16	G.max	Improved_cultivar	China	JiLin	125.18E	43.55N	NR
397	16NF1733_1734	HLT1--HeiHe13	G.max	Improved_cultivar	China	HeiLongJiang	126.64E	45.76N	NR
398	16NF1735_1736	HLT2--HeiHe13	G.max	Improved_cultivar	China	HeiLongJiang	126.64E	45.76N	NR
399	16NF1737_1738	HLT3--HeiHe13	G.max	Improved_cultivar	China	HeiLongJiang	126.64E	45.76N	NR
400	16NF1739_1740	HLT4--HeiHe13	G.max	Improved_cultivar	China	HeiLongJiang	126.64E	45.76N	NR
401	16NF1741_1742	HLT5--HeiHe13	G.max	Improved_cultivar	China	HeiLongJiang	126.64E	45.76N	NR
402	16NF1745_1746	HLT7--HeiHe13	G.max	Improved_cultivar	China	HeiLongJiang	126.64E	45.76N	NR
403	16NF1747_1748	HLT8--HeiHe13	G.max	Improved_cultivar	China	HeiLongJiang	126.64E	45.76N	NR
404	16NF1749_1750	KeShan1Hao	G.max	Improved_cultivar	China	HeiLongJiang	126.64E	45.76N	NR
405	16NF1751_1752	JiYu72	G.max	Improved_cultivar	China	JiLin	125.18E	43.55N	NR
406	16NF1753_1754	TieFeng31	G.max	Improved_cultivar	China	LiaoNing	123.23E	41.48N	NR
407	16NF1757_1758	HeJiao02-69	G.max	Improved_cultivar	China	HeiLongJiang	126.64E	45.76N	NR
408	16NF1767_1768	MiYunHeiDou	G.max	Landrace	China	BeiJing	116.28E	39.54N	NR
409	16NF1769_1770	ShunYiHeiDou	G.max	Landrace	China	BeiJing	116.28E	39.54N	NR
410	16NF1779_1780	MaoHuangDou	G.max	Landrace	China	HeBei	114.26E	38.03N	NR
411	16NF1783_1784	JiZaoHuang1	G.max	Landrace	China	HeBei	114.26E	38.03N	NR
412	16NF1785_1786	ZhuangYuanQingHeiDou	G.max	Landrace	China	HeBei	114.26E	38.03N	NR
413	16NF1787_1788	JinDou371	G.max	Improved_cultivar	China	ShanXi	112.33E	37.51N	NR
414	16NF1801_1802	DaBaiDou1	G.max	Landrace	China	ShanXi	112.33E	37.51N	NR
415	16NF1815_1816	XiaoHeiDou12	G.max	Landrace	China	ShanXi	112.33E	37.51N	NR
416	16NF1817_1818	XiaoHeiDou27	G.max	Landrace	China	ShanXi	112.33E	37.51N	NR
417	16NF1823_1824	HeiDou10	G.max	Landrace	China	ShanXi	112.33E	37.51N	NR
418	16NF1827_1828	ChiBuLiuHeiDou	G.max	Landrace	China	ShanXi	112.33E	37.51N	NR
419	16NF1831_1832	ChuanManHeiDou	G.max	Landrace	China	ShanXi	112.33E	37.51N	NR
420	16NF1853_1854	XiaoHeiDou13	G.max	Landrace	China	ShanXi	112.33E	37.51N	NR
421	16NF1861_1862	XiaoHeiDou	G.max	Landrace	China	ShanXi	112.33E	37.51N	NR
422	16NF1867_1868	XiaoKeHei	G.max	Landrace	China	ShanXi	112.33E	37.51N	NR
423	16NF1869_1870	XiaoHeiDou	G.max	Landrace	China	ShanXi	112.33E	37.51N	NR
424	16NF1871_1872	XiaoHeiDou	G.max	Landrace	China	ShanXi	112.33E	37.51N	NR
425	16NF1875_1876	TuHeiDou	G.max	Landrace	China	ShanXi	112.33E	37.51N	NR
426	16NF1877_1878	YuanHeiDou2	G.max	Landrace	China	ShanXi	112.33E	37.51N	NR
427	16NF1879_1880	HongHeiDou	G.max	Landrace	China	ShanXi	112.33E	37.51N	NR
428	16NF1881_1882	HongDaDou	G.max	Landrace	China	ShanXi	112.33E	37.51N	NR
429	16NF1883_1884	MaiZiDou	G.max	Landrace	China	ShanXi	112.33E	37.51N	NR
430	16NF1885_1886	HongXiaoDou	G.max	Landrace	China	ShanXi	112.33E	37.51N	NR
431	16NF1909_1910	TongXianHuangDou	G.max	Landrace	China	BeiJing	116.28E	39.54N	NR
432	16NF1917_1918	YanQingChaDou	G.max	Landrace	China	BeiJing	116.28E	39.54N	NR
433	16NF1927_1928	LouTianWaZiHeiDou	G.max	Landrace	China	NingXia	106.13E	38.28N	NR
434	16NF1929_1930	NiDingHuaMeiDou	G.max	Landrace	China	NingXia	106.13E	38.28N	NR
435	16NF1941_1942	GuanJiaWuDaJinYuan	G.max	Landrace	China	HeBei	114.26E	38.03N	NR
436	16NF1945_1946	XinHuaXiaoJinYuan	G.max	Landrace	China	HeBei	114.26E	38.03N	NR
437	16NF1949_1950	XiaoZhangDaHuangDou	G.max	Landrace	China	HeBei	114.26E	38.03N	NR
438	16NF1951_1952	YiWoHouHuangDou	G.max	Landrace	China	HeBei	114.26E	38.03N	NR
439	16NF1957_1958	DaQingPiHuangDou	G.max	Landrace	China	HeBei	114.26E	38.03N	NR
440	16NF1967_1968	XuZhuangDaHeiDou	G.max	Landrace	China	HeBei	114.26E	38.03N	NR
441	16NF2001_2002	DaHuangDou<1>	G.max	Landrace	China	ShanXi	112.33E	37.51N	NR
442	16NF2009_2010	DaHuangDou3	G.max	Landrace	China	ShanXi	112.33E	37.51N	NR
443	16NF2023_2024	LvSeDou	G.max	Landrace	China	ShanXi	112.33E	37.51N	NR
444	16NF2027_2028	DaQingDou2	G.max	Landrace	China	ShanXi	112.33E	37.51N	NR
445	16NF2037_2038	XiaoHeiDou6	G.max	Landrace	China	ShanXi	112.33E	37.51N	NR
446	16NF2047_2048	HeiGunDou1	G.max	Landrace	China	ShanXi	112.33E	37.51N	NR
447	16NF2051_2052	HeiDou16	G.max	Landrace	China	ShanXi	112.33E	37.51N	NR
448	16NF2061_2062	XiaoHeiDou7	G.max	Landrace	China	ShanXi	112.33E	37.51N	NR
449	16NF2093_2094	HongMeiDou<2>	G.max	Landrace	China	ShanXi	112.33E	37.51N	NR
450	16NF2095_2096	HongMeiDou	G.max	Landrace	China	ShanXi	112.33E	37.51N	NR
451	16NF2109_2110	BaoGongDou	G.max	Landrace	China	ShanXi	112.33E	37.51N	NR
452	16NF2111_2112	JingSiDou	G.max	Landrace	China	ShanXi	112.33E	37.51N	NR
453	16NF2115_2116	CanSiDou2	G.max	Landrace	China	ShanXi	112.33E	37.51N	NR
454	16NF2117_2118	GuiLianBaiDou	G.max	Landrace	China	ShanXi	112.33E	37.51N	NR
455	16NF2119_2120	HuangDou3	G.max	Landrace	China	ShaanXi	108.55E	34.15N	NR
456	16NF2121_2122	BaYueZha2	G.max	Landrace	China	ShaanXi	108.55E	34.15N	NR
457	16NF2129_2130	LvDaBaiDou	G.max	Landrace	China	ShaanXi	108.55E	34.15N	NR
458	16NF2131_2132	LvPiDaDou	G.max	Landrace	China	ShaanXi	108.55E	34.15N	NR
459	16NF2133_2134	LvDaDou2	G.max	Landrace	China	ShaanXi	108.55E	34.15N	NR
460	16NF2135_2136	BenDiHeiDou	G.max	Landrace	China	ShaanXi	108.55E	34.15N	NR
461	16NF2139_2140	SanGuTiaoHeiDou	G.max	Landrace	China	ShaanXi	108.55E	34.15N	NR
462	16NF2141_2142	YuanBoHeiDou	G.max	Landrace	China	ShaanXi	108.55E	34.15N	NR
463	16NF2143_2144	XiaoHeiDou10	G.max	Landrace	China	ShaanXi	108.55E	34.15N	NR
464	16NF2145_2146	HeiHeiDou3	G.max	Landrace	China	ShaanXi	108.55E	34.15N	NR
465	16NF2147_2148	NiuWeiBaHeiDou	G.max	Landrace	China	ShaanXi	108.55E	34.15N	NR
466	16NF2151_2152	ZaoShuHeiDou	G.max	Landrace	China	ShaanXi	108.55E	34.15N	NR
467	16NF2169_2170	BaYueZha4	G.max	Landrace	China	GanSu	103.50E	36.03N	NR
468	16NF2173_2174	HuangPiXiaoHuangDou	G.max	Landrace	China	GanSu	103.50E	36.03N	NR
469	16NF2175_2176	HuangGunDou	G.max	Landrace	China	GanSu	103.50E	36.03N	NR
470	16NF2185_2186	HeiGunDou3	G.max	Landrace	China	GanSu	103.50E	36.03N	NR
471	16NF2195_2196	MaHeiDou	G.max	Landrace	China	GanSu	103.50E	36.03N	NR
472	16NF2197_2198	HuoHuangDou	G.max	Landrace	China	GanSu	103.50E	36.03N	NR
473	16NF2215_2216	ManZhangZiXiaoLiHeiDou	G.max	Landrace	China	HeBei	114.26E	38.03N	NR
474	16NF2219_2220	NiuPiHuang	G.max	Landrace	China	HeBei	114.26E	38.03N	NR
475	16NF2223_2224	JinDou15Hao	G.max	Improved_cultivar	China	ShanXi	112.33E	37.51N	NR
476	16NF2225_2226	JinPin19Hao	G.max	Improved_cultivar	China	ShanXi	112.33E	37.51N	NR
477	16NF2231_2232	JinDou19	G.max	Improved_cultivar	China	ShanXi	112.33E	37.51N	NR
478	16NF2233_2234	FenDou31Hao	G.max	Improved_cultivar	China	ShanXi	112.33E	37.51N	NR
479	16NF2239_2240	MaoYan	G.max	Landrace	China	ShanXi	112.33E	37.51N	NR
480	16NF2243_2244	KeFeng14	G.max	Improved_cultivar	China	BeiJing	116.28E	39.54N	NR
481	16NF2247_2248	ZhongHuang14	G.max	Improved_cultivar	China	BeiJing	116.28E	39.54N	NR
482	16NF2253_2254	ZhongHuang20	G.max	Improved_cultivar	China	BeiJing	116.28E	39.54N	NR
483	16NF2267_2268	XinDaDou1Hao	G.max	Improved_cultivar	China	XinJiang	87.36E	43.46N	NR
484	16NF2269_2270	JiDou15	G.max	Improved_cultivar	China	HeBei	114.26E	38.03N	NR
485	16NF2277_2278	JinDou21	G.max	Improved_cultivar	China	ShanXi	112.33E	37.51N	NR
486	16NF2279_2280	JinDou28	G.max	Improved_cultivar	China	ShanXi	112.33E	37.51N	NR
487	16NF2281_2282	JinDou25	G.max	Improved_cultivar	China	ShanXi	112.33E	37.51N	NR
488	16NF2283_2284	QiHuang31(Lu99-7)	G.max	Improved_cultivar	China	ShanDong	120.18E	36.03N	HR
489	16NF2295_2296	KeXin3Hao	G.max	Improved_cultivar	China	BeiJing	116.28E	39.54N	NR
490	16NF2299_2300	ZhongHuang35	G.max	Improved_cultivar	China	BeiJing	116.28E	39.54N	NR
491	16NF2301_2302	ZhongHuang37	G.max	Improved_cultivar	China	BeiJing	116.28E	39.54N	NR
492	16NF2305_2306	JiDou17	G.max	Improved_cultivar	China	HeBei	114.26E	38.03N	NR
493	16NF2307_2308	JinDa78	G.max	Improved_cultivar	China	ShanXi	112.33E	37.51N	NR
494	16NF3493_3494	KeFeng1hao	G.max	Improved_cultivar	China	BeiJing	116.28E	39.54N	NR
495	16NF3505_3506	HuaChun2Hao	G.max	Improved_cultivar	China	GuangDong	113.18E	23.10N	SR
496	16NF4295_4296	ZhongHuang10	G.max	Improved_cultivar	China	BeiJing	116.28E	39.54N	NR
497	16NF4299_4300	ZhongHuang688	G.max	Improved_cultivar	China	BeiJing	116.28E	39.54N	NR
498	16NF4301_4302	HeiHe21	G.max	Improved_cultivar	China	HeiLongJiang	126.64E	45.76N	NR
499	16NF4303_4304	HeiHe23	G.max	Improved_cultivar	China	HeiLongJiang	126.64E	45.76N	NR
500	16NF4305_4306	HeiHe27	G.max	Improved_cultivar	China	HeiLongJiang	126.64E	45.76N	NR
501	16NF4404	HeiNong26	G.max	Improved_cultivar	China	HeiLongJiang	126.64E	45.76N	NR
502	16NF4405	BaiPiDou	G.max	Landrace	China	LiaoNing	123.23E	41.48N	NR
503	16NF4412	NiuMaoHuang3	G.max	Landrace	China	LiaoNing	123.23E	41.48N	NR
504	16NF4414	DaLiHeiDou2	G.max	Landrace	China	LiaoNing	123.23E	41.48N	NR
505	16NF4440	JinZhou4-1	G.max	Landrace	China	LiaoNing	123.23E	41.48N	NR
506	16NF4441	Kai8157-3-3-1	G.max	Improved_cultivar	China	LiaoNing	123.23E	41.48N	NR
507	16NF4447	BeiShiFoHuangDou	G.max	Landrace	China	HeBei	114.26E	38.03N	NR
508	16NF4449	XiaoHeiDou17	G.max	Landrace	China	ShanXi	112.33E	37.51N	NR
509	16NF4452	XiaoHeiDou9	G.max	Landrace	China	ShaanXi	108.55E	34.15N	NR
510	16NF4453	DongShan69	G.max	Improved_cultivar	China	ShanXi	112.33E	37.51N	NR
511	16NF4458	JiDou12	G.max	Improved_cultivar	China	HeBei	114.26E	38.03N	NR
512	16NF4467	DongLiaoKeShuang	G.max	Landrace	China	JiLin	125.18E	43.55N	NR
513	16NF4494	HeiNong2Hao	G.max	Improved_cultivar	China	HeiLongJiang	126.64E	45.76N	NR
514	16NF4497	HeiHe4Hao	G.max	Improved_cultivar	China	HeiLongJiang	126.64E	45.76N	NR
515	16NF4499	HeFeng25Hao	G.max	Improved_cultivar	China	HeiLongJiang	126.64E	45.76N	NR
516	16NF4500	Ke4430-20	G.max	Improved_cultivar	China	HeiLongJiang	126.64E	45.76N	NR
517	16NF4515	FenDou49	G.max	Improved_cultivar	China	ShanXi	112.33E	37.51N	NR
518	16NF4526	JiHuang138	G.max	Improved_cultivar	China	JiLin	125.18E	43.55N	NR
519	16NF4529	CanSiDou1	G.max	Landrace	China	ShanXi	112.33E	37.51N	NR
520	16NF4540	MaoYanDou2	G.max	Landrace	China	HeBei	114.26E	38.03N	NR
521	16NF4545	XiaoHeiDou8	G.max	Landrace	China	ShanXi	112.33E	37.51N	NR
522	16NF4546	JinYi9Hao	G.max	Improved_cultivar	China	ShanXi	112.33E	37.51N	NR
523	16NF4574	WuXing1Hao	G.max	Improved_cultivar	China	HeBei	114.26E	38.03N	NR
524	16NF4578	JinPin42	G.max	Improved_cultivar	China	ShanXi	112.33E	37.51N	NR
525	16NF4599	HeiHe32	G.max	Improved_cultivar	China	HeiLongJiang	126.64E	45.76N	NR
526	16NF4600	JinDou39	G.max	Improved_cultivar	China	ShanXi	112.33E	37.51N	NR
527	16NF4628_4629	HeiHe7Hao	G.max	Improved_cultivar	China	HeiLongJiang	126.64E	45.76N	NR
528	16NF4708	ZhongHuang39	G.max	Improved_cultivar	China	BeiJing	116.28E	39.54N	NR
529	16NF4714	ZhongHuang45	G.max	Improved_cultivar	China	BeiJing	116.28E	39.54N	NR
530	16NF4715	ZhongHuang19	G.max	Improved_cultivar	China	BeiJing	116.28E	39.54N	NR
531	16NF4716	ZhongPin95-5383	G.max	Improved_cultivar	China	BeiJing	116.28E	39.54N	NR
532	16NF4718	ZhongHuang22	G.max	Improved_cultivar	China	BeiJing	116.28E	39.54N	NR
533	16NF1443_1444	Zheng92116	G.max	Improved_cultivar	China	HeNan	113.40E	34.46N	NR
534	16NF2257_2258	ZhongDou27	G.max	Improved_cultivar	China	BeiJing	116.28E	39.54N	NR
535	16NF2285_2286	Zheng98005	G.max	Improved_cultivar	China	HeNan	113.40E	34.46N	NR
536	16NF2287_2288	XuDou11	G.max	Improved_cultivar	China	JiangSu	118.75E	32.04N	HR
537	16NF2289_2290	WanDou16	G.max	Improved_cultivar	China	AnHui	117.17E	31.52N	HR
538	16NF2291_2292	WanDou19	G.max	Improved_cultivar	China	AnHui	117.17E	31.52N	HR
539	16NF2321_2322	An1498	G.max	Improved_cultivar	China	NA	116.28E	39.54N	HR
540	16NF2325_2326	FenDou78	G.max	Improved_cultivar	China	ShanXi	112.33E	37.51N	NR
541	16NF2329_2330	QiHuang35	G.max	Improved_cultivar	China	ShanDong	120.18E	36.03N	HR
542	16NF2331_2332	QiHuang36	G.max	Improved_cultivar	China	ShanDong	120.18E	36.03N	HR
543	16NF2333_2334	QiHuang38	G.max	Improved_cultivar	China	ShanDong	120.18E	36.03N	HR
544	16NF2335_2336	QiHuang39	G.max	Improved_cultivar	China	ShanDong	120.18E	36.03N	HR
545	16NF2337_2338	QiHuang40	G.max	Improved_cultivar	China	ShanDong	120.18E	36.03N	HR
546	16NF2339_2340	QiHuang41	G.max	Improved_cultivar	China	ShanDong	120.18E	36.03N	HR
547	16NF2341_2342	QiHuang42	G.max	Improved_cultivar	China	ShanDong	120.18E	36.03N	HR
548	16NF2343_2344	ZhongHuang68	G.max	Improved_cultivar	China	BeiJing	116.28E	39.54N	NR
549	16NF2347_2348	ZhongZuo09-560	G.max	Improved_cultivar	China	BeiJing	116.28E	39.54N	NR
550	16NF2351_2352	Z11-78-1	G.max	Improved_cultivar	China	BeiJing	116.28E	39.54N	NR
551	16NF2353_2354	Z11-256	G.max	Improved_cultivar	China	BeiJing	116.28E	39.54N	NR
552	16NF2355_2356	6221-15	G.max	Improved_cultivar	China	BeiJing	116.28E	39.54N	NR
553	16NF2359_2360	Z11-245	G.max	Improved_cultivar	China	BeiJing	116.28E	39.54N	NR
554	16NF2361_2362	Z13-653-1	G.max	Improved_cultivar	China	BeiJing	116.28E	39.54N	NR
555	16NF2363_2364	Z13-630-15	G.max	Improved_cultivar	China	BeiJing	116.28E	39.54N	NR
556	16NF2365_2366	Z13-631-2	G.max	Improved_cultivar	China	BeiJing	116.28E	39.54N	NR
557	16NF2367_2368	Z13-642-4	G.max	Improved_cultivar	China	BeiJing	116.28E	39.54N	NR
558	16NF2369_2370	Z13-628-3	G.max	Improved_cultivar	China	BeiJing	116.28E	39.54N	NR
559	16NF2371_2372	Z13-631-7	G.max	Improved_cultivar	China	BeiJing	116.28E	39.54N	NR
560	16NF2373_2374	Z13-633-1	G.max	Improved_cultivar	China	BeiJing	116.28E	39.54N	NR
561	16NF2375_2376	Z13-653-6	G.max	Improved_cultivar	China	BeiJing	116.28E	39.54N	NR
562	16NF2377_2378	XuDou9Hao	G.max	Improved_cultivar	China	JiangSu	118.75E	32.04N	HR
563	16NF2379_2380	SiDou288	G.max	Improved_cultivar	China	JiangSu	118.75E	32.04N	HR
564	16NF2381_2382	WanDou33	G.max	Improved_cultivar	China	AnHui	117.17E	31.52N	HR
565	16NF2389_2390	TianLongYiHao	G.max	Improved_cultivar	China	HuBei	115.32E	30.52N	SR
566	16NF2395_2396	ZhongDou8Hao	G.max	Improved_cultivar	China	HuBei	115.32E	30.52N	SR
567	16NF2415_2416	XiaoLiQingDou	G.max	Landrace	China	HeBei	114.26E	38.03N	HR
568	16NF2427_2428	LeTingXiaoHeiDou	G.max	Landrace	China	HeBei	114.26E	38.03N	HR
569	16NF2429_2430	HeiDou	G.max	Landrace	China	HeBei	114.26E	38.03N	HR
570	16NF2433_2434	SuNingXiaoHeiDou	G.max	Landrace	China	HeBei	114.26E	38.03N	HR
571	16NF2437_2438	PingDingHuangHeiDou	G.max	Landrace	China	HeBei	114.26E	38.03N	HR
572	16NF2445_2446	PingDingHuangHeiDou2	G.max	Landrace	China	HeBei	114.26E	38.03N	HR
573	16NF2451_2452	HeiDou5	G.max	Landrace	China	HeBei	114.26E	38.03N	HR
574	16NF2453_2454	HeiDou6	G.max	Landrace	China	HeBei	114.26E	38.03N	HR
575	16NF2457_2458	HeiDou7	G.max	Landrace	China	HeBei	114.26E	38.03N	HR
576	16NF2461_2462	MouPingPingDingHuang	G.max	Improved_cultivar	China	ShanDong	120.18E	36.03N	HR
577	16NF2465_2466	QiHuang10Hao	G.max	Improved_cultivar	China	ShanDong	120.18E	36.03N	HR
578	16NF2469_2470	JuXuan23	G.max	Improved_cultivar	China	ShanDong	120.18E	36.03N	HR
579	16NF2481_2482	QiYueMang	G.max	Landrace	China	ShanDong	120.18E	36.03N	HR
580	16NF2483_2484	PingDingHuang1	G.max	Landrace	China	ShanDong	120.18E	36.03N	HR
581	16NF2485_2486	PingDingHuang2	G.max	Landrace	China	ShanDong	120.18E	36.03N	HR
582	16NF2513_2514	WanShuPingDingHuang	G.max	Landrace	China	ShanDong	120.18E	36.03N	HR
583	16NF2523_2524	DaLiFengBi	G.max	Landrace	China	ShanDong	120.18E	36.03N	HR
584	16NF2525_2526	SiLiQing	G.max	Landrace	China	ShanDong	120.18E	36.03N	HR
585	16NF2527_2528	JiangNanQing	G.max	Landrace	China	ShanDong	120.18E	36.03N	HR
586	16NF2531_2532	XiaoHeiDou24	G.max	Landrace	China	ShanDong	120.18E	36.03N	HR
587	16NF2537_2538	HeiJiaZi	G.max	Landrace	China	ShanDong	120.18E	36.03N	HR
588	16NF2545_2546	SiLiuQiHeiDou	G.max	Landrace	China	ShanDong	120.18E	36.03N	HR
589	16NF2547_2548	HongYouDou	G.max	Landrace	China	ShanDong	120.18E	36.03N	HR
590	16NF2551_2552	HongDou2	G.max	Landrace	China	ShanDong	120.18E	36.03N	HR
591	16NF2553_2554	ChaDou3	G.max	Landrace	China	ShanDong	120.18E	36.03N	HR
592	16NF2573_2574	ChangYuanXiaoTian'eDan	G.max	Landrace	China	HeNan	113.40E	34.46N	HR
593	16NF2593_2594	ChenLiuNiuMaoHuang	G.max	Landrace	China	HeNan	113.40E	34.46N	HR
594	16NF2597_2598	HengChuanTian'eDan	G.max	Landrace	China	HeNan	113.40E	34.46N	HR
595	16NF2599_2600	LuoShanTian'eDan	G.max	Landrace	China	HeNan	113.40E	34.46N	HR
596	16NF2601_2602	DanChengDaLiHuang	G.max	Landrace	China	HeNan	113.40E	34.46N	HR
597	16NF2607_2608	QinYangShuiDou	G.max	Landrace	China	HeNan	113.40E	34.46N	HR
598	16NF2629_2630	ShangQiuDaZiHeiDou	G.max	Landrace	China	HeNan	113.40E	34.46N	HR
599	16NF2653_2654	BaiGunDou	G.max	Landrace	China	ShaanXi	108.55E	34.15N	HR
600	16NF2659_2660	HeiDou8	G.max	Landrace	China	ShaanXi	108.55E	34.15N	HR
601	16NF2663_2664	XiNong509	G.max	Landrace	China	ShaanXi	108.55E	34.15N	HR
602	16NF2665_2666	LaoShuPi1	G.max	Landrace	China	ShaanXi	108.55E	34.15N	HR
603	16NF2667_2668	BaYueZha	G.max	Landrace	China	ShaanXi	108.55E	34.15N	HR
604	16NF2681_2682	DongHaiBaiHuaCaoJia	G.max	Landrace	China	JiangSu	118.75E	32.04N	HR
605	16NF2687_2688	GuanYunHongMaoYouBing	G.max	Landrace	China	JiangSu	118.75E	32.04N	HR
606	16NF2695_2696	FengXianNiuMaoHuang	G.max	Landrace	China	JiangSu	118.75E	32.04N	HR
607	16NF2699_2700	TongShanPingDingWu	G.max	Landrace	China	JiangSu	118.75E	32.04N	HR
608	16NF2719_2720	LianShuiTian'eDan	G.max	Landrace	China	JiangSu	118.75E	32.04N	HR
609	16NF2743_2744	KeFeng6Hao	G.max	Improved_cultivar	China	BeiJing	116.28E	39.54N	HR
610	16NF2747_2748	HuangDou8	G.max	Landrace	China	HeBei	114.26E	38.03N	HR
611	16NF2755_2756	HeiDou	G.max	Landrace	China	HeBei	114.26E	38.03N	HR
612	16NF2763_2764	HeiDou	G.max	Landrace	China	HeBei	114.26E	38.03N	HR
613	16NF2765_2766	DaHeiDou	G.max	Landrace	China	HeBei	114.26E	38.03N	HR
614	16NF2767_2768	DaHeiDou	G.max	Landrace	China	HeBei	114.26E	38.03N	HR
615	16NF2769_2770	XiaoHeiDou	G.max	Landrace	China	HeBei	114.26E	38.03N	HR
616	16NF2771_2772	HeiDou	G.max	Landrace	China	HeBei	114.26E	38.03N	HR
617	16NF2773_2774	XiaoHeiDou16	G.max	Landrace	China	HeBei	114.26E	38.03N	HR
618	16NF2775_2776	YuanHeiDou	G.max	Landrace	China	HeBei	114.26E	38.03N	HR
619	16NF2777_2778	SijiaoQiHeiDou	G.max	Landrace	China	HeBei	114.26E	38.03N	HR
620	16NF2781_2782	BaYueMang	G.max	Landrace	China	HeBei	114.26E	38.03N	HR
621	16NF2783_2784	DaHeiDou11	G.max	Landrace	China	HeBei	114.26E	38.03N	HR
622	16NF2787_2788	XiaoHeiDou5	G.max	Landrace	China	HeBei	114.26E	38.03N	HR
623	16NF2791_2792	JiangSeDou1	G.max	Landrace	China	HeBei	114.26E	38.03N	HR
624	16NF2793_2794	HongDou1	G.max	Landrace	China	HeBei	114.26E	38.03N	HR
625	16NF2797_2798	LuDouErHao	G.max	Improved_cultivar	China	ShanDong	120.18E	36.03N	HR
626	16NF2801_2802	YueJinWuHao	G.max	Improved_cultivar	China	ShanDong	120.18E	36.03N	HR
627	16NF2805_2806	XiaoLanHua	G.max	Landrace	China	ShanDong	120.18E	36.03N	HR
628	16NF2807_2808	YaoJiaoHuang2	G.max	Landrace	China	ShanDong	120.18E	36.03N	HR
629	16NF2811_2812	DaDou1	G.max	Landrace	China	ShanDong	120.18E	36.03N	HR
630	16NF2837_2838	BaiYouDou	G.max	Landrace	China	ShaanXi	108.55E	34.15N	HR
631	16NF2851_2852	NiuPiHuangDou	G.max	Landrace	China	ShaanXi	108.55E	34.15N	HR
632	16NF2853_2854	HuangHuaZao	G.max	Landrace	China	ShaanXi	108.55E	34.15N	HR
633	16NF2859_2860	BaYueZha3	G.max	Landrace	China	ShaanXi	108.55E	34.15N	HR
634	16NF2861_2862	HeiGunHuangDou	G.max	Landrace	China	ShaanXi	108.55E	34.15N	HR
635	16NF2863_2864	HeiDou9	G.max	Landrace	China	ShaanXi	108.55E	34.15N	HR
636	16NF2869_2870	HongPiDaDou1	G.max	Landrace	China	ShaanXi	108.55E	34.15N	HR
637	16NF2875_2876	HongHuangDou3	G.max	Landrace	China	ShaanXi	108.55E	34.15N	HR
638	16NF2879_2880	LaoYeDou	G.max	Landrace	China	ShaanXi	108.55E	34.15N	HR
639	16NF2881_2882	HuPiDou5	G.max	Landrace	China	ShaanXi	108.55E	34.15N	HR
640	16NF2883_2884	ZhenZhuAi	G.max	Landrace	China	GanSu	103.50E	36.03N	HR
641	16NF2889_2890	MaHuangDou	G.max	Landrace	China	GanSu	103.50E	36.03N	HR
642	16NF2897_2898	SuiXiBaiHuaCao	G.max	Landrace	China	AnHui	117.17E	31.52N	HR
643	16NF2899_2900	TaiHeYuanGunZhu	G.max	Landrace	China	AnHui	117.17E	31.52N	HR
644	16NF2905_2906	MengChengBaiJianKe	G.max	Landrace	China	AnHui	117.17E	31.52N	HR
645	16NF2907_2908	ChuXianDaBaiKe	G.max	Landrace	China	AnHui	117.17E	31.52N	HR
646	16NF2909_2910	DangShanDaCanKe	G.max	Landrace	China	AnHui	117.17E	31.52N	HR
647	16NF2925_2926	JiDou4Hao	G.max	Improved_cultivar	China	HeBei	114.26E	38.03N	HR
648	16NF2929_2930	BeiShuiQuanXiangHuangDou	G.max	Landrace	China	HeBei	114.26E	38.03N	HR
649	16NF2959_2960	ShuiLangPi	G.max	Landrace	China	ShanDong	120.18E	36.03N	HR
650	16NF2969_2970	BaiJiaZi	G.max	Landrace	China	ShanDong	120.18E	36.03N	HR
651	16NF2981_2982	8588	G.max	Improved_cultivar	China	ShanDong	120.18E	36.03N	HR
652	16NF2983_2984	YanHuangSiHao	G.max	Improved_cultivar	China	ShanDong	120.18E	36.03N	HR
653	16NF2985_2986	Wei8640-112(LuDou11)	G.max	Improved_cultivar	China	ShanDong	120.18E	36.03N	HR
654	16NF2989_2990	YuDou11	G.max	Improved_cultivar	China	HeNan	113.40E	34.46N	HR
655	16NF2993_2994	Zheng492(YuDou22)	G.max	Improved_cultivar	China	HeNan	113.40E	34.46N	HR
656	16NF2997_2998	HuiLaoShuPi	G.max	Landrace	China	ShaanXi	108.55E	34.15N	HR
657	16NF3013_3014	ChuXiu	G.max	Improved_cultivar	China	JiangSu	118.75E	32.04N	HR
658	16NF3021_3022	ChaPiDou	G.max	Landrace	China	AnHui	117.17E	31.52N	HR
659	16NF3027_3028	DaShuangQing	G.max	Landrace	China	AnHui	117.17E	31.52N	HR
660	16NF3459_3460	XiangChunDou10	G.max	Improved_cultivar	China	HuNan	112.59E	28.12N	SR
661	16NF3465_3466	NanNong99-10	G.max	Improved_cultivar	China	JiangSu	118.75E	32.04N	HR
662	16NF3495_3496	WanDou35	G.max	Improved_cultivar	China	AnHui	117.17E	31.52N	HR
663	16NF3497_3498	NanNong99-6	G.max	Improved_cultivar	China	JiangSu	118.75E	32.04N	HR
664	16NF3695_3696	XinLiuQing	G.max	Improved_cultivar	China	AnHui	117.17E	31.52N	HR
665	16NF4419	ShengLi3Hao	G.max	Landrace	China	ShanDong	120.18E	36.03N	HR
666	16NF4420	BaYueMang2	G.max	Landrace	China	ShanDong	120.18E	36.03N	HR
667	16NF4421	BaiHuaCao	G.max	Landrace	China	ShanDong	120.18E	36.03N	HR
668	16NF4422	SiLiYuan	G.max	Landrace	China	ShanDong	120.18E	36.03N	HR
669	16NF4423	DaHuangDou2	G.max	Landrace	China	ShanDong	120.18E	36.03N	HR
670	16NF4426	FangChengCaoHuangDou	G.max	Landrace	China	HeNan	113.40E	34.46N	HR
671	16NF4454	ZhuaZiTuiHuangDou	G.max	Landrace	China	HeBei	114.26E	38.03N	HR
672	16NF4457	XinLeiTouChaDou	G.max	Landrace	China	HeBei	114.26E	38.03N	HR
673	16NF4472	PingDingHuang7	G.max	Landrace	China	ShanDong	120.18E	36.03N	HR
674	16NF4477	ChaDou2	G.max	Landrace	China	ShanDong	120.18E	36.03N	HR
675	16NF4480	LuoNingHuangJiaoHeiDaDou	G.max	Landrace	China	HeNan	113.40E	34.46N	HR
676	16NF4483	JiDou7Hao	G.max	Improved_cultivar	China	HeBei	114.26E	38.03N	HR
677	16NF4484	LvShunDou	G.max	Landrace	China	ShanDong	120.18E	36.03N	HR
678	16NF4485	DaHeiDou	G.max	Landrace	China	ShanDong	120.18E	36.03N	HR
679	16NF4506	GaoZuoXuan1Hao	G.max	Improved_cultivar	China	ShanDong	120.18E	36.03N	HR
680	16NF4532	BaYueZao	G.max	Landrace	China	ShaanXi	108.55E	34.15N	HR
681	16NF4533	DaLaoShuPi	G.max	Landrace	China	ShaanXi	108.55E	34.15N	HR
682	16NF4572	Zheng84240-B1	G.max	Improved_cultivar	China	HeNan	113.40E	34.46N	HR
683	16NF4580	DaLiHeiDou3	G.max	Landrace	China	ShanDong	120.18E	36.03N	HR
684	16NF4581	ZhaDou	G.max	Landrace	China	ShanDong	120.18E	36.03N	HR
685	16NF4582	ZhongHuang4	G.max	Improved_cultivar	China	BeiJing	116.28E	39.54N	HR
686	16NF4603	ZhongDou32	G.max	Improved_cultivar	China	HuBei	115.32E	30.52N	SR
687	16NF4630_4631	Zheng8516	G.max	Improved_cultivar	China	HeNan	113.40E	34.46N	HR
688	16NF4648_4649	GunLongZhu	G.max	Landrace	China	ShanDong	120.18E	36.03N	HR
689	16NF4711	LuDouSiHao	G.max	Improved_cultivar	China	ShanDong	120.18E	36.03N	HR
690	16NF4712	YanHuang3Hao	G.max	Improved_cultivar	China	ShanDong	120.18E	36.03N	HR
691	16NF93_94	A-66jia	G.max	Improved_cultivar	Tailand	NA	100.31E	13.45N	WDD_SR
692	16NF2391_2392	ZheXian4Hao	G.max	Improved_cultivar	China	ZheJiang	120.10E	30.15N	SR
693	16NF2397_2398	ZheXian5Hao	G.max	Improved_cultivar	China	ZheJiang	120.10E	30.15N	SR
694	16NF3035_3036	LiuHeHongMaoQingJia	G.max	Landrace	China	JiangSu	118.75E	32.04N	SR
695	16NF3047_3048	NanTongHuangYouGuoZi	G.max	Landrace	China	JiangSu	118.75E	32.04N	SR
696	16NF3049_3050	WuChangLiuYueBao	G.max	Landrace	China	HuBei	115.32E	30.52N	SR
697	16NF3055_3056	LeiBaDou	G.max	Landrace	China	HuBei	115.32E	30.52N	SR
698	16NF3061_3062	LuXianTiePiDou	G.max	Landrace	China	SiChuan	104.06E	30.67N	SR
699	16NF3075_3076	XiangDou3Hao	G.max	Improved_cultivar	China	HuNan	112.59E	28.12N	SR
700	16NF3087_3088	TianBaDou	G.max	Landrace	China	SiChuan	104.06E	30.67N	SR
701	16NF3091_3092	HuangMaoMao	G.max	Landrace	China	SiChuan	104.06E	30.67N	SR
702	16NF3099_3100	LinShuiDongDou	G.max	Landrace	China	SiChuan	104.06E	30.67N	SR
703	16NF3111_3112	BaoXingJingDeHuang	G.max	Landrace	China	SiChuan	104.06E	30.67N	SR
704	16NF3121_3122	SiChuanQingPiDou	G.max	Landrace	China	SiChuan	104.06E	30.67N	SR
705	16NF3123_3124	PengXiLiuYueHuang	G.max	Landrace	China	SiChuan	104.06E	30.67N	SR
706	16NF3127_3128	LongChangDaHeiDou	G.max	Landrace	China	SiChuan	104.06E	30.67N	SR
707	16NF3169_3170	QingPiDou1	G.max	Landrace	China	SiChuan	104.06E	30.67N	SR
708	16NF3177_3178	HongHuangDou2	G.max	Landrace	China	SiChuan	104.06E	30.67N	SR
709	16NF3181_3182	ZiDou	G.max	Landrace	China	ZheJiang	120.10E	30.15N	SR
710	16NF3203_3204	YouXianHeDou	G.max	Landrace	China	HuNan	112.59E	28.12N	SR
711	16NF3205_3206	LianYuanHuPiDou	G.max	Landrace	China	HuNan	112.59E	28.12N	SR
712	16NF3211_3212	GuiChiNiuMaoHuang	G.max	Landrace	China	AnHui	117.17E	31.52N	SR
713	16NF3213_3214	LiuYueBao	G.max	Landrace	China	AnHui	117.17E	31.52N	SR
714	16NF3219_3220	XiDou3Hao	G.max	Improved_cultivar	China	SiChuan	104.06E	30.67N	SR
715	16NF3227_3228	DaHuangMao	G.max	Landrace	China	SiChuan	104.06E	30.67N	SR
716	16NF3229_3230	BenDiHuangDou	G.max	Landrace	China	SiChuan	104.06E	30.67N	SR
717	16NF3231_3232	HeiDouZi1	G.max	Landrace	China	SiChuan	104.06E	30.67N	SR
718	16NF3251_3252	KaiXianHeiZaoDou	G.max	Landrace	China	SiChuan	104.06E	30.67N	SR
719	16NF3253_3254	PengXianHeiPiDou	G.max	Landrace	China	SiChuan	104.06E	30.67N	SR
720	16NF3255_3256	YouYangDaHeiDou	G.max	Landrace	China	SiChuan	104.06E	30.67N	SR
721	16NF3259_3260	ZheChun3Hao	G.max	Improved_cultivar	China	ZheJiang	120.10E	30.15N	SR
722	16NF3261_3262	JiangXiDou	G.max	Landrace	China	ZheJiang	120.10E	30.15N	SR
723	16NF3275_3276	GaoQiaoHeDou2	G.max	Landrace	China	HuNan	112.59E	28.12N	SR
724	16NF3279_3280	GuTianDou	G.max	Landrace	China	FuJian	118.04E	24.26N	SR
725	16NF3283_3284	DaPuDou	G.max	Landrace	China	FuJian	118.04E	24.26N	SR
726	16NF3297_3298	HeiKeDou	G.max	Landrace	China	GuiZhou	106.72E	26.57N	SR
727	16NF3299_3300	MaoJiHui	G.max	Landrace	China	GuiZhou	106.72E	26.57N	SR
728	16NF3301_3302	BaiMaoDou3	G.max	Landrace	China	GuiZhou	106.72E	26.57N	SR
729	16NF3311_3312	DouYaDou	G.max	Landrace	China	GuiZhou	106.72E	26.57N	SR
730	16NF3313_3314	QiChuanDou	G.max	Landrace	China	GuiZhou	106.72E	26.57N	SR
731	16NF3315_3316	LiuYueZaoHuangDou	G.max	Landrace	China	GuiZhou	106.72E	26.57N	SR
732	16NF3321_3322	HuaLianDou1	G.max	Landrace	China	GuiZhou	106.72E	26.57N	SR
733	16NF3333_3334	HuaMaoDou	G.max	Landrace	China	FuJian	118.04E	24.26N	SR
734	16NF3341_3342	XiHuangDou-15	G.max	Landrace	China	GuiZhou	106.72E	26.57N	SR
735	16NF3347_3348	DaBaiShuiDou-2	G.max	Landrace	China	GuiZhou	106.72E	26.57N	SR
736	16NF3355_3356	DaBaiShuiDou2	G.max	Landrace	China	GuiZhou	106.72E	26.57N	SR
737	16NF3363_3364	HuangMaoDou-3	G.max	Landrace	China	GuiZhou	106.72E	26.57N	SR
738	16NF3365_3366	BaoGuHuang-8	G.max	Landrace	China	GuiZhou	106.72E	26.57N	SR
739	16NF3393_3394	LuoDingQingDou	G.max	Landrace	China	GuangDong	113.18E	23.10N	SR
740	16NF3399_3400	ChaShanHeiDou	G.max	Landrace	China	GuangDong	113.18E	23.10N	SR
741	16NF3405_3406	QiongHaiHeiDou	G.max	Landrace	China	HaiNan	111.10E	20.03N	SR
742	16NF3417_3418	TianLinPingTangZaoHuangDou	G.max	Landrace	China	GuangXi	108.21E	22.47N	SR
743	16NF3423_3424	HeiDou17	G.max	Landrace	China	GuangXi	108.21E	22.47N	SR
744	16NF3441_3442	HongXingDaGeWu	G.max	Landrace	China	GuangDong	113.18E	23.10N	SR
745	16NF3449_3450	GongDou10Hao	G.max	Improved_cultivar	China	SiChuan	104.06E	30.67N	SR
746	16NF3451_3452	TaiWan75(Lv75)	G.max	Improved_cultivar	China	TaiWan	121.31E	25.02N	SR
747	16NF3489_3490	GanDou2Hao	G.max	Improved_cultivar	China	JiangXi	115.53E	28.42N	SR
748	16NF3491_3492	GuiZao1Hao	G.max	Improved_cultivar	China	GuangXi	108.21E	22.47N	SR
749	16NF3519_3520	XiangChunDou26	G.max	Improved_cultivar	China	HuNan	112.59E	28.12N	SR
750	16NF3523_3524	ChunHua5Hao	G.max	Improved_cultivar	China	JiangSu	118.75E	32.04N	SR
751	16NF3537_3538	Hai'AnCiYuDou1	G.max	Landrace	China	JiangSu	118.75E	32.04N	SR
752	16NF3555_3556	RuDongWanLvHuangDouJia	G.max	Landrace	China	JiangSu	118.75E	32.04N	SR
753	16NF3563_3564	ShaZhouDanHuangDou	G.max	Landrace	China	JiangSu	118.75E	32.04N	SR
754	16NF3573_3574	QingPi3	G.max	Landrace	China	AnHui	117.17E	31.52N	SR
755	16NF3585_3586	FengXianHuiDaoHuang	G.max	Landrace	China	ShangHai	121.43E	34.50N	SR
756	16NF3587_3588	E'Dou2Hao	G.max	Improved_cultivar	China	HuBei	115.32E	30.52N	SR
757	16NF3589_3590	TianMenDaZiHuang	G.max	Landrace	China	HuBei	115.32E	30.52N	SR
758	16NF3591_3592	XiangYangBaYueZha	G.max	Landrace	China	HuBei	115.32E	30.52N	SR
759	16NF3613_3614	XiaoGanDou	G.max	Landrace	China	HuBei	115.32E	30.52N	SR
760	16NF3617_3618	YingShanDaLiHuang	G.max	Landrace	China	HuBei	115.32E	30.52N	SR
761	16NF3621_3622	HuangBeiShanZiBai	G.max	Landrace	China	HuBei	115.32E	30.52N	SR
762	16NF3623_3624	JingMenShuHouZi	G.max	Landrace	China	HuBei	115.32E	30.52N	SR
763	16NF3629_3630	AnLuHeiHuangDou	G.max	Landrace	China	HuBei	115.32E	30.52N	SR
764	16NF3631_3632	TongShanDaLiJiangPiHuang	G.max	Landrace	China	HuBei	115.32E	30.52N	SR
765	16NF3635_3636	JingShanBu'AoDou	G.max	Landrace	China	HuBei	115.32E	30.52N	SR
766	16NF3639_3640	YouDou	G.max	Landrace	China	ZheJiang	120.10E	30.15N	SR
767	16NF3651_3652	LiuYueBai	G.max	Landrace	China	ZheJiang	120.10E	30.15N	SR
768	16NF3667_3668	JiuYueBa	G.max	Landrace	China	ZheJiang	120.10E	30.15N	SR
769	16NF3669_3670	QingKeDou	G.max	Landrace	China	ZheJiang	120.10E	30.15N	SR
770	16NF3671_3672	QingPiDou9	G.max	Landrace	China	ZheJiang	120.10E	30.15N	SR
771	16NF3673_3674	HeiDaDou2	G.max	Landrace	China	ZheJiang	120.10E	30.15N	SR
772	16NF3675_3676	WuDaDou	G.max	Landrace	China	ZheJiang	120.10E	30.15N	SR
773	16NF3689_3690	XingHuaMaoJiaDouJia	G.max	Landrace	China	JiangSu	118.75E	32.04N	SR
774	16NF3697_3698	ZaoHongDou	G.max	Landrace	China	ShangHai	121.43E	34.50N	SR
775	16NF3703_3704	82-16	G.max	Improved_cultivar	China	HuBei	115.32E	30.52N	SR
776	16NF3705_3706	74-424	G.max	Improved_cultivar	China	HuBei	115.32E	30.52N	SR
777	16NF3709_3710	JingDou26	G.max	Landrace	China	HuBei	115.32E	30.52N	SR
778	16NF3717_3718	HouWeiLie2	G.max	Landrace	China	HuBei	115.32E	30.52N	SR
779	16NF3729_3730	ChiHuangDou1	G.max	Landrace	China	HuBei	115.32E	30.52N	SR
780	16NF3733_3734	JiuYueHan	G.max	Landrace	China	HuBei	115.32E	30.52N	SR
781	16NF3737_3738	HeiHuangDou2	G.max	Landrace	China	HuBei	115.32E	30.52N	SR
782	16NF3743_3744	HeiNiDou	G.max	Landrace	China	HuBei	115.32E	30.52N	SR
783	16NF3745_3746	LvKeDou	G.max	Landrace	China	HuBei	115.32E	30.52N	SR
784	16NF3749_3750	JiuYueBao	G.max	Landrace	China	HuBei	115.32E	30.52N	SR
785	16NF3755_3756	ZhuanJinLou	G.max	Landrace	China	HuBei	115.32E	30.52N	SR
786	16NF3757_3758	DaHuaDou	G.max	Landrace	China	SiChuan	104.06E	30.67N	SR
787	16NF3791_3792	ChengNanZaoDou-2	G.max	Landrace	China	SiChuan	104.06E	30.67N	SR
788	16NF3803_3804	LiuYueHuang2	G.max	Landrace	China	SiChuan	104.06E	30.67N	SR
789	16NF3805_3806	GuanGeXiaoDongDou	G.max	Landrace	China	SiChuan	104.06E	30.67N	SR
790	16NF3809_3810	BaiShuiDou2	G.max	Landrace	China	SiChuan	104.06E	30.67N	SR
791	16NF3821_3822	ZaoHuangDou-2	G.max	Landrace	China	SiChuan	104.06E	30.67N	SR
792	16NF3825_3826	LvDouZi	G.max	Landrace	China	SiChuan	104.06E	30.67N	SR
793	16NF3827_3828	QingPiDou2	G.max	Landrace	China	SiChuan	104.06E	30.67N	SR
794	16NF3829_3830	GaoShanDou	G.max	Landrace	China	SiChuan	104.06E	30.67N	SR
795	16NF3833_3834	HeiDouZi2	G.max	Landrace	China	SiChuan	104.06E	30.67N	SR
796	16NF3835_3836	XiaoHeiDou19	G.max	Landrace	China	SiChuan	104.06E	30.67N	SR
797	16NF3837_3838	HeiYaoDou	G.max	Landrace	China	SiChuan	104.06E	30.67N	SR
798	16NF3851_3852	HeShaoChaDou	G.max	Landrace	China	SiChuan	104.06E	30.67N	SR
799	16NF3853_3854	BianZiJiangSeDou	G.max	Landrace	China	SiChuan	104.06E	30.67N	SR
800	16NF3855_3856	HuaDaDou	G.max	Landrace	China	SiChuan	104.06E	30.67N	SR
801	16NF3857_3858	HuaLianDou2	G.max	Landrace	China	SiChuan	104.06E	30.67N	SR
802	16NF3891_3892	ShiMenDaBaiLi	G.max	Landrace	China	HuNan	112.59E	28.12N	SR
803	16NF3893_3894	QianJiaZhouHuangDou	G.max	Landrace	China	HuNan	112.59E	28.12N	SR
804	16NF3899_3900	JinNanHuangDou	G.max	Landrace	China	HuNan	112.59E	28.12N	SR
805	16NF3901_3902	SuiNingBaYueHuang<Yi>	G.max	Landrace	China	HuNan	112.59E	28.12N	SR
806	16NF3909_3910	LongShanHeiPiDou	G.max	Landrace	China	HuNan	112.59E	28.12N	SR
807	16NF3911_3912	XinHuangHeiDou	G.max	Landrace	China	HuNan	112.59E	28.12N	SR
808	16NF3913_3914	JunShanDaQingDou	G.max	Landrace	China	HuNan	112.59E	28.12N	SR
809	16NF3915_3916	BaoJingChaHuangDou	G.max	Landrace	China	HuNan	112.59E	28.12N	SR
810	16NF3917_3918	ShaShiHeNanDou	G.max	Landrace	China	HuNan	112.59E	28.12N	SR
811	16NF3921_3922	ZaoHuangDou-7	G.max	Landrace	China	GuiZhou	106.72E	26.57N	SR
812	16NF3925_3926	BaiDouZi	G.max	Landrace	China	GuiZhou	106.72E	26.57N	SR
813	16NF3927_3928	HuangPiDaDou	G.max	Landrace	China	GuiZhou	106.72E	26.57N	SR
814	16NF3929_3930	QingPiDou5	G.max	Landrace	China	GuiZhou	106.72E	26.57N	SR
815	16NF3931_3932	XiaoHuangDou9	G.max	Landrace	China	GuiZhou	106.72E	26.57N	SR
816	16NF3941_3942	LiuYueMang	G.max	Landrace	China	GuiZhou	106.72E	26.57N	SR
817	16NF3955_3956	ZongZiDou-5	G.max	Landrace	China	GuiZhou	106.72E	26.57N	SR
818	16NF3957_3958	HuangDouZi-4	G.max	Landrace	China	GuiZhou	106.72E	26.57N	SR
819	16NF3959_3960	ZongZiDou	G.max	Landrace	China	GuiZhou	106.72E	26.57N	SR
820	16NF3971_3972	ChunHeiDou	G.max	Landrace	China	GuangDong	113.18E	23.10N	SR
821	16NF3983_3984	77-27	G.max	Landrace	China	GuangXi	108.21E	22.47N	SR
822	16NF3987_3988	FengShanBaYueDou	G.max	Landrace	China	GuangXi	108.21E	22.47N	SR
823	16NF3993_3994	LuoXuPingGuoHuangDou	G.max	Landrace	China	GuangXi	108.21E	22.47N	SR
824	16NF4003_4004	ShangShuHuangDou	G.max	Landrace	China	GuangXi	108.21E	22.47N	SR
825	16NF4007_4008	ShiYaHuang	G.max	Landrace	China	GuangXi	108.21E	22.47N	SR
826	16NF4019_4020	LiuYueHuang1	G.max	Landrace	China	YunNan	102.42E	25.03N	SR
827	16NF4023_4024	SiJiDou	G.max	Landrace	China	YunNan	102.42E	25.03N	SR
828	16NF4025_4026	DaDou2	G.max	Landrace	China	YunNan	102.42E	25.03N	SR
829	16NF4027_4028	DongDaDou	G.max	Landrace	China	YunNan	102.42E	25.03N	SR
830	16NF4049_4050	HeiHuangDou1	G.max	Landrace	China	YunNan	102.42E	25.03N	SR
831	16NF4051_4052	XiaoHeiDou11	G.max	Landrace	China	YunNan	102.42E	25.03N	SR
832	16NF4067_4068	JiuLiXiang	G.max	Landrace	China	JiangSu	118.75E	32.04N	SR
833	16NF4069_4070	LiYangPoPiFeng	G.max	Landrace	China	JiangSu	118.75E	32.04N	SR
834	16NF4071_4072	BaYueHuang4	G.max	Landrace	China	AnHui	117.17E	31.52N	SR
835	16NF4079_4080	FengPiQing	G.max	Landrace	China	AnHui	117.17E	31.52N	SR
836	16NF4081_4082	ChangLinQingDou	G.max	Landrace	China	AnHui	117.17E	31.52N	SR
837	16NF4095_4096	ZhongDou14	G.max	Improved_cultivar	China	HuBei	115.32E	30.52N	SR
838	16NF4099_4100	NiuKenZhuang	G.max	Landrace	China	HuBei	115.32E	30.52N	SR
839	16NF4107_4108	WuHuangDou	G.max	Landrace	China	HuBei	115.32E	30.52N	SR
840	16NF4109_4110	NiBaDou	G.max	Landrace	China	HuBei	115.32E	30.52N	SR
841	16NF4119_4120	BaiHuaHuangPi	G.max	Landrace	China	FuJian	118.04E	24.26N	SR
842	16NF4127_4128	XiaoHuangDou-2	G.max	Landrace	China	FuJian	118.04E	24.26N	SR
843	16NF4139_4140	HeiPiDaDou2	G.max	Landrace	China	FuJian	118.04E	24.26N	SR
844	16NF4141_4142	FengXiWuDouZai	G.max	Landrace	China	FuJian	118.04E	24.26N	SR
845	16NF4143_4144	QiaoShiBaYueHuang	G.max	Landrace	China	HuNan	112.59E	28.12N	SR
846	16NF4145_4146	ChenXiQingPiDou1	G.max	Landrace	China	HuNan	112.59E	28.12N	SR
847	16NF4147_4148	HengYangQingPiDou	G.max	Landrace	China	HuNan	112.59E	28.12N	SR
848	16NF4149_4150	XinQiaoHeiDou	G.max	Landrace	China	HuNan	112.59E	28.12N	SR
849	16NF4153_4154	ZiHuaDongHuangDou	G.max	Landrace	China	HuNan	112.59E	28.12N	SR
850	16NF4155_4156	GuLuoHeDou	G.max	Landrace	China	HuNan	112.59E	28.12N	SR
851	16NF4157_4158	YeZhuHeDou	G.max	Landrace	China	HuNan	112.59E	28.12N	SR
852	16NF4165_4166	LanRenDou-4	G.max	Landrace	China	GuangDong	113.18E	23.10N	SR
853	16NF4171_4172	TaiYuDaQingDou1	G.max	Landrace	China	GuangXi	108.21E	22.47N	SR
854	16NF4173_4174	LiuYueHuang4	G.max	Landrace	China	YunNan	102.42E	25.03N	SR
855	16NF4175_4176	XiaoLvDou	G.max	Landrace	China	YunNan	102.42E	25.03N	SR
856	16NF4179_4180	XiaoHeiDou21	G.max	Landrace	China	YunNan	102.42E	25.03N	SR
857	16NF4181_4182	HeiPiDaDou1	G.max	Landrace	China	YunNan	102.42E	25.03N	SR
858	16NF4191_4192	BaiMaoJian	G.max	Landrace	China	ZheJiang	120.10E	30.15N	SR
859	16NF4197_4198	MaLiaoDou	G.max	Landrace	China	ZheJiang	120.10E	30.15N	SR
860	16NF4209_4210	ZhangPingQingRenWu	G.max	Landrace	China	FuJian	118.04E	24.26N	SR
861	16NF4225_4226	WuGuMaoDou	G.max	Landrace	China	ZheJiang	120.10E	30.15N	SR
862	16NF4227_4228	QingPiDou3	G.max	Landrace	China	ZheJiang	120.10E	30.15N	SR
863	16NF4233_4234	BaiQiu1Hao	G.max	Improved_cultivar	China	FuJian	118.04E	24.26N	SR
864	16NF4235_4236	PingNanChengGuanShanDou	G.max	Landrace	China	FuJian	118.04E	24.26N	SR
865	16NF4241_4242	Gao'AnBaYueHuang	G.max	Landrace	China	JiangXi	115.53E	28.42N	SR
866	16NF4253_4254	JinXiNiuPiDou	G.max	Landrace	China	JiangXi	115.53E	28.42N	SR
867	16NF4259_4260	YiZhangHeGenDou	G.max	Landrace	China	HuNan	112.59E	28.12N	SR
868	16NF4261_4262	HengYangNiDou	G.max	Landrace	China	HuNan	112.59E	28.12N	SR
869	16NF4267_4268	XiZangDaDou5	G.max	Landrace	China	Tibet	91.06E	29.36N	SR
870	16NF4277_4278	MiaoXiaDaDou	G.max	Landrace	China	ZheJiang	120.10E	30.15N	SR
871	16NF4279_4280	HaiNingHuangDou	G.max	Landrace	China	ZheJiang	120.10E	30.15N	SR
872	16NF4285_4286	HuZhenHeiDou	G.max	Landrace	China	ZheJiang	120.10E	30.15N	SR
873	16NF4287_4288	HuangTianYangDou	G.max	Landrace	China	JiangXi	115.53E	28.42N	SR
874	16NF4293_4294	JiShuiDaLiChaDou	G.max	Landrace	China	JiangXi	115.53E	28.42N	SR
875	16NF4488	BaiMaoDou2	G.max	Landrace	China	GuiZhou	106.72E	26.57N	SR
876	16NF4489	LiuYueZao-1	G.max	Landrace	China	SiChuan	104.06E	30.67N	SR
877	16NF4490	PuDou451	G.max	Improved_cultivar	China	FuJian	118.04E	24.26N	SR
878	16NF4491	ErJiZaoDou-2	G.max	Landrace	China	GuiZhou	106.72E	26.57N	SR
879	16NF4556	XinYiHeiDou	G.max	Landrace	China	GuangDong	113.18E	23.10N	SR
880	16NF4559	TaiXingHeiDou	G.max	Landrace	China	JiangSu	118.75E	32.04N	SR
881	16NF4585	ZaoHuangDou-1	G.max	Landrace	China	SiChuan	104.06E	30.67N	SR
882	16NF4591	XiHuangDou-8	G.max	Landrace	China	GuiZhou	106.72E	26.57N	SR
883	16NF4595	QiYueHuang-1	G.max	Landrace	China	GuiZhou	106.72E	26.57N	SR
884	16NF4624_4625	QuanBian11	G.max	Improved_cultivar	China	FuJian	118.04E	24.26N	SR
885	16NF4664_4665	DaQingRen	G.max	Improved_cultivar	China	FuJian	118.04E	24.26N	SR
886	16NF4668_4669	8307	G.max	Improved_cultivar	China	SiChuan	104.06E	30.67N	SR
887	16NF3969_3970	FengShunXiaoHeiDou	G.max	Landrace	China	GuangDong	113.18E	23.10N	SR
888	16NF4033_4034	HuangLiDou	G.max	Landrace	China	YunNan	102.42E	25.03N	SR
889	16NF4297_4298	DongZe11	G.max	Improved_cultivar	China	HeiLongJiang	126.64E	45.76N	NR
890	16NF4725	MN0201	G.max	Improved_cultivar	United_States	NA	74.25W	40.69N	WDD_HR
891	16NF4726	Traill	G.max	Improved_cultivar	United_States	North Dakota	100.46W	46.48N	WDD_HR
892	16NF581_582	Surge	G.max	Improved_cultivar	United_States	South Dakota	100.20W	44.42N	WDD_HR
893	16NF4728	Harlon	G.max	Improved_cultivar	United_States	NA	74.25W	40.69N	WDD_HR
894	16NF3741_3742	HeiDaDou4	G.max	Landrace	China	HuBei	115.32E	30.52N	SR
895	16NF4730	Titan	G.max	Improved_cultivar	United_States	Michigan	90.76W	44.92N	WDD_HR
896	16NF4731	Holt	G.max	Improved_cultivar	United_States	Nebraska	104.17W	41.42N	WDD_HR
897	16NF4734	Flint	G.max	Improved_cultivar	United_States	Ohio	84.91W	40.34N	WDD_HR
898	16NF4735	Burlison	G.max	Improved_cultivar	United_States	Illinois	98.46W	47.97N	WDD_HR
899	16NF4736	Athow	G.max	Improved_cultivar	United_States	Indiana	79.15W	40.61N	WDD_HR
900	16NF4737	Zane	G.max	Improved_cultivar	United_States	Ohio	84.91W	40.34N	WDD_HR
901	16NF4739	Saline	G.max	Improved_cultivar	United_States	NA	74.25W	40.69N	WDD_HR
902	16NF4740	NS93-4118	G.max	Improved_cultivar	United_States	NA	74.25W	40.69N	WDD_HR
903	16NF4741	Flyer	G.max	Improved_cultivar	United_States	Ohio	84.91W	40.34N	WDD_HR
904	16NF4742	TN4-94	G.max	Improved_cultivar	United_States	NA	74.25W	40.69N	WDD_HR
905	16NF4744	Holladay	G.max	Improved_cultivar	United_States	NA	74.25W	40.69N	WDD_HR
906	16NF615_616	Rhodes	G.max	Improved_cultivar	United_States	Missouri	96.92W	38.22N	WDD_HR
907	16NF619_620	Dillon	G.max	Improved_cultivar	United_States	South Carolina	83.17W	33.60N	WDD_HR
908	16NF621_622	NC-Roy	G.max	Improved_cultivar	United_States	North Carolina	84.35W	35.10N	WDD_HR
909	16NF623_624	Musen	G.max	Improved_cultivar	United_States	South Carolina	83.17W	33.60N	WDD_HR
910	16NF625_626	Stonewall	G.max	Improved_cultivar	United_States	Alabama	78.23W	43.06N	WDD_HR
911	16NF627_628	Benning	G.max	Improved_cultivar	United_States	Georgia	73.07W	44.44N	WDD_HR
912	QLJ7	DongNong36Hao	G.max	Improved_cultivar	China	HeiLongJiang	126.64E	45.76N	NR
913	Suinong14	SuiNong14	G.max	Improved_cultivar	China	HeiLongJiang	126.64E	45.76N	NR
914	TSZY64	JiYu71	G.max	Improved_cultivar	China	JiLin	125.18E	43.55N	NR
915	Z29	XiaoHeiDou(YingXianXiaoHeiDou)	G.max	Landrace	China	ShanXi	112.33E	37.51N	NR
916	Z36	DaHeiDou8	G.max	Landrace	China	ShanXi	112.33E	37.51N	NR
917	Z39	HeiHeiDou1	G.max	Landrace	China	ShanXi	112.33E	37.51N	NR
918	Z40	DaHeiDou10	G.max	Landrace	China	ShanXi	112.33E	37.51N	NR
919	Z43	XiaoHeiDou22	G.max	Landrace	China	ShanXi	112.33E	37.51N	NR
920	Z44	PingDingXiaoHeiDou	G.max	Landrace	China	ShanXi	112.33E	37.51N	NR
921	Z47	HeiHeiDou2	G.max	Landrace	China	ShanXi	112.33E	37.51N	NR
922	Z51	XiaoHeiDou23	G.max	Landrace	China	ShanXi	112.33E	37.51N	NR
923	Z78	DaiMiDou	G.max	Landrace	China	HuBei	115.32E	30.52N	SR
924	Z95	XiaoLiHeiDou	G.max	Landrace	China	HuBei	115.32E	30.52N	SR
925	Z118	WangZhuangHeiDou	G.max	Landrace	China	ShanXi	112.33E	37.51N	NR
926	Z128	BaYueZhaHeiDou	G.max	Landrace	China	ShanXi	112.33E	37.51N	NR
927	Z131	HongChaDou	G.max	Landrace	China	ShanXi	112.33E	37.51N	NR
928	Z156	KangXian2Hao	G.max	Improved_cultivar	China	HeiLongJiang	126.64E	45.76N	NR
929	Z184	ShiDaDou1Hao	G.max	Improved_cultivar	China	XinJiang	87.36E	43.46N	NR
930	Z188	GongDou7Hao	G.max	Improved_cultivar	China	SiChuan	104.06E	30.67N	SR
931	LYH74	ShaHeHuangDou	G.max	Landrace	China	BeiJing	116.28E	39.54N	NR
932	LYH85	HeHeiDou	G.max	Landrace	China	ShanXi	112.33E	37.51N	NR
933	QLJ57	HeiHe45	G.max	Improved_cultivar	China	HeiLongJiang	126.64E	45.76N	NR
934	QLJ96	DengKe1Hao	G.max	Improved_cultivar	China	NeiMengGu	111.65E	40.82N	NR
935	QLJ146	ZhongDou24(82-14)	G.max	Improved_cultivar	China	HuBei	115.32E	30.52N	SR
936	QLJ148	SiDou2Hao	G.max	Improved_cultivar	China	JiangSu	118.75E	32.04N	HR
937	QLJ159	WanDou28	G.max	Improved_cultivar	China	AnHui	117.17E	31.52N	HR
938	HF37	HeFeng37	G.max	Improved_cultivar	China	HeiLongJiang	126.64E	45.76N	NR
939	16NF195_196	TGX560-3D	G.max	Improved_cultivar	NA	NA	74.25W	40.69N	WDD_HR
940	16NF357_358	Kunitz	G.max	Improved_cultivar	United_States	Illinois	98.46W	47.97N	WDD_HR
941	16NF4588	Foster	G.max	Improved_cultivar	United_States	Florida	92.83W	27.32N	WDD_HR
942	16NF1389_1390	DongNong42	G.max	Improved_cultivar	China	HeiLongJiang	126.64E	45.76N	NR
943	16NF1453	HeFeng41	G.max	Improved_cultivar	China	HeiLongJiang	126.64E	45.76N	NR
944	16NF1455_1456	HeFeng42	G.max	Improved_cultivar	China	HeiLongJiang	126.64E	45.76N	NR
945	16NF1457	HeFeng47	G.max	Improved_cultivar	China	HeiLongJiang	126.64E	45.76N	NR
946	16NF1547_1548	HeFeng50	G.max	Improved_cultivar	China	HeiLongJiang	126.64E	45.76N	NR
947	16NF1549_1550	HeFeng52	G.max	Improved_cultivar	China	HeiLongJiang	126.64E	45.76N	NR
948	16NF1551_1552	HeFeng55	G.max	Improved_cultivar	China	HeiLongJiang	126.64E	45.76N	NR
949	16NF1553_1554	SuiNong26	G.max	Improved_cultivar	China	HeiLongJiang	126.64E	45.76N	NR
950	16NF1555_1556	SuiNong28	G.max	Improved_cultivar	China	HeiLongJiang	126.64E	45.76N	NR
951	16NF2261_2262	ZhongPin661	G.max	Improved_cultivar	China	BeiJing	116.28E	39.54N	HR

## Sheet: Table S2
Table S2 Variety Ecotype Classification
Serial No.	ID	Name	Speices	Type	Country	Province/State	Longitude	Latitude	Structure
1	16NF1_2	N32	G.max	Improved_cultivar	Eastern_Europe	NA	26.10E	44.23N	WDD_Su
2	16NF5_6	N17	G.max	Improved_cultivar	Eastern_Europe	NA	26.10E	44.23N	WDD_Su
3	16NF7_8	N07	G.max	Improved_cultivar	Eastern_Europe	NA	26.10E	44.23N	WDD_Su
4	16NF17_18	Fiskeby 1040-4-2	G.max	Improved_cultivar	Sweden	Ostergotland	15.51E	58.33N	WDD_Su
5	16NF23_24	PI 468903	G.max	Improved_cultivar	China	Jilin	125.18E	43.55N	NESp
6	16NF27_28	Suzuhime	G.max	Improved_cultivar	Japan	NA	139.69E	35.69N	WDD_Su
7	16NF29_30	Proto	G.max	Improved_cultivar	United_States	Minnesota	122.28W	40.40N	WDD_Sp
8	16NF31_32	TBD	G.max	Improved_cultivar	United_States	NA	74.25W	40.69N	WDD_Su
9	16NF33_34	Maple Arrow	G.max	Improved_cultivar	Canada	Ontario	93.71W	48.96N	WDD_Sp
10	16NF35_36	Wilkin	G.max	Improved_cultivar	United_States	Minnesota	122.28W	40.40N	WDD_Sp
11	16NF37_38	Pin-din-guan	G.max	Improved_cultivar	China	NA	116.28E	39.54N	WDD_Su
12	16NF45_46	T307	G.max	Improved_cultivar	United_States	NA	74.25W	40.69N	WDD_Sp
13	16NF53_54	L72-920	G.max	Improved_cultivar	United_States	NA	74.25W	40.69N	WDD_Su
14	16NF55_56	9234	G.max	Improved_cultivar	United_States	NA	74.25W	40.69N	WDD_Su
15	16NF65_66	Kovean	G.max	Improved_cultivar	United_States	NA	74.25W	40.69N	WDD_Su
16	16NF67_68	SOER-3	G.max	Improved_cultivar	Russia	NA	37.35E	55.45N	WDD_Sp
17	16NF69_70	Kirsches Stamm 2008	G.max	Improved_cultivar	Germany	NA	13.2E	52.31N	WDD_Sp
18	16NF73_74	Dekabig	G.max	Improved_cultivar	Italy	NA	12E	42N	WDD_Su
19	16NF75_76	Soja 77180	G.max	Improved_cultivar	Germany	NA	13.2E	52.31N	WDD_Sp
20	16NF79_80	MN1301	G.max	Improved_cultivar	United_States	NA	74.25W	40.69N	WDD_Su
21	16NF81_82	L84-2157	G.max	Improved_cultivar	United_States	NA	74.25W	40.69N	WDD_Sp
22	16NF89_90	LS94-3207	G.max	Improved_cultivar	United_States	Illinois	98.46W	47.97N	WDD_Su
23	16NF95_96	Soja 277180	G.max	Improved_cultivar	Germany	NA	13.2E	52.31N	WDD_Sp
24	16NF101_102	L88-8153	G.max	Improved_cultivar	United_States	NA	74.25W	40.69N	WDD_Sp
25	16NF109_110	Dunn	G.max	Improved_cultivar	United_States	Wisconsin	94.05W	44.82N	WDD_Sp
26	16NF113_114	S01-9391	G.max	Improved_cultivar	United_States	Missouri	96.92W	38.22N	WDD_Su
27	16NF117_118	Syella	G.max	Improved_cultivar	Italy	NA	12E	42N	WDD_Sp
28	16NF121_122	T309	G.max	Improved_cultivar	United_States	NA	74.25W	40.69N	WDD_Sp
29	16NF123_124	T308	G.max	Improved_cultivar	United_States	NA	74.25W	40.69N	WDD_Sp
30	16NF137_138	T280	G.max	Improved_cultivar	United_States	NA	74.25W	40.69N	WDD_Sp
31	16NF153_154	Epps	G.max	Improved_cultivar	United_States	Mississippi	92.12W	32.55N	WDD_Su
32	16NF155_156	PN9394	G.max	Improved_cultivar	United_States	NA	74.25W	40.69N	WDD_Sp
33	16NF157_158	HP202	G.max	Improved_cultivar	United_States	Iowa	93.60W	41.59N	WDD_Sp
34	16NF159_160	Cordell	G.max	Improved_cultivar	United_States	Mississippi	92.12W	32.55N	WDD_Su
35	16NF161_162	Walters	G.max	Improved_cultivar	United_States	Arkansas	91.34W	34.26N	WDD_Su
36	16NF165_166	PR 173-7	G.max	Improved_cultivar	United_States	NA	74.25W	40.69N	WDD_Sp
37	16NF167_168	L65-756	G.max	Improved_cultivar	United_States	NA	74.25W	40.69N	WDD_Sp
38	16NF169_170	Mack	G.max	Improved_cultivar	United_States	NA	74.25W	40.69N	WDD_Su
39	16NF171_172	PI189866	G.max	Landrace	United_States	NA	74.25W	40.69N	WDD_Sp
40	16NF173_174	Asgrow A 1939	G.max	Improved_cultivar	United_States	NA	74.25W	40.69N	WDD_Sp
41	16NF179_180	Conrad	G.max	Improved_cultivar	United_States	Iowa	93.60W	41.59N	WDD_Sp
42	16NF181_182	Narow	G.max	Improved_cultivar	United_States	Arkansas	91.34W	34.26N	WDD_Su
43	16NF187_188	Camp	G.max	Improved_cultivar	United_States	Virginia	83.91W	37.92N	WDD_Su
44	16NF189_190	PR 165-50	G.max	Improved_cultivar	United_States	NA	74.25W	40.69N	WDD_Sp
45	16NF193_194	M044-1	G.max	Improved_cultivar	United_States	NA	74.25W	40.69N	WDD_Su
46	16NF205_206	L73-105	G.max	Improved_cultivar	United_States	NA	74.25W	40.69N	WDD_Sp
47	16NF207_208	Century	G.max	Improved_cultivar	United_States	Indiana	79.15W	40.61N	WDD_Sp
48	16NF209_210	Amcor 89	G.max	Improved_cultivar	United_States	Ohio	84.91W	40.34N	WDD_Sp
49	16NF211_212	PI196160	G.max	Landrace	Japan	NA	139.69E	35.69N	WDD_Sp
50	16NF221_222	Manchu 2204	G.max	Improved_cultivar	United_States	NA	74.25W	40.69N	WDD_Sp
51	16NF223_224	Cloud	G.max	Improved_cultivar	United_States	NA	74.25W	40.69N	WDD_Sp
52	16NF229_230	Beeson	G.max	Improved_cultivar	United_States	Indiana	79.15W	40.61N	WDD_Sp
53	16NF231_232	Provar	G.max	Improved_cultivar	United_States	Iowa	93.60W	41.59N	WDD_Sp
54	16NF233_234	L83-4387（ti）	G.max	Improved_cultivar	United_States	NA	74.25W	40.69N	WDD_Sp
55	16NF237_238	T279	G.max	Improved_cultivar	United_States	NA	74.25W	40.69N	WDD_Sp
56	16NF239_240	Jack	G.max	Improved_cultivar	United_States	Illinois	98.46W	47.97N	WDD_Sp
57	16NF243_244	Vinton 81	G.max	Improved_cultivar	United_States	Iowa	93.60W	41.59N	WDD_Sp
58	16NF245_246	L67-153	G.max	Improved_cultivar	United_States	NA	74.25W	40.69N	WDD_Sp
59	16NF251_252	Sharkey	G.max	Improved_cultivar	United_States	Mississippi	92.12W	32.55N	WDD_Su
60	16NF255_256	Twiggs	G.max	Improved_cultivar	United_States	Georgia	73.07W	44.44N	WDD_Su
61	16NF257_258	Century-lx1.3	G.max	Improved_cultivar	United_States	NA	74.25W	40.69N	WDD_Sp
62	16NF261_262	Corsoy	G.max	Improved_cultivar	United_States	Iowa	93.60W	41.59N	WDD_Sp
63	16NF263_264	Magnolid	G.max	Improved_cultivar	United_States	NA	74.25W	40.69N	WDD_Sp
64	16NF267_268	L89-2435	G.max	Improved_cultivar	United_States	NA	74.25W	40.69N	WDD_Sp
65	16NF271_272	Bryan	G.max	Improved_cultivar	United_States	Georgia	73.07W	44.44N	WDD_Su
66	16NF277_278	GR8836	G.max	Improved_cultivar	United_States	Ohio	84.91W	40.34N	WDD_Sp
67	16NF281_282	A2396	G.max	Improved_cultivar	United_States	Missouri	96.92W	38.22N	WDD_Sp
68	16NF285_286	Pickett	G.max	Improved_cultivar	United_States	North Carolina	84.35W	35.10N	WDD_Su
69	16NF287_288	Ohio	G.max	Improved_cultivar	United_States	NA	74.25W	40.69N	WDD_Sp
70	16NF291_292	Harwood	G.max	Improved_cultivar	Canada	Ontario	93.71W	48.96N	WDD_Sp
71	16NF293_294	C1640	G.max	Improved_cultivar	United_States	NA	74.25W	40.69N	WDD_Sp
72	16NF299_300	Altona	G.max	Improved_cultivar	Canada	Manitoba	104.41W	54.16N	WDD_Sp
73	16NF301_302	DorchsoyB	G.max	Improved_cultivar	United_States	NA	74.25W	40.69N	WDD_Su
74	16NF303_304	L63-2404	G.max	Improved_cultivar	United_States	NA	74.25W	40.69N	WDD_Sp
75	16NF305_306	Tousan 83	G.max	Improved_cultivar	Japan	NA	139.69E	35.69N	WDD_Su
76	16NF307_308	M044	G.max	Improved_cultivar	United_States	NA	74.25W	40.69N	WDD_Su
77	16NF311_312	M045	G.max	Improved_cultivar	United_States	NA	74.25W	40.69N	WDD_Su
78	16NF313_314	Tousan kei NA5	G.max	Improved_cultivar	Japan	NA	139.69E	35.69N	WDD_Su
79	16NF317_318	Pharaoh	G.max	Improved_cultivar	United_States	Illinois	98.46W	47.97N	WDD_Sp
80	16NF319_320	Soja 398180	G.max	Improved_cultivar	Germany	NA	13.2E	52.31N	WDD_Sp
81	16NF325_326	AGS162	G.max	Improved_cultivar	Tailand	NA	100.31E	13.45N	WDD_Su
82	16NF327_328	Chustnut	G.max	Improved_cultivar	United_States	NA	74.25W	40.69N	WDD_Sp
83	16NF329_330	Amsoy	G.max	Improved_cultivar	United_States	Iowa	93.60W	41.59N	WDD_Sp
84	16NF335_336	PI82295	G.max	Landrace	South_Korea	Seoul	126.37E	37.28N	WDD_Sp
85	16NF337_338	PI80828-1	G.max	Landrace	Japan	Fukushima	141.01E	37.25N	WDD_Sp
86	16NF341_342	BRS 155	G.max	Improved_cultivar	Brazil	NA	47.56W	15.47S	WDD_Su
87	16NF343_344	BRS 156	G.max	Improved_cultivar	Brazil	NA	47.56W	15.47S	WDD_Su
88	16NF345_346	EMBRAPA 58	G.max	Improved_cultivar	Brazil	NA	47.56W	15.47S	WDD_Su
89	16NF347_348	BRS 132	G.max	Improved_cultivar	Brazil	NA	47.56W	15.47S	WDD_Su
90	16NF349_350	D96-1217	G.max	Improved_cultivar	United_States	Mississippi	92.12W	32.55N	WDD_Su
91	16NF351_352	Sargent	G.max	Improved_cultivar	United_States	North Dakota	100.46W	46.48N	WDD_Su
92	16NF355_356	S99-3181	G.max	Improved_cultivar	United_States	Missouri	96.92W	38.22N	WDD_Su
93	16NF359_360	L81-4590（ti）	G.max	Improved_cultivar	United_States	NA	74.25W	40.69N	WDD_Sp
94	16NF361_362	Nile	G.max	Improved_cultivar	United_States	Illinois	98.46W	47.97N	WDD_Sp
95	16NF363_364	L87-0482	G.max	Improved_cultivar	United_States	NA	74.25W	40.69N	WDD_Sp
96	16NF377_378	L83-570	G.max	Improved_cultivar	United_States	NA	74.25W	40.69N	WDD_Sp
97	16NF379_380	Bedford	G.max	Improved_cultivar	United_States	Tennessee	90.47W	35.75N	WDD_Su
98	16NF387_388	Hobbit	G.max	Improved_cultivar	United_States	Ohio	84.91W	40.34N	WDD_Sp
99	16NF389_390	Prichard	G.max	Improved_cultivar	United_States	Georgia	73.07W	44.44N	WDD_Su
100	16NF391_392	Howard	G.max	Improved_cultivar	United_States	Florida	92.83W	27.32N	WDD_Su
101	16NF393_394	Gordon	G.max	Improved_cultivar	United_States	Georgia	73.07W	44.44N	WDD_Su
102	16NF395_396	T219H	G.max	Improved_cultivar	United_States	NA	74.25W	40.69N	WDD_Sp
103	16NF397_398	Probst	G.max	Improved_cultivar	United_States	Indiana	79.15W	40.61N	WDD_Sp
104	16NF399_400	Mercury	G.max	Improved_cultivar	United_States	Nebraska	104.17W	41.42N	WDD_Sp
105	16NF401_402	Delsoy4900	G.max	Improved_cultivar	United_States	Missouri	96.92W	38.22N	WDD_Sp
106	16NF403_404	L82-1858	G.max	Improved_cultivar	United_States	NA	74.25W	40.69N	WDD_Sp
107	16NF407_408	L83-4744	G.max	Improved_cultivar	United_States	NA	74.25W	40.69N	WDD_Sp
108	16NF411_412	CN 344	G.max	Improved_cultivar	United_States	NA	74.25W	40.69N	WDD_Sp
109	16NF413_414	Thomas	G.max	Improved_cultivar	United_States	Georgia	73.07W	44.44N	WDD_Su
110	16NF415_416	Buckshot 723	G.max	Improved_cultivar	United_States	Louisiana	93.64W	30.92N	WDD_Su
111	16NF417_418	Gnome 85	G.max	Improved_cultivar	United_States	Ohio	84.91W	40.34N	WDD_Sp
112	16NF421_422	L72-1879	G.max	Improved_cultivar	United_States	NA	74.25W	40.69N	WDD_Sp
113	16NF423_424	Williams79	G.max	Improved_cultivar	United_States	Illinois	98.46W	47.97N	WDD_Sp
114	16NF427_428	SRE-D-14A	G.max	Improved_cultivar	United_States	NA	74.25W	40.69N	WDD_Sp
115	16NF431_432	Hobbit87	G.max	Improved_cultivar	United_States	Ohio	84.91W	40.34N	WDD_Sp
116	16NF433_434	Williams	G.max	Improved_cultivar	United_States	Illinois	98.46W	47.97N	WDD_Sp
117	16NF437_438	PI90763	G.max	Improved_cultivar	China	Beijing	116.28E	39.54N	NSp
118	16NF439_440	Odell	G.max	Improved_cultivar	United_States	Nebraska	104.17W	41.42N	WDD_Sp
119	16NF455_456	L65-763	G.max	Improved_cultivar	United_States	NA	74.25W	40.69N	WDD_Sp
120	16NF465_466	Carlin	G.max	Improved_cultivar	United_States	Illinois	98.46W	47.97N	WDD_Sp
121	16NF473_474	L85-1467	G.max	Improved_cultivar	United_States	NA	74.25W	40.69N	WDD_Sp
122	16NF475_476	NiRiLiYa4Hao	G.max	Improved_cultivar	Nigeria	NA	0.37W	8.94N	WDD_Su
123	16NF481_482	Elf	G.max	Improved_cultivar	United_States	Illinois	98.46W	47.97N	WDD_Sp
124	16NF483_484	Franklin	G.max	Improved_cultivar	United_States	Illinois	98.46W	47.97N	WDD_Sp
125	16NF487_488	MT/BRS-63	G.max	Improved_cultivar	Brazil	NA	47.56W	15.47S	WDD_Su
126	16NF489_490	MQT/BR-45	G.max	Improved_cultivar	Brazil	NA	47.56W	15.47S	WDD_Su
127	16NF493_494	Sooty	G.max	Improved_cultivar	China	Zhejiang	120.10E	30.15N	WDD_Sp
128	16NF495_496	Padre	G.max	Improved_cultivar	United_States	Texas	109.09W	30.87N	WDD_Su
129	16NF497_498	Bolivar	G.max	Improved_cultivar	United_States	Mississippi	92.12W	32.55N	WDD_Su
130	16NF499_500	Pyramid	G.max	Improved_cultivar	United_States	Illinois	98.46W	47.97N	WDD_Sp
131	16NF503_504	T171	G.max	Improved_cultivar	United_States	NA	74.25W	40.69N	WDD_Sp
132	16NF509_510	Wilson Five B	G.max	Improved_cultivar	United_States	NA	74.25W	40.69N	WDD_Sp
133	16NF511_512	Wilson Five	G.max	Improved_cultivar	United_States	NA	74.25W	40.69N	WDD_Sp
134	16NF517_518	T221	G.max	Improved_cultivar	United_States	NA	74.25W	40.69N	WDD_Sp
135	16NF521_522	Accomac	G.max	Improved_cultivar	United_States	Virginia	83.91W	37.92N	WDD_Sp
136	16NF523_524	D83-3349	G.max	Improved_cultivar	United_States	NA	74.25W	40.69N	WDD_Sp
137	16NF525_526	PI157440	G.max	Landrace	South_Korea	Kyonggi	127.04E	37.3N	WDD_Sp
138	16NF527_528	Chiquita	G.max	Improved_cultivar	United_States	NA	74.25W	40.69N	WDD_Sp
139	16NF573_574	Yellow Morvel	G.max	Improved_cultivar	United_States	NA	74.25W	40.69N	WDD_Sp
140	16NF645_646	LongHuang1Hao	G.max	Improved_cultivar	China	HeiLongJiang	126.64E	45.76N	NESp
141	16NF1387_1388	HeiSheng101	G.max	Improved_cultivar	China	HeiLongJiang	126.64E	45.76N	NESp
142	16NF1441_1442	Wei J127	G.max	Improved_cultivar	China	ShanDong	120.18E	36.03N	HSu
143	16NF1709_1710	DongSheng1Hao	G.max	Improved_cultivar	China	HeiLongJiang	126.64E	45.76N	NESp
144	16NF1717_1718	DongDa2Hao	G.max	Improved_cultivar	China	HeiLongJiang	126.64E	45.76N	NESp
145	16NF2293_2294	HeDou2Hao(MN413)	G.max	Improved_cultivar	China	AnHui	117.17E	31.52N	HSu
146	16NF2313_2314	ShanNing7Hao	G.max	Improved_cultivar	China	ShanDong	120.18E	36.03N	HSu
147	16NF2315_2316	PuHai10Hao	G.max	Improved_cultivar	China	HeNan	113.40E	34.46N	HSu
148	16NF2317_2318	PuDou206	G.max	Improved_cultivar	China	HeNan	113.40E	34.46N	HSu
149	16NF2393_2394	HanDou5Hao	G.max	Improved_cultivar	China	HeBei	114.26E	38.03N	HSu
150	16NF3455_3456	FuDou310	G.max	Improved_cultivar	China	FuJian	118.04E	24.26N	SSu
151	16NF3467_3468	FuDou9765	G.max	Improved_cultivar	China	AnHui	117.17E	31.52N	HSu
152	16NF3477_3478	ChuanDou4Hao	G.max	Improved_cultivar	China	SiChuan	104.06E	30.67N	SSu
153	16NF3483_3484	NanDou12	G.max	Improved_cultivar	China	SiChuan	104.06E	30.67N	SSu
154	16NF3503_3504	QuXian3Hao	G.max	Improved_cultivar	China	ZheJiang	120.10E	30.15N	SSu
155	16NF3509_3510	QuanDou7Hao	G.max	Improved_cultivar	China	FuJian	118.04E	24.26N	SSu
156	16NF3511_3512	HuaXia9Hao	G.max	Improved_cultivar	China	GuangDong	113.18E	23.10N	SSu
157	16NF3517_3518	DianDou7Hao	G.max	Improved_cultivar	China	YunNan	102.42E	25.03N	SSu
158	16NF4601	HuaiDou4Hao	G.max	Improved_cultivar	China	JiangSu	118.75E	32.04N	HSu
159	16NF4605	ZaoSheng75	G.max	Improved_cultivar	China	ZheJiang	120.10E	30.15N	SSu
160	16NF4698	Dp3480	G.max	Improved_cultivar	United_States	NA	74.25W	40.69N	WDD_Sp
161	16NF425_426	Williams 82	G.max	Improved_cultivar	United_States	Illinois	98.46W	47.97N	WDD_Sp
162	16NF19_20	KPS292(AGS292）	G.max	Improved_cultivar	Japan	NA	139.69E	35.69N	WDD_Sp
163	16NF21_22	G.maxN136	G.max	Improved_cultivar	Russia	NA	37.35E	55.45N	WDD_Sp
164	16NF25_26	OAC Bayfield	G.max	Improved_cultivar	Canada	NA	73.58W	45.20N	WDD_Su
165	16NF39_40	G.max-46	G.max	Improved_cultivar	Russia	NA	37.35E	55.45N	WDD_Sp
166	16NF41_42	BC-14-1-3	G.max	Improved_cultivar	Canada	NA	73.58W	45.20N	WDD_Sp
167	16NF47_48	Chohckuzan	G.max	Improved_cultivar	Japan	NA	139.69E	35.69N	WDD_Su
168	16NF49_50	CHI-LU-SCHU	G.max	Improved_cultivar	Russia	NA	37.35E	55.45N	WDD_Sp
169	16NF57_58	Tsurukogane	G.max	Improved_cultivar	Japan	NA	139.69E	35.69N	WDD_Su
170	16NF61_62	Suzumaru	G.max	Improved_cultivar	Japan	NA	139.69E	35.69N	WDD_Su
171	16NF63_64	MONETA	G.max	Improved_cultivar	Russia	NA	37.35E	55.45N	WDD_Sp
172	16NF83_84	DanLi	G.max	Improved_cultivar	Japan	NA	139.69E	35.69N	WDD_Su
173	16NF85_86	PSB543	G.max	Improved_cultivar	Russia	NA	37.35E	55.45N	WDD_Sp
174	16NF87_88	Yumeyutaka	G.max	Improved_cultivar	Japan	NA	139.69E	35.69N	WDD_Su
175	16NF97_98	GuanDong102	G.max	Improved_cultivar	Japan	NA	139.69E	35.69N	WDD_Su
176	16NF99_100	ZhongTe1Hao	G.max	Improved_cultivar	Japan	NA	139.69E	35.69N	WDD_Su
177	16NF103_104	ДВ 2846	G.max	Improved_cultivar	Russia	NA	37.35E	55.45N	WDD_Sp
178	16NF107_108	WuMing7	G.max	Improved_cultivar	Japan	NA	139.69E	35.69N	WDD_Sp
179	16NF125_126	POLUKULTURNAYA-2	G.max	Improved_cultivar	Russia	NA	37.35E	55.45N	WDD_Sp
180	16NF127_128	C∏1271	G.max	Improved_cultivar	Russia	NA	37.35E	55.45N	WDD_Sp
181	16NF131_132	PSB313	G.max	Improved_cultivar	Russia	NA	37.35E	55.45N	WDD_Sp
182	16NF133_134	PSB609	G.max	Improved_cultivar	Russia	NA	37.35E	55.45N	WDD_Sp
183	16NF149_150	Suwon123	G.max	Improved_cultivar	South_Korea	NA	126.37E	37.28N	WDD_Su
184	16NF177_178	POLUKULTURNAYA-1	G.max	Improved_cultivar	Russia	NA	37.35E	55.45N	WDD_Sp
185	16NF183_184	Japan Ⅰ	G.max	Improved_cultivar	Japan	NA	139.69E	35.69N	WDD_Sp
186	16NF185_186	ブロ－バ	G.max	Improved_cultivar	Japan	NA	139.69E	35.69N	WDD_Sp
187	16NF191_192	Suwon 193	G.max	Improved_cultivar	South_Korea	NA	126.37E	37.28N	WDD_Su
188	16NF219_220	PSB576	G.max	Improved_cultivar	Russia	NA	37.35E	55.45N	WDD_Sp
189	16NF225_226	CA31	G.max	Improved_cultivar	Canada	NA	73.58W	45.20N	WDD_Sp
190	16NF227_228	PSB575	G.max	Improved_cultivar	Russia	NA	37.35E	55.45N	WDD_Sp
191	16NF249_250	CA5	G.max	Improved_cultivar	Canada	NA	73.58W	45.20N	WDD_Sp
192	16NF273_274	カニゾチ	G.max	Improved_cultivar	Japan	NA	139.69E	35.69N	WDD_Sp
193	16NF275_276	WuMing4	G.max	Improved_cultivar	Japan	NA	139.69E	35.69N	WDD_Sp
194	16NF283_284	WuMing5	G.max	Improved_cultivar	Japan	NA	139.69E	35.69N	WDD_Sp
195	16NF289_290	Tokachi nagaha	G.max	Improved_cultivar	Japan	NA	139.69E	35.69N	WDD_Sp
196	16NF295_296	PSB640	G.max	Improved_cultivar	Russia	NA	37.35E	55.45N	WDD_Sp
197	16NF297_298	CHESTNUT	G.max	Improved_cultivar	Russia	NA	37.35E	55.45N	WDD_Sp
198	16NF309_310	CA26	G.max	Improved_cultivar	Canada	NA	73.58W	45.20N	WDD_Sp
199	16NF321_322	Saikai 20	G.max	Improved_cultivar	Japan	NA	139.69E	35.69N	WDD_Sp
200	16NF323_324	WuMing6	G.max	Improved_cultivar	Japan	NA	139.69E	35.69N	WDD_Sp
201	16NF333_334	RiBen54Hao(AiZhiXian)	G.max	Improved_cultivar	Japan	NA	139.69E	35.69N	WDD_Su
202	16NF353_354	PSB471	G.max	Improved_cultivar	Russia	NA	37.35E	55.45N	WDD_Sp
203	16NF371_372	FUN-ZHUN/g	G.max	Improved_cultivar	Russia	NA	37.35E	55.45N	WDD_Sp
204	16NF419_420	ДВ 2849	G.max	Improved_cultivar	Russia	NA	37.35E	55.45N	WDD_Sp
205	16NF479_480	ER-HUAN-YAN	G.max	Improved_cultivar	Russia	NA	37.35E	55.45N	WDD_Sp
206	16NF505_506	Namcheon	G.max	Improved_cultivar	South_Korea	NA	126.37E	37.28N	WDD_Sp
207	16NF529_530	Jangbaeeg	G.max	Improved_cultivar	South_Korea	NA	126.37E	37.28N	WDD_Sp
208	16NF535	YouBiLie	G.max	Improved_cultivar	Russia	NA	37.35E	55.45N	WDD_Sp
209	16NF565_566	Koreane 4	G.max	Improved_cultivar	North_Korea	NA	125.30E	39.01N	WDD_Sp
210	16NF684_685	JiYu47	G.max	Improved_cultivar	China	JiLin	125.18E	43.55N	NESp
211	16NF688_689	JiLinXiLiDou	G.max	Improved_cultivar	China	JiLin	125.18E	43.55N	NESp
212	16NF1005_1006	DongNong4Hao	G.max	Improved_cultivar	China	HeiLongJiang	126.64E	45.76N	NESp
213	16NF1007_1008	FengShou1Hao	G.max	Improved_cultivar	China	HeiLongJiang	126.64E	45.76N	NESp
214	16NF1011_1012	HeiHe3Hao	G.max	Improved_cultivar	China	HeiLongJiang	126.64E	45.76N	NESp
215	16NF1013_1014	HeiHe51	G.max	Improved_cultivar	China	HeiLongJiang	126.64E	45.76N	NESp
216	16NF1015_1016	HeiHe54	G.max	Improved_cultivar	China	HeiLongJiang	126.64E	45.76N	NESp
217	16NF1017_1018	MuFeng1Hao	G.max	Improved_cultivar	China	HeiLongJiang	126.64E	45.76N	NESp
218	16NF1021_1022	ManCangJin1	G.max	Landrace	China	HeiLongJiang	126.64E	45.76N	NESp
219	16NF1025_1026	JingShanPu	G.max	Improved_cultivar	China	HeiLongJiang	126.64E	45.76N	NESp
220	16NF1031_1032	MaoDou1	G.max	Landrace	China	HeiLongJiang	126.64E	45.76N	NESp
221	16NF1035_1036	CaiZhongPu	G.max	Landrace	China	HeiLongJiang	126.64E	45.76N	NESp
222	16NF1039_1040	TuJiaZi	G.max	Landrace	China	HeiLongJiang	126.64E	45.76N	NESp
223	16NF1043_1044	YaPoChe	G.max	Landrace	China	HeiLongJiang	126.64E	45.76N	NESp
224	16NF1047_1048	LiuShiTianHuanJia	G.max	Landrace	China	HeiLongJiang	126.64E	45.76N	NESp
225	16NF1049_1050	HaiLunDuLuDou	G.max	Landrace	China	HeiLongJiang	126.64E	45.76N	NESp
226	16NF1051_1052	XiaoBaiDou1	G.max	Landrace	China	HeiLongJiang	126.64E	45.76N	NESp
227	16NF1053_1054	HuaNanXiaoJinDou	G.max	Landrace	China	HeiLongJiang	126.64E	45.76N	NESp
228	16NF1059_1060	BaoQingLvDaDou	G.max	Landrace	China	HeiLongJiang	126.64E	45.76N	NESp
229	16NF1061_1062	LvPiaoHeiDou	G.max	Landrace	China	HeiLongJiang	126.64E	45.76N	NESp
230	16NF1069_1070	JiLin3Hao	G.max	Improved_cultivar	China	JiLin	125.18E	43.55N	NESp
231	16NF1083_1084	Ha1Hao	G.max	Landrace	China	JiLin	125.18E	43.55N	NESp
232	16NF1085_1086	DaLiHuang1	G.max	Landrace	China	JiLin	125.18E	43.55N	NESp
233	16NF1091_1092	XiaoBaiQi1	G.max	Landrace	China	JiLin	125.18E	43.55N	NESp
234	16NF1093_1094	DaBaiMei1	G.max	Landrace	China	JiLin	125.18E	43.55N	NESp
235	16NF1095_1096	HuiChunDou	G.max	Landrace	China	JiLin	125.18E	43.55N	NESp
236	16NF1099_1100	JiaoHeZiHua1Hao	G.max	Landrace	China	JiLin	125.18E	43.55N	NESp
237	16NF1101_1102	LanQi	G.max	Landrace	China	JiLin	125.18E	43.55N	NESp
238	16NF1105_1106	ShuLanManCangJin	G.max	Landrace	China	JiLin	125.18E	43.55N	NESp
239	16NF1107_1108	YiTongManCangJin	G.max	Landrace	China	JiLin	125.18E	43.55N	NESp
240	16NF1113_1114	DaHongQi	G.max	Landrace	China	JiLin	125.18E	43.55N	NESp
241	16NF1117_1118	QingZaDou	G.max	Landrace	China	JiLin	125.18E	43.55N	NESp
242	16NF1119_1120	HeiDou28	G.max	Landrace	China	JiLin	125.18E	43.55N	NESp
243	16NF1121_1122	HeiDaDou3	G.max	Landrace	China	JiLin	125.18E	43.55N	NESp
244	16NF1127_1128	HeiMoDou	G.max	Landrace	China	JiLin	125.18E	43.55N	NESp
245	16NF1131_1132	TieFeng8Hao	G.max	Improved_cultivar	China	LiaoNing	123.23E	41.48N	NESp
246	16NF1133_1134	TieFeng18	G.max	Improved_cultivar	China	LiaoNing	123.23E	41.48N	NESp
247	16NF1135_1136	JinDou33	G.max	Improved_cultivar	China	LiaoNing	123.23E	41.48N	NESp
248	16NF1147_1148	DaBaiMei2	G.max	Landrace	China	LiaoNing	123.23E	41.48N	NESp
249	16NF1159_1160	HeiQi	G.max	Landrace	China	LiaoNing	123.23E	41.48N	NESp
250	16NF1163_1164	ManDiJin	G.max	Landrace	China	LiaoNing	123.23E	41.48N	NESp
251	16NF1167_1168	TieJiaJinPing	G.max	Landrace	China	LiaoNing	123.23E	41.48N	NESp
252	16NF1171_1172	XiaoBaiQi2	G.max	Landrace	China	LiaoNing	123.23E	41.48N	NESp
253	16NF1189_1190	QingPi1	G.max	Landrace	China	LiaoNing	123.23E	41.48N	NESp
254	16NF1195_1196	QingPiPingDingXiang	G.max	Landrace	China	LiaoNing	123.23E	41.48N	NESp
255	16NF1197_1198	BaiTieJia	G.max	Landrace	China	LiaoNing	123.23E	41.48N	NESp
256	16NF1199_1200	BaiHeiDou	G.max	Landrace	China	LiaoNing	123.23E	41.48N	NESp
257	16NF1203_1204	LiuTiaoQing	G.max	Landrace	China	LiaoNing	123.23E	41.48N	NESp
258	16NF1209_1210	XiaoLiHei	G.max	Landrace	China	LiaoNing	123.23E	41.48N	NESp
259	16NF1215_1216	XiaoLiHeiDou1	G.max	Landrace	China	LiaoNing	123.23E	41.48N	NESp
260	16NF1217_1218	LianMaoHuiHeiDou	G.max	Landrace	China	LiaoNing	123.23E	41.48N	NESp
261	16NF1235_1236	HeiJian1Hao	G.max	Improved_cultivar	China	HeiLongJiang	126.64E	45.76N	NESp
262	16NF1243_1244	HeFeng26Hao	G.max	Improved_cultivar	China	HeiLongJiang	126.64E	45.76N	NESp
263	16NF1245_1246	SuiNong6Hao	G.max	Improved_cultivar	China	HeiLongJiang	126.64E	45.76N	NESp
264	16NF1253_1254	HeQi	G.max	Landrace	China	HeiLongJiang	126.64E	45.76N	NESp
265	16NF1255_1256	SiLiHuang(Nong16-1)	G.max	Landrace	China	HeiLongJiang	126.64E	45.76N	NESp
266	16NF1287_1288	ZhengGuang1Hao	G.max	Improved_cultivar	China	JiLin	125.18E	43.55N	NESp
267	16NF1311_1312	QianGuoHeMao	G.max	Landrace	China	JiLin	125.18E	43.55N	NESp
268	16NF1315_1316	Nong'AnJiangSeDou	G.max	Landrace	China	JiLin	125.18E	43.55N	NESp
269	16NF1317_1318	YongJiZaoDou	G.max	Landrace	China	JiLin	125.18E	43.55N	NESp
270	16NF1327_1328	KaiYuBaHao	G.max	Improved_cultivar	China	LiaoNing	123.23E	41.48N	NESp
271	16NF1333_1334	JinYuanDou	G.max	Landrace	China	LiaoNing	123.23E	41.48N	NESp
272	16NF1335_1336	QingErHei	G.max	Landrace	China	LiaoNing	123.23E	41.48N	NESp
273	16NF1341_1342	HeiHe5Hao	G.max	Improved_cultivar	China	HeiLongJiang	126.64E	45.76N	NESp
274	16NF1343_1344	HeiHe6Hao	G.max	Improved_cultivar	China	HeiLongJiang	126.64E	45.76N	NESp
275	16NF1349_1350	HeiHe9Hao	G.max	Improved_cultivar	China	HeiLongJiang	126.64E	45.76N	NESp
276	16NF1351_1352	HeFeng29Hao	G.max	Improved_cultivar	China	HeiLongJiang	126.64E	45.76N	NESp
277	16NF1353_1354	DongNong47-1C	G.max	Improved_cultivar	China	HeiLongJiang	126.64E	45.76N	NESp
278	16NF1355_1356	HeiHe101	G.max	Improved_cultivar	China	HeiLongJiang	126.64E	45.76N	NESp
279	16NF1363_1364	JiLinXiaoLi1Hao	G.max	Improved_cultivar	China	JiLin	125.18E	43.55N	NESp
280	16NF1379_1380	KeQiXiaoLiHeiDou	G.max	Landrace	China	NeiMengGu	111.65E	40.82N	NSp
281	16NF1383_1384	HeiNong37	G.max	Improved_cultivar	China	HeiLongJiang	126.64E	45.76N	NESp
282	16NF1385_1386	HeiNong39	G.max	Improved_cultivar	China	HeiLongJiang	126.64E	45.76N	NESp
283	16NF1397_1398	KenNong4Hao	G.max	Improved_cultivar	China	HeiLongJiang	126.64E	45.76N	NESp
284	16NF1399_1400	HeFeng35	G.max	Improved_cultivar	China	HeiLongJiang	126.64E	45.76N	NESp
285	16NF1403_1404	HeiHe10Hao	G.max	Improved_cultivar	China	HeiLongJiang	126.64E	45.76N	NESp
286	16NF1407	HeiHe12	G.max	Improved_cultivar	China	HeiLongJiang	126.64E	45.76N	NESp
287	16NF1409	HeiHe13	G.max	Improved_cultivar	China	HeiLongJiang	126.64E	45.76N	NESp
288	16NF1413_1414	HeiHe15	G.max	Improved_cultivar	China	HeiLongJiang	126.64E	45.76N	NESp
289	16NF1421_1422	JiLin36	G.max	Improved_cultivar	China	JiLin	125.18E	43.55N	NESp
290	16NF1423_1424	JiuNong21	G.max	Improved_cultivar	China	JiLin	125.18E	43.55N	NESp
291	16NF1451_1452	HeFeng40	G.max	Improved_cultivar	China	HeiLongJiang	126.64E	45.76N	NESp
292	16NF1471	HeiHe26	G.max	Improved_cultivar	China	HeiLongJiang	126.64E	45.76N	NESp
293	16NF1477_1478	HeiHe30	G.max	Improved_cultivar	China	HeiLongJiang	126.64E	45.76N	NESp
294	16NF1479	HeiHe31	G.max	Improved_cultivar	China	HeiLongJiang	126.64E	45.76N	NESp
295	16NF1481	HeiNong43	G.max	Improved_cultivar	China	HeiLongJiang	126.64E	45.76N	NESp
296	16NF1483_1484	HongFeng11	G.max	Improved_cultivar	China	HeiLongJiang	126.64E	45.76N	NESp
297	16NF1485_1486	BeiJiang1Hao	G.max	Improved_cultivar	China	HeiLongJiang	126.64E	45.76N	NESp
298	16NF1489_1490	KenNong18	G.max	Improved_cultivar	China	HeiLongJiang	126.64E	45.76N	NESp
299	16NF1491_1492	SuiNong20	G.max	Improved_cultivar	China	HeiLongJiang	126.64E	45.76N	NESp
300	16NF1493_1494	JiLin30	G.max	Improved_cultivar	China	JiLin	125.18E	43.55N	NESp
301	16NF1495_1496	JiYu48	G.max	Improved_cultivar	China	JiLin	125.18E	43.55N	NESp
302	16NF1497_1498	JiYu67	G.max	Improved_cultivar	China	JiLin	125.18E	43.55N	NESp
303	16NF1503_1504	LiaoDou11	G.max	Improved_cultivar	China	LiaoNing	123.23E	41.48N	NESp
304	16NF1505_1506	LiaoDou16	G.max	Improved_cultivar	China	LiaoNing	123.23E	41.48N	NESp
305	16NF1507_1508	TieFeng30	G.max	Improved_cultivar	China	LiaoNing	123.23E	41.48N	NESp
306	16NF1509_1510	MengDou12	G.max	Improved_cultivar	China	NeiMengGu	111.65E	40.82N	NESp
307	16NF1515_1516	HeiHe35	G.max	Improved_cultivar	China	HeiLongJiang	126.64E	45.76N	NESp
308	16NF1517_1518	HeiHe37	G.max	Improved_cultivar	China	HeiLongJiang	126.64E	45.76N	NESp
309	16NF1519_1520	HeiHe38	G.max	Improved_cultivar	China	HeiLongJiang	126.64E	45.76N	NESp
310	16NF1521_1522	HeiHe39	G.max	Improved_cultivar	China	HeiLongJiang	126.64E	45.76N	NESp
311	16NF1523_1524	HeiHe40	G.max	Improved_cultivar	China	HeiLongJiang	126.64E	45.76N	NESp
312	16NF1525_1526	HeiHe41	G.max	Improved_cultivar	China	HeiLongJiang	126.64E	45.76N	NESp
313	16NF1527_1528	HeiHe42	G.max	Improved_cultivar	China	HeiLongJiang	126.64E	45.76N	NESp
314	16NF1531_1532	HeiHe50	G.max	Improved_cultivar	China	HeiLongJiang	126.64E	45.76N	NESp
315	16NF1533_1534	BeiFeng9Hao	G.max	Improved_cultivar	China	HeiLongJiang	126.64E	45.76N	NESp
316	16NF1535_1536	HuaJiang4Hao	G.max	Improved_cultivar	China	HeiLongJiang	126.64E	45.76N	NESp
317	16NF1537_1538	KenFeng13	G.max	Improved_cultivar	China	HeiLongJiang	126.64E	45.76N	NESp
318	16NF1539_1540	KenFeng16	G.max	Improved_cultivar	China	HeiLongJiang	126.64E	45.76N	NESp
319	16NF1541_1542	KenFeng17	G.max	Improved_cultivar	China	HeiLongJiang	126.64E	45.76N	NESp
320	16NF1543_1544	KenFeng22	G.max	Improved_cultivar	China	HeiLongJiang	126.64E	45.76N	NESp
321	16NF1545_1546	BeiDou5Hao	G.max	Improved_cultivar	China	HeiLongJiang	126.64E	45.76N	NESp
322	16NF1557_1558	HeiNong47	G.max	Improved_cultivar	China	HeiLongJiang	126.64E	45.76N	NESp
323	16NF1559_1560	HeiNong48	G.max	Improved_cultivar	China	HeiLongJiang	126.64E	45.76N	NESp
324	16NF1561_1562	DongNong50	G.max	Improved_cultivar	China	HeiLongJiang	126.64E	45.76N	NESp
325	16NF1563_1564	JiNong22	G.max	Improved_cultivar	China	JiLin	125.18E	43.55N	NESp
326	16NF1567_1568	TieFeng29	G.max	Improved_cultivar	China	LiaoNing	123.23E	41.48N	NESp
327	16NF1569_1570	JinDou36	G.max	Improved_cultivar	China	LiaoNing	123.23E	41.48N	NESp
328	16NF1571_1572	MengDou14	G.max	Improved_cultivar	China	NeiMengGu	111.65E	40.82N	NESp
329	16NF1575_1576	JiangMoDou1Hao	G.max	Improved_cultivar	China	HeiLongJiang	126.64E	45.76N	NESp
330	16NF1583_1584	HeiHe49	G.max	Improved_cultivar	China	HeiLongJiang	126.64E	45.76N	NESp
331	16NF1585_1586	HeiHe44	G.max	Improved_cultivar	China	HeiLongJiang	126.64E	45.76N	NESp
332	16NF1587_1588	HeiHe33	G.max	Improved_cultivar	China	HeiLongJiang	126.64E	45.76N	NESp
333	16NF1589_1590	HeiHe51hao	G.max	Improved_cultivar	China	HeiLongJiang	126.64E	45.76N	NESp
334	16NF1591_1592	HeiHe43	G.max	Improved_cultivar	China	HeiLongJiang	126.64E	45.76N	NESp
335	16NF1593_1594	HeiHe18	G.max	Improved_cultivar	China	HeiLongJiang	126.64E	45.76N	NESp
336	16NF1597_1598	HeiKe60Hao	G.max	Improved_cultivar	China	HeiLongJiang	126.64E	45.76N	NESp
337	16NF1599_1600	LiaoDou26	G.max	Improved_cultivar	China	LiaoNing	123.23E	41.48N	NESp
338	16NF1601_1602	LiaoXiaoLiDou2Hao	G.max	Improved_cultivar	China	LiaoNing	123.23E	41.48N	NESp
339	16NF1603_1604	LiaoDou24	G.max	Improved_cultivar	China	LiaoNing	123.23E	41.48N	NESp
340	16NF1605_1606	LiaoDou32	G.max	Improved_cultivar	China	LiaoNing	123.23E	41.48N	NESp
341	16NF1607_1608	LiaoDou37	G.max	Improved_cultivar	China	LiaoNing	123.23E	41.48N	NESp
342	16NF1609_1610	Liao08Q104	G.max	Improved_cultivar	China	LiaoNing	123.23E	41.48N	NESp
343	16NF1611_1612	Liao10Q015	G.max	Improved_cultivar	China	LiaoNing	123.23E	41.48N	NESp
344	16NF1613_1614	Liao0913	G.max	Improved_cultivar	China	LiaoNing	123.23E	41.48N	NESp
345	16NF1615_1616	Liao08012	G.max	Improved_cultivar	China	LiaoNing	123.23E	41.48N	NESp
346	16NF1617_1618	Liao08024	G.max	Improved_cultivar	China	LiaoNing	123.23E	41.48N	NESp
347	16NF1619_1620	AXN-1-55	G.max	Improved_cultivar	United_States	NA	74.25W	40.69N	WDD_Sp
348	16NF1621_1622	LongPin12-328	G.max	Improved_cultivar	China	HeiLongJiang	126.64E	45.76N	NESp
349	16NF1623_1624	LongPin13-369	G.max	Improved_cultivar	China	HeiLongJiang	126.64E	45.76N	NESp
350	16NF1625_1626	LongPin10-217	G.max	Improved_cultivar	China	HeiLongJiang	126.64E	45.76N	NESp
351	16NF1627_1628	JiYu105	G.max	Improved_cultivar	China	JiLin	125.18E	43.55N	NESp
352	16NF1629_1630	JiYu108	G.max	Improved_cultivar	China	JiLin	125.18E	43.55N	NESp
353	16NF1631_1632	JiYu109	G.max	Improved_cultivar	China	JiLin	125.18E	43.55N	NESp
354	16NF1633_1634	JiYu101	G.max	Improved_cultivar	China	JiLin	125.18E	43.55N	NESp
355	16NF1637_1638	JiLinXiaoLi7Hao	G.max	Improved_cultivar	China	JiLin	125.18E	43.55N	NESp
356	16NF1639_1640	JiYu86	G.max	Improved_cultivar	China	JiLin	125.18E	43.55N	NESp
357	16NF1641_1642	JiYu404	G.max	Improved_cultivar	China	JiLin	125.18E	43.55N	NESp
358	16NF1643_1644	JiYu406	G.max	Improved_cultivar	China	JiLin	125.18E	43.55N	NESp
359	16NF1645_1646	JiYu302	G.max	Improved_cultivar	China	JiLin	125.18E	43.55N	NESp
360	16NF1647_1648	JiYu204	G.max	Improved_cultivar	China	JiLin	125.18E	43.55N	NESp
361	16NF1649_1650	JL15-13	G.max	Improved_cultivar	China	JiLin	125.18E	43.55N	NESp
362	16NF1651_1652	YZY2004-15-W90	G.max	Improved_cultivar	China	BeiJing	116.28E	39.54N	NSp
363	16NF1653_1654	YZY2004-15-15W83	G.max	Improved_cultivar	China	BeiJing	116.28E	39.54N	NSp
364	16NF1655_1656	JiMiDou2Hao	G.max	Improved_cultivar	China	JiLin	125.18E	43.55N	NESp
365	16NF1657_1658	JiMiDou3Hao	G.max	Improved_cultivar	China	JiLin	125.18E	43.55N	NESp
366	16NF1659_1660	Ke11-1669	G.max	Improved_cultivar	China	HeiLongJiang	126.64E	45.76N	NESp
367	16NF1661_1662	Ke'c14-732	G.max	Improved_cultivar	China	HeiLongJiang	126.64E	45.76N	NESp
368	16NF1663_1664	Ke09-95	G.max	Improved_cultivar	China	HeiLongJiang	126.64E	45.76N	NESp
369	16NF1665_1666	Ls15	G.max	Improved_cultivar	China	HeiLongJiang	126.64E	45.76N	NESp
370	16NF1667_1668	Ls18	G.max	Improved_cultivar	China	HeiLongJiang	126.64E	45.76N	NESp
371	16NF1671_1672	1428	G.max	Improved_cultivar	China	HeiLongJiang	126.64E	45.76N	NESp
372	16NF1673_1674	1474	G.max	Improved_cultivar	China	HeiLongJiang	126.64E	45.76N	NESp
373	16NF1675_1676	2020	G.max	Improved_cultivar	China	HeiLongJiang	126.64E	45.76N	NESp
374	16NF1677_1678	Ha13-2089	G.max	Improved_cultivar	China	HeiLongJiang	126.64E	45.76N	NESp
375	16NF1679_1680	Ha13-2413	G.max	Improved_cultivar	China	HeiLongJiang	126.64E	45.76N	NESp
376	16NF1681_1682	Ha13-2958	G.max	Improved_cultivar	China	HeiLongJiang	126.64E	45.76N	NESp
377	16NF1683_1684	Ha14-2028	G.max	Improved_cultivar	China	HeiLongJiang	126.64E	45.76N	NESp
378	16NF1685_1686	Ha12-3510	G.max	Improved_cultivar	China	HeiLongJiang	126.64E	45.76N	NESp
379	16NF1687_1688	Ha13-2185	G.max	Improved_cultivar	China	HeiLongJiang	126.64E	45.76N	NESp
380	16NF1689_1690	Ha13-2187	G.max	Improved_cultivar	China	HeiLongJiang	126.64E	45.76N	NESp
381	16NF1691_1692	Ha14-2146	G.max	Improved_cultivar	China	HeiLongJiang	126.64E	45.76N	NESp
382	16NF1693_1694	Ha12-4547	G.max	Improved_cultivar	China	HeiLongJiang	126.64E	45.76N	NESp
383	16NF1695_1696	Ha13-1613	G.max	Improved_cultivar	China	HeiLongJiang	126.64E	45.76N	NESp
384	16NF1697_1698	Ha11-4519	G.max	Improved_cultivar	China	HeiLongJiang	126.64E	45.76N	NESp
385	16NF1699_1700	Ha11-3646	G.max	Improved_cultivar	China	HeiLongJiang	126.64E	45.76N	NESp
386	16NF1701_1702	Ha11-4142	G.max	Improved_cultivar	China	HeiLongJiang	126.64E	45.76N	NESp
387	16NF1703_1704	Ha11-2541	G.max	Improved_cultivar	China	HeiLongJiang	126.64E	45.76N	NESp
388	16NF1705_1706	Ha12-4891	G.max	Improved_cultivar	China	HeiLongJiang	126.64E	45.76N	NESp
389	16NF1707_1708	DongSheng7Hao	G.max	Improved_cultivar	China	HeiLongJiang	126.64E	45.76N	NESp
390	16NF1711_1712	ZhongKeMaoDou2Hao	G.max	Improved_cultivar	China	HeiLongJiang	126.64E	45.76N	NESp
391	16NF1713_1714	BanBenZaoSheng	G.max	Improved_cultivar	Japan	NA	139.69E	35.69N	WDD_Su
392	16NF1721_1722	Toyomosume	G.max	Improved_cultivar	Japan	NA	139.69E	35.69N	WDD_Su
393	16NF1723_1724	Kariyutaka	G.max	Improved_cultivar	Japan	Hokkaido	139.20E	40.33N	WDD_Su
394	16NF1725_1726	DongSheng7Hao	G.max	Improved_cultivar	China	HeiLongJiang	126.64E	45.76N	NESp
395	16NF1729_1730	JiLinCaiLiXiang	G.max	Landrace	China	JiLin	125.18E	43.55N	NESp
396	16NF1731_1732	ChangNong16	G.max	Improved_cultivar	China	JiLin	125.18E	43.55N	NESp
397	16NF1733_1734	HLT1--HeiHe13	G.max	Improved_cultivar	China	HeiLongJiang	126.64E	45.76N	NESp
398	16NF1735_1736	HLT2--HeiHe13	G.max	Improved_cultivar	China	HeiLongJiang	126.64E	45.76N	NESp
399	16NF1737_1738	HLT3--HeiHe13	G.max	Improved_cultivar	China	HeiLongJiang	126.64E	45.76N	NESp
400	16NF1739_1740	HLT4--HeiHe13	G.max	Improved_cultivar	China	HeiLongJiang	126.64E	45.76N	NESp
401	16NF1741_1742	HLT5--HeiHe13	G.max	Improved_cultivar	China	HeiLongJiang	126.64E	45.76N	NESp
402	16NF1745_1746	HLT7--HeiHe13	G.max	Improved_cultivar	China	HeiLongJiang	126.64E	45.76N	NESp
403	16NF1747_1748	HLT8--HeiHe13	G.max	Improved_cultivar	China	HeiLongJiang	126.64E	45.76N	NESp
404	16NF1749_1750	KeShan1Hao	G.max	Improved_cultivar	China	HeiLongJiang	126.64E	45.76N	NESp
405	16NF1751_1752	JiYu72	G.max	Improved_cultivar	China	JiLin	125.18E	43.55N	NESp
406	16NF1753_1754	TieFeng31	G.max	Improved_cultivar	China	LiaoNing	123.23E	41.48N	NESp
407	16NF1757_1758	HeJiao02-69	G.max	Improved_cultivar	China	HeiLongJiang	126.64E	45.76N	NESp
408	16NF1767_1768	MiYunHeiDou	G.max	Landrace	China	BeiJing	116.28E	39.54N	NSp
409	16NF1769_1770	ShunYiHeiDou	G.max	Landrace	China	BeiJing	116.28E	39.54N	NSp
410	16NF1779_1780	MaoHuangDou	G.max	Landrace	China	HeBei	114.26E	38.03N	NSp
411	16NF1783_1784	JiZaoHuang1	G.max	Landrace	China	HeBei	114.26E	38.03N	NSp
412	16NF1785_1786	ZhuangYuanQingHeiDou	G.max	Landrace	China	HeBei	114.26E	38.03N	NSp
413	16NF1787_1788	JinDou371	G.max	Improved_cultivar	China	ShanXi	112.33E	37.51N	NSp
414	16NF1801_1802	DaBaiDou1	G.max	Landrace	China	ShanXi	112.33E	37.51N	NSp
415	16NF1815_1816	XiaoHeiDou12	G.max	Landrace	China	ShanXi	112.33E	37.51N	NSp
416	16NF1817_1818	XiaoHeiDou27	G.max	Landrace	China	ShanXi	112.33E	37.51N	NSp
417	16NF1823_1824	HeiDou10	G.max	Landrace	China	ShanXi	112.33E	37.51N	NSp
418	16NF1827_1828	ChiBuLiuHeiDou	G.max	Landrace	China	ShanXi	112.33E	37.51N	NSp
419	16NF1831_1832	ChuanManHeiDou	G.max	Landrace	China	ShanXi	112.33E	37.51N	NSp
420	16NF1853_1854	XiaoHeiDou13	G.max	Landrace	China	ShanXi	112.33E	37.51N	NSp
421	16NF1861_1862	XiaoHeiDou	G.max	Landrace	China	ShanXi	112.33E	37.51N	NSp
422	16NF1867_1868	XiaoKeHei	G.max	Landrace	China	ShanXi	112.33E	37.51N	NSp
423	16NF1869_1870	XiaoHeiDou	G.max	Landrace	China	ShanXi	112.33E	37.51N	NSp
424	16NF1871_1872	XiaoHeiDou	G.max	Landrace	China	ShanXi	112.33E	37.51N	NSp
425	16NF1875_1876	TuHeiDou	G.max	Landrace	China	ShanXi	112.33E	37.51N	NSp
426	16NF1877_1878	YuanHeiDou2	G.max	Landrace	China	ShanXi	112.33E	37.51N	NSp
427	16NF1879_1880	HongHeiDou	G.max	Landrace	China	ShanXi	112.33E	37.51N	NSp
428	16NF1881_1882	HongDaDou	G.max	Landrace	China	ShanXi	112.33E	37.51N	NSp
429	16NF1883_1884	MaiZiDou	G.max	Landrace	China	ShanXi	112.33E	37.51N	NSp
430	16NF1885_1886	HongXiaoDou	G.max	Landrace	China	ShanXi	112.33E	37.51N	NSp
431	16NF1909_1910	TongXianHuangDou	G.max	Landrace	China	BeiJing	116.28E	39.54N	NSp
432	16NF1917_1918	YanQingChaDou	G.max	Landrace	China	BeiJing	116.28E	39.54N	NSp
433	16NF1927_1928	LouTianWaZiHeiDou	G.max	Landrace	China	NingXia	106.13E	38.28N	NSp
434	16NF1929_1930	NiDingHuaMeiDou	G.max	Landrace	China	NingXia	106.13E	38.28N	NSp
435	16NF1941_1942	GuanJiaWuDaJinYuan	G.max	Landrace	China	HeBei	114.26E	38.03N	NSp
436	16NF1945_1946	XinHuaXiaoJinYuan	G.max	Landrace	China	HeBei	114.26E	38.03N	NSp
437	16NF1949_1950	XiaoZhangDaHuangDou	G.max	Landrace	China	HeBei	114.26E	38.03N	NSp
438	16NF1951_1952	YiWoHouHuangDou	G.max	Landrace	China	HeBei	114.26E	38.03N	NSp
439	16NF1957_1958	DaQingPiHuangDou	G.max	Landrace	China	HeBei	114.26E	38.03N	NSp
440	16NF1967_1968	XuZhuangDaHeiDou	G.max	Landrace	China	HeBei	114.26E	38.03N	NSp
441	16NF2001_2002	DaHuangDou<1>	G.max	Landrace	China	ShanXi	112.33E	37.51N	NSp
442	16NF2009_2010	DaHuangDou3	G.max	Landrace	China	ShanXi	112.33E	37.51N	NSp
443	16NF2023_2024	LvSeDou	G.max	Landrace	China	ShanXi	112.33E	37.51N	NSp
444	16NF2027_2028	DaQingDou2	G.max	Landrace	China	ShanXi	112.33E	37.51N	NSp
445	16NF2037_2038	XiaoHeiDou6	G.max	Landrace	China	ShanXi	112.33E	37.51N	NSp
446	16NF2047_2048	HeiGunDou1	G.max	Landrace	China	ShanXi	112.33E	37.51N	NSp
447	16NF2051_2052	HeiDou16	G.max	Landrace	China	ShanXi	112.33E	37.51N	NSp
448	16NF2061_2062	XiaoHeiDou7	G.max	Landrace	China	ShanXi	112.33E	37.51N	NSp
449	16NF2093_2094	HongMeiDou<2>	G.max	Landrace	China	ShanXi	112.33E	37.51N	NSp
450	16NF2095_2096	HongMeiDou	G.max	Landrace	China	ShanXi	112.33E	37.51N	NSp
451	16NF2109_2110	BaoGongDou	G.max	Landrace	China	ShanXi	112.33E	37.51N	NSp
452	16NF2111_2112	JingSiDou	G.max	Landrace	China	ShanXi	112.33E	37.51N	NSp
453	16NF2115_2116	CanSiDou2	G.max	Landrace	China	ShanXi	112.33E	37.51N	NSp
454	16NF2117_2118	GuiLianBaiDou	G.max	Landrace	China	ShanXi	112.33E	37.51N	NSp
455	16NF2119_2120	HuangDou3	G.max	Landrace	China	ShaanXi	108.55E	34.15N	NSp
456	16NF2121_2122	BaYueZha2	G.max	Landrace	China	ShaanXi	108.55E	34.15N	NSp
457	16NF2129_2130	LvDaBaiDou	G.max	Landrace	China	ShaanXi	108.55E	34.15N	NSp
458	16NF2131_2132	LvPiDaDou	G.max	Landrace	China	ShaanXi	108.55E	34.15N	NSp
459	16NF2133_2134	LvDaDou2	G.max	Landrace	China	ShaanXi	108.55E	34.15N	NSp
460	16NF2135_2136	BenDiHeiDou	G.max	Landrace	China	ShaanXi	108.55E	34.15N	NSp
461	16NF2139_2140	SanGuTiaoHeiDou	G.max	Landrace	China	ShaanXi	108.55E	34.15N	NSp
462	16NF2141_2142	YuanBoHeiDou	G.max	Landrace	China	ShaanXi	108.55E	34.15N	NSp
463	16NF2143_2144	XiaoHeiDou10	G.max	Landrace	China	ShaanXi	108.55E	34.15N	NSp
464	16NF2145_2146	HeiHeiDou3	G.max	Landrace	China	ShaanXi	108.55E	34.15N	NSp
465	16NF2147_2148	NiuWeiBaHeiDou	G.max	Landrace	China	ShaanXi	108.55E	34.15N	NSp
466	16NF2151_2152	ZaoShuHeiDou	G.max	Landrace	China	ShaanXi	108.55E	34.15N	NSp
467	16NF2169_2170	BaYueZha4	G.max	Landrace	China	GanSu	103.50E	36.03N	NSp
468	16NF2173_2174	HuangPiXiaoHuangDou	G.max	Landrace	China	GanSu	103.50E	36.03N	NSp
469	16NF2175_2176	HuangGunDou	G.max	Landrace	China	GanSu	103.50E	36.03N	NSp
470	16NF2185_2186	HeiGunDou3	G.max	Landrace	China	GanSu	103.50E	36.03N	NSp
471	16NF2195_2196	MaHeiDou	G.max	Landrace	China	GanSu	103.50E	36.03N	NSp
472	16NF2197_2198	HuoHuangDou	G.max	Landrace	China	GanSu	103.50E	36.03N	NSp
473	16NF2215_2216	ManZhangZiXiaoLiHeiDou	G.max	Landrace	China	HeBei	114.26E	38.03N	NSp
474	16NF2219_2220	NiuPiHuang	G.max	Landrace	China	HeBei	114.26E	38.03N	NSp
475	16NF2223_2224	JinDou15Hao	G.max	Improved_cultivar	China	ShanXi	112.33E	37.51N	NSp
476	16NF2225_2226	JinPin19Hao	G.max	Improved_cultivar	China	ShanXi	112.33E	37.51N	NSp
477	16NF2231_2232	JinDou19	G.max	Improved_cultivar	China	ShanXi	112.33E	37.51N	NSp
478	16NF2233_2234	FenDou31Hao	G.max	Improved_cultivar	China	ShanXi	112.33E	37.51N	NSp
479	16NF2239_2240	MaoYan	G.max	Landrace	China	ShanXi	112.33E	37.51N	NSp
480	16NF2243_2244	KeFeng14	G.max	Improved_cultivar	China	BeiJing	116.28E	39.54N	NSp
481	16NF2247_2248	ZhongHuang14	G.max	Improved_cultivar	China	BeiJing	116.28E	39.54N	NSp
482	16NF2253_2254	ZhongHuang20	G.max	Improved_cultivar	China	BeiJing	116.28E	39.54N	NSp
483	16NF2267_2268	XinDaDou1Hao	G.max	Improved_cultivar	China	XinJiang	87.36E	43.46N	NSp
484	16NF2269_2270	JiDou15	G.max	Improved_cultivar	China	HeBei	114.26E	38.03N	NSp
485	16NF2277_2278	JinDou21	G.max	Improved_cultivar	China	ShanXi	112.33E	37.51N	NSp
486	16NF2279_2280	JinDou28	G.max	Improved_cultivar	China	ShanXi	112.33E	37.51N	NSp
487	16NF2281_2282	JinDou25	G.max	Improved_cultivar	China	ShanXi	112.33E	37.51N	NSp
488	16NF2283_2284	QiHuang31(Lu99-7)	G.max	Improved_cultivar	China	ShanDong	120.18E	36.03N	HSu
489	16NF2295_2296	KeXin3Hao	G.max	Improved_cultivar	China	BeiJing	116.28E	39.54N	NSp
490	16NF2299_2300	ZhongHuang35	G.max	Improved_cultivar	China	BeiJing	116.28E	39.54N	NSp
491	16NF2301_2302	ZhongHuang37	G.max	Improved_cultivar	China	BeiJing	116.28E	39.54N	NSp
492	16NF2305_2306	JiDou17	G.max	Improved_cultivar	China	HeBei	114.26E	38.03N	NSp
493	16NF2307_2308	JinDa78	G.max	Improved_cultivar	China	ShanXi	112.33E	37.51N	NSp
494	16NF3493_3494	KeFeng1hao	G.max	Improved_cultivar	China	BeiJing	116.28E	39.54N	NSp
495	16NF3505_3506	HuaChun2Hao	G.max	Improved_cultivar	China	GuangDong	113.18E	23.10N	SSp
496	16NF4295_4296	ZhongHuang10	G.max	Improved_cultivar	China	BeiJing	116.28E	39.54N	NSp
497	16NF4299_4300	ZhongHuang688	G.max	Improved_cultivar	China	BeiJing	116.28E	39.54N	NSp
498	16NF4301_4302	HeiHe21	G.max	Improved_cultivar	China	HeiLongJiang	126.64E	45.76N	NESp
499	16NF4303_4304	HeiHe23	G.max	Improved_cultivar	China	HeiLongJiang	126.64E	45.76N	NESp
500	16NF4305_4306	HeiHe27	G.max	Improved_cultivar	China	HeiLongJiang	126.64E	45.76N	NESp
501	16NF4404	HeiNong26	G.max	Improved_cultivar	China	HeiLongJiang	126.64E	45.76N	NESp
502	16NF4405	BaiPiDou	G.max	Landrace	China	LiaoNing	123.23E	41.48N	NESp
503	16NF4412	NiuMaoHuang3	G.max	Landrace	China	LiaoNing	123.23E	41.48N	NESp
504	16NF4414	DaLiHeiDou2	G.max	Landrace	China	LiaoNing	123.23E	41.48N	NESp
505	16NF4440	JinZhou4-1	G.max	Landrace	China	LiaoNing	123.23E	41.48N	NESp
506	16NF4441	Kai8157-3-3-1	G.max	Improved_cultivar	China	LiaoNing	123.23E	41.48N	NESp
507	16NF4447	BeiShiFoHuangDou	G.max	Landrace	China	HeBei	114.26E	38.03N	NSp
508	16NF4449	XiaoHeiDou17	G.max	Landrace	China	ShanXi	112.33E	37.51N	NSp
509	16NF4452	XiaoHeiDou9	G.max	Landrace	China	ShaanXi	108.55E	34.15N	NSp
510	16NF4453	DongShan69	G.max	Improved_cultivar	China	ShanXi	112.33E	37.51N	NSp
511	16NF4458	JiDou12	G.max	Improved_cultivar	China	HeBei	114.26E	38.03N	NSp
512	16NF4467	DongLiaoKeShuang	G.max	Landrace	China	JiLin	125.18E	43.55N	NESp
513	16NF4494	HeiNong2Hao	G.max	Improved_cultivar	China	HeiLongJiang	126.64E	45.76N	NESp
514	16NF4497	HeiHe4Hao	G.max	Improved_cultivar	China	HeiLongJiang	126.64E	45.76N	NESp
515	16NF4499	HeFeng25Hao	G.max	Improved_cultivar	China	HeiLongJiang	126.64E	45.76N	NESp
516	16NF4500	Ke4430-20	G.max	Improved_cultivar	China	HeiLongJiang	126.64E	45.76N	NESp
517	16NF4515	FenDou49	G.max	Improved_cultivar	China	ShanXi	112.33E	37.51N	NSp
518	16NF4526	JiHuang138	G.max	Improved_cultivar	China	JiLin	125.18E	43.55N	NESp
519	16NF4529	CanSiDou1	G.max	Landrace	China	ShanXi	112.33E	37.51N	NSp
520	16NF4540	MaoYanDou2	G.max	Landrace	China	HeBei	114.26E	38.03N	NSp
521	16NF4545	XiaoHeiDou8	G.max	Landrace	China	ShanXi	112.33E	37.51N	NSp
522	16NF4546	JinYi9Hao	G.max	Improved_cultivar	China	ShanXi	112.33E	37.51N	NSp
523	16NF4574	WuXing1Hao	G.max	Improved_cultivar	China	HeBei	114.26E	38.03N	NSp
524	16NF4578	JinPin42	G.max	Improved_cultivar	China	ShanXi	112.33E	37.51N	NSp
525	16NF4599	HeiHe32	G.max	Improved_cultivar	China	HeiLongJiang	126.64E	45.76N	NESp
526	16NF4600	JinDou39	G.max	Improved_cultivar	China	ShanXi	112.33E	37.51N	NSp
527	16NF4628_4629	HeiHe7Hao	G.max	Improved_cultivar	China	HeiLongJiang	126.64E	45.76N	NESp
528	16NF4708	ZhongHuang39	G.max	Improved_cultivar	China	BeiJing	116.28E	39.54N	NSp
529	16NF4714	ZhongHuang45	G.max	Improved_cultivar	China	BeiJing	116.28E	39.54N	NSp
530	16NF4715	ZhongHuang19	G.max	Improved_cultivar	China	BeiJing	116.28E	39.54N	NSp
531	16NF4716	ZhongPin95-5383	G.max	Improved_cultivar	China	BeiJing	116.28E	39.54N	NSp
532	16NF4718	ZhongHuang22	G.max	Improved_cultivar	China	BeiJing	116.28E	39.54N	NSp
533	16NF1443_1444	Zheng92116	G.max	Improved_cultivar	China	HeNan	113.40E	34.46N	NSp
534	16NF2257_2258	ZhongDou27	G.max	Improved_cultivar	China	BeiJing	116.28E	39.54N	NSp
535	16NF2285_2286	Zheng98005	G.max	Improved_cultivar	China	HeNan	113.40E	34.46N	NSp
536	16NF2287_2288	XuDou11	G.max	Improved_cultivar	China	JiangSu	118.75E	32.04N	HSu
537	16NF2289_2290	WanDou16	G.max	Improved_cultivar	China	AnHui	117.17E	31.52N	HSu
538	16NF2291_2292	WanDou19	G.max	Improved_cultivar	China	AnHui	117.17E	31.52N	HSu
539	16NF2321_2322	An1498	G.max	Improved_cultivar	China	NA	116.28E	39.54N	HSu
540	16NF2325_2326	FenDou78	G.max	Improved_cultivar	China	ShanXi	112.33E	37.51N	NSp
541	16NF2329_2330	QiHuang35	G.max	Improved_cultivar	China	ShanDong	120.18E	36.03N	HSu
542	16NF2331_2332	QiHuang36	G.max	Improved_cultivar	China	ShanDong	120.18E	36.03N	HSu
543	16NF2333_2334	QiHuang38	G.max	Improved_cultivar	China	ShanDong	120.18E	36.03N	HSu
544	16NF2335_2336	QiHuang39	G.max	Improved_cultivar	China	ShanDong	120.18E	36.03N	HSu
545	16NF2337_2338	QiHuang40	G.max	Improved_cultivar	China	ShanDong	120.18E	36.03N	HSu
546	16NF2339_2340	QiHuang41	G.max	Improved_cultivar	China	ShanDong	120.18E	36.03N	HSu
547	16NF2341_2342	QiHuang42	G.max	Improved_cultivar	China	ShanDong	120.18E	36.03N	HSu
548	16NF2343_2344	ZhongHuang68	G.max	Improved_cultivar	China	BeiJing	116.28E	39.54N	NSp
549	16NF2347_2348	ZhongZuo09-560	G.max	Improved_cultivar	China	BeiJing	116.28E	39.54N	NSp
550	16NF2351_2352	Z11-78-1	G.max	Improved_cultivar	China	BeiJing	116.28E	39.54N	NSp
551	16NF2353_2354	Z11-256	G.max	Improved_cultivar	China	BeiJing	116.28E	39.54N	NSp
552	16NF2355_2356	6221-15	G.max	Improved_cultivar	China	BeiJing	116.28E	39.54N	NSp
553	16NF2359_2360	Z11-245	G.max	Improved_cultivar	China	BeiJing	116.28E	39.54N	NSp
554	16NF2361_2362	Z13-653-1	G.max	Improved_cultivar	China	BeiJing	116.28E	39.54N	NSp
555	16NF2363_2364	Z13-630-15	G.max	Improved_cultivar	China	BeiJing	116.28E	39.54N	NSp
556	16NF2365_2366	Z13-631-2	G.max	Improved_cultivar	China	BeiJing	116.28E	39.54N	NSp
557	16NF2367_2368	Z13-642-4	G.max	Improved_cultivar	China	BeiJing	116.28E	39.54N	NSp
558	16NF2369_2370	Z13-628-3	G.max	Improved_cultivar	China	BeiJing	116.28E	39.54N	NSp
559	16NF2371_2372	Z13-631-7	G.max	Improved_cultivar	China	BeiJing	116.28E	39.54N	NSp
560	16NF2373_2374	Z13-633-1	G.max	Improved_cultivar	China	BeiJing	116.28E	39.54N	NSp
561	16NF2375_2376	Z13-653-6	G.max	Improved_cultivar	China	BeiJing	116.28E	39.54N	NSp
562	16NF2377_2378	XuDou9Hao	G.max	Improved_cultivar	China	JiangSu	118.75E	32.04N	HSu
563	16NF2379_2380	SiDou288	G.max	Improved_cultivar	China	JiangSu	118.75E	32.04N	HSu
564	16NF2381_2382	WanDou33	G.max	Improved_cultivar	China	AnHui	117.17E	31.52N	HSu
565	16NF2389_2390	TianLongYiHao	G.max	Improved_cultivar	China	HuBei	115.32E	30.52N	SSu
566	16NF2395_2396	ZhongDou8Hao	G.max	Improved_cultivar	China	HuBei	115.32E	30.52N	SSu
567	16NF2415_2416	XiaoLiQingDou	G.max	Landrace	China	HeBei	114.26E	38.03N	HSu
568	16NF2427_2428	LeTingXiaoHeiDou	G.max	Landrace	China	HeBei	114.26E	38.03N	HSu
569	16NF2429_2430	HeiDou	G.max	Landrace	China	HeBei	114.26E	38.03N	HSu
570	16NF2433_2434	SuNingXiaoHeiDou	G.max	Landrace	China	HeBei	114.26E	38.03N	HSu
571	16NF2437_2438	PingDingHuangHeiDou	G.max	Landrace	China	HeBei	114.26E	38.03N	HSu
572	16NF2445_2446	PingDingHuangHeiDou2	G.max	Landrace	China	HeBei	114.26E	38.03N	HSu
573	16NF2451_2452	HeiDou5	G.max	Landrace	China	HeBei	114.26E	38.03N	HSu
574	16NF2453_2454	HeiDou6	G.max	Landrace	China	HeBei	114.26E	38.03N	HSu
575	16NF2457_2458	HeiDou7	G.max	Landrace	China	HeBei	114.26E	38.03N	HSu
576	16NF2461_2462	MouPingPingDingHuang	G.max	Improved_cultivar	China	ShanDong	120.18E	36.03N	HSu
577	16NF2465_2466	QiHuang10Hao	G.max	Improved_cultivar	China	ShanDong	120.18E	36.03N	HSu
578	16NF2469_2470	JuXuan23	G.max	Improved_cultivar	China	ShanDong	120.18E	36.03N	HSu
579	16NF2481_2482	QiYueMang	G.max	Landrace	China	ShanDong	120.18E	36.03N	HSu
580	16NF2483_2484	PingDingHuang1	G.max	Landrace	China	ShanDong	120.18E	36.03N	HSu
581	16NF2485_2486	PingDingHuang2	G.max	Landrace	China	ShanDong	120.18E	36.03N	HSu
582	16NF2513_2514	WanShuPingDingHuang	G.max	Landrace	China	ShanDong	120.18E	36.03N	HSu
583	16NF2523_2524	DaLiFengBi	G.max	Landrace	China	ShanDong	120.18E	36.03N	HSu
584	16NF2525_2526	SiLiQing	G.max	Landrace	China	ShanDong	120.18E	36.03N	HSu
585	16NF2527_2528	JiangNanQing	G.max	Landrace	China	ShanDong	120.18E	36.03N	HSu
586	16NF2531_2532	XiaoHeiDou24	G.max	Landrace	China	ShanDong	120.18E	36.03N	HSu
587	16NF2537_2538	HeiJiaZi	G.max	Landrace	China	ShanDong	120.18E	36.03N	HSu
588	16NF2545_2546	SiLiuQiHeiDou	G.max	Landrace	China	ShanDong	120.18E	36.03N	HSu
589	16NF2547_2548	HongYouDou	G.max	Landrace	China	ShanDong	120.18E	36.03N	HSu
590	16NF2551_2552	HongDou2	G.max	Landrace	China	ShanDong	120.18E	36.03N	HSu
591	16NF2553_2554	ChaDou3	G.max	Landrace	China	ShanDong	120.18E	36.03N	HSu
592	16NF2573_2574	ChangYuanXiaoTian'eDan	G.max	Landrace	China	HeNan	113.40E	34.46N	HSu
593	16NF2593_2594	ChenLiuNiuMaoHuang	G.max	Landrace	China	HeNan	113.40E	34.46N	HSu
594	16NF2597_2598	HengChuanTian'eDan	G.max	Landrace	China	HeNan	113.40E	34.46N	HSu
595	16NF2599_2600	LuoShanTian'eDan	G.max	Landrace	China	HeNan	113.40E	34.46N	HSu
596	16NF2601_2602	DanChengDaLiHuang	G.max	Landrace	China	HeNan	113.40E	34.46N	HSu
597	16NF2607_2608	QinYangShuiDou	G.max	Landrace	China	HeNan	113.40E	34.46N	HSu
598	16NF2629_2630	ShangQiuDaZiHeiDou	G.max	Landrace	China	HeNan	113.40E	34.46N	HSu
599	16NF2653_2654	BaiGunDou	G.max	Landrace	China	ShaanXi	108.55E	34.15N	HSu
600	16NF2659_2660	HeiDou8	G.max	Landrace	China	ShaanXi	108.55E	34.15N	HSu
601	16NF2663_2664	XiNong509	G.max	Landrace	China	ShaanXi	108.55E	34.15N	HSu
602	16NF2665_2666	LaoShuPi1	G.max	Landrace	China	ShaanXi	108.55E	34.15N	HSu
603	16NF2667_2668	BaYueZha	G.max	Landrace	China	ShaanXi	108.55E	34.15N	HSu
604	16NF2681_2682	DongHaiBaiHuaCaoJia	G.max	Landrace	China	JiangSu	118.75E	32.04N	HSp
605	16NF2687_2688	GuanYunHongMaoYouBing	G.max	Landrace	China	JiangSu	118.75E	32.04N	HSp
606	16NF2695_2696	FengXianNiuMaoHuang	G.max	Landrace	China	JiangSu	118.75E	32.04N	HSu
607	16NF2699_2700	TongShanPingDingWu	G.max	Landrace	China	JiangSu	118.75E	32.04N	HSu
608	16NF2719_2720	LianShuiTian'eDan	G.max	Landrace	China	JiangSu	118.75E	32.04N	HSu
609	16NF2743_2744	KeFeng6Hao	G.max	Improved_cultivar	China	BeiJing	116.28E	39.54N	HSu
610	16NF2747_2748	HuangDou8	G.max	Landrace	China	HeBei	114.26E	38.03N	HSu
611	16NF2755_2756	HeiDou	G.max	Landrace	China	HeBei	114.26E	38.03N	HSu
612	16NF2763_2764	HeiDou	G.max	Landrace	China	HeBei	114.26E	38.03N	HSu
613	16NF2765_2766	DaHeiDou	G.max	Landrace	China	HeBei	114.26E	38.03N	HSu
614	16NF2767_2768	DaHeiDou	G.max	Landrace	China	HeBei	114.26E	38.03N	HSu
615	16NF2769_2770	XiaoHeiDou	G.max	Landrace	China	HeBei	114.26E	38.03N	HSu
616	16NF2771_2772	HeiDou	G.max	Landrace	China	HeBei	114.26E	38.03N	HSu
617	16NF2773_2774	XiaoHeiDou16	G.max	Landrace	China	HeBei	114.26E	38.03N	HSu
618	16NF2775_2776	YuanHeiDou	G.max	Landrace	China	HeBei	114.26E	38.03N	HSu
619	16NF2777_2778	SijiaoQiHeiDou	G.max	Landrace	China	HeBei	114.26E	38.03N	HSu
620	16NF2781_2782	BaYueMang	G.max	Landrace	China	HeBei	114.26E	38.03N	HSu
621	16NF2783_2784	DaHeiDou11	G.max	Landrace	China	HeBei	114.26E	38.03N	HSu
622	16NF2787_2788	XiaoHeiDou5	G.max	Landrace	China	HeBei	114.26E	38.03N	HSu
623	16NF2791_2792	JiangSeDou1	G.max	Landrace	China	HeBei	114.26E	38.03N	HSu
624	16NF2793_2794	HongDou1	G.max	Landrace	China	HeBei	114.26E	38.03N	HSu
625	16NF2797_2798	LuDouErHao	G.max	Improved_cultivar	China	ShanDong	120.18E	36.03N	HSu
626	16NF2801_2802	YueJinWuHao	G.max	Improved_cultivar	China	ShanDong	120.18E	36.03N	HSu
627	16NF2805_2806	XiaoLanHua	G.max	Landrace	China	ShanDong	120.18E	36.03N	HSu
628	16NF2807_2808	YaoJiaoHuang2	G.max	Landrace	China	ShanDong	120.18E	36.03N	HSu
629	16NF2811_2812	DaDou1	G.max	Landrace	China	ShanDong	120.18E	36.03N	HSu
630	16NF2837_2838	BaiYouDou	G.max	Landrace	China	ShaanXi	108.55E	34.15N	HSu
631	16NF2851_2852	NiuPiHuangDou	G.max	Landrace	China	ShaanXi	108.55E	34.15N	HSu
632	16NF2853_2854	HuangHuaZao	G.max	Landrace	China	ShaanXi	108.55E	34.15N	HSu
633	16NF2859_2860	BaYueZha3	G.max	Landrace	China	ShaanXi	108.55E	34.15N	HSu
634	16NF2861_2862	HeiGunHuangDou	G.max	Landrace	China	ShaanXi	108.55E	34.15N	HSu
635	16NF2863_2864	HeiDou9	G.max	Landrace	China	ShaanXi	108.55E	34.15N	HSu
636	16NF2869_2870	HongPiDaDou1	G.max	Landrace	China	ShaanXi	108.55E	34.15N	HSu
637	16NF2875_2876	HongHuangDou3	G.max	Landrace	China	ShaanXi	108.55E	34.15N	HSu
638	16NF2879_2880	LaoYeDou	G.max	Landrace	China	ShaanXi	108.55E	34.15N	HSu
639	16NF2881_2882	HuPiDou5	G.max	Landrace	China	ShaanXi	108.55E	34.15N	HSu
640	16NF2883_2884	ZhenZhuAi	G.max	Landrace	China	GanSu	103.50E	36.03N	HSu
641	16NF2889_2890	MaHuangDou	G.max	Landrace	China	GanSu	103.50E	36.03N	HSu
642	16NF2897_2898	SuiXiBaiHuaCao	G.max	Landrace	China	AnHui	117.17E	31.52N	HSu
643	16NF2899_2900	TaiHeYuanGunZhu	G.max	Landrace	China	AnHui	117.17E	31.52N	HSu
644	16NF2905_2906	MengChengBaiJianKe	G.max	Landrace	China	AnHui	117.17E	31.52N	HSu
645	16NF2907_2908	ChuXianDaBaiKe	G.max	Landrace	China	AnHui	117.17E	31.52N	HSu
646	16NF2909_2910	DangShanDaCanKe	G.max	Landrace	China	AnHui	117.17E	31.52N	HSu
647	16NF2925_2926	JiDou4Hao	G.max	Improved_cultivar	China	HeBei	114.26E	38.03N	HSu
648	16NF2929_2930	BeiShuiQuanXiangHuangDou	G.max	Landrace	China	HeBei	114.26E	38.03N	HSu
649	16NF2959_2960	ShuiLangPi	G.max	Landrace	China	ShanDong	120.18E	36.03N	HSu
650	16NF2969_2970	BaiJiaZi	G.max	Landrace	China	ShanDong	120.18E	36.03N	HSu
651	16NF2981_2982	8588	G.max	Improved_cultivar	China	ShanDong	120.18E	36.03N	HSu
652	16NF2983_2984	YanHuangSiHao	G.max	Improved_cultivar	China	ShanDong	120.18E	36.03N	HSu
653	16NF2985_2986	Wei8640-112(LuDou11)	G.max	Improved_cultivar	China	ShanDong	120.18E	36.03N	HSu
654	16NF2989_2990	YuDou11	G.max	Improved_cultivar	China	HeNan	113.40E	34.46N	HSu
655	16NF2993_2994	Zheng492(YuDou22)	G.max	Improved_cultivar	China	HeNan	113.40E	34.46N	HSu
656	16NF2997_2998	HuiLaoShuPi	G.max	Landrace	China	ShaanXi	108.55E	34.15N	HSu
657	16NF3013_3014	ChuXiu	G.max	Improved_cultivar	China	JiangSu	118.75E	32.04N	HSu
658	16NF3021_3022	ChaPiDou	G.max	Landrace	China	AnHui	117.17E	31.52N	HSu
659	16NF3027_3028	DaShuangQing	G.max	Landrace	China	AnHui	117.17E	31.52N	HSu
660	16NF3459_3460	XiangChunDou10	G.max	Improved_cultivar	China	HuNan	112.59E	28.12N	SSu
661	16NF3465_3466	NanNong99-10	G.max	Improved_cultivar	China	JiangSu	118.75E	32.04N	HSu
662	16NF3495_3496	WanDou35	G.max	Improved_cultivar	China	AnHui	117.17E	31.52N	HSu
663	16NF3497_3498	NanNong99-6	G.max	Improved_cultivar	China	JiangSu	118.75E	32.04N	HSu
664	16NF3695_3696	XinLiuQing	G.max	Improved_cultivar	China	AnHui	117.17E	31.52N	HSu
665	16NF4419	ShengLi3Hao	G.max	Landrace	China	ShanDong	120.18E	36.03N	HSu
666	16NF4420	BaYueMang2	G.max	Landrace	China	ShanDong	120.18E	36.03N	HSu
667	16NF4421	BaiHuaCao	G.max	Landrace	China	ShanDong	120.18E	36.03N	HSu
668	16NF4422	SiLiYuan	G.max	Landrace	China	ShanDong	120.18E	36.03N	HSu
669	16NF4423	DaHuangDou2	G.max	Landrace	China	ShanDong	120.18E	36.03N	HSu
670	16NF4426	FangChengCaoHuangDou	G.max	Landrace	China	HeNan	113.40E	34.46N	HSu
671	16NF4454	ZhuaZiTuiHuangDou	G.max	Landrace	China	HeBei	114.26E	38.03N	HSu
672	16NF4457	XinLeiTouChaDou	G.max	Landrace	China	HeBei	114.26E	38.03N	HSu
673	16NF4472	PingDingHuang7	G.max	Landrace	China	ShanDong	120.18E	36.03N	HSu
674	16NF4477	ChaDou2	G.max	Landrace	China	ShanDong	120.18E	36.03N	HSu
675	16NF4480	LuoNingHuangJiaoHeiDaDou	G.max	Landrace	China	HeNan	113.40E	34.46N	HSu
676	16NF4483	JiDou7Hao	G.max	Improved_cultivar	China	HeBei	114.26E	38.03N	HSu
677	16NF4484	LvShunDou	G.max	Landrace	China	ShanDong	120.18E	36.03N	HSu
678	16NF4485	DaHeiDou	G.max	Landrace	China	ShanDong	120.18E	36.03N	HSu
679	16NF4506	GaoZuoXuan1Hao	G.max	Improved_cultivar	China	ShanDong	120.18E	36.03N	HSu
680	16NF4532	BaYueZao	G.max	Landrace	China	ShaanXi	108.55E	34.15N	HSu
681	16NF4533	DaLaoShuPi	G.max	Landrace	China	ShaanXi	108.55E	34.15N	HSu
682	16NF4572	Zheng84240-B1	G.max	Improved_cultivar	China	HeNan	113.40E	34.46N	HSu
683	16NF4580	DaLiHeiDou3	G.max	Landrace	China	ShanDong	120.18E	36.03N	HSu
684	16NF4581	ZhaDou	G.max	Landrace	China	ShanDong	120.18E	36.03N	HSu
685	16NF4582	ZhongHuang4	G.max	Improved_cultivar	China	BeiJing	116.28E	39.54N	HSu
686	16NF4603	ZhongDou32	G.max	Improved_cultivar	China	HuBei	115.32E	30.52N	SSu
687	16NF4630_4631	Zheng8516	G.max	Improved_cultivar	China	HeNan	113.40E	34.46N	HSu
688	16NF4648_4649	GunLongZhu	G.max	Landrace	China	ShanDong	120.18E	36.03N	HSu
689	16NF4711	LuDouSiHao	G.max	Improved_cultivar	China	ShanDong	120.18E	36.03N	HSu
690	16NF4712	YanHuang3Hao	G.max	Improved_cultivar	China	ShanDong	120.18E	36.03N	HSu
691	16NF93_94	A-66jia	G.max	Improved_cultivar	Tailand	NA	100.31E	13.45N	WDD_Su
692	16NF2391_2392	ZheXian4Hao	G.max	Improved_cultivar	China	ZheJiang	120.10E	30.15N	SSu
693	16NF2397_2398	ZheXian5Hao	G.max	Improved_cultivar	China	ZheJiang	120.10E	30.15N	SSu
694	16NF3035_3036	LiuHeHongMaoQingJia	G.max	Landrace	China	JiangSu	118.75E	32.04N	SSp
695	16NF3047_3048	NanTongHuangYouGuoZi	G.max	Landrace	China	JiangSu	118.75E	32.04N	SSp
696	16NF3049_3050	WuChangLiuYueBao	G.max	Landrace	China	HuBei	115.32E	30.52N	SSp
697	16NF3055_3056	LeiBaDou	G.max	Landrace	China	HuBei	115.32E	30.52N	SSp
698	16NF3061_3062	LuXianTiePiDou	G.max	Landrace	China	SiChuan	104.06E	30.67N	SSp
699	16NF3075_3076	XiangDou3Hao	G.max	Improved_cultivar	China	HuNan	112.59E	28.12N	SSp
700	16NF3087_3088	TianBaDou	G.max	Landrace	China	SiChuan	104.06E	30.67N	SSp
701	16NF3091_3092	HuangMaoMao	G.max	Landrace	China	SiChuan	104.06E	30.67N	SSp
702	16NF3099_3100	LinShuiDongDou	G.max	Landrace	China	SiChuan	104.06E	30.67N	SSp
703	16NF3111_3112	BaoXingJingDeHuang	G.max	Landrace	China	SiChuan	104.06E	30.67N	SSp
704	16NF3121_3122	SiChuanQingPiDou	G.max	Landrace	China	SiChuan	104.06E	30.67N	SSp
705	16NF3123_3124	PengXiLiuYueHuang	G.max	Landrace	China	SiChuan	104.06E	30.67N	SSp
706	16NF3127_3128	LongChangDaHeiDou	G.max	Landrace	China	SiChuan	104.06E	30.67N	SSp
707	16NF3169_3170	QingPiDou1	G.max	Landrace	China	SiChuan	104.06E	30.67N	SSp
708	16NF3177_3178	HongHuangDou2	G.max	Landrace	China	SiChuan	104.06E	30.67N	SSp
709	16NF3181_3182	ZiDou	G.max	Landrace	China	ZheJiang	120.10E	30.15N	SSp
710	16NF3203_3204	YouXianHeDou	G.max	Landrace	China	HuNan	112.59E	28.12N	SSp
711	16NF3205_3206	LianYuanHuPiDou	G.max	Landrace	China	HuNan	112.59E	28.12N	SSp
712	16NF3211_3212	GuiChiNiuMaoHuang	G.max	Landrace	China	AnHui	117.17E	31.52N	SSp
713	16NF3213_3214	LiuYueBao	G.max	Landrace	China	AnHui	117.17E	31.52N	SSp
714	16NF3219_3220	XiDou3Hao	G.max	Improved_cultivar	China	SiChuan	104.06E	30.67N	SSp
715	16NF3227_3228	DaHuangMao	G.max	Landrace	China	SiChuan	104.06E	30.67N	SSp
716	16NF3229_3230	BenDiHuangDou	G.max	Landrace	China	SiChuan	104.06E	30.67N	SSp
717	16NF3231_3232	HeiDouZi1	G.max	Landrace	China	SiChuan	104.06E	30.67N	SSp
718	16NF3251_3252	KaiXianHeiZaoDou	G.max	Landrace	China	SiChuan	104.06E	30.67N	SSp
719	16NF3253_3254	PengXianHeiPiDou	G.max	Landrace	China	SiChuan	104.06E	30.67N	SSp
720	16NF3255_3256	YouYangDaHeiDou	G.max	Landrace	China	SiChuan	104.06E	30.67N	SSp
721	16NF3259_3260	ZheChun3Hao	G.max	Improved_cultivar	China	ZheJiang	120.10E	30.15N	SSp
722	16NF3261_3262	JiangXiDou	G.max	Landrace	China	ZheJiang	120.10E	30.15N	SSu
723	16NF3275_3276	GaoQiaoHeDou2	G.max	Landrace	China	HuNan	112.59E	28.12N	SSp
724	16NF3279_3280	GuTianDou	G.max	Landrace	China	FuJian	118.04E	24.26N	SSp
725	16NF3283_3284	DaPuDou	G.max	Landrace	China	FuJian	118.04E	24.26N	SSp
726	16NF3297_3298	HeiKeDou	G.max	Landrace	China	GuiZhou	106.72E	26.57N	SSp
727	16NF3299_3300	MaoJiHui	G.max	Landrace	China	GuiZhou	106.72E	26.57N	SSp
728	16NF3301_3302	BaiMaoDou3	G.max	Landrace	China	GuiZhou	106.72E	26.57N	SSp
729	16NF3311_3312	DouYaDou	G.max	Landrace	China	GuiZhou	106.72E	26.57N	SSp
730	16NF3313_3314	QiChuanDou	G.max	Landrace	China	GuiZhou	106.72E	26.57N	SSp
731	16NF3315_3316	LiuYueZaoHuangDou	G.max	Landrace	China	GuiZhou	106.72E	26.57N	SSp
732	16NF3321_3322	HuaLianDou1	G.max	Landrace	China	GuiZhou	106.72E	26.57N	SSp
733	16NF3333_3334	HuaMaoDou	G.max	Landrace	China	FuJian	118.04E	24.26N	SSp
734	16NF3341_3342	XiHuangDou-15	G.max	Landrace	China	GuiZhou	106.72E	26.57N	SSp
735	16NF3347_3348	DaBaiShuiDou-2	G.max	Landrace	China	GuiZhou	106.72E	26.57N	SSp
736	16NF3355_3356	DaBaiShuiDou2	G.max	Landrace	China	GuiZhou	106.72E	26.57N	SSp
737	16NF3363_3364	HuangMaoDou-3	G.max	Landrace	China	GuiZhou	106.72E	26.57N	SSp
738	16NF3365_3366	BaoGuHuang-8	G.max	Landrace	China	GuiZhou	106.72E	26.57N	SSp
739	16NF3393_3394	LuoDingQingDou	G.max	Landrace	China	GuangDong	113.18E	23.10N	SSp
740	16NF3399_3400	ChaShanHeiDou	G.max	Landrace	China	GuangDong	113.18E	23.10N	SSp
741	16NF3405_3406	QiongHaiHeiDou	G.max	Landrace	China	HaiNan	111.10E	20.03N	SSp
742	16NF3417_3418	TianLinPingTangZaoHuangDou	G.max	Landrace	China	GuangXi	108.21E	22.47N	SSp
743	16NF3423_3424	HeiDou17	G.max	Landrace	China	GuangXi	108.21E	22.47N	SSp
744	16NF3441_3442	HongXingDaGeWu	G.max	Landrace	China	GuangDong	113.18E	23.10N	SSp
745	16NF3449_3450	GongDou10Hao	G.max	Improved_cultivar	China	SiChuan	104.06E	30.67N	SSu
746	16NF3451_3452	TaiWan75(Lv75)	G.max	Improved_cultivar	China	TaiWan	121.31E	25.02N	SSu
747	16NF3489_3490	GanDou2Hao	G.max	Improved_cultivar	China	JiangXi	115.53E	28.42N	SSu
748	16NF3491_3492	GuiZao1Hao	G.max	Improved_cultivar	China	GuangXi	108.21E	22.47N	SSu
749	16NF3519_3520	XiangChunDou26	G.max	Improved_cultivar	China	HuNan	112.59E	28.12N	SSu
750	16NF3523_3524	ChunHua5Hao	G.max	Improved_cultivar	China	JiangSu	118.75E	32.04N	SSu
751	16NF3537_3538	Hai'AnCiYuDou1	G.max	Landrace	China	JiangSu	118.75E	32.04N	SSu
752	16NF3555_3556	RuDongWanLvHuangDouJia	G.max	Landrace	China	JiangSu	118.75E	32.04N	SSu
753	16NF3563_3564	ShaZhouDanHuangDou	G.max	Landrace	China	JiangSu	118.75E	32.04N	SSu
754	16NF3573_3574	QingPi3	G.max	Landrace	China	AnHui	117.17E	31.52N	SSu
755	16NF3585_3586	FengXianHuiDaoHuang	G.max	Landrace	China	ShangHai	121.43E	34.50N	SSu
756	16NF3587_3588	E'Dou2Hao	G.max	Improved_cultivar	China	HuBei	115.32E	30.52N	SSu
757	16NF3589_3590	TianMenDaZiHuang	G.max	Landrace	China	HuBei	115.32E	30.52N	SSu
758	16NF3591_3592	XiangYangBaYueZha	G.max	Landrace	China	HuBei	115.32E	30.52N	SSu
759	16NF3613_3614	XiaoGanDou	G.max	Landrace	China	HuBei	115.32E	30.52N	SSu
760	16NF3617_3618	YingShanDaLiHuang	G.max	Landrace	China	HuBei	115.32E	30.52N	SSu
761	16NF3621_3622	HuangBeiShanZiBai	G.max	Landrace	China	HuBei	115.32E	30.52N	SSu
762	16NF3623_3624	JingMenShuHouZi	G.max	Landrace	China	HuBei	115.32E	30.52N	SSu
763	16NF3629_3630	AnLuHeiHuangDou	G.max	Landrace	China	HuBei	115.32E	30.52N	SSu
764	16NF3631_3632	TongShanDaLiJiangPiHuang	G.max	Landrace	China	HuBei	115.32E	30.52N	SSu
765	16NF3635_3636	JingShanBu'AoDou	G.max	Landrace	China	HuBei	115.32E	30.52N	SSu
766	16NF3639_3640	YouDou	G.max	Landrace	China	ZheJiang	120.10E	30.15N	SSu
767	16NF3651_3652	LiuYueBai	G.max	Landrace	China	ZheJiang	120.10E	30.15N	SSu
768	16NF3667_3668	JiuYueBa	G.max	Landrace	China	ZheJiang	120.10E	30.15N	SSu
769	16NF3669_3670	QingKeDou	G.max	Landrace	China	ZheJiang	120.10E	30.15N	SSu
770	16NF3671_3672	QingPiDou9	G.max	Landrace	China	ZheJiang	120.10E	30.15N	SSu
771	16NF3673_3674	HeiDaDou2	G.max	Landrace	China	ZheJiang	120.10E	30.15N	SSu
772	16NF3675_3676	WuDaDou	G.max	Landrace	China	ZheJiang	120.10E	30.15N	SSu
773	16NF3689_3690	XingHuaMaoJiaDouJia	G.max	Landrace	China	JiangSu	118.75E	32.04N	SSu
774	16NF3697_3698	ZaoHongDou	G.max	Landrace	China	ShangHai	121.43E	34.50N	SSu
775	16NF3703_3704	82-16	G.max	Improved_cultivar	China	HuBei	115.32E	30.52N	SSu
776	16NF3705_3706	74-424	G.max	Improved_cultivar	China	HuBei	115.32E	30.52N	SSu
777	16NF3709_3710	JingDou26	G.max	Landrace	China	HuBei	115.32E	30.52N	SSu
778	16NF3717_3718	HouWeiLie2	G.max	Landrace	China	HuBei	115.32E	30.52N	SSu
779	16NF3729_3730	ChiHuangDou1	G.max	Landrace	China	HuBei	115.32E	30.52N	SSu
780	16NF3733_3734	JiuYueHan	G.max	Landrace	China	HuBei	115.32E	30.52N	SSu
781	16NF3737_3738	HeiHuangDou2	G.max	Landrace	China	HuBei	115.32E	30.52N	SSu
782	16NF3743_3744	HeiNiDou	G.max	Landrace	China	HuBei	115.32E	30.52N	SSu
783	16NF3745_3746	LvKeDou	G.max	Landrace	China	HuBei	115.32E	30.52N	SSu
784	16NF3749_3750	JiuYueBao	G.max	Landrace	China	HuBei	115.32E	30.52N	SSu
785	16NF3755_3756	ZhuanJinLou	G.max	Landrace	China	HuBei	115.32E	30.52N	SSu
786	16NF3757_3758	DaHuaDou	G.max	Landrace	China	SiChuan	104.06E	30.67N	SSu
787	16NF3791_3792	ChengNanZaoDou-2	G.max	Landrace	China	SiChuan	104.06E	30.67N	SSu
788	16NF3803_3804	LiuYueHuang2	G.max	Landrace	China	SiChuan	104.06E	30.67N	SSu
789	16NF3805_3806	GuanGeXiaoDongDou	G.max	Landrace	China	SiChuan	104.06E	30.67N	SSu
790	16NF3809_3810	BaiShuiDou2	G.max	Landrace	China	SiChuan	104.06E	30.67N	SSu
791	16NF3821_3822	ZaoHuangDou-2	G.max	Landrace	China	SiChuan	104.06E	30.67N	SSu
792	16NF3825_3826	LvDouZi	G.max	Landrace	China	SiChuan	104.06E	30.67N	SSu
793	16NF3827_3828	QingPiDou2	G.max	Landrace	China	SiChuan	104.06E	30.67N	SSu
794	16NF3829_3830	GaoShanDou	G.max	Landrace	China	SiChuan	104.06E	30.67N	SSu
795	16NF3833_3834	HeiDouZi2	G.max	Landrace	China	SiChuan	104.06E	30.67N	SSu
796	16NF3835_3836	XiaoHeiDou19	G.max	Landrace	China	SiChuan	104.06E	30.67N	SSu
797	16NF3837_3838	HeiYaoDou	G.max	Landrace	China	SiChuan	104.06E	30.67N	SSu
798	16NF3851_3852	HeShaoChaDou	G.max	Landrace	China	SiChuan	104.06E	30.67N	SSu
799	16NF3853_3854	BianZiJiangSeDou	G.max	Landrace	China	SiChuan	104.06E	30.67N	SSu
800	16NF3855_3856	HuaDaDou	G.max	Landrace	China	SiChuan	104.06E	30.67N	SSu
801	16NF3857_3858	HuaLianDou2	G.max	Landrace	China	SiChuan	104.06E	30.67N	SSu
802	16NF3891_3892	ShiMenDaBaiLi	G.max	Landrace	China	HuNan	112.59E	28.12N	SSu
803	16NF3893_3894	QianJiaZhouHuangDou	G.max	Landrace	China	HuNan	112.59E	28.12N	SSu
804	16NF3899_3900	JinNanHuangDou	G.max	Landrace	China	HuNan	112.59E	28.12N	SSu
805	16NF3901_3902	SuiNingBaYueHuang<Yi>	G.max	Landrace	China	HuNan	112.59E	28.12N	SSu
806	16NF3909_3910	LongShanHeiPiDou	G.max	Landrace	China	HuNan	112.59E	28.12N	SSu
807	16NF3911_3912	XinHuangHeiDou	G.max	Landrace	China	HuNan	112.59E	28.12N	SSu
808	16NF3913_3914	JunShanDaQingDou	G.max	Landrace	China	HuNan	112.59E	28.12N	SSu
809	16NF3915_3916	BaoJingChaHuangDou	G.max	Landrace	China	HuNan	112.59E	28.12N	SSu
810	16NF3917_3918	ShaShiHeNanDou	G.max	Landrace	China	HuNan	112.59E	28.12N	SSu
811	16NF3921_3922	ZaoHuangDou-7	G.max	Landrace	China	GuiZhou	106.72E	26.57N	SSu
812	16NF3925_3926	BaiDouZi	G.max	Landrace	China	GuiZhou	106.72E	26.57N	SSu
813	16NF3927_3928	HuangPiDaDou	G.max	Landrace	China	GuiZhou	106.72E	26.57N	SSu
814	16NF3929_3930	QingPiDou5	G.max	Landrace	China	GuiZhou	106.72E	26.57N	SSu
815	16NF3931_3932	XiaoHuangDou9	G.max	Landrace	China	GuiZhou	106.72E	26.57N	SSu
816	16NF3941_3942	LiuYueMang	G.max	Landrace	China	GuiZhou	106.72E	26.57N	SSu
817	16NF3955_3956	ZongZiDou-5	G.max	Landrace	China	GuiZhou	106.72E	26.57N	SSu
818	16NF3957_3958	HuangDouZi-4	G.max	Landrace	China	GuiZhou	106.72E	26.57N	SSu
819	16NF3959_3960	ZongZiDou	G.max	Landrace	China	GuiZhou	106.72E	26.57N	SSu
820	16NF3971_3972	ChunHeiDou	G.max	Landrace	China	GuangDong	113.18E	23.10N	SSu
821	16NF3983_3984	77-27	G.max	Landrace	China	GuangXi	108.21E	22.47N	SSu
822	16NF3987_3988	FengShanBaYueDou	G.max	Landrace	China	GuangXi	108.21E	22.47N	SSu
823	16NF3993_3994	LuoXuPingGuoHuangDou	G.max	Landrace	China	GuangXi	108.21E	22.47N	SSu
824	16NF4003_4004	ShangShuHuangDou	G.max	Landrace	China	GuangXi	108.21E	22.47N	SSu
825	16NF4007_4008	ShiYaHuang	G.max	Landrace	China	GuangXi	108.21E	22.47N	SSu
826	16NF4019_4020	LiuYueHuang1	G.max	Landrace	China	YunNan	102.42E	25.03N	SSu
827	16NF4023_4024	SiJiDou	G.max	Landrace	China	YunNan	102.42E	25.03N	SSu
828	16NF4025_4026	DaDou2	G.max	Landrace	China	YunNan	102.42E	25.03N	SSu
829	16NF4027_4028	DongDaDou	G.max	Landrace	China	YunNan	102.42E	25.03N	SSu
830	16NF4049_4050	HeiHuangDou1	G.max	Landrace	China	YunNan	102.42E	25.03N	SSu
831	16NF4051_4052	XiaoHeiDou11	G.max	Landrace	China	YunNan	102.42E	25.03N	SSu
832	16NF4067_4068	JiuLiXiang	G.max	Landrace	China	JiangSu	118.75E	32.04N	SSu
833	16NF4069_4070	LiYangPoPiFeng	G.max	Landrace	China	JiangSu	118.75E	32.04N	SSu
834	16NF4071_4072	BaYueHuang4	G.max	Landrace	China	AnHui	117.17E	31.52N	SSu
835	16NF4079_4080	FengPiQing	G.max	Landrace	China	AnHui	117.17E	31.52N	SSu
836	16NF4081_4082	ChangLinQingDou	G.max	Landrace	China	AnHui	117.17E	31.52N	SSu
837	16NF4095_4096	ZhongDou14	G.max	Improved_cultivar	China	HuBei	115.32E	30.52N	SSu
838	16NF4099_4100	NiuKenZhuang	G.max	Landrace	China	HuBei	115.32E	30.52N	SSu
839	16NF4107_4108	WuHuangDou	G.max	Landrace	China	HuBei	115.32E	30.52N	SSu
840	16NF4109_4110	NiBaDou	G.max	Landrace	China	HuBei	115.32E	30.52N	SSu
841	16NF4119_4120	BaiHuaHuangPi	G.max	Landrace	China	FuJian	118.04E	24.26N	SSu
842	16NF4127_4128	XiaoHuangDou-2	G.max	Landrace	China	FuJian	118.04E	24.26N	SSu
843	16NF4139_4140	HeiPiDaDou2	G.max	Landrace	China	FuJian	118.04E	24.26N	SSu
844	16NF4141_4142	FengXiWuDouZai	G.max	Landrace	China	FuJian	118.04E	24.26N	SSu
845	16NF4143_4144	QiaoShiBaYueHuang	G.max	Landrace	China	HuNan	112.59E	28.12N	SSu
846	16NF4145_4146	ChenXiQingPiDou1	G.max	Landrace	China	HuNan	112.59E	28.12N	SSu
847	16NF4147_4148	HengYangQingPiDou	G.max	Landrace	China	HuNan	112.59E	28.12N	SSu
848	16NF4149_4150	XinQiaoHeiDou	G.max	Landrace	China	HuNan	112.59E	28.12N	SSu
849	16NF4153_4154	ZiHuaDongHuangDou	G.max	Landrace	China	HuNan	112.59E	28.12N	SSu
850	16NF4155_4156	GuLuoHeDou	G.max	Landrace	China	HuNan	112.59E	28.12N	SSu
851	16NF4157_4158	YeZhuHeDou	G.max	Landrace	China	HuNan	112.59E	28.12N	SSu
852	16NF4165_4166	LanRenDou-4	G.max	Landrace	China	GuangDong	113.18E	23.10N	SSu
853	16NF4171_4172	TaiYuDaQingDou1	G.max	Landrace	China	GuangXi	108.21E	22.47N	SSu
854	16NF4173_4174	LiuYueHuang4	G.max	Landrace	China	YunNan	102.42E	25.03N	SSu
855	16NF4175_4176	XiaoLvDou	G.max	Landrace	China	YunNan	102.42E	25.03N	SSu
856	16NF4179_4180	XiaoHeiDou21	G.max	Landrace	China	YunNan	102.42E	25.03N	SSu
857	16NF4181_4182	HeiPiDaDou1	G.max	Landrace	China	YunNan	102.42E	25.03N	SSu
858	16NF4191_4192	BaiMaoJian	G.max	Landrace	China	ZheJiang	120.10E	30.15N	SAu
859	16NF4197_4198	MaLiaoDou	G.max	Landrace	China	ZheJiang	120.10E	30.15N	SAu
860	16NF4209_4210	ZhangPingQingRenWu	G.max	Landrace	China	FuJian	118.04E	24.26N	SAu
861	16NF4225_4226	WuGuMaoDou	G.max	Landrace	China	ZheJiang	120.10E	30.15N	SAu
862	16NF4227_4228	QingPiDou3	G.max	Landrace	China	ZheJiang	120.10E	30.15N	SAu
863	16NF4233_4234	BaiQiu1Hao	G.max	Improved_cultivar	China	FuJian	118.04E	24.26N	SAu
864	16NF4235_4236	PingNanChengGuanShanDou	G.max	Landrace	China	FuJian	118.04E	24.26N	SAu
865	16NF4241_4242	Gao'AnBaYueHuang	G.max	Landrace	China	JiangXi	115.53E	28.42N	SAu
866	16NF4253_4254	JinXiNiuPiDou	G.max	Landrace	China	JiangXi	115.53E	28.42N	SAu
867	16NF4259_4260	YiZhangHeGenDou	G.max	Landrace	China	HuNan	112.59E	28.12N	SAu
868	16NF4261_4262	HengYangNiDou	G.max	Landrace	China	HuNan	112.59E	28.12N	SAu
869	16NF4267_4268	XiZangDaDou5	G.max	Landrace	China	Tibet	91.06E	29.36N	SAu
870	16NF4277_4278	MiaoXiaDaDou	G.max	Landrace	China	ZheJiang	120.10E	30.15N	SAu
871	16NF4279_4280	HaiNingHuangDou	G.max	Landrace	China	ZheJiang	120.10E	30.15N	SAu
872	16NF4285_4286	HuZhenHeiDou	G.max	Landrace	China	ZheJiang	120.10E	30.15N	SAu
873	16NF4287_4288	HuangTianYangDou	G.max	Landrace	China	JiangXi	115.53E	28.42N	SAu
874	16NF4293_4294	JiShuiDaLiChaDou	G.max	Landrace	China	JiangXi	115.53E	28.42N	SAu
875	16NF4488	BaiMaoDou2	G.max	Landrace	China	GuiZhou	106.72E	26.57N	SSp
876	16NF4489	LiuYueZao-1	G.max	Landrace	China	SiChuan	104.06E	30.67N	SSp
877	16NF4490	PuDou451	G.max	Improved_cultivar	China	FuJian	118.04E	24.26N	SSp
878	16NF4491	ErJiZaoDou-2	G.max	Landrace	China	GuiZhou	106.72E	26.57N	SSp
879	16NF4556	XinYiHeiDou	G.max	Landrace	China	GuangDong	113.18E	23.10N	SSp
880	16NF4559	TaiXingHeiDou	G.max	Landrace	China	JiangSu	118.75E	32.04N	SSp
881	16NF4585	ZaoHuangDou-1	G.max	Landrace	China	SiChuan	104.06E	30.67N	SSp
882	16NF4591	XiHuangDou-8	G.max	Landrace	China	GuiZhou	106.72E	26.57N	SSp
883	16NF4595	QiYueHuang-1	G.max	Landrace	China	GuiZhou	106.72E	26.57N	SSu
884	16NF4624_4625	QuanBian11	G.max	Improved_cultivar	China	FuJian	118.04E	24.26N	SSp
885	16NF4664_4665	DaQingRen	G.max	Improved_cultivar	China	FuJian	118.04E	24.26N	SSp
886	16NF4668_4669	8307	G.max	Improved_cultivar	China	SiChuan	104.06E	30.67N	SSp
887	16NF3969_3970	FengShunXiaoHeiDou	G.max	Landrace	China	GuangDong	113.18E	23.10N	SSu
888	16NF4033_4034	HuangLiDou	G.max	Landrace	China	YunNan	102.42E	25.03N	SSu
889	16NF4297_4298	DongZe11	G.max	Improved_cultivar	China	HeiLongJiang	126.64E	45.76N	NESp
890	16NF4725	MN0201	G.max	Improved_cultivar	United_States	NA	74.25W	40.69N	WDD_Su
891	16NF4726	Traill	G.max	Improved_cultivar	United_States	North Dakota	100.46W	46.48N	WDD_Su
892	16NF581_582	Surge	G.max	Improved_cultivar	United_States	South Dakota	100.20W	44.42N	WDD_Su
893	16NF4728	Harlon	G.max	Improved_cultivar	United_States	NA	74.25W	40.69N	WDD_Sp
894	16NF3741_3742	HeiDaDou4	G.max	Landrace	China	HuBei	115.32E	30.52N	SSu
895	16NF4730	Titan	G.max	Improved_cultivar	United_States	Michigan	90.76W	44.92N	WDD_Su
896	16NF4731	Holt	G.max	Improved_cultivar	United_States	Nebraska	104.17W	41.42N	WDD_Sp
897	16NF4734	Flint	G.max	Improved_cultivar	United_States	Ohio	84.91W	40.34N	WDD_Su
898	16NF4735	Burlison	G.max	Improved_cultivar	United_States	Illinois	98.46W	47.97N	WDD_Sp
899	16NF4736	Athow	G.max	Improved_cultivar	United_States	Indiana	79.15W	40.61N	WDD_Sp
900	16NF4737	Zane	G.max	Improved_cultivar	United_States	Ohio	84.91W	40.34N	WDD_Sp
901	16NF4739	Saline	G.max	Improved_cultivar	United_States	NA	74.25W	40.69N	WDD_Sp
902	16NF4740	NS93-4118	G.max	Improved_cultivar	United_States	NA	74.25W	40.69N	WDD_Sp
903	16NF4741	Flyer	G.max	Improved_cultivar	United_States	Ohio	84.91W	40.34N	WDD_Sp
904	16NF4742	TN4-94	G.max	Improved_cultivar	United_States	NA	74.25W	40.69N	WDD_Su
905	16NF4744	Holladay	G.max	Improved_cultivar	United_States	NA	74.25W	40.69N	WDD_Sp
906	16NF615_616	Rhodes	G.max	Improved_cultivar	United_States	Missouri	96.92W	38.22N	WDD_Sp
907	16NF619_620	Dillon	G.max	Improved_cultivar	United_States	South Carolina	83.17W	33.60N	WDD_Sp
908	16NF621_622	NC-Roy	G.max	Improved_cultivar	United_States	North Carolina	84.35W	35.10N	WDD_Sp
909	16NF623_624	Musen	G.max	Improved_cultivar	United_States	South Carolina	83.17W	33.60N	WDD_Su
910	16NF625_626	Stonewall	G.max	Improved_cultivar	United_States	Alabama	78.23W	43.06N	WDD_Su
911	16NF627_628	Benning	G.max	Improved_cultivar	United_States	Georgia	73.07W	44.44N	WDD_Sp
912	QLJ7	DongNong36Hao	G.max	Improved_cultivar	China	HeiLongJiang	126.64E	45.76N	NESp
913	Suinong14	SuiNong14	G.max	Improved_cultivar	China	HeiLongJiang	126.64E	45.76N	NESp
914	TSZY64	JiYu71	G.max	Improved_cultivar	China	JiLin	125.18E	43.55N	NESp
915	Z29	XiaoHeiDou(YingXianXiaoHeiDou)	G.max	Landrace	China	ShanXi	112.33E	37.51N	NSp
916	Z36	DaHeiDou8	G.max	Landrace	China	ShanXi	112.33E	37.51N	NSp
917	Z39	HeiHeiDou1	G.max	Landrace	China	ShanXi	112.33E	37.51N	NSp
918	Z40	DaHeiDou10	G.max	Landrace	China	ShanXi	112.33E	37.51N	NSp
919	Z43	XiaoHeiDou22	G.max	Landrace	China	ShanXi	112.33E	37.51N	NSp
920	Z44	PingDingXiaoHeiDou	G.max	Landrace	China	ShanXi	112.33E	37.51N	NSp
921	Z47	HeiHeiDou2	G.max	Landrace	China	ShanXi	112.33E	37.51N	NSp
922	Z51	XiaoHeiDou23	G.max	Landrace	China	ShanXi	112.33E	37.51N	NSp
923	Z78	DaiMiDou	G.max	Landrace	China	HuBei	115.32E	30.52N	SSu
924	Z95	XiaoLiHeiDou	G.max	Landrace	China	HuBei	115.32E	30.52N	SSu
925	Z118	WangZhuangHeiDou	G.max	Landrace	China	ShanXi	112.33E	37.51N	NSp
926	Z128	BaYueZhaHeiDou	G.max	Landrace	China	ShanXi	112.33E	37.51N	NSp
927	Z131	HongChaDou	G.max	Landrace	China	ShanXi	112.33E	37.51N	NSp
928	Z156	KangXian2Hao	G.max	Improved_cultivar	China	HeiLongJiang	126.64E	45.76N	NESp
929	Z184	ShiDaDou1Hao	G.max	Improved_cultivar	China	XinJiang	87.36E	43.46N	NSp
930	Z188	GongDou7Hao	G.max	Improved_cultivar	China	SiChuan	104.06E	30.67N	SSp
931	LYH74	ShaHeHuangDou	G.max	Landrace	China	BeiJing	116.28E	39.54N	NSp
932	LYH85	HeHeiDou	G.max	Landrace	China	ShanXi	112.33E	37.51N	NSp
933	QLJ57	HeiHe45	G.max	Improved_cultivar	China	HeiLongJiang	126.64E	45.76N	NESp
934	QLJ96	DengKe1Hao	G.max	Improved_cultivar	China	NeiMengGu	111.65E	40.82N	NESp
935	QLJ146	ZhongDou24(82-14)	G.max	Improved_cultivar	China	HuBei	115.32E	30.52N	SSu
936	QLJ148	SiDou2Hao	G.max	Improved_cultivar	China	JiangSu	118.75E	32.04N	HSu
937	QLJ159	WanDou28	G.max	Improved_cultivar	China	AnHui	117.17E	31.52N	HSu
938	HF37	HeFeng37	G.max	Improved_cultivar	China	HeiLongJiang	126.64E	45.76N	NESp
939	16NF195_196	TGX560-3D	G.max	Improved_cultivar	NA	NA	74.25W	40.69N	WDD_Sp
940	16NF357_358	Kunitz	G.max	Improved_cultivar	United_States	Illinois	98.46W	47.97N	WDD_Sp
941	16NF4588	Foster	G.max	Improved_cultivar	United_States	Florida	92.83W	27.32N	WDD_Su
942	16NF1389_1390	DongNong42	G.max	Improved_cultivar	China	HeiLongJiang	126.64E	45.76N	NESp
943	16NF1453	HeFeng41	G.max	Improved_cultivar	China	HeiLongJiang	126.64E	45.76N	NESp
944	16NF1455_1456	HeFeng42	G.max	Improved_cultivar	China	HeiLongJiang	126.64E	45.76N	NESp
945	16NF1457	HeFeng47	G.max	Improved_cultivar	China	HeiLongJiang	126.64E	45.76N	NESp
946	16NF1547_1548	HeFeng50	G.max	Improved_cultivar	China	HeiLongJiang	126.64E	45.76N	NESp
947	16NF1549_1550	HeFeng52	G.max	Improved_cultivar	China	HeiLongJiang	126.64E	45.76N	NESp
948	16NF1551_1552	HeFeng55	G.max	Improved_cultivar	China	HeiLongJiang	126.64E	45.76N	NESp
949	16NF1553_1554	SuiNong26	G.max	Improved_cultivar	China	HeiLongJiang	126.64E	45.76N	NESp
950	16NF1555_1556	SuiNong28	G.max	Improved_cultivar	China	HeiLongJiang	126.64E	45.76N	NESp
951	16NF2261_2262	ZhongPin661	G.max	Improved_cultivar	China	BeiJing	116.28E	39.54N	HSu

## Sheet: Table S3
Table S3 Phenotypes of EL in Different Conditions
Phenotype	2016_ELS	2020_ELS	2016_ELT	2020_ELT
16NF1_2	3	2.18	4	1.38
16NF1005_1006	3	2.64	2.5	NA
16NF1007_1008	2.83333	2.16	3.16667	NA
16NF101_102	2.66667	0.92	2.83333	2.04
16NF1011_1012	2.5	2.2	3.66667	NA
16NF1013_1014	3	2.66	2.83333	NA
16NF1015_1016	2.5	2.14	2.33333	NA
16NF1017_1018	3.5	1.64	2.5	3.4
16NF1021_1022	2.33333	1.56	3.5	3.2
16NF1025_1026	2	1.76	3.16667	NA
16NF103_104	2	1.52	3.5	2.8
16NF1031_1032	2.16667	1.02	2.5	1.9
16NF1035_1036	2.16667	2.28	2.16667	3.7
16NF1039_1040	3.66667	2	4	3.48
16NF1043_1044	1.83333	1.42	2.16667	3.1
16NF1047_1048	2.33333	1.4	1.83333	2.8
16NF1049_1050	3.16667	2.32	2.33333	2.06
16NF1051_1052	3.5	1.98	2.83333	2.02
16NF1053_1054	2.33333	1.48	3.16667	4.66
16NF1059_1060	2	1.3	3.16667	2
16NF1061_1062	1.83333	1.18	2.66667	2.2
16NF1069_1070	2.5	1.28	2.5	NA
16NF107_108	2	1	3	2.48
16NF1083_1084	2.16667	1.66	2.83333	2.78
16NF1085_1086	2.66667	1.52	3.33333	3.04
16NF109_110	2.33333	2.2	3	2.06
16NF1091_1092	2.4	1.96	3.16667	3.38
16NF1093_1094	2.3	1.74	3.16667	2.68
16NF1095_1096	1.83333	0.84	2.83333	2.54
16NF1099_1100	2	1.92	3.33333	3.62
16NF1101_1102	3.33333	2	4.33333	2.88
16NF1105_1106	2.66667	2.08	3.56667	3.748
16NF1107_1108	2.83333	1.78	3.16667	3.688
16NF1113_1114	3.33333	1.44	3.5	1.06
16NF1117_1118	3.16667	1.56	3	2.44
16NF1119_1120	2.16667	0.92	3.25	1.82
16NF1121_1122	2	1.3	3	1.32
16NF1127_1128	1.33333	2.04	1.75	1.2
16NF113_114	2.5	1.92	3.16667	2.76
16NF1131_1132	2.5	2.28	3.25	3.38
16NF1133_1134	2.33333	1.18	3.25	NA
16NF1135_1136	3	1.9	4.75	NA
16NF1147_1148	1.83333	1.34	2.25	3.14
16NF1159_1160	2.5	1.24	3.16667	3.34
16NF1163_1164	2	1.54	3.16667	2.74
16NF1167_1168	2.16667	1.5	3	3.28
16NF117_118	2.83333	2.04	4	1.958
16NF1171_1172	1.5	1	1.83333	2.44
16NF1189_1190	2.5	1.72	2.5	3.84
16NF1195_1196	1.66667	1.88	2.83333	3.08
16NF1197_1198	2	1.7	2.16667	2.38
16NF1199_1200	2.5	2.02	3.83333	2.22
16NF1203_1204	2.5	1.6	3.16667	3.4
16NF1209_1210	2.16667	1.36	4.16667	2.44
16NF121_122	2.16667	1.4	2.83333	1.6
16NF1215_1216	2.33333	1.72	3.66667	2.01
16NF1217_1218	1.66667	1.04	2.66667	1.14
16NF123_124	3	1.86	2.66667	2.7
16NF1235_1236	4.16667	1.42	4.5	NA
16NF1243_1244	3	2.16	3.66667	NA
16NF1245_1246	2.5	2.12	2.9	NA
16NF125_126	2.33333	0.68	3	0.96
16NF1253_1254	2.9	2.06	3.16667	3.58
16NF1255_1256	2.5	1.8	3.66667	3.7
16NF127_128	3.66667	1.88	3.66667	3.3
16NF1287_1288	2.33333	1.9	2.83333	NA
16NF131_132	1.5	0.58	2.16667	1.2
16NF1311_1312	2.33333	2	2.66667	2.9
16NF1315_1316	2.66667	1.3	3.33333	3.3
16NF1317_1318	3.33333	2.26	3.33333	3.62
16NF1327_1328	2.16667	0.84	3.16667	2.84
16NF133_134	1.83333	1.04	3.33333	1.74
16NF1333_1334	1.5	1.04	3.5	2.42
16NF1335_1336	2	1.38	2.66667	2.36
16NF1341_1342	3.5	2.36	3.5	NA
16NF1343_1344	2.5	2.26	3	NA
16NF1349_1350	2.83333	2.62	4	NA
16NF1351_1352	2.16667	1.98	3.16667	3.248
16NF1353_1354	2.66667	2.5	3.16667	NA
16NF1355_1356	3	4.1	3.83333	NA
16NF1363_1364	2.16667	1.4	3.16667	2.56
16NF137_138	2.5	1.66	3	1.8
16NF1379_1380	2.16667	1.72	3	3.34
16NF1383_1384	2.5	1.54	2.66667	NA
16NF1385_1386	2	1.44	2.66667	2.64
16NF1387_1388	2.5	1.86	2.66667	3.7
16NF1389_1390	3.33333	2.8	3.83333	NA
16NF1397_1398	1.83333	1.96	2.83333	NA
16NF1399_1400	2.83333	1.96	3.33333	NA
16NF1403_1404	3.33333	2.92	3.75	NA
16NF1407	4.16667	4.26	5	NA
16NF1409	5.5	2.88	3.5	NA
16NF1413_1414	2.83333	1.96	4.16667	NA
16NF1421_1422	2.33333	1.36	3.33333	NA
16NF1423_1424	2.66667	1.66	4	NA
16NF1441_1442	2.1	2.04	2.83333	NA
16NF1443_1444	3.5	2	3.33333	NA
16NF1451_1452	3.66667	3.02	3.66667	1.8
16NF1453	1.26667	2.68	3.16667	1.1
16NF1455_1456	2.83333	1.76	3.33333	0.88
16NF1457	2.33333	2.62	3.66667	0.98
16NF1471	2.33333	2.4	3	0.66
16NF1477_1478	2.83333	2.38	3.5	0.56
16NF1479	2.66667	2.08	NA	0.92
16NF1481	2.5	3.36	4	1.3
16NF1483_1484	3	2.58	4.33333	3.9
16NF1485_1486	2.5	2.42	3.33333	1.2
16NF1489_1490	3	2.36	3.33333	2.24
16NF149_150	2.5	1.48	3.33333	2.06
16NF1491_1492	1.6	2.2	2.16667	NA
16NF1493_1494	2.16667	1.66	3.16667	2.06
16NF1495_1496	2.33333	1.14	2.33333	2.22
16NF1497_1498	2.33333	1.42	2.83333	1.14
16NF1503_1504	2	2.02	3	2.06
16NF1505_1506	1.83333	2.2	2.66667	2.06
16NF1507_1508	2.16667	1.8	2.5	1.94
16NF1509_1510	2.33333	2.1	2.66667	1.66
16NF1515_1516	4	4.1	3.16667	2.2
16NF1517_1518	4	2.4	5.33333	2.12
16NF1519_1520	4	2.1	5	2.32
16NF1521_1522	3	3.3	3.16667	2.48
16NF1523_1524	4.26667	3.1	4.66667	2.72
16NF1525_1526	3.66667	3.2	4.66667	2.7
16NF1527_1528	2.33333	2	3.66667	1.62
16NF153_154	3.16667	2.58	3.83333	3.44
16NF1531_1532	3.33333	2.4	5.16667	1.9
16NF1533_1534	3	2.3	4.83333	2.02
16NF1535_1536	3.16667	2.64	3.5	1.44
16NF1537_1538	2.83333	2.3	4.16667	1.54
16NF1539_1540	1.83333	2.4	3.33333	2.02
16NF1541_1542	3	2.96	4.66667	2.16
16NF1543_1544	2.43333	2.54	3.66667	1.8
16NF1545_1546	2.5	2.76	4.66667	1.96
16NF1547_1548	2.33333	2.54	4.5	NA
16NF1549_1550	2.16667	2.76	4	2.5
16NF155_156	2.56667	2.3	2.83333	2.26
16NF1551_1552	2.66667	3.16	NA	1.76
16NF1553_1554	2.75	1.9	3.76667	2.8
16NF1555_1556	3	3	4.5	NA
16NF1557_1558	2	3.1	3.33333	1.08
16NF1559_1560	2.16667	2	3.16667	1.06
16NF1561_1562	1.33333	0.52	2.16667	0.42
16NF1563_1564	2.83333	2.04	4.83333	1.6
16NF1567_1568	2.16667	1.08	3.33333	1.54
16NF1569_1570	3.16667	1.24	3.66667	1.96
16NF157_158	2.93333	1.14	3	2.48
16NF1571_1572	2.33333	2.1	3.5	1.86
16NF1575_1576	2.66667	1.9	4.33333	1.66
16NF1583_1584	3.16667	2.34	4.16667	2.46
16NF1585_1586	3.16667	1.76	3.83333	2
16NF1587_1588	3.16667	3.06	4	NA
16NF1589_1590	2.66667	2.2	2.66667	2.08
16NF159_160	3.5	2.08	3.5	2.7
16NF1591_1592	2.16667	2.26	3.66667	1.98
16NF1593_1594	2.5	2.5	3.16667	NA
16NF1597_1598	2.16667	2.64	2	NA
16NF1599_1600	2.5	2.06	3.33333	2.2
16NF1601_1602	2.16667	2.1	3	NA
16NF1603_1604	1.33333	1.3	NA	NA
16NF1605_1606	2	1.2	2.33333	NA
16NF1607_1608	1.66667	1.4	2.33333	NA
16NF1609_1610	2	1.2	2.5	NA
16NF161_162	2.66667	2.14	3.83333	2.38
16NF1611_1612	2.83333	2.06	3	NA
16NF1613_1614	2.66667	1.88	3.5	NA
16NF1615_1616	2.23333	2.2	3.5	NA
16NF1617_1618	1.93333	1.96	2.66667	NA
16NF1619_1620	1.83333	1.44	2.83333	NA
16NF1621_1622	2.33333	1.86	2.66667	NA
16NF1623_1624	1.83333	1.3	3.16667	NA
16NF1625_1626	1.5	1.2	3	NA
16NF1627_1628	1	0.92	1.83333	NA
16NF1629_1630	1	1.1	2.16667	NA
16NF1631_1632	1.66667	1.08	2.83333	NA
16NF1633_1634	1.16667	0.64	2.16667	0.74
16NF1637_1638	1.75	1.3	2	NA
16NF1639_1640	2.25	1.32	3	NA
16NF1641_1642	2.16667	1.9	2.5	NA
16NF1643_1644	1.83333	2.18	2.66667	NA
16NF1645_1646	2.16667	1.18	2.66667	NA
16NF1647_1648	2.33333	2.06	2.5	NA
16NF1649_1650	1.16667	1.04	2	NA
16NF165_166	2.16667	1.04	2.66667	0.86
16NF1651_1652	2.5	1.2	2.66667	NA
16NF1653_1654	3	1.7	3	NA
16NF1655_1656	1.66667	1.34	1.83333	NA
16NF1657_1658	2.5	1.6	3.5	NA
16NF1659_1660	2.33333	2.66	3.5	NA
16NF1661_1662	1.16667	1.1	1.33333	NA
16NF1663_1664	2	1.86	2.66667	NA
16NF1665_1666	2.33333	1.7	3.5	NA
16NF1667_1668	2	1.44	2.33333	NA
16NF167_168	2.66667	1.54	3	2.54
16NF1671_1672	1.5	1.4	2.66667	NA
16NF1673_1674	1.5	1.1	2.16667	NA
16NF1675_1676	1.16667	0.88	2	NA
16NF1677_1678	1.33333	1.44	NA	NA
16NF1679_1680	1.83333	2	3.16667	NA
16NF1681_1682	1.83333	2.74	2.66667	NA
16NF1683_1684	1.33333	2.3	2.5	NA
16NF1685_1686	1.76667	2.9	3	NA
16NF1687_1688	2	2.3	2.5	NA
16NF1689_1690	1.5	2.1	3	NA
16NF169_170	3.83333	1.76	4.5	2.46
16NF1691_1692	1.6	1.92	2	NA
16NF1693_1694	1.83333	2.7	2.5	NA
16NF1695_1696	1.33333	1.56	1.83333	NA
16NF1697_1698	2.33333	3.3	3.33333	NA
16NF1699_1700	2.5	3.1	3	NA
16NF17_18	2.83333	2	3	1.38
16NF1701_1702	2.16667	2.6	2.83333	NA
16NF1703_1704	2.33333	2.3	3.66667	NA
16NF1705_1706	2.83333	3.2	3.66667	NA
16NF1707_1708	2.36667	3.24	3.83333	NA
16NF1709_1710	3	2.24	3	NA
16NF171_172	1.83333	1	2.83333	1.64
16NF1711_1712	2.83333	4.26	3.5	NA
16NF1713_1714	2.5	2.3	4.66667	NA
16NF1717_1718	1.03333	1.94	2.5	NA
16NF1721_1722	3.83333	3.6	2.5	NA
16NF1723_1724	2.83333	3.2	3.83333	NA
16NF1725_1726	2	1.2	2.83333	NA
16NF1729_1730	2.33333	1.1	2.33333	NA
16NF173_174	2.5	1.02	3	1.94
16NF1731_1732	1.6	1.1	2.5	0.74
16NF1733_1734	2.5	2.4	2.83333	NA
16NF1735_1736	2.5	1.9	2.33333	NA
16NF1737_1738	1.33333	2.6	2.6	NA
16NF1739_1740	2.5	2.5	4.16667	NA
16NF1741_1742	3.83333	3.5	4.5	NA
16NF1745_1746	1.76667	2.6	2.33333	NA
16NF1747_1748	2.16667	2.1	2.33333	NA
16NF1749_1750	2.2	2.5	3.5	NA
16NF1751_1752	2.16667	2.2	4	NA
16NF1753_1754	1.25	1.6	2.33333	1.4
16NF1757_1758	2.66667	3.18	3.5	NA
16NF1767_1768	1.83333	1	2.33333	1.8
16NF1769_1770	1.1	0.84	2	1.9
16NF177_178	1.66667	1.02	2.5	1.02
16NF1779_1780	1.5	0.96	2	2.4
16NF1783_1784	1.66667	1.2	2.83333	3.58
16NF1785_1786	1.83333	1.44	3.83333	2.1
16NF1787_1788	2	1.2	3	NA
16NF179_180	2.4	1.18	3.33333	2.1
16NF1801_1802	2.46667	2	3.66667	1.2
16NF181_182	2.16667	1.68	3.16667	2.48
16NF1815_1816	1.6	1.04	2.53333	1.4
16NF1817_1818	2.1	1.04	2.4	2.24
16NF1823_1824	1.16667	1.3	3.33333	2.14
16NF1827_1828	0.5	1.22	2.33333	2.36
16NF183_184	2.33333	1.76	2.5	1.82
16NF1831_1832	1.16667	1.04	1.66667	2.06
16NF185_186	2.33333	1.6	3.33333	2.34
16NF1853_1854	1.16667	1.34	1.93333	1.24
16NF1861_1862	1.33333	1.58	3.16667	2.52
16NF1867_1868	1.1	1.04	2.06667	2.8
16NF1869_1870	1.66667	2.4	2.66667	2.62
16NF187_188	1.83333	1.08	2.33333	0.54
16NF1871_1872	1.33333	1.3	1.33333	2.2
16NF1875_1876	1.3	1.24	2.33333	2.16
16NF1877_1878	1.1	1.6	2.33333	2
16NF1879_1880	1.76667	1.2	2.73333	2.06
16NF1881_1882	1.93333	1.3	2.9	3.18
16NF1883_1884	1	1.08	3.16667	2.9
16NF1885_1886	2	1.2	3.16667	2.54
16NF189_190	2.66667	1.44	2.66667	1.96
16NF19_20	2.66667	2.9	3.83333	2.48
16NF1909_1910	1.66667	1.52	2	2.94
16NF191_192	3	1.94	3.33333	3.3
16NF1917_1918	1.2	1.08	2.06667	2.1
16NF1927_1928	1.33333	1.24	2.2	2.9
16NF1929_1930	1.26667	1.04	2.03333	2.12
16NF193_194	2.5	1.64	4.5	2.48
16NF1941_1942	0.86667	1.1	2.5	3
16NF1945_1946	2.66667	2.16	3.33333	3.6
16NF1949_1950	3	2	4.16667	1.8
16NF195_196	1.5	0.9	2	1.24
16NF1951_1952	2.33333	2.02	3.16667	3.24
16NF1957_1958	1.93333	1.58	3.4	3.3
16NF1967_1968	1.83333	1.2	1.86667	2.68
16NF2001_2002	1.83333	0.96	3.33333	2.34
16NF2009_2010	2	0.58	3.16667	2.8
16NF2023_2024	2.1	1.68	2.66667	2.44
16NF2027_2028	1.83333	1.6	2.2	2.48
16NF2037_2038	0.76667	0.62	2	1.32
16NF2047_2048	1.83333	1.2	2.5	2.7
16NF205_206	2.33333	2.18	3	2.42
16NF2051_2052	1.3	1.3	2.33333	0.94
16NF2061_2062	0.76667	1.44	2.16667	2.14
16NF207_208	2.83333	2.24	3	2.02
16NF209_210	1.66667	1.74	2.33333	2.16
16NF2093_2094	1.16667	1.2	2.33333	2.7
16NF2095_2096	1	1.2	2.26667	2.36
16NF21_22	2.16667	1.88	3.5	2.68
16NF2109_2110	2.16667	1.44	3.33333	1.96
16NF211_212	2.1	2.1	2.83333	2.14
16NF2111_2112	1.66667	1.1	2.5	2.76
16NF2115_2116	2.16667	2.6	4.33333	3.3
16NF2117_2118	1.66667	2.06	3	2.7
16NF2119_2120	1.06667	0.88	2.66667	2.06
16NF2121_2122	1.33333	0.68	2	1.64
16NF2129_2130	1.1	1.22	2.66667	3.44
16NF2131_2132	0.93333	1.2	3.33333	2.44
16NF2133_2134	1.33333	0.8	2.93333	1.02
16NF2135_2136	1.13333	0.86	1.53333	2.1
16NF2139_2140	1.33333	1.08	2.06667	1.9
16NF2141_2142	1.16667	1	1.83333	1.8
16NF2143_2144	1.13333	1.3	2.03333	2.5
16NF2145_2146	1.23333	1.2	2	1.86
16NF2147_2148	1.76667	1.2	2.83333	2.76
16NF2151_2152	1.16667	1.16	2.83333	2.64
16NF2169_2170	1.96667	1.14	2.06667	1.26
16NF2173_2174	1.33333	1.1	2	1.44
16NF2175_2176	1.75	1.1	2.83333	1.68
16NF2185_2186	2.33333	2	4.5	2.56
16NF219_220	3.33333	1.5	3.16667	2.02
16NF2195_2196	2	2.22	3.33333	3.28
16NF2197_2198	1.76667	0.7	2.33333	1.24
16NF221_222	2.73333	1.9	3.3	3.28
16NF2215_2216	1.4	0.54	2.5	2.72
16NF2219_2220	1.3	2.2	2.13333	3.6
16NF2223_2224	2.5	2.3	3.66667	NA
16NF2225_2226	2	1.08	3.33333	NA
16NF223_224	1.3	1.04	2.33333	2.12
16NF2231_2232	2.5	1.74	3.23333	NA
16NF2233_2234	1.83333	1.3	3.4	3.5
16NF2239_2240	1.9	1.1	2.56667	1.4
16NF2243_2244	2.75	1.2	2.66667	1.44
16NF2247_2248	1.25	1.04	2.16667	0.96
16NF225_226	2.33333	1	2.5	2.38
16NF2253_2254	1.83333	1.5	3	1.14
16NF2257_2258	1.7	1.56	3	2.74
16NF2261_2262	2.33333	1.3	2.5	1.3
16NF2267_2268	2.33333	1.6	4	1.14
16NF2269_2270	2.6	1.4	2.5	2.02
16NF227_228	2	0.6	2.43333	2.46
16NF2277_2278	2.16667	1.6	2.33333	1.3
16NF2279_2280	2	1.8	2.5	1.44
16NF2281_2282	1.66667	1.14	3.66667	1.86
16NF2283_2284	3	1.7	4.33333	1.7
16NF2285_2286	2	1.1	3.33333	1.4
16NF2287_2288	2.5	1.64	3.33333	2.96
16NF2289_2290	2.66667	2.06	3	1.96
16NF229_230	2.5	1.88	2.66667	2.1
16NF2291_2292	2.5	2.4	3.83333	1.7
16NF2293_2294	2.5	1.92	4.5	2.06
16NF2295_2296	2.33333	1.2	3	1.9
16NF2299_2300	1.83333	1.2	2.5	0.54
16NF23_24	1	1.38	2.5	1.1
16NF2301_2302	2.5	1.2	3.4	1.5
16NF2305_2306	2.5	1.2	3	1.4
16NF2307_2308	2.16667	2	4.83333	1.9
16NF231_232	1.5	2.16	3.66667	3.02
16NF2313_2314	2.33333	1.14	3.16667	1.18
16NF2315_2316	2.46667	1.14	3.46667	1.46
16NF2317_2318	2.5	1.74	4	1.8
16NF2321_2322	2.66667	2.1	3.66667	NA
16NF2325_2326	2.83333	2.5	3.56667	NA
16NF2329_2330	2.9	3.2	4	NA
16NF233_234	2.36667	1.42	3.33333	2.12
16NF2331_2332	2.66667	2.4	4.5	NA
16NF2333_2334	2.53333	2.1	5.33333	NA
16NF2335_2336	2	1.22	2.16667	NA
16NF2337_2338	2	2.74	2.83333	NA
16NF2339_2340	2.23333	3.22	3.93333	NA
16NF2341_2342	3.83333	3.28	4.56667	NA
16NF2343_2344	1.76667	1.34	2.36667	NA
16NF2347_2348	2.23333	1.96	2.96667	NA
16NF2351_2352	2.76667	1.8	2.6	NA
16NF2353_2354	2.36667	2.24	3.5	NA
16NF2355_2356	2.2	1.92	2.43333	NA
16NF2359_2360	2.33333	1.6	2.4	NA
16NF2361_2362	3.06667	3.4	4.83333	NA
16NF2363_2364	2.16667	2.4	3.83333	NA
16NF2365_2366	2.66667	2.34	3.66667	NA
16NF2367_2368	2	2.16	3	NA
16NF2369_2370	2.76667	1.74	3.5	NA
16NF237_238	1.83333	1.02	2.83333	2.3
16NF2371_2372	2.5	2.16	2.83333	NA
16NF2373_2374	2.46667	2.8	3.16667	NA
16NF2375_2376	2.33333	2.36	2.83333	NA
16NF2377_2378	2.83333	3.04	4.5	0.9
16NF2379_2380	2.33333	2.3	3	NA
16NF2381_2382	2.43333	2	3.33333	NA
16NF2389_2390	1.33333	1.04	1.83333	1.16
16NF239_240	2.16667	0.7	2.66667	2.06
16NF2391_2392	2.33333	2.62	3.66667	NA
16NF2393_2394	2.5	1.78	3.33333	2.84
16NF2395_2396	2.2	2	3.73333	NA
16NF2397_2398	3.66667	2.06	4.66667	NA
16NF2415_2416	2.66667	1.6	3.66667	3.2
16NF2427_2428	2	1.58	3	2.28
16NF2429_2430	1.83333	1.64	2.16667	2.84
16NF243_244	2.16667	1.3	3.66667	2.32
16NF2433_2434	2	1.58	2.16667	0.46
16NF2437_2438	2.35	1.92	2.5	3.06
16NF2445_2446	1.66667	1.92	2.83333	2.22
16NF245_246	2.33333	1.5	2.66667	2.12
16NF2451_2452	1.83333	1.86	2.16667	2.48
16NF2453_2454	1.66667	1.4	2.6	2.24
16NF2457_2458	1.83333	2.1	2.33333	2.2
16NF2461_2462	2.2	1.8	2.33333	NA
16NF2465_2466	2.76667	2.6	3.83333	NA
16NF2469_2470	1	1.24	2.16667	NA
16NF2481_2482	3	2.54	3.66667	3.8
16NF2483_2484	2.5	2.4	3.16667	2.36
16NF2485_2486	2.5	2.5	4	1.46
16NF249_250	2.33333	1.84	4.16667	2.5
16NF25_26	3.66667	2.3	5.33333	2.8
16NF251_252	2.83333	1.4	3	1.48
16NF2513_2514	1.83333	1.08	3.16667	2.16
16NF2523_2524	2.33333	2.2	3.5	3.3
16NF2525_2526	1.93333	1.5	3	2.76
16NF2527_2528	2.33333	2.1	4.16667	2.64
16NF2531_2532	1.33333	1.5	2.66667	1.46
16NF2537_2538	2	0.9	2.43333	3.4
16NF2545_2546	1.66667	1.12	2.83333	2.6
16NF2547_2548	1.4	1.1	3.16667	1.74
16NF255_256	2.66667	1.94	3.16667	3.04
16NF2551_2552	1.4	1.1	2.33333	2.5
16NF2553_2554	1.83333	0.96	3.16667	2
16NF257_258	3.33333	1.78	3.66667	2.34
16NF2573_2574	1.6	1.08	1.76667	1.4
16NF2593_2594	1.1	0.92	1.83333	1.66
16NF2597_2598	3.33333	2.06	3.66667	2.3
16NF2599_2600	3	3.04	3.16667	2.3
16NF2601_2602	2.16667	1.08	3.83333	1.4
16NF2607_2608	1.66667	1.18	2.33333	1.2
16NF261_262	2.33333	2.12	2.33333	1.44
16NF2629_2630	2	2	2.16667	2.32
16NF263_264	2.3	1.32	3.06667	1.68
16NF2653_2654	1.33333	1.22	2.83333	2.16
16NF2659_2660	0.5	0.86	1.5	0.94
16NF2663_2664	1.33333	1.12	2.5	0.92
16NF2665_2666	1.33333	1.24	1.33333	2.3
16NF2667_2668	1.66667	1.24	3	3.04
16NF267_268	2.5	1.32	3	1.9
16NF2681_2682	2.16667	1.14	3.83333	2.3
16NF2687_2688	1.5	0.96	2.33333	1.58
16NF2695_2696	2.66667	2.16	3.83333	3.68
16NF2699_2700	2.5	1.5	3.66667	1.5
16NF27_28	2.33333	2	3.33333	2.1
16NF271_272	2.5	2.04	3.73333	3.2
16NF2719_2720	2.33333	2.02	3	4.74
16NF273_274	2.83333	1.6	3.9	2.9
16NF2743_2744	1.83333	1.2	2	NA
16NF2747_2748	2.5	1.2	3.5	3.1
16NF275_276	1.5	2.2	3	2.32
16NF2755_2756	2	1.28	3.16667	2.92
16NF2763_2764	1.83333	1.44	2.83333	2.16
16NF2765_2766	1.5	1.66	2.33333	3
16NF2767_2768	1.66667	1.68	2.66667	2.1
16NF2769_2770	1.5	1.48	1.66667	1.9
16NF277_278	1.66667	1.46	3.16667	1.88
16NF2771_2772	2	1.2	2.66667	1.94
16NF2773_2774	1.6	1.56	3.16667	1.66
16NF2775_2776	2.06667	1.68	3.06667	1.86
16NF2777_2778	1.83333	1.48	2.6	1.98
16NF2781_2782	1.73333	1.8	3.33333	1.72
16NF2783_2784	1.86667	1.58	2.66667	1.78
16NF2787_2788	1	0.96	1.16667	1.9
16NF2791_2792	1.33333	1.1	2.33333	2.14
16NF2793_2794	1.66667	0.96	2.9	1.98
16NF2797_2798	2	2.08	3.33333	NA
16NF2801_2802	2	1.72	3.33333	NA
16NF2805_2806	1.66667	2	3.33333	3.24
16NF2807_2808	1.4	1.62	1.93333	2.16
16NF281_282	2.5	1.26	2.66667	1.82
16NF2811_2812	1.93333	1.56	2.93333	3.24
16NF283_284	2.56667	1.86	3.33333	2.58
16NF2837_2838	1.63333	1.3	2.43333	1.8
16NF285_286	1.33333	0.56	2	2.2
16NF2851_2852	1.5	1.34	1.83333	2.64
16NF2853_2854	1.83333	2.02	2.5	1.42
16NF2859_2860	1.9	2.46	2.33333	2.06
16NF2861_2862	1.06667	1.24	1.6	2.1
16NF2863_2864	0.5	1.08	1.33333	1.12
16NF2869_2870	1.9	1.84	3.63333	2.3
16NF287_288	1.5	1.18	1.83333	2.06
16NF2875_2876	3.66667	0.84	4.33333	1.36
16NF2879_2880	1.53333	1.46	2	2.36
16NF2881_2882	1.5	1.46	2.16667	2.94
16NF2883_2884	1.5	2.64	2.66667	3.28
16NF2889_2890	1.16667	1.44	1.76667	2.14
16NF289_290	2.66667	1.74	2.83333	NA
16NF2897_2898	1.23333	1.52	1.66667	1.56
16NF2899_2900	2.83333	2.44	3.33333	2.64
16NF29_30	2.33333	1.8	NA	2.16
16NF2905_2906	2	0.96	1.73333	1.4
16NF2907_2908	2.5	2.32	3.66667	4.6
16NF2909_2910	2.16667	2.6	3.16667	1.76
16NF291_292	2.33333	1	2.83333	1.82
16NF2925_2926	2	2.5	3.66667	NA
16NF2929_2930	1.73333	1.76	2.66667	2.54
16NF293_294	2.33333	1.12	3.33333	2.12
16NF295_296	2	1.9	2.33333	2.88
16NF2959_2960	1.66667	1.62	2.66667	1.08
16NF2969_2970	2.83333	1.98	4.33333	4.24
16NF297_298	1.03333	1.48	2	2.18
16NF2981_2982	2.16667	1.34	2.83333	1.54
16NF2983_2984	1.66667	1.4	3.66667	1.9
16NF2985_2986	2.5	2.82	4	NA
16NF2989_2990	2.5	2.58	3.66667	NA
16NF299_300	3	1.92	4.16667	2.28
16NF2993_2994	1.83333	1.78	2.16667	NA
16NF2997_2998	1.33333	1.44	2.06667	1.76
16NF301_302	1.66667	1.22	3.83333	2.3
16NF3013_3014	3.16667	3.06	5	5.24
16NF3021_3022	1.83333	2.16	2.33333	2.448
16NF3027_3028	3.16667	2.9	4.5	3.3
16NF303_304	1.83333	1.48	2.66667	2.14
16NF3035_3036	2	1.4	2.5	2.8
16NF3047_3048	1.86667	1.66	3	2.3
16NF3049_3050	2	1.24	2.66667	2.9
16NF305_306	2.33333	0.58	3.16667	1.84
16NF3055_3056	2.33333	1.58	3.5	2.36
16NF3061_3062	1.5	1.44	2.5	3.1
16NF307_308	3.66667	1.36	4.83333	2.3
16NF3075_3076	3.83333	2.98	5	2.04
16NF3087_3088	2.5	1.82	3.33333	1.64
16NF309_310	3.16667	2.7	4	3.4
16NF3091_3092	2.5	3.74	4	1.76
16NF3099_3100	2.83333	3.5	3	4.82
16NF31_32	1.5	1.66	3	1.9
16NF311_312	2.83333	1.22	3.66667	2.06
16NF3111_3112	2.66667	1.9	3.33333	1
16NF3121_3122	3	2.74	3.66667	2.1
16NF3123_3124	1.93333	2.34	2.33333	1.74
16NF3127_3128	2	1.12	2.83333	2.1
16NF313_314	2.33333	1	2.66667	2.44
16NF3169_3170	3.5	3.2	4.66667	4.5
16NF317_318	2.66667	2.08	3.66667	3.28
16NF3177_3178	1.5	0.6	2.33333	0.46
16NF3181_3182	2.83333	2.54	4.16667	2.36
16NF319_320	1.66667	1.52	2.16667	1.8
16NF3203_3204	2.73333	1.44	3.26667	0.62
16NF3205_3206	1.93333	0.62	2.93333	1.4
16NF321_322	3.33333	2.06	3.83333	3.42
16NF3211_3212	1.76667	0.96	3	2.24
16NF3213_3214	2.9	1.46	3.56667	3.2
16NF3219_3220	2.26667	1.4	2.9	NA
16NF3227_3228	2.76667	2.7	4.06667	1.6
16NF3229_3230	2.56667	0.96	2.5	2.32
16NF323_324	1.83333	1.92	2	NA
16NF3231_3232	2.33333	1.24	3.66667	4.34
16NF325_326	2.66667	1.34	4	2.6
16NF3251_3252	2	1.44	3.5	1.76
16NF3253_3254	2.26667	1.62	4	4.24
16NF3255_3256	1.66667	1.3	2	2.88
16NF3259_3260	2.83333	2.52	4	NA
16NF3261_3262	2.33333	2.3	2.66667	2.32
16NF327_328	2.33333	1.18	3.16667	1.56
16NF3275_3276	2.16667	2.1	3.33333	2.06
16NF3279_3280	2.5	2.8	3.66667	2.26
16NF3283_3284	2.5	2.6	3.8	3.74
16NF329_330	2.16667	1.9	2.66667	2.76
16NF3297_3298	2	0.84	3.23333	2.6
16NF3299_3300	2.4	1.26	3.06667	2.94
16NF33_34	2.83333	1.98	3.66667	2.44
16NF3301_3302	3.66667	1.8	5.33333	3.88
16NF3311_3312	2	0.82	2.33333	1.52
16NF3313_3314	3	1.8	4.16667	4.64
16NF3315_3316	2.16667	1.2	2.83333	1.9
16NF3321_3322	2	1.2	2	1.3
16NF333_334	3.33333	2.16	5.33333	3.26
16NF3333_3334	2.9	2.44	4.9	5.14
16NF3341_3342	1.83333	1.94	2.56667	1.12
16NF3347_3348	3	2.3	3.23333	3.2
16NF335_336	2.83333	1.66	3.83333	2.1
16NF3355_3356	2.66667	2.1	3.56667	3.8
16NF3363_3364	2	1.52	3	2.54
16NF3365_3366	2	0.5	2.83333	1.64
16NF337_338	1.9	1.4	3	1.5
16NF3393_3394	2.16667	1.3	2.5	2.4
16NF3399_3400	1.83333	1.26	2.66667	3.1
16NF3405_3406	2.16667	1.34	3	2.7
16NF341_342	1.33333	0.82	2.5	1.96
16NF3417_3418	1.66667	1.1	2.5	2.1
16NF3423_3424	2.16667	1.84	3.83333	2.52
16NF343_344	2.16667	1.5	2.66667	2.12
16NF3441_3442	2.33333	1.38	4.5	4.94
16NF3449_3450	3.83333	3.7	4	3.2
16NF345_346	2.33333	1.46	3.66667	2.2
16NF3451_3452	3	4	NA	2.6
16NF3455_3456	2.5	2.24	3.5	1.2
16NF3459_3460	2.5	2.06	3.66667	1.84
16NF3465_3466	2.16667	2.14	3.66667	2.6
16NF3467_3468	2.16667	1.08	3.16667	1.42
16NF347_348	2	1.28	2	2.02
16NF3477_3478	3.16667	2.1	3.16667	1.72
16NF3483_3484	1.66667	0.84	2.33333	1.24
16NF3489_3490	3	3.6	4	2.46
16NF349_350	2.06667	2.54	3.66667	3.14
16NF3491_3492	2.16667	1.5	3.33333	1.38
16NF3493_3494	2	1.1	2.66667	2.84
16NF3495_3496	2.66667	1.86	3.83333	NA
16NF3497_3498	2.16667	1.34	2.33333	1
16NF35_36	2	1.66	2.83333	1.66
16NF3503_3504	2.83333	1.08	5	2.68
16NF3505_3506	2.25	0.92	3.16667	1.04
16NF3509_3510	2.83333	1.7	3.5	NA
16NF351_352	2.16667	1.88	3.66667	3.04
16NF3511_3512	2.5	1.98	3.16667	NA
16NF3517_3518	2.16667	1.38	3.16667	NA
16NF3519_3520	2.83333	2	3	1.36
16NF3523_3524	2	1.92	2.5	NA
16NF353_354	1.33333	0.74	2	1.6
16NF3537_3538	1.83333	1.44	3.16667	1.9
16NF355_356	2	1.8	3	2.4
16NF3555_3556	4.33333	2.96	5.16667	3.6
16NF3563_3564	3	3.1	3.66667	2.5
16NF357_358	2.16667	1.6	2.83333	NA
16NF3573_3574	1.83333	2.6	3.16667	3.7
16NF3585_3586	2.83333	2.7	4.16667	5.5
16NF3587_3588	1.83333	2.2	2.33333	1.62
16NF3589_3590	2.5	2	4.33333	1.38
16NF359_360	1.83333	1.2	4	2.2
16NF3591_3592	3.33333	2.24	3.16667	3.1
16NF361_362	2.83333	1.2	2.83333	2.4
16NF3613_3614	2.66667	1.58	3.5	1.6
16NF3617_3618	2.5	1.3	3	3.68
16NF3621_3622	2.66667	1.24	3.33333	3.24
16NF3623_3624	2	1.4	3	2.22
16NF3629_3630	2.66667	1.7	4.16667	3.5
16NF363_364	2	1.44	2.16667	2.3
16NF3631_3632	2.5	1.3	3	2.84
16NF3635_3636	2.5	1.64	4.33333	2.7
16NF3639_3640	3.75	2.64	3.5	3.96
16NF3651_3652	2.83333	1.5	2.66667	2.42
16NF3667_3668	2.5	2.6	4.66667	3.94
16NF3669_3670	2	2.2	3.33333	2.94
16NF3671_3672	2.83333	2.6	4.66667	5.4
16NF3673_3674	2.16667	0.88	3.33333	2.17
16NF3675_3676	1.83333	2	3	2.38
16NF3689_3690	2.66667	2	3.83333	5.7
16NF3695_3696	3.5	2.4	4.33333	3.8
16NF3697_3698	4	2.86	3.5	5.2
16NF37_38	1.66667	1.4	2.16667	1.3
16NF3703_3704	3.16667	3.3	4.33333	3.1
16NF3705_3706	2.5	2.1	3.33333	1.2
16NF3709_3710	NA	1.34	2.16667	2.34
16NF371_372	3.5	3.06	5.5	2.84
16NF3717_3718	1.5	1.16	2.5	3.2
16NF3729_3730	2	1.34	2.83333	2.32
16NF3733_3734	1.75	1.4	2.5	2.26
16NF3737_3738	3.5	1.66	3.66667	3.2
16NF3741_3742	1	1.2	3.33333	1.64
16NF3743_3744	NA	1.1	2.16667	2.7
16NF3745_3746	1.83333	1.24	2.5	1.7
16NF3749_3750	2	2.62	3.33333	4.8
16NF3755_3756	NA	3	2.5	5.5
16NF3757_3758	2.16667	2.3	3.16667	1.46
16NF377_378	1.83333	1.68	4	2.38
16NF379_380	2.66667	2.46	3.83333	2.22
16NF3791_3792	2	1.3	2.66667	2.32
16NF3803_3804	1.83333	2.1	2.33333	4.7
16NF3805_3806	2.5	2.02	2.66667	4.08
16NF3809_3810	2.5	2.04	3.16667	1.7
16NF3821_3822	2.26667	1.64	3.66667	3.38
16NF3825_3826	2.5	1.68	3.16667	1.1
16NF3827_3828	2.5	2.04	2.83333	3.2
16NF3829_3830	2.16667	1.9	3	3.2
16NF3833_3834	1.1	1.2	2.16667	2.9
16NF3835_3836	1.66667	2	2.16667	2.2
16NF3837_3838	1.83333	2.24	3.16667	4
16NF3851_3852	2.83333	2.04	4.33333	1.16
16NF3853_3854	1.25	0.84	1.66667	1.98
16NF3855_3856	2.66667	1.52	3.33333	3.5
16NF3857_3858	NA	1.9	3.33333	1.62
16NF387_388	2.33333	1.36	2.66667	1.24
16NF389_390	1.5	1.82	2.5	2.66
16NF3891_3892	1.5	1.08	1.66667	2.58
16NF3893_3894	1.25	1.04	2.83333	0.54
16NF3899_3900	1.5	2.1	1.83333	1.5
16NF39_40	3.5	2	3.5	2.76
16NF3901_3902	2.16667	1.3	3	1.22
16NF3909_3910	2.16667	1.6	2.83333	2.9
16NF391_392	1.66667	1.14	2.5	1.48
16NF3911_3912	2.16667	3.1	3.16667	3.84
16NF3913_3914	2.5	2	2.83333	3.94
16NF3915_3916	2.5	2.3	2.83333	3.08
16NF3917_3918	3.33333	2.3	2.66667	1.08
16NF3921_3922	1.5	1.6	2.66667	0.74
16NF3925_3926	1	1.16	2.16667	0.392
16NF3927_3928	NA	1.34	4.5	0.54
16NF3929_3930	1.83333	1.9	2.5	0.54
16NF393_394	1.83333	2.62	3.16667	1.7
16NF3931_3932	1.66667	1.6	2.66667	0.96
16NF3941_3942	1	2	2.33333	3.06
16NF395_396	1.83333	1.44	4.16667	1.76
16NF3955_3956	1.5	1.54	2	1
16NF3957_3958	1.5	1	2.16667	1.04
16NF3959_3960	1.75	0.6	2.5	1.1
16NF3969_3970	0.5	0.5	1	0.42
16NF397_398	2.5	1.24	2.66667	1.88
16NF3971_3972	1	0.62	1.83333	1.04
16NF3983_3984	NA	1.3	2.5	2.74
16NF3987_3988	2.5	1.3	3.16667	2.8
16NF399_400	2.33333	0.84	2.83333	1.3
16NF3993_3994	0.5	0.54	1.33333	1.18
16NF4003_4004	NA	1.3	3.33333	2.68
16NF4007_4008	2.53333	1.14	2.66667	2.94
16NF401_402	1.5	1.16	2.83333	1.6
16NF4019_4020	3.16667	2.44	3.66667	4.9
16NF4023_4024	1.5	1	2.33333	3.2
16NF4025_4026	3	1.84	3	6.1
16NF4027_4028	1.83333	1.2	2.5	1.04
16NF403_404	2.5	1.42	3	1.44
16NF4033_4034	3	2.1	4	5
16NF4049_4050	NA	2.16	3.16667	5.8
16NF4051_4052	1.5	1.08	1.66667	2.2
16NF4067_4068	NA	2.3	3.83333	2.42
16NF4069_4070	3.5	2.5	4.5	5.6
16NF407_408	2.16667	1.6	3	1.86
16NF4071_4072	2.16667	2.3	2.66667	1.5
16NF4079_4080	2.33333	2.2	3.16667	3.34
16NF4081_4082	1.75	2	2.5	2.16
16NF4095_4096	2.5	2.3	3.33333	2.3
16NF4099_4100	2.16667	1.44	2.66667	2.5
16NF41_42	3.33333	2.7	3.66667	3.12
16NF4107_4108	2.66667	2.1	3.5	3.8
16NF4109_4110	3.33333	2.82	4	2.5
16NF411_412	2.33333	0.96	3.33333	2.3
16NF4119_4120	1.16667	1.2	NA	1.12
16NF4127_4128	1.16667	0.56	1	1.28
16NF413_414	2.5	2.12	3	1.84
16NF4139_4140	2.5	2.2	2.16667	1.3
16NF4141_4142	1.16667	0.62	2.16667	0.46
16NF4143_4144	2.33333	1.6	2.83333	2.98
16NF4145_4146	2.33333	1.2	3.16667	3.1
16NF4147_4148	1.5	2.26	3.66667	2.8
16NF4149_4150	2.33333	1.54	3.5	2.84
16NF415_416	1.66667	1.42	3.66667	1.18
16NF4153_4154	1.33333	0.96	2.16667	1.48
16NF4155_4156	2	1.16	2.33333	3.1
16NF4157_4158	2.16667	1.3	3.5	2.4
16NF4165_4166	NA	0.24	1.16667	0.24
16NF417_418	1.66667	0.92	2.5	1.26
16NF4171_4172	2.33333	4.14	2.66667	3.2
16NF4173_4174	3.33333	2.24	3.33333	3.5
16NF4175_4176	NA	1.68	3.66667	2.3
16NF4179_4180	1.66667	2.26	3.5	2.1
16NF4181_4182	2.16667	2.12	3	3.1
16NF419_420	2.33333	1.02	3	1.8
16NF4191_4192	2.33333	2.06	4.5	3.04
16NF4197_4198	1.25	0.78	2.83333	0.62
16NF4209_4210	2.5	2.16	3.33333	3.38
16NF421_422	1.83333	1.8	2.33333	2.18
16NF4225_4226	3	2.38	4.66667	4.04
16NF4227_4228	1.66667	1.3	2.5	2.14
16NF423_424	2.16667	1.04	3.83333	1.98
16NF4233_4234	2.16667	2.16	NA	NA
16NF4235_4236	2.16667	1.2	3.16667	2.1
16NF4241_4242	2.5	1.34	3.33333	2.9
16NF425_426	2.16667	0.88	2.83333	1.86
16NF4253_4254	2.33333	2.14	3	1.96
16NF4259_4260	1.66667	0.88	2.33333	1.1
16NF4261_4262	0.2	0.18	0.8	0.46
16NF4267_4268	1.33333	1.22	1.66667	1.1
16NF427_428	2.66667	1.68	3.83333	1.8
16NF4277_4278	3	2.02	3.25	4.06
16NF4279_4280	4.66667	2.58	5.25	5.52
16NF4285_4286	3.5	2.1	4.25	6.78
16NF4287_4288	2.83333	1.96	3.75	2.94
16NF4293_4294	3.5	2.42	4.25	3.44
16NF4295_4296	2.66667	1	3.5	1.08
16NF4297_4298	3.33333	1.4	3.5	NA
16NF4299_4300	1.5	0.94	2.25	NA
16NF4301_4302	2.33333	2.86	3.75	1.86
16NF4303_4304	3.5	2.9	3.75	1.2
16NF4305_4306	2.66667	2.7	4	1.36
16NF431_432	2.5	1.64	3.33333	1.14
16NF433_434	1.83333	0.82	2.5	1.8
16NF437_438	1.66667	1.16	3	2.5
16NF439_440	2.16667	1.4	3.33333	1.8
16NF4404	2.66667	2.24	2.5	NA
16NF4405	2	1.06	2.5	2.92
16NF4412	3.16667	2.2	4.66667	5.14
16NF4414	2.33333	2.3	3.25	4.22
16NF4419	1.5	2.88	2.83333	3.7
16NF4420	1.43333	2.2	2.43333	3.04
16NF4421	1.83333	2.2	2.83333	2.02
16NF4422	1.73333	1.3	NA	2.5
16NF4423	1.83333	1.24	3.33333	2.2
16NF4426	1.5	1.16	3.5	2.56
16NF4440	2	1.4	3	3.1
16NF4441	2.16667	1.8	2.83333	NA
16NF4447	1.1	1.44	2.93333	3.64
16NF4449	1.33333	1.64	2.16667	2.24
16NF4452	1	2.24	1.66667	1.76
16NF4453	2	1.08	3	2.7
16NF4454	2.83333	2.22	3	3.8
16NF4457	2.33333	1.82	2.5	2.54
16NF4458	2.26667	1.68	2.83333	NA
16NF4467	3.16667	2.32	3.66667	2.96
16NF4472	1.86667	2.4	3.16667	2.14
16NF4477	1.5	0.84	2	1.54
16NF4480	1.16667	0.92	2.33333	2.38
16NF4483	2.5	2.08	2.16667	NA
16NF4484	2.5	2.02	2.33333	3.84
16NF4485	2.26667	1.5	2	2.14
16NF4488	3.13333	2.2	4.16667	3
16NF4489	2.5	2.2	2.83333	3.6
16NF4490	2	1.54	3.5	NA
16NF4491	2.16667	1.44	3	2.06
16NF4494	2.33333	1.64	NA	NA
16NF4497	2.5	1.92	NA	NA
16NF4499	2.66667	3.1	NA	NA
16NF45_46	2	1.5	2.5	1.4
16NF4500	2.33333	1.88	3.33333	NA
16NF4506	2.33333	1.14	3	NA
16NF4515	2.66667	1.86	4.16667	NA
16NF4526	2.83333	2.68	3.5	NA
16NF4529	2	2.1	3.16667	3.22
16NF4532	2.5	2.18	4.33333	3.2
16NF4533	1.83333	2.1	3.06667	2.66
16NF4540	1.66667	2.46	3.66667	2.84
16NF4545	0.5	1.06	2.16667	2.98
16NF4546	1.33333	1.18	2.33333	1.48
16NF455_456	2.5	1.68	2.66667	2.54
16NF4556	0.93333	1.06	2	1.88
16NF4559	3.25	1.54	4.16667	2.94
16NF4572	3.33333	3.1	4.4	NA
16NF4574	2.5	1.72	NA	2.08
16NF4578	1.83333	2.42	2.5	NA
16NF4580	2.16667	2.1	4.5	2.48
16NF4581	2	1.4	3.26667	1.1
16NF4582	2.33333	1.34	2.83333	0.78
16NF4585	2	1.18	3.33333	0.72
16NF4588	2.83333	2.34	3	1.62
16NF4591	2.33333	1.66	2.83333	1.06
16NF4595	1.5	0.88	NA	0.48
16NF4599	2.66667	2.7	2.66667	1.26
16NF4600	2.13333	1.34	3.25	1.48
16NF4601	2.5	1.04	3.33333	0.92
16NF4603	2.33333	1.06	2.83333	1
16NF4605	2.66667	1.92	NA	1.8
16NF4624_4625	2.5	2.3	3	NA
16NF4628_4629	2.5	2.56	NA	NA
16NF4630_4631	2.66667	1.96	3.83333	3.14
16NF4648_4649	1.5	1.12	2.33333	2.66
16NF465_466	2.16667	1.02	2.66667	2.4
16NF4664_4665	3	3.38	4.16667	NA
16NF4668_4669	2.5	1.74	3	NA
16NF4698	3	1.5	3.83333	2.7
16NF47_48	2.33333	2.2	2.83333	1.54
16NF4708	2.5	1.24	3	1.4
16NF4711	3	1	3.36667	NA
16NF4712	2.66667	1.12	3	NA
16NF4714	2.5	1.34	2.9	1.5
16NF4715	1.33333	1.24	2.16667	NA
16NF4716	1.3	1.18	3	0.96
16NF4718	1.66667	1.08	2.16667	0.62
16NF4725	1.83333	3.44	2.66667	1.62
16NF4726	1.66667	1.2	NA	1.78
16NF4728	2	1.9	NA	NA
16NF473_474	2.66667	1.4	3	2.24
16NF4730	2.33333	2.44	2.33333	1.6
16NF4731	2.5	2.72	2.83333	2.52
16NF4734	1.83333	1.78	2.66667	2.08
16NF4735	2	1.54	3	2.04
16NF4736	1.83333	1.7	2.33333	1.7
16NF4737	2.5	2.16	3	2.04
16NF4739	2.16667	1.68	3.33333	NA
16NF4740	2	1.18	2.5	NA
16NF4741	2	1.46	2.83333	1.64
16NF4742	2	1.42	2.33333	2.5
16NF4744	2.33333	1.42	4.33333	NA
16NF475_476	1.83333	1.08	2.5	1.38
16NF479_480	1.75	1.12	2.16667	1.5
16NF481_482	3.5	1.44	2	1.46
16NF483_484	1.83333	1.78	3.5	2.36
16NF487_488	2.16667	1.42	3.33333	1.76
16NF489_490	2.83333	1.7	3.66667	2.02
16NF49_50	2.66667	1.28	3.5	1.66
16NF493_494	2.16667	1.34	3	1.12
16NF495_496	2.66667	1.88	3.83333	2.06
16NF497_498	3.5	1.54	4	2.08
16NF499_500	3	2.38	4.5	2.5
16NF5_6	2.66667	2.12	3.5	1
16NF503_504	1.66667	1.04	2.33333	1.04
16NF505_506	2.66667	2.32	3	3.96
16NF509_510	1.83333	1.28	2.83333	1.58
16NF511_512	1.83333	1.46	2.33333	2.22
16NF517_518	1.66667	0.56	2.83333	1.3
16NF521_522	2.43333	1.38	4	2.2
16NF523_524	2.66667	2.32	5.16667	3.1
16NF525_526	4	1.12	3.5	2.3
16NF527_528	2.16667	1.28	2.83333	1.7
16NF529_530	2.66667	2.04	4	2.1
16NF53_54	2.16667	1.5	2.33333	1.68
16NF535	2.83333	1.9	4.33333	NA
16NF55_56	1.75	1.42	2.66667	1.44
16NF565_566	NA	1.8	3.83333	2.26
16NF57_58	1.66667	1.24	3	1.9
16NF573_574	2.33333	0.7	3	2.1
16NF581_582	2.16667	2.12	3	1.58
16NF61_62	2	1.6	3.16667	1.48
16NF615_616	2.5	0.92	3.16667	1.7
16NF619_620	2.33333	1.5	3.66667	NA
16NF621_622	2.16667	1.88	3.66667	NA
16NF623_624	2.66667	1.76	3.75	NA
16NF625_626	2.83333	2.12	3.75	1.86
16NF627_628	2.33333	1.68	4	NA
16NF63_64	2.33333	1.24	4	1.54
16NF645_646	1.83333	1.72	2	NA
16NF65_66	2.33333	1.7	3.33333	1.08
16NF67_68	2.66667	2.34	3.83333	3.4
16NF684_685	1.83333	1.66	3.33333	NA
16NF688_689	NA	0.72	3.16667	NA
16NF69_70	1.33333	1.3	2.33333	1.94
16NF7_8	2.33333	1.36	4.5	0.84
16NF73_74	2	1.24	2.5	1.44
16NF75_76	2.16667	1.46	3.16667	2.16
16NF79_80	2.5	2.04	3.33333	1.82
16NF81_82	2.33333	1.32	3.33333	1.44
16NF83_84	2	1.66	2	1.9
16NF85_86	2.33333	2.18	2.5	3.5
16NF87_88	2.66667	1.22	3	3.26
16NF89_90	2.5	2.06	3.5	3
16NF93_94	2.66667	2.2	3.83333	2.9
16NF95_96	2.56667	2.66	3.16667	2.64
16NF97_98	2.5	2.1	2.83333	2.52
16NF99_100	2.66667	1.48	3	2.38
HF37	3.33333	2.34	3.66667	NA
LYH74	2.1	1.44	2.5	3.06
LYH85	2.5	2.12	4	3.24
QLJ146	2.75	1.5	3.5	NA
QLJ148	2.66667	2.12	2.83333	NA
QLJ159	2.66667	1.74	3.33333	1.9
QLJ57	3.5	2.4	4.9	NA
QLJ7	2.33333	1.54	2.33333	NA
QLJ96	3	2.68	3.66667	NA
Suinong14	2.5	2.98	2.83333	NA
TSZY64	2.33333	2.9	3.16667	NA
Z118	1.06667	1.92	2.83333	2.4
Z128	1.6	1.96	2	2.88
Z131	1.23333	1.9	2.66667	2.42
Z156	2	2.68	3.16667	3.3
Z184	1.83333	1.2	2.66667	0.88
Z188	2.26667	2.06	3.66667	NA
Z29	2.53333	1.44	3.73333	1.72
Z36	1.26667	2.9	2.66667	1.96
Z39	1.66667	2.3	2.33333	1.4
Z40	2	2.94	2.83333	2.24
Z43	1.5	1.64	1.66667	2.06
Z44	2	2.64	2.66667	2.6
Z47	1.66667	2.7	2.06667	1.82
Z51	2.06667	1.44	3.5	3.54
Z78	NA	1.84	3	2.3
Z95	1.66667	1.58	2.5	2.76

## Sheet: Table S4
Table S4 Peak SNPs and beneficial alleles of EL identified by GWAS
NO.	Chr.	Physical position (bp)	Gene model	Trait	R2（contribution rate）	LOD	Pvalue	AT homologous	Functional annotation
1	1	6119951	Glyma.01G050100	ELS_Q	0.5091	13.3711	4.25997e-14	AT1G69530.1	expansin A1
2	1	6119951	Glyma.01G050200	ELS_Q	0.5091	13.3711	4.25997e-14	AT3G56050.1	Protein kinase family protein
3	1	6119951	Glyma.01G050300	ELS_Q	0.5091	13.3711	4.25997e-14
4	1	6119951	Glyma.01G050400	ELS_Q	0.5091	13.3711	4.25997e-14	AT1G14180.1	RING/U-box superfamily protein
5	1	6119951	Glyma.01G050500	ELS_Q	0.5091	13.3711	4.25997e-14	AT5G64130.1	cAMP-regulated phosphoprotein 19-related protein
6	1	6119951	Glyma.01G050600	ELS_Q	0.5091	13.3711	4.25997e-14	AT5G18410.1	transcription activators
7	1	6119951	Glyma.01G050700	ELS_Q	0.5091	13.3711	4.25997e-14	AT5G15290.1	Uncharacterised protein family (UPF0497)
8	1	6119951	Glyma.01G050800	ELS_Q	0.5091	13.3711	4.25997e-14	AT1G14160.1	Uncharacterised protein family (UPF0497)
9	1	6119951	Glyma.01G050900	ELS_Q	0.5091	13.3711	4.25997e-14	AT1G14150.1	PsbQ-like 2
10	1	6119951	Glyma.01G051000	ELS_Q	0.5091	13.3711	4.25997e-14	AT2G04660.1	anaphase-promoting complex/cyclosome 2
11	1	6119951	Glyma.01G051100	ELS_Q	0.5091	13.3711	4.25997e-14	AT3G61440.2	cysteine synthase C1
12	1	6119951	Glyma.01G051200	ELS_Q	0.5091	13.3711	4.25997e-14	AT1G18720.1	Protein of unknown function (DUF962)
13	1	6119951	Glyma.01G051300	ELS_Q	0.5091	13.3711	4.25997e-14	AT1G69490.1	NAC-like, activated by AP3/PI
14	1	6119951	Glyma.01G051400	ELS_Q	0.5091	13.3711	4.25997e-14	AT2G03150.1	ATP/GTP-binding protein family
15	1	6119951	Glyma.01G051500	ELS_Q	0.5091	13.3711	4.25997e-14
16	1	6119951	Glyma.01G051600	ELS_Q	0.5091	13.3711	4.25997e-14	AT5G15310.1	myb domain protein 16
17	1	6119951	Glyma.01G051700	ELS_Q	0.5091	13.3711	4.25997e-14	AT3G01140.1	myb domain protein 106
18	1	6119951	Glyma.01G051800	ELS_Q	0.5091	13.3711	4.25997e-14	AT1G42970.1	glyceraldehyde-3-phosphate dehydrogenase B subunit
19	1	6119951	Glyma.01G051900	ELS_Q	0.5091	13.3711	4.25997e-14
20	1	6119951	Glyma.01G052000	ELS_Q	0.5091	13.3711	4.25997e-14	AT5G05800.1
21	1	6119951	Glyma.01G052100	ELS_Q	0.5091	13.3711	4.25997e-14	AT5G35695.1
22	1	6119951	Glyma.01G052200	ELS_Q	0.5091	13.3711	4.25997e-14	AT1G26750.1
23	1	6119951	Glyma.01G052300	ELS_Q	0.5091	13.3711	4.25997e-14	AT1G26761.1	Arabinanase/levansucrase/invertase
24	1	7436739	Glyma.01G055700	ELT_Q	0.3694	6.3602	4.36571e-07	AT1G15460.1	HCO3- transporter family
25	1	7436739	Glyma.01G055800	ELT_Q	0.3694	6.3602	4.36571e-07	AT5G49580.1	Chaperone DnaJ-domain superfamily protein
26	1	7436739	Glyma.01G055900	ELT_Q	0.3694	6.3602	4.36571e-07	AT1G69330.1	RING/U-box superfamily protein
27	1	7436739	Glyma.01G056000	ELT_Q	0.3694	6.3602	4.36571e-07	AT1G13920.1	Remorin family protein
28	1	7436739	Glyma.01G056100	ELT_Q	0.3694	6.3602	4.36571e-07	AT1G17020.1	senescence-related gene 1
29	1	7436739	Glyma.01G056200	ELT_Q	0.3694	6.3602	4.36571e-07	AT2G20540.1	mitochondrial editing factor 21
30	1	7436739	Glyma.01G056300	ELT_Q	0.3694	6.3602	4.36571e-07	AT5G61240.1	Leucine-rich repeat (LRR) family protein
31	1	7436739	Glyma.01G056400	ELT_Q	0.3694	6.3602	4.36571e-07	AT1G26600.1	CLAVATA3/ESR-RELATED 9
32	1	7436739	Glyma.01G056500	ELT_Q	0.3694	6.3602	4.36571e-07	AT1G13890.1	soluble N-ethylmaleimide-sensitive factor adaptor protein 30
33	1	7436739	Glyma.01G056600	ELT_Q	0.3694	6.3602	4.36571e-07	AT5G41220.1	glutathione S-transferase THETA 3
34	1	7436739	Glyma.01G056700	ELT_Q	0.3694	6.3602	4.36571e-07
35	1	7436739	Glyma.01G056800	ELT_Q	0.3694	6.3602	4.36571e-07	AT1G69310.1	WRKY DNA-binding protein 57
36	1	7436739	Glyma.01G056900	ELT_Q	0.3694	6.3602	4.36571e-07	AT1G26610.1	C2H2-like zinc finger protein
37	1	7436739	Glyma.01G057000	ELT_Q	0.3694	6.3602	4.36571e-07	ATCG00065.1	ribosomal protein S12A
38	1	7436739	Glyma.01G057100	ELT_Q	0.3694	6.3602	4.36571e-07	AT3G29360.1	UDP-glucose 6-dehydrogenase family protein
39	1	7436739	Glyma.01G057200	ELT_Q	0.3694	6.3602	4.36571e-07	AT1G26560.1	beta glucosidase 40
40	1	7436739	Glyma.01G057300	ELT_Q	0.3694	6.3602	4.36571e-07	AT1G26560.1	beta glucosidase 40
41	1	7436739	Glyma.01G057400	ELT_Q	0.3694	6.3602	4.36571e-07	AT1G26520.1	Cobalamin biosynthesis CobW-like protein
42	1	7436739	Glyma.01G057500	ELT_Q	0.3694	6.3602	4.36571e-07	AT1G13860.1	QUASIMODO2 LIKE 1
43	1	7436739	Glyma.01G057600	ELT_Q	0.3694	6.3602	4.36571e-07	AT1G26500.1	Pentatricopeptide repeat (PPR) superfamily protein
44	1	7436739	Glyma.01G057700	ELT_Q	0.3694	6.3602	4.36571e-07
45	1	7436739	Glyma.01G057800	ELT_Q	0.3694	6.3602	4.36571e-07	AT5G28780.1	PIF1 helicase
46	1	7436739	Glyma.01G057900	ELT_Q	0.3694	6.3602	4.36571e-07	AT3G45400.1	exostosin family protein
47	1	7436739	Glyma.01G058000	ELT_Q	0.3694	6.3602	4.36571e-07	AT1G26480.1	general regulatory factor 12
48	1	7436739	Glyma.01G058100	ELT_Q	0.3694	6.3602	4.36571e-07
49	1	7436739	Glyma.01G058200	ELT_Q	0.3694	6.3602	4.36571e-07	AT1G26460.1	Tetratricopeptide repeat (TPR)-like superfamily protein
50	1	7436739	Glyma.01G058300	ELT_Q	0.3694	6.3602	4.36571e-07	AT1G18650.1	plasmodesmata callose-binding protein 3
51	1	16834681	Glyma.01G074900	ELS_Q	0.2999	6.6289	2.35154e-07	AT4G15020.1	hAT transposon superfamily
52	1	16834681	Glyma.01G075000	ELS_Q	0.2999	6.6289	2.35154e-07	AT4G35670.1	Pectin lyase-like superfamily protein
53	1	16834681	Glyma.01G075100	ELS_Q	0.2999	6.6289	2.35154e-07	AT2G45030.1	Translation elongation factor EFG/EF2 protein
54	1	16834681	Glyma.01G075200	ELS_Q	0.2999	6.6289	2.35154e-07
55	1	16834681	Glyma.01G075300	ELS_Q	0.2999	6.6289	2.35154e-07	AT1G45332.1	Translation elongation factor EFG/EF2 protein
56	1	16834681	Glyma.01G075400	ELS_Q	0.2999	6.6289	2.35154e-07	AT1G45332.1	Translation elongation factor EFG/EF2 protein
57	1	16834681	Glyma.01G075500	ELS_Q	0.2999	6.6289	2.35154e-07
58	1	16834681	Glyma.01G075600	ELS_Q	0.2999	6.6289	2.35154e-07	AT5G15870.1	glycosyl hydrolase family 81 protein
59	1	16834681	Glyma.01G075700	ELS_Q	0.2999	6.6289	2.35154e-07	AT5G22580.1	Stress responsive A/B Barrel Domain
60	1	16834681	Glyma.01G075800	ELS_Q	0.2999	6.6289	2.35154e-07	AT1G27370.1	squamosa promoter binding protein-like 10
61	2	10379294	Glyma.02G108300	ELS_Q	0.6643	23.0007	1.00027e-23	AT1G26800.1	RING/U-box superfamily protein
62	2	10379294	Glyma.02G108400	ELS_Q	0.6643	23.0007	1.00027e-23	AT1G14190.1	Glucose-methanol-choline (GMC) oxidoreductase family protein
63	2	10379294	Glyma.02G108500	ELS_Q	0.6643	23.0007	1.00027e-23	AT1G69580.1	Homeodomain-like superfamily protein
64	2	10379294	Glyma.02G108600	ELS_Q	0.6643	23.0007	1.00027e-23	AT5G39660.1	cycling DOF factor 2
65	2	10379294	Glyma.02G108700	ELS_Q	0.6643	23.0007	1.00027e-23	AT3G29000.1	Calcium-binding EF-hand family protein
66	2	10379294	Glyma.02G108800	ELS_Q	0.6643	23.0007	1.00027e-23	AT1G69560.1	myb domain protein 105
67	2	10379294	Glyma.02G108900	ELS_Q	0.6643	23.0007	1.00027e-23	AT2G03050.1	Mitochondrial transcription termination factor family protein
68	2	10379294	Glyma.02G109000	ELS_Q	0.6643	23.0007	1.00027e-23	AT2G03060.1	AGAMOUS-like 30
69	2	10379294	Glyma.02G109100	ELS_Q	0.6643	23.0007	1.00027e-23	AT1G69530.1	expansin A1
70	2	10379294	Glyma.02G109200	ELS_Q	0.6643	23.0007	1.00027e-23	AT1G14180.1	RING/U-box superfamily protein
71	2	10379294	Glyma.02G109300	ELS_Q	0.6643	23.0007	1.00027e-23	AT1G69523.1	S-adenosyl-L-methionine-dependent methyltransferases superfamily protein
72	2	10379294	Glyma.02G109400	ELS_Q	0.6643	23.0007	1.00027e-23	AT5G64130.1	cAMP-regulated phosphoprotein 19-related protein
73	2	10379294	Glyma.02G109500	ELS_Q	0.6643	23.0007	1.00027e-23
74	2	10379294	Glyma.02G109600	ELS_Q	0.6643	23.0007	1.00027e-23	AT5G15290.1	Uncharacterised protein family (UPF0497)
75	2	10379294	Glyma.02G109700	ELS_Q	0.6643	23.0007	1.00027e-23	AT1G18720.1	Protein of unknown function (DUF962)
76	2	10379294	Glyma.02G109800	ELS_Q	0.6643	23.0007	1.00027e-23	AT1G69490.1	NAC-like, activated by AP3/PI
77	2	10379294	Glyma.02G109900	ELS_Q	0.6643	23.0007	1.00027e-23	AT2G03150.1	ATP/GTP-binding protein family
78	2	10379294	Glyma.02G110000	ELS_Q	0.6643	23.0007	1.00027e-23	AT5G15310.1	myb domain protein 16
79	2	12076792	Glyma.02G121600	ELT_QEI	2.1535	29.2779	5.28663e-30	AT1G69120.1	K-box region and MADS-box transcription factor family protein
80	2	12076792	Glyma.02G121700	ELT_QEI	2.1535	29.2779	5.28663e-30	AT5G15790.1	RING/U-box superfamily protein
81	2	12076792	Glyma.02G121800	ELT_QEI	2.1535	29.2779	5.28663e-30	AT2G03720.1	Adenine nucleotide alpha hydrolases-like superfamily protein
82	2	12076792	Glyma.02G121900	ELT_QEI	2.1535	29.2779	5.28663e-30	AT3G51550.1	Malectin/receptor-like protein kinase family protein
83	2	12076792	Glyma.02G122000	ELT_QEI	2.1535	29.2779	5.28663e-30	AT3G51550.1	Malectin/receptor-like protein kinase family protein
84	2	12076792	Glyma.02G122100	ELT_QEI	2.1535	29.2779	5.28663e-30	AT5G50740.1	Heavy metal transport/detoxification superfamily protein
85	2	12076792	Glyma.02G122200	ELT_QEI	2.1535	29.2779	5.28663e-30	AT1G69060.1	Chaperone DnaJ-domain superfamily protein
86	2	12076792	Glyma.02G122300	ELT_QEI	2.1535	29.2779	5.28663e-30
87	2	12076792	Glyma.02G122400	ELT_QEI	2.1535	29.2779	5.28663e-30	AT1G69050.1
88	2	12076792	Glyma.02G122500	ELT_QEI	2.1535	29.2779	5.28663e-30	AT1G69040.2	ACT domain repeat 4
89	2	12076792	Glyma.02G122600	ELT_QEI	2.1535	29.2779	5.28663e-30	AT4G15090.1	FRS (FAR1 Related Sequences) transcription factor family
90	2	12076792	Glyma.02G122700	ELT_QEI	2.1535	29.2779	5.28663e-30	AT2G03810.1	18S pre-ribosomal assembly protein gar2-related
91	2	12076792	Glyma.02G122800	ELT_QEI	2.1535	29.2779	5.28663e-30	AT2G03830.1
92	2	12076792	Glyma.02G122900	ELT_QEI	2.1535	29.2779	5.28663e-30	AT1G26300.1	BSD domain-containing protein
93	2	12076792	Glyma.02G123000	ELT_QEI	2.1535	29.2779	5.28663e-30	AT5G22860.1	Serine carboxypeptidase S28 family protein
94	2	12076792	Glyma.02G123100	ELT_QEI	2.1535	29.2779	5.28663e-30	AT1G69020.1	Prolyl oligopeptidase family protein
95	2	12076792	Glyma.02G123200	ELT_QEI	2.1535	29.2779	5.28663e-30	AT5G15740.1	O-fucosyltransferase family protein
96	2	28051825	Glyma.02G174500	ELS_Q	0.2455	6.6424	3.18987e-08	AT3G13770.1	Pentatricopeptide repeat (PPR) superfamily protein
97	2	28051825	Glyma.02G174600	ELS_Q	0.2455	6.6424	3.18987e-08	AT5G51150.1	Mitochondrial import inner membrane translocase subunit Tim17/Tim22/Tim23 family protein
98	2	28051825	Glyma.02G174700	ELS_Q	0.2455	6.6424	3.18987e-08	AT4G27510.1
99	2	28051825	Glyma.02G174800	ELS_Q	0.2455	6.6424	3.18987e-08	AT3G57800.2	basic helix-loop-helix (bHLH) DNA-binding superfamily protein
100	2	28051825	Glyma.02G174900	ELS_Q	0.2455	6.6424	3.18987e-08	AT5G41980.1
101	2	28051825	Glyma.02G175000	ELS_Q	0.2455	6.6424	3.18987e-08
102	2	28051825	Glyma.02G175100	ELS_Q	0.2455	6.6424	3.18987e-08
103	2	28051825	Glyma.02G175200	ELS_Q	0.2455	6.6424	3.18987e-08	AT3G51690.1	PIF1 helicase
104	2	28051825	Glyma.02G175300	ELS_Q	0.2455	6.6424	3.18987e-08	AT5G28780.1	PIF1 helicase
105	2	28051825	Glyma.02G175400	ELS_Q	0.2455	6.6424	3.18987e-08	AT3G12180.1	Cornichon family protein
106	2	28051825	Glyma.02G175500	ELS_Q	0.2455	6.6424	3.18987e-08	AT3G57830.1	Leucine-rich repeat protein kinase family protein
107	2	34143263	Glyma.02G186600	ELT_Q	0.3046	4.2902	5.12815e-05	AT2G41540.1	6-phosphogluconate dehydrogenase family protein
108	2	34143263	Glyma.02G186700	ELT_Q	0.3046	4.2902	5.12815e-05	AT2G41530.1	S-formylglutathione hydrolase
109	2	34143263	Glyma.02G186800	ELT_Q	0.3046	4.2902	5.12815e-05	AT5G20950.1	Glycosyl hydrolase family protein
110	2	34143263	Glyma.02G186900	ELT_Q	0.3046	4.2902	5.12815e-05	AT5G04170.1	Calcium-binding EF-hand family protein
111	2	40919765	Glyma.02G220700	ELS_Q	0.3491	22.546	2.84971e-23	AT3G49590.1	Autophagy-related protein 13
112	2	40919765	Glyma.02G220800	ELS_Q	0.3491	22.546	2.84971e-23	AT3G13570.1	SC35-like splicing factor 30A
113	2	40919765	Glyma.02G220900	ELS_Q	0.3491	22.546	2.84971e-23	AT5G24620.1	Pathogenesis-related thaumatin superfamily protein
114	2	40919765	Glyma.02G221000	ELS_Q	0.3491	22.546	2.84971e-23	AT5G24610.1
115	2	40919765	Glyma.02G221100	ELS_Q	0.3491	22.546	2.84971e-23	AT1G04635.1	ribonuclease P family protein / Rpp14 family protein
116	2	40919765	Glyma.02G221200	ELS_Q	0.3491	22.546	2.84971e-23	AT5G24600.1	Protein of unknown function, DUF599
117	2	40919765	Glyma.02G221300	ELS_Q	0.3491	22.546	2.84971e-23	AT5G54090.1	DNA mismatch repair protein MutS, type 2
118	2	40919765	Glyma.02G221400	ELS_Q	0.3491	22.546	2.84971e-23	ATCG00170.1	DNA-directed RNA polymerase family protein
119	2	40919765	Glyma.02G221500	ELS_Q	0.3491	22.546	2.84971e-23	ATCG00160.1	ribosomal protein S2
120	2	40919765	Glyma.02G221600	ELS_Q	0.3491	22.546	2.84971e-23	AT1G18010.1	Major facilitator superfamily protein
121	2	40919765	Glyma.02G221700	ELS_Q	0.3491	22.546	2.84971e-23	AT4G01575.1	serine protease inhibitor, Kazal-type family protein
122	2	40919765	Glyma.02G221800	ELS_Q	0.3491	22.546	2.84971e-23
123	2	40919765	Glyma.02G221900	ELS_Q	0.3491	22.546	2.84971e-23	AT5G55830.1	Concanavalin A-like lectin protein kinase family protein
124	2	40919765	Glyma.02G222000	ELS_Q	0.3491	22.546	2.84971e-23	AT1G09380.1	nodulin MtN21 /EamA-like transporter family protein
125	2	40919765	Glyma.02G222100	ELS_Q	0.3491	22.546	2.84971e-23	AT5G07050.1	nodulin MtN21 /EamA-like transporter family protein
126	2	40919765	Glyma.02G222200	ELS_Q	0.3491	22.546	2.84971e-23	AT5G54130.2	Calcium-binding endonuclease/exonuclease/phosphatase family
127	2	40919765	Glyma.02G222300	ELS_Q	0.3491	22.546	2.84971e-23	AT4G35580.2	NAC transcription factor-like 9
128	2	40919765	Glyma.02G222400	ELS_Q	0.3491	22.546	2.84971e-23	AT2G36460.1	Aldolase superfamily protein
129	2	40919765	Glyma.02G222500	ELS_Q	0.3491	22.546	2.84971e-23	AT1G63860.1	Disease resistance protein (TIR-NBS-LRR class) family
130	2	40919765	Glyma.02G222600	ELS_Q	0.3491	22.546	2.84971e-23	AT5G24580.1	Heavy metal transport/detoxification superfamily protein
131	2	40919765	Glyma.02G222700	ELS_Q	0.3491	22.546	2.84971e-23	AT4G27590.1	Heavy metal transport/detoxification superfamily protein
132	2	40919765	Glyma.02G222800	ELS_Q	0.3491	22.546	2.84971e-23
133	2	40919765	Glyma.02G222900	ELS_Q	0.3491	22.546	2.84971e-23	AT3G13222.1	GBF-interacting protein 1
134	2	40919765	Glyma.02G223000	ELS_Q	0.3491	22.546	2.84971e-23	AT4G02990.1	Mitochondrial transcription termination factor family protein
135	2	40919765	Glyma.02G223100	ELS_Q	0.3491	22.546	2.84971e-23	AT4G12710.1	ARM repeat superfamily protein
136	2	40919765	Glyma.02G223200	ELS_Q	0.3491	22.546	2.84971e-23
137	2	40919765	Glyma.02G223300	ELS_Q	0.3491	22.546	2.84971e-23	AT4G12700.1
138	2	40919765	Glyma.02G223400	ELS_Q	0.3491	22.546	2.84971e-23	AT2G04270.1	RNAse E/G-like
139	2	40919765	Glyma.02G223500	ELS_Q	0.3491	22.546	2.84971e-23
140	2	40919765	Glyma.02G223600	ELS_Q	0.3491	22.546	2.84971e-23	AT2G04240.1	RING/U-box superfamily protein
141	2	40919765	Glyma.02G223700	ELS_Q	0.3491	22.546	2.84971e-23	AT5G48250.1	B-box type zinc finger protein with CCT domain
142	2	40919765	Glyma.02G223800	ELS_Q	0.3491	22.546	2.84971e-23	AT1G14470.1	Pentatricopeptide repeat (PPR) superfamily protein
143	2	40919765	Glyma.02G223900	ELS_Q	0.3491	22.546	2.84971e-23	AT2G04220.1	Plant protein of unknown function (DUF868)
144	2	46112942	Glyma.02G278600	ELT_Q	0.8314	47.0738	8.47136e-48	AT5G12200.1	pyrimidine 2
145	2	46112942	Glyma.02G278700	ELT_Q	0.8314	47.0738	8.47136e-48	AT5G19473.1	RPM1-interacting protein 4 (RIN4) family protein
146	2	46112942	Glyma.02G278800	ELT_Q	0.8314	47.0738	8.47136e-48	AT5G12190.1	RNA-binding (RRM/RBD/RNP motifs) family protein
147	3	2420131	Glyma.03G022800	ELS_Q	0.5575	19.6132	2.44066e-20	AT1G24620.1	EF hand calcium-binding protein family
148	3	2420131	Glyma.03G022900	ELS_Q	0.5575	19.6132	2.44066e-20	AT3G60860.1	SEC7-like guanine nucleotide exchange family protein
149	3	2420131	Glyma.03G023000	ELS_Q	0.5575	19.6132	2.44066e-20	AT2G45420.1	LOB domain-containing protein 18
150	3	2420131	Glyma.03G023100	ELS_Q	0.5575	19.6132	2.44066e-20	AT4G00210.1	LOB domain-containing protein 31
151	3	2420131	Glyma.03G023200	ELS_Q	0.5575	19.6132	2.44066e-20
152	3	4533673	Glyma.03G036800	ELT_Q	0.4098	7.8257	1.49498e-08	AT1G55520.1	TATA binding protein 2
153	3	4533673	Glyma.03G036900	ELT_Q	0.4098	7.8257	1.49498e-08	AT5G58380.1	SOS3-interacting protein 1
154	3	4533673	Glyma.03G037000	ELT_Q	0.4098	7.8257	1.49498e-08	AT3G14460.1	LRR and NB-ARC domains-containing disease resistance protein
155	3	4533673	Glyma.03G037100	ELT_Q	0.4098	7.8257	1.49498e-08	AT3G14460.1	LRR and NB-ARC domains-containing disease resistance protein
156	3	4533673	Glyma.03G037200	ELT_Q	0.4098	7.8257	1.49498e-08	AT5G01810.1	CBL-interacting protein kinase 15
157	3	4533673	Glyma.03G037300	ELT_Q	0.4098	7.8257	1.49498e-08	AT3G14460.1	LRR and NB-ARC domains-containing disease resistance protein
158	3	4533673	Glyma.03G037400	ELT_Q	0.4098	7.8257	1.49498e-08	AT3G14460.1	LRR and NB-ARC domains-containing disease resistance protein
159	3	4533673	Glyma.03G037500	ELT_Q	0.4098	7.8257	1.49498e-08	AT2G38370.1	Plant protein of unknown function (DUF827)
160	3	4533673	Glyma.03G037600	ELT_Q	0.4098	7.8257	1.49498e-08	AT5G01790.1
161	3	4533673	Glyma.03G037700	ELT_Q	0.4098	7.8257	1.49498e-08	AT2G30970.1	aspartate aminotransferase 1
162	3	4533673	Glyma.03G037800	ELT_Q	0.4098	7.8257	1.49498e-08	AT5G05340.1	Peroxidase superfamily protein
163	3	4533673	Glyma.03G037900	ELT_Q	0.4098	7.8257	1.49498e-08	AT5G05340.1	Peroxidase superfamily protein
164	3	4533673/4894384	Glyma.03G038000	ELT_Q/ELT_QEI	0.4098	7.8257	1.49498e-08	AT2G33820.1	Mitochondrial substrate carrier family protein
165	3	4533673/4894384	Glyma.03G038100	ELT_Q/ELT_QEI	0.4098	7.8257	1.49498e-08	AT5G05340.1	Peroxidase superfamily protein
166	3	4533673/4894384	Glyma.03G038200	ELT_Q/ELT_QEI	0.4098	7.8257	1.49498e-08	AT5G05340.1	Peroxidase superfamily protein
167	3	4533673/4894384	Glyma.03G038300	ELT_Q/ELT_QEI	0.4098	7.8257	1.49498e-08	AT5G05340.1	Peroxidase superfamily protein
168	3	4533673/4894384	Glyma.03G038400	ELT_Q/ELT_QEI	0.4098	7.8257	1.49498e-08	AT2G06541.1	TTF-type zinc finger protein with HAT dimerisation domain
169	3	4533673/4894384	Glyma.03G038500	ELT_Q/ELT_QEI	0.4098	7.8257	1.49498e-08	AT5G05340.1	Peroxidase superfamily protein
170	3	4894384	Glyma.03G038600	ELT_QEI	0.648	9.0598	8.72137e-10	AT5G05340.1	Peroxidase superfamily protein
171	3	4894384	Glyma.03G038700	ELT_QEI	0.648	9.0598	8.72137e-10	AT5G05340.1	Peroxidase superfamily protein
172	3	4894384	Glyma.03G038800	ELT_QEI	0.648	9.0598	8.72137e-10	AT3G14460.1	LRR and NB-ARC domains-containing disease resistance protein
173	3	4894384	Glyma.03G038900	ELT_QEI	0.648	9.0598	8.72137e-10	AT5G45820.1	CBL-interacting protein kinase 20
174	3	4894384	Glyma.03G039000	ELT_QEI	0.648	9.0598	8.72137e-10	AT3G14470.1	NB-ARC domain-containing disease resistance protein
175	3	4894384	Glyma.03G039100	ELT_QEI	0.648	9.0598	8.72137e-10	AT3G14470.1	NB-ARC domain-containing disease resistance protein
176	3	4894384	Glyma.03G039200	ELT_QEI	0.648	9.0598	8.72137e-10	AT3G14460.1	LRR and NB-ARC domains-containing disease resistance protein
177	3	4894384	Glyma.03G039300	ELT_QEI	0.648	9.0598	8.72137e-10	AT3G14460.1	LRR and NB-ARC domains-containing disease resistance protein
178	3	4894384	Glyma.03G039400	ELT_QEI	0.648	9.0598	8.72137e-10
179	3	4894384	Glyma.03G039500	ELT_QEI	0.648	9.0598	8.72137e-10	AT3G14460.1	LRR and NB-ARC domains-containing disease resistance protein
180	3	4894384	Glyma.03G039600	ELT_QEI	0.648	9.0598	8.72137e-10	AT5G58390.1	Peroxidase superfamily protein
181	3	4894384	Glyma.03G039700	ELT_QEI	0.648	9.0598	8.72137e-10	AT5G05340.1	Peroxidase superfamily protein
182	3	4894384	Glyma.03G039800	ELT_QEI	0.648	9.0598	8.72137e-10	AT5G05340.1	Peroxidase superfamily protein
183	3	4894384	Glyma.03G039900	ELT_QEI	0.648	9.0598	8.72137e-10	AT3G52140.2	tetratricopeptide repeat (TPR)-containing protein
184	3	5570825	Glyma.03G042900	ELT_Q	0.3972	6.1011	7.92787e-07
185	3	5570825	Glyma.03G043000	ELT_Q	0.3972	6.1011	7.92787e-07	AT3G14460.1	LRR and NB-ARC domains-containing disease resistance protein
186	3	5570825	Glyma.03G043100	ELT_Q	0.3972	6.1011	7.92787e-07	AT1G79630.1	Protein phosphatase 2C family protein
187	3	5570825	Glyma.03G043200	ELT_Q	0.3972	6.1011	7.92787e-07	AT3G14460.1	LRR and NB-ARC domains-containing disease resistance protein
188	3	5570825	Glyma.03G043300	ELT_Q	0.3972	6.1011	7.92787e-07	AT5G01710.1	methyltransferases
189	3	5570825	Glyma.03G043400	ELT_Q	0.3972	6.1011	7.92787e-07
190	3	5570825	Glyma.03G043500	ELT_Q	0.3972	6.1011	7.92787e-07	AT3G14460.1	LRR and NB-ARC domains-containing disease resistance protein
191	3	5570825	Glyma.03G043600	ELT_Q	0.3972	6.1011	7.92787e-07	AT3G14470.1	NB-ARC domain-containing disease resistance protein
192	3	5570825	Glyma.03G043700	ELT_Q	0.3972	6.1011	7.92787e-07	AT1G79630.2	Protein phosphatase 2C family protein
193	3	5570825	Glyma.03G043800	ELT_Q	0.3972	6.1011	7.92787e-07
194	3	5570825	Glyma.03G043900	ELT_Q	0.3972	6.1011	7.92787e-07	AT3G14460.1	LRR and NB-ARC domains-containing disease resistance protein
195	3	5570825	Glyma.03G044000	ELT_Q	0.3972	6.1011	7.92787e-07	AT3G14460.1	LRR and NB-ARC domains-containing disease resistance protein
196	3	5570825	Glyma.03G044100	ELT_Q	0.3972	6.1011	7.92787e-07	AT1G79630.2	Protein phosphatase 2C family protein
197	3	5570825	Glyma.03G044200	ELT_Q	0.3972	6.1011	7.92787e-07	AT3G51670.1	SEC14 cytosolic factor family protein / phosphoglyceride transfer family protein
198	3	5570825	Glyma.03G044300	ELT_Q	0.3972	6.1011	7.92787e-07	AT1G58170.1	Disease resistance-responsive (dirigent-like protein) family protein
199	3	5570825	Glyma.03G044400	ELT_Q	0.3972	6.1011	7.92787e-07	AT5G49040.1	Disease resistance-responsive (dirigent-like protein) family protein
200	3	5570825	Glyma.03G044500	ELT_Q	0.3972	6.1011	7.92787e-07	AT5G49040.1	Disease resistance-responsive (dirigent-like protein) family protein
201	3	5570825	Glyma.03G044600	ELT_Q	0.3972	6.1011	7.92787e-07
202	3	5570825	Glyma.03G044700	ELT_Q	0.3972	6.1011	7.92787e-07	AT5G24310.1	ABL interactor-like protein 3
203	3	5570825	Glyma.03G044800	ELT_Q	0.3972	6.1011	7.92787e-07	AT3G42170.1	BED zinc finger ;hAT family dimerisation domain
204	3	5570825	Glyma.03G044900	ELT_Q	0.3972	6.1011	7.92787e-07	AT5G49040.1	Disease resistance-responsive (dirigent-like protein) family protein
205	3	5570825	Glyma.03G045000	ELT_Q	0.3972	6.1011	7.92787e-07	AT3G14460.1	LRR and NB-ARC domains-containing disease resistance protein
206	3	5570825	Glyma.03G045100	ELT_Q	0.3972	6.1011	7.92787e-07
207	3	5570825	Glyma.03G045200	ELT_Q	0.3972	6.1011	7.92787e-07	AT5G36250.1	Protein phosphatase 2C family protein
208	3	5570825	Glyma.03G045300	ELT_Q	0.3972	6.1011	7.92787e-07	AT3G14470.1	NB-ARC domain-containing disease resistance protein
209	3	8971638	Glyma.03G060000	ELT_Q	0.1533	6.287	5.16692e-07	AT5G01520.1	RING/U-box superfamily protein
210	3	8971638	Glyma.03G060100	ELT_Q	0.1533	6.287	5.16692e-07	AT5G60540.1	pyridoxine biosynthesis 2
211	3	8971638	Glyma.03G060200	ELT_Q	0.1533	6.287	5.16692e-07	AT3G51880.2	high mobility group B1
212	3	8971638	Glyma.03G060300	ELT_Q	0.1533	6.287	5.16692e-07	AT3G08940.2	light harvesting complex photosystem II
213	3	8971638	Glyma.03G060400	ELT_Q	0.1533	6.287	5.16692e-07	AT5G33340.1	Eukaryotic aspartyl protease family protein
214	3	8971638	Glyma.03G060500	ELT_Q	0.1533	6.287	5.16692e-07	AT2G01050.1	zinc ion binding;nucleic acid binding
215	3	8971638	Glyma.03G060600	ELT_Q	0.1533	6.287	5.16692e-07
216	3	8971638	Glyma.03G060700	ELT_Q	0.1533	6.287	5.16692e-07
217	3	8971638	Glyma.03G060800	ELT_Q	0.1533	6.287	5.16692e-07
218	3	8971638	Glyma.03G060900	ELT_Q	0.1533	6.287	5.16692e-07	AT2G46240.1	BCL-2-associated athanogene 6
219	3	8971638	Glyma.03G061000	ELT_Q	0.1533	6.287	5.16692e-07	AT2G45270.1	glycoprotease 1
220	3	8971638	Glyma.03G061100	ELT_Q	0.1533	6.287	5.16692e-07
221	3	16586910	Glyma.03G070400	ELT_Q	0.2403	3.8301	0.000147915	AT3G09350.1	Fes1A
222	3	16586910	Glyma.03G070500	ELT_Q	0.2403	3.8301	0.000147915	AT4G23980.1	auxin response factor 9
223	3	21724624	Glyma.03G080600	ELS_Q	0.917	14.3882	4.09587e-15	AT5G48800.1	Phototropic-responsive NPH3 family protein
224	3	21724624	Glyma.03G080700	ELS_Q	0.917	14.3882	4.09587e-15	AT5G47670.1	nuclear factor Y, subunit B6
225	3	21724624	Glyma.03G080800	ELS_Q	0.917	14.3882	4.09587e-15
226	3	21724624	Glyma.03G080900	ELS_Q	0.917	14.3882	4.09587e-15	AT4G24370.1
227	3	21724624	Glyma.03G081000	ELS_Q	0.917	14.3882	4.09587e-15
228	3	21724624	Glyma.03G081100	ELS_Q	0.917	14.3882	4.09587e-15	AT5G28780.1	PIF1 helicase
229	3	21724624	Glyma.03G081200	ELS_Q	0.917	14.3882	4.09587e-15	AT2G01900.1	DNAse I-like superfamily protein
230	3	21724624	Glyma.03G081300	ELS_Q	0.917	14.3882	4.09587e-15	AT3G24870.1	Helicase/SANT-associated, DNA binding protein
231	3	21724624	Glyma.03G081400	ELS_Q	0.917	14.3882	4.09587e-15
232	3	25302182	Glyma.03G085500	ELT_QEI	0.3762	5.2864	5.17325e-06	AT3G07270.2	GTP cyclohydrolase I
233	3	25302182	Glyma.03G085600	ELT_QEI	0.3762	5.2864	5.17325e-06	AT5G17380.1	Thiamine pyrophosphate dependent pyruvate decarboxylase family protein
234	3	25302182	Glyma.03G085700	ELT_QEI	0.3762	5.2864	5.17325e-06	AT4G13020.1	Protein kinase superfamily protein
235	3	25302182	Glyma.03G085800	ELT_QEI	0.3762	5.2864	5.17325e-06
236	3	25302182	Glyma.03G085900	ELT_QEI	0.3762	5.2864	5.17325e-06	AT3G07310.1	Protein of unknown function (DUF760)
237	3	25302182	Glyma.03G086000	ELT_QEI	0.3762	5.2864	5.17325e-06	AT1G63440.1	heavy metal atpase 5
238	3	25302182	Glyma.03G086100	ELT_QEI	0.3762	5.2864	5.17325e-06	AT5G48580.1	FK506- and rapamycin-binding protein 15 kD-2
239	3	25302182	Glyma.03G086200	ELT_QEI	0.3762	5.2864	5.17325e-06	AT3G25230.1	rotamase FKBP 1
240	3	25302182	Glyma.03G086300	ELT_QEI	0.3762	5.2864	5.17325e-06
241	3	26197109	Glyma.03G087300	ELT_Q	0.3601	7.1201	7.58793e-08	AT5G45600.1	YEATS family protein
242	3	26197109	Glyma.03G087400	ELT_Q	0.3601	7.1201	7.58793e-08	AT2G32680.1	receptor like protein 23
243	3	26197109	Glyma.03G087500	ELT_Q	0.3601	7.1201	7.58793e-08	AT5G36930.2	Disease resistance protein (TIR-NBS-LRR class) family
244	3	26197109	Glyma.03G087600	ELT_Q	0.3601	7.1201	7.58793e-08	AT5G36930.2	Disease resistance protein (TIR-NBS-LRR class) family
245	3	26197109	Glyma.03G087700	ELT_Q	0.3601	7.1201	7.58793e-08	AT5G36930.2	Disease resistance protein (TIR-NBS-LRR class) family
246	3	26197109	Glyma.03G087800	ELT_Q	0.3601	7.1201	7.58793e-08	AT5G36930.2	Disease resistance protein (TIR-NBS-LRR class) family
247	3	26197109	Glyma.03G087900	ELT_Q	0.3601	7.1201	7.58793e-08
248	3	26197109	Glyma.03G088000	ELT_Q	0.3601	7.1201	7.58793e-08	AT5G36930.2	Disease resistance protein (TIR-NBS-LRR class) family
249	3	26197109	Glyma.03G088100	ELT_Q	0.3601	7.1201	7.58793e-08	AT5G36930.2	Disease resistance protein (TIR-NBS-LRR class) family
250	3	26197109	Glyma.03G088200	ELT_Q	0.3601	7.1201	7.58793e-08	AT1G09890.1	Rhamnogalacturonate lyase family protein
251	3	26197109	Glyma.03G088300	ELT_Q	0.3601	7.1201	7.58793e-08
252	3	26197109	Glyma.03G088400	ELT_Q	0.3601	7.1201	7.58793e-08	AT3G07370.1	carboxyl terminus of HSC70-interacting protein
253	3	26197109	Glyma.03G088500	ELT_Q	0.3601	7.1201	7.58793e-08	AT5G09920.1	RNA polymerase II, Rpb4, core protein
254	3	26197109	Glyma.03G088600	ELT_Q	0.3601	7.1201	7.58793e-08
255	3	26197109	Glyma.03G088700	ELT_Q	0.3601	7.1201	7.58793e-08
256	3	26197109	Glyma.03G088800	ELT_Q	0.3601	7.1201	7.58793e-08	AT3G25250.1	AGC (cAMP-dependent, cGMP-dependent and protein kinase C) kinase family protein
257	3	32657738	Glyma.03G117300	ELS_Q	0.209	3.4349	0.00036751	AT3G60510.3	ATP-dependent caseinolytic (Clp) protease/crotonase family protein
258	3	32657738	Glyma.03G117400	ELS_Q	0.209	3.4349	0.00036751	AT3G15351.1
259	3	32657738	Glyma.03G117500	ELS_Q	0.209	3.4349	0.00036751	AT1G02065.1	squamosa promoter binding protein-like 8
260	3	32657738	Glyma.03G117600	ELS_Q	0.209	3.4349	0.00036751	AT2G42200.1	squamosa promoter binding protein-like 9
261	3	35863419	Glyma.03G142000	ELT_Q	0.5768	20.216	6.09167e-21	AT5G06900.1	cytochrome P450, family 93, subfamily D, polypeptide 1
262	3	35863419	Glyma.03G142100	ELT_Q	0.5768	20.216	6.09167e-21	AT5G06900.1	cytochrome P450, family 93, subfamily D, polypeptide 1
263	3	35863419	Glyma.03G142200	ELT_Q	0.5768	20.216	6.09167e-21	AT3G45030.1	Ribosomal protein S10p/S20e family protein
264	3	35863419	Glyma.03G142300	ELT_Q	0.5768	20.216	6.09167e-21	AT3G45030.1	Ribosomal protein S10p/S20e family protein
265	3	35863419	Glyma.03G142400	ELT_Q	0.5768	20.216	6.09167e-21	AT5G06839.3	bZIP transcription factor family protein
266	3	35863419	Glyma.03G142500	ELT_Q	0.5768	20.216	6.09167e-21	AT3G57880.1	Calcium-dependent lipid-binding (CaLB domain) plant phosphoribosyltransferase family protein
267	3	35863419	Glyma.03G142600	ELT_Q	0.5768	20.216	6.09167e-21	AT3G57890.1	Tubulin binding cofactor C domain-containing protein
268	3	35863419	Glyma.03G142700	ELT_Q	0.5768	20.216	6.09167e-21	AT3G57890.1	Tubulin binding cofactor C domain-containing protein
269	3	35863419	Glyma.03G142800	ELT_Q	0.5768	20.216	6.09167e-21	AT2G42220.1	Rhodanese/Cell cycle control phosphatase superfamily protein
270	3	35863419	Glyma.03G142900	ELT_Q	0.5768	20.216	6.09167e-21	AT2G42210.2	Mitochondrial import inner membrane translocase subunit Tim17/Tim22/Tim23 family protein
271	4	10910698	Glyma.04G105800	ELT_Q	0.8426	16.6303	2.34604e-17	AT3G60340.1	alpha/beta-Hydrolases superfamily protein
272	4	10910698	Glyma.04G105900	ELT_Q	0.8426	16.6303	2.34604e-17	AT1G55020.1	lipoxygenase 1
273	4	10910698	Glyma.04G106000	ELT_Q	0.8426	16.6303	2.34604e-17	AT5G51040.3
274	4	10910698	Glyma.04G106100	ELT_Q	0.8426	16.6303	2.34604e-17
275	4	10910698	Glyma.04G106200	ELT_Q	0.8426	16.6303	2.34604e-17	AT2G44990.1	carotenoid cleavage dioxygenase 7
276	4	10910698	Glyma.04G106300	ELT_Q	0.8426	16.6303	2.34604e-17	AT1G73720.1	transducin family protein / WD-40 repeat family protein
277	4	15439303	Glyma.04G121400	ELT_Q	0.4336	6.0964	8.01377e-07	AT4G36360.1	beta-galactosidase 3
278	4	15439303	Glyma.04G121500	ELT_Q	0.4336	6.0964	8.01377e-07	AT5G66020.1	Phosphoinositide phosphatase family protein
279	4	15439303	Glyma.04G121600	ELT_Q	0.4336	6.0964	8.01377e-07	AT1G68310.1	Protein of unknown function (DUF59)
280	4	15439303	Glyma.04G121700	ELT_Q	0.4336	6.0964	8.01377e-07
281	4	15439303	Glyma.04G121800	ELT_Q	0.4336	6.0964	8.01377e-07	AT2G02650.1	Ribonuclease H-like superfamily protein
282	4	15439303	Glyma.04G121900	ELT_Q	0.4336	6.0964	8.01377e-07	AT5G07040.1	RING/U-box superfamily protein
283	4	15439303	Glyma.04G122000	ELT_Q	0.4336	6.0964	8.01377e-07
284	4	15439303	Glyma.04G122100	ELT_Q	0.4336	6.0964	8.01377e-07	AT1G08845.2	Ribosomal L18p/L5e family protein
285	4	15439303	Glyma.04G122200	ELT_Q	0.4336	6.0964	8.01377e-07	AT2G32910.1	DCD (Development and Cell Death) domain protein
286	4	15439303	Glyma.04G122300	ELT_Q	0.4336	6.0964	8.01377e-07
287	4	15439303	Glyma.04G122400	ELT_Q	0.4336	6.0964	8.01377e-07	AT2G32910.1	DCD (Development and Cell Death) domain protein
288	4	20090291	Glyma.04G135300	ELT_Q	0.4975	11.553	2.80181e-12	AT3G06730.1	Thioredoxin z
289	4	20090291	Glyma.04G135400	ELT_Q	0.4975	11.553	2.80181e-12	AT3G54390.1	sequence-specific DNA binding transcription factors
290	4	20090291	Glyma.04G135500	ELT_Q	0.4975	11.553	2.80181e-12
291	4	20090291	Glyma.04G135600	ELT_Q	0.4975	11.553	2.80181e-12	AT4G15020.1	hAT transposon superfamily
292	4	20090291	Glyma.04G135700	ELT_Q	0.4975	11.553	2.80181e-12	AT1G08315.1	ARM repeat superfamily protein
293	4	20090291	Glyma.04G135800	ELT_Q	0.4975	11.553	2.80181e-12
294	4	20090291	Glyma.04G135900	ELT_Q	0.4975	11.553	2.80181e-12	ATCG00530.1	CemA-like proton extrusion protein-related
295	4	22329391/22409840	Glyma.04G139200	ELS_Q	0.273	10.4498	4.00646e-12	AT5G40950.1	ribosomal protein large subunit 27
296	4	22329391/22409840	Glyma.04G139300	ELS_Q	0.273	10.4498	4.00646e-12
297	4	22329391/22409840	Glyma.04G139400	ELS_Q	0.273	10.4498	4.00646e-12	AT2G38800.1	Plant calmodulin-binding protein-related
298	4	22329391/22409840	Glyma.04G139500	ELS_Q	0.273	10.4498	4.00646e-12
299	4	22329391/22409840	Glyma.04G139600	ELS_Q	0.273	10.4498	4.00646e-12
300	4	22329391/22409840	Glyma.04G139700	ELS_Q	0.273	10.4498	4.00646e-12	AT4G10300.1	RmlC-like cupins superfamily protein
301	4	22409840	Glyma.04G139800	ELS_Q	0.3867	6.2287	5.90939e-07	AT1G65870.1	Disease resistance-responsive (dirigent-like protein) family protein
302	4	26351924	Glyma.04G143300	ELS_Q	0.2279	21.3771	4.20387e-22	AT2G33720.1	AP2/B3-like transcriptional factor family protein
303	4	26351924	Glyma.04G143400	ELS_Q	0.2279	21.3771	4.20387e-22	AT5G28050.2	Cytidine/deoxycytidylate deaminase family protein
304	4	26351924	Glyma.04G143500	ELS_Q	0.2279	21.3771	4.20387e-22	AT2G33820.1	Mitochondrial substrate carrier family protein
305	4	26351924	Glyma.04G143600	ELS_Q	0.2279	21.3771	4.20387e-22	AT1G50300.1	TBP-associated factor 15
306	4	26351924	Glyma.04G143700	ELS_Q	0.2279	21.3771	4.20387e-22	AT3G04670.2	WRKY DNA-binding protein 39
307	4	26351924	Glyma.04G143800	ELS_Q	0.2279	21.3771	4.20387e-22	AT3G20395.1	RING/U-box superfamily protein
308	4	26351924	Glyma.04G143900	ELS_Q	0.2279	21.3771	4.20387e-22	AT5G61820.1
309	4	26351924	Glyma.04G144000	ELS_Q	0.2279	21.3771	4.20387e-22	AT5G61820.1
310	4	26351924	Glyma.04G144100	ELS_Q	0.2279	21.3771	4.20387e-22	AT5G61820.1
311	4	26351924	Glyma.04G144200	ELS_Q	0.2279	21.3771	4.20387e-22	AT5G61820.1
312	4	26351924	Glyma.04G144300	ELS_Q	0.2279	21.3771	4.20387e-22	AT1G74030.1	enolase 1
313	4	26351924	Glyma.04G144400	ELS_Q	0.2279	21.3771	4.20387e-22
314	4	26351924	Glyma.04G144500	ELS_Q	0.2279	21.3771	4.20387e-22	AT1G18520.1	tetraspanin11
315	4	26351924	Glyma.04G144600	ELS_Q	0.2279	21.3771	4.20387e-22	AT5G23050.1	acyl-activating enzyme 17
316	4	26351924	Glyma.04G144700	ELS_Q	0.2279	21.3771	4.20387e-22	AT3G59470.1	Far-red impaired responsive (FAR1) family protein
317	4	26351924	Glyma.04G144800	ELS_Q	0.2279	21.3771	4.20387e-22	AT1G18530.1	EF hand calcium-binding protein family
318	4	26351924	Glyma.04G144900	ELS_Q	0.2279	21.3771	4.20387e-22	AT1G68710.1	ATPase E1-E2 type family protein / haloacid dehalogenase-like hydrolase family protein
319	4	26351924	Glyma.04G145000	ELS_Q	0.2279	21.3771	4.20387e-22	AT5G23090.1	nuclear factor Y, subunit B13
320	4	26351924	Glyma.04G145100	ELS_Q	0.2279	21.3771	4.20387e-22	AT5G23100.1	Protein of unknown function, DUF617
321	4	33991984	Glyma.04G151700	ELT_QEI	2.7092	36.467	3.42221e-37	AT1G03390.1	HXXXD-type acyl-transferase family protein
322	4	33991984	Glyma.04G151800	ELT_QEI	2.7092	36.467	3.42221e-37	AT1G77920.1	bZIP transcription factor family protein
323	4	33991984	Glyma.04G151900	ELT_QEI	2.7092	36.467	3.42221e-37	AT3G46510.1	plant U-box 13
324	4	33991984	Glyma.04G152000	ELT_QEI	2.7092	36.467	3.42221e-37	AT4G20990.1	alpha carbonic anhydrase 4
325	4	33991984	Glyma.04G152100	ELT_QEI	2.7092	36.467	3.42221e-37	AT3G24330.1	O-Glycosyl hydrolases family 17 protein
326	4	33991984	Glyma.04G152200	ELT_QEI	2.7092	36.467	3.42221e-37	AT1G73930.1
327	4	33991984	Glyma.04G152300	ELT_QEI	2.7092	36.467	3.42221e-37	AT3G47790.1	ABC2 homolog 7
328	4	33991984	Glyma.04G152400	ELT_QEI	2.7092	36.467	3.42221e-37	AT3G18550.2	TCP family transcription factor
329	4	33991984	Glyma.04G152500	ELT_QEI	2.7092	36.467	3.42221e-37
330	4	40245220	Glyma.04G161500	ELS_Q	0.3907	8.363	5.44319e-10	AT3G51700.1	PIF1 helicase
331	4	40245220	Glyma.04G161600	ELS_Q	0.3907	8.363	5.44319e-10	AT5G08050.1	Protein of unknown function (DUF1118)
332	4	40245220	Glyma.04G161700	ELS_Q	0.3907	8.363	5.44319e-10	AT4G02550.2
333	4	40245220	Glyma.04G161800	ELS_Q	0.3907	8.363	5.44319e-10	AT3G09360.1	Cyclin/Brf1-like TBP-binding protein
334	4	40245220	Glyma.04G161900	ELS_Q	0.3907	8.363	5.44319e-10
335	4	40245220	Glyma.04G162000	ELS_Q	0.3907	8.363	5.44319e-10	AT1G53035.1
336	4	40245220	Glyma.04G162100	ELS_Q	0.3907	8.363	5.44319e-10	AT3G29575.1	ABI five binding protein 3
337	4	40245220	Glyma.04G162200	ELS_Q	0.3907	8.363	5.44319e-10	AT1G74220.1
338	4	40245220	Glyma.04G162300	ELS_Q	0.3907	8.363	5.44319e-10
339	4	40245220	Glyma.04G162400	ELS_Q	0.3907	8.363	5.44319e-10	AT5G61010.1	exocyst subunit exo70 family protein E2
340	4	40245220	Glyma.04G162500	ELS_Q	0.3907	8.363	5.44319e-10	ATMG00160.1	cytochrome oxidase 2
341	4	40245220	Glyma.04G162600	ELS_Q	0.3907	8.363	5.44319e-10	AT5G08010.1
342	4	40245220	Glyma.04G162700	ELS_Q	0.3907	8.363	5.44319e-10	AT1G18640.2	3-phosphoserine phosphatase
343	4	40245220	Glyma.04G162800	ELS_Q	0.3907	8.363	5.44319e-10	AT2G33040.1	gamma subunit of Mt ATP synthase
344	4	40245220	Glyma.04G162900	ELS_Q	0.3907	8.363	5.44319e-10
345	4	40245220	Glyma.04G163000	ELS_Q	0.3907	8.363	5.44319e-10	AT1G74240.1	Mitochondrial substrate carrier family protein
346	4	48295354	Glyma.04G210100	ELS_Q	0.6513	12.5531	2.80152e-13	AT5G09250.1	ssDNA-binding transcriptional regulator
347	4	48295354	Glyma.04G210200	ELS_Q	0.6513	12.5531	2.80152e-13	AT5G09260.1	vacuolar protein sorting-associated protein 20.2
348	4	48295354	Glyma.04G210300	ELS_Q	0.6513	12.5531	2.80152e-13
349	4	48295354	Glyma.04G210400	ELS_Q	0.6513	12.5531	2.80152e-13	AT5G63920.1	topoisomerase 3alpha
350	4	48295354	Glyma.04G210500	ELS_Q	0.6513	12.5531	2.80152e-13	AT1G77280.1	Protein kinase protein with adenine nucleotide alpha hydrolases-like domain
351	4	48295354	Glyma.04G210600	ELS_Q	0.6513	12.5531	2.80152e-13	AT4G30770.1	Putative membrane lipoprotein
352	4	48295354	Glyma.04G210700	ELS_Q	0.6513	12.5531	2.80152e-13	AT5G63960.1	DNA binding;nucleotide binding;nucleic acid binding;DNA-directed DNA polymerases;DNA-directed DNA polymerases
353	4	48295354	Glyma.04G210800	ELS_Q	0.6513	12.5531	2.80152e-13
354	4	48295354	Glyma.04G210900	ELS_Q	0.6513	12.5531	2.80152e-13	AT5G17850.1	Sodium/calcium exchanger family protein
355	4	48295354	Glyma.04G211000	ELS_Q	0.6513	12.5531	2.80152e-13	AT5G63970.1	Copine (Calcium-dependent phospholipid-binding protein) family
356	4	48295354	Glyma.04G211100	ELS_Q	0.6513	12.5531	2.80152e-13	AT5G51810.1	gibberellin 20 oxidase 2
357	4	48295354	Glyma.04G211200	ELS_Q	0.6513	12.5531	2.80152e-13	AT4G14540.1	nuclear factor Y, subunit B3
358	5	33927842	Glyma.05G144900	ELT_Q	0.2834	9.5136	3.06718e-10	AT1G67660.1	Restriction endonuclease, type II-like superfamily protein
359	5	33927842	Glyma.05G145000	ELT_Q	0.2834	9.5136	3.06718e-10	AT3G13080.1	multidrug resistance-associated protein 3
360	5	33927842	Glyma.05G145100	ELT_Q	0.2834	9.5136	3.06718e-10
361	5	33927842	Glyma.05G145200	ELT_Q	0.2834	9.5136	3.06718e-10	AT3G01750.1	Ankyrin repeat family protein
362	5	33927842	Glyma.05G145300	ELT_Q	0.2834	9.5136	3.06718e-10	AT1G24400.1	lysine histidine transporter 2
363	5	33927842	Glyma.05G145400	ELT_Q	0.2834	9.5136	3.06718e-10	AT1G27850.1
364	5	33927842	Glyma.05G145500	ELT_Q	0.2834	9.5136	3.06718e-10	AT1G27880.1	DEAD/DEAH box RNA helicase family protein
365	5	33927842	Glyma.05G145600	ELT_Q	0.2834	9.5136	3.06718e-10	AT1G67600.1	Acid phosphatase/vanadium-dependent haloperoxidase-related protein
366	6	13580843	Glyma.06G163400	ELS_Q	0.1855	3.4162	0.000383662	AT1G07020.1
367	6	13580843	Glyma.06G163500	ELS_Q	0.1855	3.4162	0.000383662	AT1G01630.1	Sec14p-like phosphatidylinositol transfer family protein
368	6	13580843	Glyma.06G163600	ELS_Q	0.1855	3.4162	0.000383662	AT5G61850.1	floral meristem identity control protein LEAFY (LFY)
369	6	13580843	Glyma.06G163700	ELS_Q	0.1855	3.4162	0.000383662	AT5G61890.1	Integrase-type DNA-binding superfamily protein
370	6	13580843	Glyma.06G163800	ELS_Q	0.1855	3.4162	0.000383662	AT5G61910.4	DCD (Development and Cell Death) domain protein
371	6	13580843	Glyma.06G163900	ELS_Q	0.1855	3.4162	0.000383662	AT5G50970.1	transducin family protein / WD-40 repeat family protein
372	6	13580843	Glyma.06G164000	ELS_Q	0.1855	3.4162	0.000383662
373	6	13580843	Glyma.06G164100	ELS_Q	0.1855	3.4162	0.000383662
374	6	13580843	Glyma.06G164200	ELS_Q	0.1855	3.4162	0.000383662
375	6	14889586	Glyma.06G175800	ELT_Q	0.241	9.3092	4.91082e-10	AT4G24750.1	Rhodanese/Cell cycle control phosphatase superfamily protein
376	6	14889586	Glyma.06G175900	ELT_Q	0.241	9.3092	4.91082e-10	AT4G24740.1	FUS3-complementing gene 2
377	6	14889586	Glyma.06G176000	ELT_Q	0.241	9.3092	4.91082e-10	AT3G48270.1	cytochrome P450, family 71, subfamily A, polypeptide 26
378	6	14889586	Glyma.06G176100	ELT_Q	0.241	9.3092	4.91082e-10	AT3G48310.1	cytochrome P450, family 71, subfamily A, polypeptide 22
379	6	14889586	Glyma.06G176200	ELT_Q	0.241	9.3092	4.91082e-10	AT3G48310.1	cytochrome P450, family 71, subfamily A, polypeptide 22
380	6	14889586	Glyma.06G176300	ELT_Q	0.241	9.3092	4.91082e-10	AT1G67960.1
381	6	14889586	Glyma.06G176400	ELT_Q	0.241	9.3092	4.91082e-10	AT4G24730.2	Calcineurin-like metallo-phosphoesterase superfamily protein
382	6	14889586	Glyma.06G176500	ELT_Q	0.241	9.3092	4.91082e-10	AT4G24730.2	Calcineurin-like metallo-phosphoesterase superfamily protein
383	6	14889586	Glyma.06G176600	ELT_Q	0.241	9.3092	4.91082e-10	AT3G56320.1	PAP/OAS1 substrate-binding domain superfamily
384	6	14889586	Glyma.06G176700	ELT_Q	0.241	9.3092	4.91082e-10	AT5G48270.1	Plant protein of unknown function (DUF868)
385	6	15938325	Glyma.06G184100	ELS_QEI	1.1308	17.46	3.47262e-18	AT1G23820.1	spermidine synthase 1
386	6	15938325	Glyma.06G184200	ELS_QEI	1.1308	17.46	3.47262e-18	AT1G23870.1	trehalose-phosphatase/synthase 9
387	6	15938325	Glyma.06G184300	ELS_QEI	1.1308	17.46	3.47262e-18	AT5G62865.1
388	6	15938325	Glyma.06G184400	ELS_QEI	1.1308	17.46	3.47262e-18	AT2G26730.1	Leucine-rich repeat protein kinase family protein
389	6	15938325	Glyma.06G184500	ELS_QEI	1.1308	17.46	3.47262e-18	AT3G48040.1	RHO-related protein from plants 10
390	6	15938325	Glyma.06G184600	ELS_QEI	1.1308	17.46	3.47262e-18	AT3G48050.1	BAH domain ;TFIIS helical bundle-like domain
391	6	15938325	Glyma.06G184700	ELS_QEI	1.1308	17.46	3.47262e-18	AT5G45910.1	GDSL-like Lipase/Acylhydrolase superfamily protein
392	6	15938325	Glyma.06G184800	ELS_QEI	1.1308	17.46	3.47262e-18	AT5G62890.1	Xanthine/uracil permease family protein
393	6	15938325	Glyma.06G184900	ELS_QEI	1.1308	17.46	3.47262e-18	AT1G60010.1
394	6	15938325	Glyma.06G185000	ELS_QEI	1.1308	17.46	3.47262e-18	AT1G10200.1	GATA type zinc finger transcription factor family protein
395	6	15938325	Glyma.06G185100	ELS_QEI	1.1308	17.46	3.47262e-18	AT5G62575.2
396	6	16415040	Glyma.06G186000	ELS_QEI	0.3917	6.1333	7.3612e-07	AT5G13690.1	alpha-N-acetylglucosaminidase family / NAGLU family
397	6	16415040	Glyma.06G186100	ELS_QEI	0.3917	6.1333	7.3612e-07	AT5G13690.1	alpha-N-acetylglucosaminidase family / NAGLU family
398	6	16415040	Glyma.06G186200	ELS_QEI	0.3917	6.1333	7.3612e-07	AT1G19020.1
399	6	16415040	Glyma.06G186300	ELS_QEI	0.3917	6.1333	7.3612e-07	AT1G74920.1	aldehyde dehydrogenase 10A8
400	6	16415040	Glyma.06G186400	ELS_QEI	0.3917	6.1333	7.3612e-07	AT1G74910.1	ADP-glucose pyrophosphorylase family protein
401	6	16415040	Glyma.06G186500	ELS_QEI	0.3917	6.1333	7.3612e-07
402	6	16415040	Glyma.06G186600	ELS_QEI	0.3917	6.1333	7.3612e-07
403	6	16415040	Glyma.06G186700	ELS_QEI	0.3917	6.1333	7.3612e-07
404	6	16415040	Glyma.06G186800	ELS_QEI	0.3917	6.1333	7.3612e-07	AT3G48160.1	DP-E2F-like 1
405	6	16415040	Glyma.06G186900	ELS_QEI	0.3917	6.1333	7.3612e-07	AT3G48140.1	B12D protein
406	6	16415040	Glyma.06G187000	ELS_QEI	0.3917	6.1333	7.3612e-07	AT5G62920.1	response regulator 6
407	6	16415040	Glyma.06G187100	ELS_QEI	0.3917	6.1333	7.3612e-07	AT1G70140.1	formin 8
408	6	16415040	Glyma.06G187200	ELS_QEI	0.3917	6.1333	7.3612e-07	AT3G48080.1	alpha/beta-Hydrolases superfamily protein
409	6	16415040	Glyma.06G187300	ELS_QEI	0.3917	6.1333	7.3612e-07	AT3G48080.1	alpha/beta-Hydrolases superfamily protein
410	6	16415040	Glyma.06G187400	ELS_QEI	0.3917	6.1333	7.3612e-07	AT3G48090.1	alpha/beta-Hydrolases superfamily protein
411	6	16415040	Glyma.06G187500	ELS_QEI	0.3917	6.1333	7.3612e-07	AT5G62580.1	ARM repeat superfamily protein
412	6	16415040	Glyma.06G187600	ELS_QEI	0.3917	6.1333	7.3612e-07	AT1G74840.1	Homeodomain-like superfamily protein
413	6	16415040	Glyma.06G187700	ELS_QEI	0.3917	6.1333	7.3612e-07
414	6	16415040	Glyma.06G187800	ELS_QEI	0.3917	6.1333	7.3612e-07	AT5G11010.2	Pre-mRNA cleavage complex II protein family
415	6	16415040	Glyma.06G187900	ELS_QEI	0.3917	6.1333	7.3612e-07	AT1G74830.1	Protein of unknown function, DUF593
416	6	16415040	Glyma.06G188000	ELS_QEI	0.3917	6.1333	7.3612e-07	AT5G13050.1	5-formyltetrahydrofolate cycloligase
417	6	16415040	Glyma.06G188100	ELS_QEI	0.3917	6.1333	7.3612e-07	AT1G59640.1	BIG PETAL P
418	6	16415040	Glyma.06G188200	ELS_QEI	0.3917	6.1333	7.3612e-07
419	6	18242435	Glyma.06G198200	ELS_Q	0.5427	33.7723	1.69416e-34	AT3G53700.1	Pentatricopeptide repeat (PPR) superfamily protein
420	6	18242435	Glyma.06G198300	ELS_Q	0.5427	33.7723	1.69416e-34	AT5G16100.1
421	6	18242435	Glyma.06G198400	ELS_Q	0.5427	33.7723	1.69416e-34	AT3G52090.2	DNA-directed RNA polymerase, RBP11-like
422	6	18242435	Glyma.06G198500	ELS_Q	0.5427	33.7723	1.69416e-34
423	6	18242435	Glyma.06G198600	ELS_Q	0.5427	33.7723	1.69416e-34	AT2G03430.1	Ankyrin repeat family protein
424	6	18242435	Glyma.06G198700	ELS_Q	0.5427	33.7723	1.69416e-34	AT3G51690.1	PIF1 helicase
425	6	18242435	Glyma.06G198800	ELS_Q	0.5427	33.7723	1.69416e-34	AT5G02110.1	CYCLIN D7;1
426	6	18242435	Glyma.06G198900	ELS_Q	0.5427	33.7723	1.69416e-34	AT3G26100.2	Regulator of chromosome condensation (RCC1) family protein
427	6	18242435	Glyma.06G199000	ELS_Q	0.5427	33.7723	1.69416e-34	AT5G04440.1	Protein of unknown function (DUF1997)
428	6	18242435	Glyma.06G199100	ELS_Q	0.5427	33.7723	1.69416e-34
429	6	18242435	Glyma.06G199200	ELS_Q	0.5427	33.7723	1.69416e-34
430	6	18242435	Glyma.06G199300	ELS_Q	0.5427	33.7723	1.69416e-34
431	6	18242435	Glyma.06G199400	ELS_Q	0.5427	33.7723	1.69416e-34	AT5G02110.1	CYCLIN D7;1
432	6	18242435	Glyma.06G199500	ELS_Q	0.5427	33.7723	1.69416e-34	AT4G19040.2	ENHANCED DISEASE RESISTANCE 2
433	6	18242435	Glyma.06G199600	ELS_Q	0.5427	33.7723	1.69416e-34	AT5G61270.1	phytochrome-interacting factor7
434	6	18242435	Glyma.06G199700	ELS_Q	0.5427	33.7723	1.69416e-34	AT5G61280.1	Remorin family protein
435	6	18242435/18515902	Glyma.06G199800	ELS_Q/ELT_Q	0.5427	33.7723	1.69416e-34	AT5G07810.1	SNF2 domain-containing protein / helicase domain-containing protein / HNH endonuclease domain-containing protein
436	6	18242435/18515902	Glyma.06G199900	ELS_Q/ELT_Q	0.5427	33.7723	1.69416e-34	AT1G76750.1	Protein of unknown function (DUF1278)
437	6	18242435/18515902	Glyma.06G200000	ELS_Q/ELT_Q	0.5427	33.7723	1.69416e-34	AT5G07830.1	glucuronidase 2
438	6	18242435/18515902	Glyma.06G200100	ELS_Q/ELT_Q	0.5427	33.7723	1.69416e-34	AT5G61210.1	soluble N-ethylmaleimide-sensitive factor adaptor protein 33
439	6	18242435/18515902	Glyma.06G200200	ELS_Q/ELT_Q	0.5427	33.7723	1.69416e-34	AT4G15920.1	Nodulin MtN3 family protein
440	6	18242435/18515902	Glyma.06G200300	ELS_Q/ELT_Q	0.5427	33.7723	1.69416e-34	AT5G58430.1	exocyst subunit exo70 family protein B1
441	6	18242435/18515902	Glyma.06G200400	ELS_Q/ELT_Q	0.5427	33.7723	1.69416e-34	AT5G58430.1	exocyst subunit exo70 family protein B1
442	6	18242435/18515902	Glyma.06G200500	ELS_Q/ELT_Q	0.5427	33.7723	1.69416e-34	AT5G58430.1	exocyst subunit exo70 family protein B1
443	6	18242435/18515902	Glyma.06G200600	ELS_Q/ELT_Q	0.5427	33.7723	1.69416e-34	AT5G58430.1	exocyst subunit exo70 family protein B1
444	6	18242435/18515902	Glyma.06G200700	ELS_Q/ELT_Q	0.5427	33.7723	1.69416e-34
445	6	18242435/18515902	Glyma.06G200800	ELS_Q/ELT_Q	0.5427	33.7723	1.69416e-34	AT4G15920.1	Nodulin MtN3 family protein
446	6	18242435/18515902	Glyma.06G200900	ELS_Q/ELT_Q	0.5427	33.7723	1.69416e-34	AT5G17930.1	MIF4G domain-containing protein / MA3 domain-containing protein
447	6	18242435/18515902	Glyma.06G201000	ELS_Q/ELT_Q	0.5427	33.7723	1.69416e-34	AT5G58430.1	exocyst subunit exo70 family protein B1
448	6	18242435/18515902	Glyma.06G201100	ELS_Q/ELT_Q	0.5427	33.7723	1.69416e-34	AT1G07000.1	exocyst subunit exo70 family protein B2
449	6	18515902	Glyma.06G201200	ELT_Q	0.7717	50.8669	1.36463e-51	AT1G26610.1	C2H2-like zinc finger protein
450	6	18515902	Glyma.06G201300	ELT_Q	0.7717	50.8669	1.36463e-51	AT2G01050.1	zinc ion binding;nucleic acid binding
451	6	18515902	Glyma.06G201400	ELT_Q	0.7717	50.8669	1.36463e-51
452	6	18515902	Glyma.06G201500	ELT_Q	0.7717	50.8669	1.36463e-51	AT1G26580.1
453	6	18515902	Glyma.06G201600	ELT_Q	0.7717	50.8669	1.36463e-51	AT5G07910.1	Leucine-rich repeat (LRR) family protein
454	6	18515902	Glyma.06G201700	ELT_Q	0.7717	50.8669	1.36463e-51	AT1G32490.1	RNA helicase family protein
455	6	18515902	Glyma.06G201800	ELT_Q	0.7717	50.8669	1.36463e-51	AT5G07960.1
456	6	18515902	Glyma.06G201900	ELT_Q	0.7717	50.8669	1.36463e-51
457	6	18515902	Glyma.06G202000	ELT_Q	0.7717	50.8669	1.36463e-51	AT5G07980.1	dentin sialophosphoprotein-related
458	6	18515902	Glyma.06G202100	ELT_Q	0.7717	50.8669	1.36463e-51	AT5G61150.1	leo1-like family protein
459	6	20712215	Glyma.06G208900	ELS_QEI	0.7055	10.9807	1.04631e-11	AT1G68710.1	ATPase E1-E2 type family protein / haloacid dehalogenase-like hydrolase family protein
460	6	20712215	Glyma.06G209000	ELS_QEI	0.7055	10.9807	1.04631e-11	AT5G23090.1	nuclear factor Y, subunit B13
461	6	20712215	Glyma.06G209100	ELS_QEI	0.7055	10.9807	1.04631e-11	AT5G23100.1	Protein of unknown function, DUF617
462	6	20712215	Glyma.06G209200	ELS_QEI	0.7055	10.9807	1.04631e-11	AT1G18550.1	ATP binding microtubule motor family protein
463	6	20712215	Glyma.06G209300	ELS_QEI	0.7055	10.9807	1.04631e-11	AT1G05230.1	homeodomain GLABROUS 2
464	6	20712215	Glyma.06G209400	ELS_QEI	0.7055	10.9807	1.04631e-11	AT3G18600.1	P-loop containing nucleoside triphosphate hydrolases superfamily protein
465	6	20712215	Glyma.06G209500	ELS_QEI	0.7055	10.9807	1.04631e-11	AT3G18490.1	Eukaryotic aspartyl protease family protein
466	6	20712215	Glyma.06G209600	ELS_QEI	0.7055	10.9807	1.04631e-11	AT1G48960.1	Adenine nucleotide alpha hydrolases-like superfamily protein
467	6	20712215	Glyma.06G209700	ELS_QEI	0.7055	10.9807	1.04631e-11	AT5G38640.1	NagB/RpiA/CoA transferase-like superfamily protein
468	6	20712215	Glyma.06G209800	ELS_QEI	0.7055	10.9807	1.04631e-11	AT3G25690.1	Hydroxyproline-rich glycoprotein family protein
469	6	20712215	Glyma.06G209900	ELS_QEI	0.7055	10.9807	1.04631e-11	AT3G18570.1	Oleosin family protein
470	6	20712215	Glyma.06G210000	ELS_QEI	0.7055	10.9807	1.04631e-11	AT5G41220.1	glutathione S-transferase THETA 3
471	6	20712215	Glyma.06G210100	ELS_QEI	0.7055	10.9807	1.04631e-11	AT5G28780.1	PIF1 helicase
472	6	20712215	Glyma.06G210200	ELS_QEI	0.7055	10.9807	1.04631e-11	AT1G49000.1
473	6	20712215	Glyma.06G210300	ELS_QEI	0.7055	10.9807	1.04631e-11
474	6	20712215	Glyma.06G210400	ELS_QEI	0.7055	10.9807	1.04631e-11	AT1G03280.1	Transcription factor TFIIE, alpha subunit
475	6	20712215	Glyma.06G210500	ELS_QEI	0.7055	10.9807	1.04631e-11
476	6	20712215	Glyma.06G210600	ELS_QEI	0.7055	10.9807	1.04631e-11	AT3G18550.2	TCP family transcription factor
477	6	20712215	Glyma.06G210700	ELS_QEI	0.7055	10.9807	1.04631e-11	AT1G68310.2	Protein of unknown function (DUF59)
478	6	20712215	Glyma.06G210800	ELS_QEI	0.7055	10.9807	1.04631e-11	AT1G73930.1
479	6	20712215	Glyma.06G210900	ELS_QEI	0.7055	10.9807	1.04631e-11	AT3G24330.1	O-Glycosyl hydrolases family 17 protein
480	6	20712215	Glyma.06G211000	ELS_QEI	0.7055	10.9807	1.04631e-11	AT4G02210.1
481	6	22924855	Glyma.06G216600	ELS_QEI	27.7218	297.604	2.54994e-298	AT2G26695.1	Ran BP2/NZF zinc finger-like superfamily protein
482	6	22924855	Glyma.06G216700	ELS_QEI	27.7218	297.604	2.54994e-298	AT5G20070.1	nudix hydrolase homolog 19
483	6	22924855	Glyma.06G216800	ELS_QEI	27.7218	297.604	2.54994e-298	AT2G26830.1	Protein kinase superfamily protein
484	6	22924855	Glyma.06G216900	ELS_QEI	27.7218	297.604	2.54994e-298	AT1G69550.1	disease resistance protein (TIR-NBS-LRR class)
485	6	22924855	Glyma.06G217000	ELS_QEI	27.7218	297.604	2.54994e-298	AT3G57340.1	Heat shock protein DnaJ, N-terminal with domain of unknown function (DUF1977)
486	6	22924855	Glyma.06G217100	ELS_QEI	27.7218	297.604	2.54994e-298	AT1G52600.1	Peptidase S24/S26A/S26B/S26C family protein
487	6	22924855	Glyma.06G217200	ELS_QEI	27.7218	297.604	2.54994e-298	AT1G08750.1	Peptidase C13 family
488	6	22924855	Glyma.06G217300	ELS_QEI	27.7218	297.604	2.54994e-298	AT2G23360.1	Plant protein of unknown function (DUF869)
489	6	22924855	Glyma.06G217400	ELS_QEI	27.7218	297.604	2.54994e-298	AT2G24120.1	DNA/RNA polymerases superfamily protein
490	6	22924855	Glyma.06G217500	ELS_QEI	27.7218	297.604	2.54994e-298	AT1G15340.1	methyl-CPG-binding domain 10
491	6	22924855	Glyma.06G217600	ELS_QEI	27.7218	297.604	2.54994e-298	AT5G20200.1	nucleoporin-related
492	6	27001785	Glyma.06G221100	ELT_QEI	0.4668	6.5492	2.82505e-07	AT1G31200.1	phloem protein 2-A9
493	6	28621154	Glyma.06G221800	ELT_Q	0.5306	7.4957	3.19558e-08	AT1G15360.1	Integrase-type DNA-binding superfamily protein
494	6	28621154	Glyma.06G221900	ELT_Q	0.5306	7.4957	3.19558e-08	AT2G26670.1	Plant haem oxygenase (decyclizing) family protein
495	6	28621154	Glyma.06G222000	ELT_Q	0.5306	7.4957	3.19558e-08	AT3G47650.1	DnaJ/Hsp40 cysteine-rich domain superfamily protein
496	6	30228614	Glyma.06G224100	ELS_QEI	0.4817	7.5294	2.95687e-08	AT2G20495.1
497	6	30228614	Glyma.06G224200	ELS_QEI	0.4817	7.5294	2.95687e-08	AT4G02530.1	chloroplast thylakoid lumen protein
498	6	30228614	Glyma.06G224300	ELS_QEI	0.4817	7.5294	2.95687e-08	AT1G15340.1	methyl-CPG-binding domain 10
499	6	30228614	Glyma.06G224400	ELS_QEI	0.4817	7.5294	2.95687e-08
500	6	30228614	Glyma.06G224500	ELS_QEI	0.4817	7.5294	2.95687e-08	ATCG00350.1	Photosystem I, PsaA/PsaB protein
501	6	31607864/31720495	Glyma.06G225800	ELT_Q/ELT_QEI	0.4604	6.4673	3.41158e-07	AT2G24020.1	Uncharacterised BCR, YbaB family COG0718
502	6	31607864/31720495	Glyma.06G225900	ELT_Q/ELT_QEI	0.4604	6.4673	3.41158e-07	ATCG00170.1	DNA-directed RNA polymerase family protein
503	6	34088730	Glyma.06G226900	ELS_QEI	0.3945	6.1758	6.67418e-07	AT1G17100.1	SOUL heme-binding family protein
504	6	34088730	Glyma.06G227000	ELS_QEI	0.3945	6.1758	6.67418e-07	AT1G17100.1	SOUL heme-binding family protein
505	6	34088730	Glyma.06G227100	ELS_QEI	0.3945	6.1758	6.67418e-07
506	6	41802805	Glyma.06G246900	ELT_Q	0.4704	6.6273	2.36014e-07	AT4G38180.1	FAR1-related sequence 5
507	6	41802805	Glyma.06G247000	ELT_Q	0.4704	6.6273	2.36014e-07	AT4G38180.1	FAR1-related sequence 5
508	6	41802805	Glyma.06G247100	ELT_Q	0.4704	6.6273	2.36014e-07	AT5G54190.1	protochlorophyllide oxidoreductase A
509	6	41802805	Glyma.06G247200	ELT_Q	0.4704	6.6273	2.36014e-07	AT3G15470.1	Transducin/WD40 repeat-like superfamily protein
510	6	41802805	Glyma.06G247300	ELT_Q	0.4704	6.6273	2.36014e-07	AT4G15520.1	tRNA/rRNA methyltransferase (SpoU) family protein
511	6	41802805	Glyma.06G247400	ELT_Q	0.4704	6.6273	2.36014e-07
512	6	41802805	Glyma.06G247500	ELT_Q	0.4704	6.6273	2.36014e-07
513	6	41802805	Glyma.06G247600	ELT_Q	0.4704	6.6273	2.36014e-07	AT3G11910.1	ubiquitin-specific protease 13
514	6	41802805	Glyma.06G247700	ELT_Q	0.4704	6.6273	2.36014e-07	AT4G27435.1	Protein of unknown function (DUF1218)
515	6	41802805	Glyma.06G247800	ELT_Q	0.4704	6.6273	2.36014e-07	AT1G67580.1	Protein kinase superfamily protein
516	6	41802805	Glyma.06G247900	ELT_Q	0.4704	6.6273	2.36014e-07	AT5G02960.1	Ribosomal protein S12/S23 family protein
517	6	41802805	Glyma.06G248000	ELT_Q	0.4704	6.6273	2.36014e-07
518	6	41802805	Glyma.06G248100	ELT_Q	0.4704	6.6273	2.36014e-07	AT1G73910.1	actin-related proteins 4A
519	6	41802805	Glyma.06G248200	ELT_Q	0.4704	6.6273	2.36014e-07	AT3G24310.1	myb domain protein 305
520	6	41802805	Glyma.06G248300	ELT_Q	0.4704	6.6273	2.36014e-07	AT5G55850.1	RPM1-interacting protein 4 (RIN4) family protein
521	6	41802805	Glyma.06G248400	ELT_Q	0.4704	6.6273	2.36014e-07	AT2G14830.1	Regulator of Vps4 activity in the MVB pathway protein
522	6	41802805	Glyma.06G248500	ELT_Q	0.4704	6.6273	2.36014e-07	AT2G20875.1	epidermal patterning factor 1
523	6	41802805	Glyma.06G248600	ELT_Q	0.4704	6.6273	2.36014e-07	AT4G02210.1
524	6	41802805	Glyma.06G248700	ELT_Q	0.4704	6.6273	2.36014e-07	AT1G52900.1	Toll-Interleukin-Resistance (TIR) domain family protein
525	6	41802805	Glyma.06G248800	ELT_Q	0.4704	6.6273	2.36014e-07	AT4G27420.1	ABC-2 type transporter family protein
526	7	11466942	Glyma.07G110200	ELS_Q	0.4822	14.3347	4.63289e-15	AT5G22060.1	DNAJ homologue 2
527	7	11466942	Glyma.07G110300	ELS_Q	0.4822	14.3347	4.63289e-15	AT4G01070.1	UDP-Glycosyltransferase superfamily protein
528	7	11466942	Glyma.07G110400	ELS_Q	0.4822	14.3347	4.63289e-15	AT2G42230.1	C-CAP/cofactor C-like domain-containing protein
529	7	11466942	Glyma.07G110500	ELS_Q	0.4822	14.3347	4.63289e-15	AT4G01070.1	UDP-Glycosyltransferase superfamily protein
530	7	11466942	Glyma.07G110600	ELS_Q	0.4822	14.3347	4.63289e-15	AT3G60450.1	Phosphoglycerate mutase family protein
531	7	11466942	Glyma.07G110700	ELS_Q	0.4822	14.3347	4.63289e-15	AT3G60460.1	myb-like HTH transcriptional regulator family protein
532	7	11466942	Glyma.07G110800	ELS_Q	0.4822	14.3347	4.63289e-15
533	7	11466942	Glyma.07G110900	ELS_Q	0.4822	14.3347	4.63289e-15	AT1G11680.1	CYTOCHROME P450 51G1
534	7	11466942	Glyma.07G111000	ELS_Q	0.4822	14.3347	4.63289e-15	AT2G44930.1	Plant protein of unknown function (DUF247)
535	7	11466942	Glyma.07G111100	ELS_Q	0.4822	14.3347	4.63289e-15	AT2G44930.1	Plant protein of unknown function (DUF247)
536	7	11466942	Glyma.07G111200	ELS_Q	0.4822	14.3347	4.63289e-15
537	7	11466942	Glyma.07G111300	ELS_Q	0.4822	14.3347	4.63289e-15	AT2G44930.1	Plant protein of unknown function (DUF247)
538	7	11466942	Glyma.07G111400	ELS_Q	0.4822	14.3347	4.63289e-15	AT2G28580.1	Plant protein of unknown function (DUF247)
539	7	11466942	Glyma.07G111500	ELS_Q	0.4822	14.3347	4.63289e-15	AT2G28580.1	Plant protein of unknown function (DUF247)
540	7	11466942	Glyma.07G111600	ELS_Q	0.4822	14.3347	4.63289e-15
541	7	11466942	Glyma.07G111700	ELS_Q	0.4822	14.3347	4.63289e-15	AT5G58520.1	Protein kinase superfamily protein
542	7	11466942	Glyma.07G111800	ELS_Q	0.4822	14.3347	4.63289e-15	AT2G14210.1	AGAMOUS-like 44
543	7	11466942	Glyma.07G111900	ELS_Q	0.4822	14.3347	4.63289e-15	AT2G28580.1	Plant protein of unknown function (DUF247)
544	7	11466942	Glyma.07G112000	ELS_Q	0.4822	14.3347	4.63289e-15	AT4G05180.1	photosystem II subunit Q-2
545	7	11466942	Glyma.07G112100	ELS_Q	0.4822	14.3347	4.63289e-15	AT3G60400.1	Mitochondrial transcription termination factor family protein
546	7	11466942	Glyma.07G112200	ELS_Q	0.4822	14.3347	4.63289e-15	AT5G65290.1	LMBR1-like membrane protein
547	7	11466942	Glyma.07G112300	ELS_Q	0.4822	14.3347	4.63289e-15	AT5G65290.1	LMBR1-like membrane protein
548	7	11466942	Glyma.07G112400	ELS_Q	0.4822	14.3347	4.63289e-15	AT3G60390.1	homeobox-leucine zipper protein 3
549	7	11466942	Glyma.07G112500	ELS_Q	0.4822	14.3347	4.63289e-15	AT4G01710.1	ARP2/3 complex 16 kDa subunit (p16-Arc)
550	7	11466942	Glyma.07G112600	ELS_Q	0.4822	14.3347	4.63289e-15	AT3G60370.1	FKBP-like peptidyl-prolyl cis-trans isomerase family protein
551	7	11466942	Glyma.07G112700	ELS_Q	0.4822	14.3347	4.63289e-15	AT1G65060.1	4-coumarate:CoA ligase 3
552	7	11466942	Glyma.07G112800	ELS_Q	0.4822	14.3347	4.63289e-15	AT2G35215.1
553	7	11466942	Glyma.07G112900	ELS_Q	0.4822	14.3347	4.63289e-15	AT4G37440.1
554	7	17288036	Glyma.07G143800	ELS_Q	0.4129	10.7478	1.78898e-11	ATCG00350.1	Photosystem I, PsaA/PsaB protein
555	7	17288036	Glyma.07G143900	ELS_Q	0.4129	10.7478	1.78898e-11	AT1G74190.1	receptor like protein 15
556	7	17288036	Glyma.07G144000	ELS_Q	0.4129	10.7478	1.78898e-11	AT2G25470.1	receptor like protein 21
557	7	17288036	Glyma.07G144100	ELS_Q	0.4129	10.7478	1.78898e-11	AT1G74170.1	receptor like protein 13
558	7	17288036	Glyma.07G144200	ELS_Q	0.4129	10.7478	1.78898e-11	AT3G54110.1	plant uncoupling mitochondrial protein 1
559	7	17288036	Glyma.07G144300	ELS_Q	0.4129	10.7478	1.78898e-11	AT5G01160.1	RING/U-box superfamily protein
560	7	17288036	Glyma.07G144400	ELS_Q	0.4129	10.7478	1.78898e-11	AT2G38050.1	3-oxo-5-alpha-steroid 4-dehydrogenase family protein
561	7	17288036	Glyma.07G144500	ELS_Q	0.4129	10.7478	1.78898e-11	AT3G09100.2	mRNA capping enzyme family protein
562	7	17288036	Glyma.07G144600	ELS_Q	0.4129	10.7478	1.78898e-11	AT3G09085.1	Protein of unknown function (DUF962)
563	7	17288036	Glyma.07G144700	ELS_Q	0.4129	10.7478	1.78898e-11	AT2G38060.1	phosphate transporter 4;2
564	7	17288036	Glyma.07G144800	ELS_Q	0.4129	10.7478	1.78898e-11	AT3G09080.1	Transducin/WD40 repeat-like superfamily protein
565	7	17288036	Glyma.07G144900	ELS_Q	0.4129	10.7478	1.78898e-11	AT3G09070.1	Protein of unknown function (DUF740)
566	7	17288036	Glyma.07G145000	ELS_Q	0.4129	10.7478	1.78898e-11
567	7	17288036	Glyma.07G145100	ELS_Q	0.4129	10.7478	1.78898e-11
568	7	17288036	Glyma.07G145200	ELS_Q	0.4129	10.7478	1.78898e-11
569	7	17288036	Glyma.07G145300	ELS_Q	0.4129	10.7478	1.78898e-11	AT5G01170.1	Protein of unknown function (DUF740)
570	7	17288036	Glyma.07G145400	ELS_Q	0.4129	10.7478	1.78898e-11	AT4G24480.1	Protein kinase superfamily protein
571	7	17288036	Glyma.07G145500	ELS_Q	0.4129	10.7478	1.78898e-11
572	7	17288036	Glyma.07G145600	ELS_Q	0.4129	10.7478	1.78898e-11	AT5G04110.1	DNA GYRASE B3
573	7	17288036	Glyma.07G145700	ELS_Q	0.4129	10.7478	1.78898e-11	AT3G09060.1	Pentatricopeptide repeat (PPR) superfamily protein
574	7	17288036	Glyma.07G145800	ELS_Q	0.4129	10.7478	1.78898e-11	AT3G09050.1
575	7	17288036	Glyma.07G145900	ELS_Q	0.4129	10.7478	1.78898e-11	AT3G54140.1	peptide transporter 1
576	7	17288036	Glyma.07G146000	ELS_Q	0.4129	10.7478	1.78898e-11	AT5G01190.1	laccase 10
577	7	17288036	Glyma.07G146100	ELS_Q	0.4129	10.7478	1.78898e-11	AT4G15020.1	hAT transposon superfamily
578	7	17288036	Glyma.07G146200	ELS_Q	0.4129	10.7478	1.78898e-11	AT1G21280.1
579	7	17288036	Glyma.07G146300	ELS_Q	0.4129	10.7478	1.78898e-11	AT2G38090.1	Duplicated homeodomain-like superfamily protein
580	7	17288036	Glyma.07G146400	ELS_Q	0.4129	10.7478	1.78898e-11	AT5G01220.1	sulfoquinovosyldiacylglycerol 2
581	7	17288036	Glyma.07G146500	ELS_Q	0.4129	10.7478	1.78898e-11	AT3G09032.1
582	7	17288036	Glyma.07G146600	ELS_Q	0.4129	10.7478	1.78898e-11	AT2G38100.1	proton-dependent oligopeptide transport (POT) family protein
583	7	20724069	Glyma.07G160000	ELT_Q	0.4031	12.9307	1.1948e-14
584	7	20724069	Glyma.07G160100	ELT_Q	0.4031	12.9307	1.1948e-14
585	7	20724069	Glyma.07G160200	ELT_Q	0.4031	12.9307	1.1948e-14	AT5G02800.1	Protein kinase superfamily protein
586	7	20724069	Glyma.07G160300	ELT_Q	0.4031	12.9307	1.1948e-14	AT1G21280.1
587	7	20724069	Glyma.07G160400	ELT_Q	0.4031	12.9307	1.1948e-14	AT3G48810.1	Pentatricopeptide repeat (PPR) superfamily protein
588	7	20724069	Glyma.07G160500	ELT_Q	0.4031	12.9307	1.1948e-14	AT1G20950.1	Phosphofructokinase family protein
589	7	20724069	Glyma.07G160600	ELT_Q	0.4031	12.9307	1.1948e-14	AT3G51690.1	PIF1 helicase
590	7	20724069	Glyma.07G160700	ELT_Q	0.4031	12.9307	1.1948e-14	AT3G26300.1	cytochrome P450, family 71, subfamily B, polypeptide 34
591	7	20724069	Glyma.07G160800	ELT_Q	0.4031	12.9307	1.1948e-14	AT3G51700.1	PIF1 helicase
592	7	20724069	Glyma.07G160900	ELT_Q	0.4031	12.9307	1.1948e-14
593	7	20724069	Glyma.07G161000	ELT_Q	0.4031	12.9307	1.1948e-14	AT1G47740.1	PPPDE putative thiol peptidase family protein
594	7	22162898	Glyma.07G164400	ELT_Q	0.3207	8.8031	1.92805e-10
595	7	37241342	Glyma.07G201700	ELS_Q	0.4193	7.1261	7.48372e-08	AT5G46080.1	Protein kinase superfamily protein
596	7	37241342	Glyma.07G201800	ELS_Q	0.4193	7.1261	7.48372e-08	AT4G28500.1	NAC domain containing protein 73
597	7	37241342	Glyma.07G201900	ELS_Q	0.4193	7.1261	7.48372e-08	AT3G02400.1	SMAD/FHA domain-containing protein
598	7	37241342	Glyma.07G202000	ELS_Q	0.4193	7.1261	7.48372e-08	AT1G55850.1	cellulose synthase like E1
599	7	37241342	Glyma.07G202100	ELS_Q	0.4193	7.1261	7.48372e-08	AT5G46070.1	Guanylate-binding family protein
600	7	37241342	Glyma.07G202200	ELS_Q	0.4193	7.1261	7.48372e-08	AT2G33860.1	Transcriptional factor B3 family protein / auxin-responsive factor AUX/IAA-related
601	7	37241342	Glyma.07G202300	ELS_Q	0.4193	7.1261	7.48372e-08	AT5G06900.1	cytochrome P450, family 93, subfamily D, polypeptide 1
602	7	37241342	Glyma.07G202400	ELS_Q	0.4193	7.1261	7.48372e-08	AT5G47990.1	cytochrome P450, family 705, subfamily A, polypeptide 5
603	7	37241342	Glyma.07G202500	ELS_Q	0.4193	7.1261	7.48372e-08	AT1G09200.1	Histone superfamily protein
604	7	37241342	Glyma.07G202600	ELS_Q	0.4193	7.1261	7.48372e-08	AT3G17450.1	hAT dimerisation domain-containing protein
605	7	37241342	Glyma.07G202700	ELS_Q	0.4193	7.1261	7.48372e-08	AT1G28520.1	vascular plant one zinc finger protein
606	7	37241342	Glyma.07G202800	ELS_Q	0.4193	7.1261	7.48372e-08
607	7	37241342	Glyma.07G202900	ELS_Q	0.4193	7.1261	7.48372e-08	AT5G60860.1	RAB GTPase homolog A1F
608	7	37241342	Glyma.07G203000	ELS_Q	0.4193	7.1261	7.48372e-08	AT5G45980.1	WUSCHEL related homeobox 8
609	7	37241342	Glyma.07G203100	ELS_Q	0.4193	7.1261	7.48372e-08	AT5G45970.1	RAC-like 2
610	7	37241342	Glyma.07G203200	ELS_Q	0.4193	7.1261	7.48372e-08	AT5G45960.1	GDSL-like Lipase/Acylhydrolase superfamily protein
611	7	37241342	Glyma.07G203300	ELS_Q	0.4193	7.1261	7.48372e-08	AT4G18470.1	negative regulator of systemic acquired resistance (SNI1)
612	7	37241342	Glyma.07G203400	ELS_Q	0.4193	7.1261	7.48372e-08	AT2G34060.1	Peroxidase superfamily protein
613	7	37241342	Glyma.07G203500	ELS_Q	0.4193	7.1261	7.48372e-08	AT2G35120.1	Single hybrid motif superfamily protein
614	7	37241342	Glyma.07G203600	ELS_Q	0.4193	7.1261	7.48372e-08	AT2G34040.1	Apoptosis inhibitory protein 5 (API5)
615	7	38412332	Glyma.07G212300	ELS_Q	0.3901	6.3252	4.73166e-07	AT3G19240.1	Vacuolar import/degradation, Vid27-related protein
616	7	38412332	Glyma.07G212400	ELS_Q	0.3901	6.3252	4.73166e-07	AT4G34410.1	redox responsive transcription factor 1
617	7	38412332	Glyma.07G212500	ELS_Q	0.3901	6.3252	4.73166e-07	AT3G19260.1	LAG1 homologue 2
618	7	38412332	Glyma.07G212600	ELS_Q	0.3901	6.3252	4.73166e-07	AT5G22100.1	RNA cyclase family protein
619	7	38412332	Glyma.07G212700	ELS_Q	0.3901	6.3252	4.73166e-07	AT3G19270.1	cytochrome P450, family 707, subfamily A, polypeptide 4
620	7	38412332	Glyma.07G212800	ELS_Q	0.3901	6.3252	4.73166e-07	AT2G15620.1	nitrite reductase 1
621	7	38412332	Glyma.07G212900	ELS_Q	0.3901	6.3252	4.73166e-07	AT3G19280.1	fucosyltransferase 11
622	8	27850021	Glyma.08G262600	ELT_QEI	0.307	4.3202	8.18358e-06	AT3G02600.1	lipid phosphate phosphatase 3
623	8	27850021	Glyma.08G262700	ELT_QEI	0.307	4.3202	8.18358e-06	AT2G22400.1	S-adenosyl-L-methionine-dependent methyltransferases superfamily protein
624	8	27850021	Glyma.08G262800	ELT_QEI	0.307	4.3202	8.18358e-06	AT1G68560.1	alpha-xylosidase 1
625	8	27850021	Glyma.08G262900	ELT_QEI	0.307	4.3202	8.18358e-06	AT3G02540.1	Rad23 UV excision repair protein family
626	8	32397107	Glyma.08G266000	ELS_QEI	0.2387	3.7474	3.26508e-05	AT1G32080.1	membrane protein, putative
627	8	32397107	Glyma.08G266100	ELS_QEI	0.2387	3.7474	3.26508e-05	AT1G79620.1	Leucine-rich repeat protein kinase family protein
628	8	38509673	Glyma.08G281200	ELT_QEI	0.6007	8.4054	3.93495e-09	AT4G24660.1	homeobox protein 22
629	8	38509673	Glyma.08G281300	ELT_QEI	0.6007	8.4054	3.93495e-09	ATCG00680.1	photosystem II reaction center protein B
630	8	38509673	Glyma.08G281400	ELT_QEI	0.6007	8.4054	3.93495e-09	AT2G22475.1	GRAM domain family protein
631	8	38509673	Glyma.08G281500	ELT_QEI	0.6007	8.4054	3.93495e-09
632	8	38509673	Glyma.08G281600	ELT_QEI	0.6007	8.4054	3.93495e-09	AT4G40090.1	arabinogalactan protein 3
633	8	38509673	Glyma.08G281700	ELT_QEI	0.6007	8.4054	3.93495e-09	AT1G67900.1	Phototropic-responsive NPH3 family protein
634	8	38509673	Glyma.08G281800	ELT_QEI	0.6007	8.4054	3.93495e-09	AT1G67910.1
635	8	38509673	Glyma.08G281900	ELT_QEI	0.6007	8.4054	3.93495e-09	AT1G24590.1	DORNROSCHEN-like
636	8	38509673	Glyma.08G282000	ELT_QEI	0.6007	8.4054	3.93495e-09	AT3G26510.1	Octicosapeptide/Phox/Bem1p family protein
637	8	38509673	Glyma.08G282100	ELT_QEI	0.6007	8.4054	3.93495e-09	AT3G26570.2	phosphate transporter 2;1
638	8	38509673	Glyma.08G282200	ELT_QEI	0.6007	8.4054	3.93495e-09
639	8	38509673	Glyma.08G282300	ELT_QEI	0.6007	8.4054	3.93495e-09	AT1G70630.1	Nucleotide-diphospho-sugar transferase family protein
640	8	38509673	Glyma.08G282400	ELT_QEI	0.6007	8.4054	3.93495e-09
641	8	38509673	Glyma.08G282500	ELT_QEI	0.6007	8.4054	3.93495e-09	AT2G34440.1	AGAMOUS-like 29
642	8	39015299	Glyma.08G282800	ELS_QEI	0.7155	11.134	7.35175e-12	AT2G42490.1	Copper amine oxidase family protein
643	8	39015299	Glyma.08G282900	ELS_QEI	0.7155	11.134	7.35175e-12	AT5G40460.1
644	8	39015299	Glyma.08G283000	ELS_QEI	0.7155	11.134	7.35175e-12
645	8	39015299	Glyma.08G283100	ELS_QEI	0.7155	11.134	7.35175e-12	AT1G70570.1	anthranilate phosphoribosyltransferase, putative
646	8	39015299	Glyma.08G283200	ELS_QEI	0.7155	11.134	7.35175e-12	AT1G10710.2	poor homologous synapsis 1
647	8	39015299	Glyma.08G283300	ELS_QEI	0.7155	11.134	7.35175e-12	AT1G51940.1	protein kinase family protein / peptidoglycan-binding LysM domain-containing protein
648	8	39015299	Glyma.08G283400	ELS_QEI	0.7155	11.134	7.35175e-12	AT1G60780.1	Clathrin adaptor complexes medium subunit family protein
649	8	39015299	Glyma.08G283500	ELS_QEI	0.7155	11.134	7.35175e-12	AT1G60770.1	Tetratricopeptide repeat (TPR)-like superfamily protein
650	8	39015299	Glyma.08G283600	ELS_QEI	0.7155	11.134	7.35175e-12	AT1G10750.1	Protein of Unknown Function (DUF239)
651	8	39015299	Glyma.08G283700	ELS_QEI	0.7155	11.134	7.35175e-12	AT1G10760.1	Pyruvate phosphate dikinase, PEP/pyruvate binding domain
652	8	39015299	Glyma.08G283800	ELS_QEI	0.7155	11.134	7.35175e-12
653	8	39015299	Glyma.08G283900	ELS_QEI	0.7155	11.134	7.35175e-12	AT3G22220.1	hAT transposon superfamily
654	8	39015299	Glyma.08G284000	ELS_QEI	0.7155	11.134	7.35175e-12	AT1G12940.1	nitrate transporter2.5
655	8	39015299	Glyma.08G284100	ELS_QEI	0.7155	11.134	7.35175e-12	AT1G70530.1	cysteine-rich RLK (RECEPTOR-like protein kinase) 3
656	8	39015299	Glyma.08G284200	ELS_QEI	0.7155	11.134	7.35175e-12	AT1G70520.1	cysteine-rich RLK (RECEPTOR-like protein kinase) 2
657	9	4656671	Glyma.09G052800	ELS_QEI	1.4363	22.0523	8.88241e-23	AT3G23230.1	Integrase-type DNA-binding superfamily protein
658	9	4656671	Glyma.09G052900	ELS_QEI	1.4363	22.0523	8.88241e-23	AT3G23230.1	Integrase-type DNA-binding superfamily protein
659	9	11711245	Glyma.09G087700	ELT_Q	0.7489	10.8182	1.52123e-11	AT1G30380.1	photosystem I subunit K
660	9	11711245	Glyma.09G087800	ELT_Q	0.7489	10.8182	1.52123e-11	AT5G57830.1	Protein of unknown function, DUF593
661	9	11711245	Glyma.09G087900	ELT_Q	0.7489	10.8182	1.52123e-11	AT2G39260.1	binding;RNA binding
662	9	11711245	Glyma.09G088000	ELT_Q	0.7489	10.8182	1.52123e-11	AT4G21300.1	Tetratricopeptide repeat (TPR)-like superfamily protein
663	9	11711245	Glyma.09G088100	ELT_Q	0.7489	10.8182	1.52123e-11	AT5G22510.1	alkaline/neutral invertase
664	9	11711245	Glyma.09G088200	ELT_Q	0.7489	10.8182	1.52123e-11
665	9	11711245	Glyma.09G088300	ELT_Q	0.7489	10.8182	1.52123e-11	AT5G46410.1	SCP1-like small phosphatase 4
666	9	11711245	Glyma.09G088400	ELT_Q	0.7489	10.8182	1.52123e-11
667	9	11711245	Glyma.09G088500	ELT_Q	0.7489	10.8182	1.52123e-11	AT4G18130.1	phytochrome E
668	9	11711245	Glyma.09G088600	ELT_Q	0.7489	10.8182	1.52123e-11	AT2G28410.1
669	9	11711245	Glyma.09G088700	ELT_Q	0.7489	10.8182	1.52123e-11	AT1G29400.1	MEI2-like protein 5
670	9	11711245	Glyma.09G088800	ELT_Q	0.7489	10.8182	1.52123e-11	AT1G67050.1
671	9	11711245	Glyma.09G088900	ELT_Q	0.7489	10.8182	1.52123e-11	AT3G42170.1	BED zinc finger ;hAT family dimerisation domain
672	9	11711245	Glyma.09G089000	ELT_Q	0.7489	10.8182	1.52123e-11	AT1G29380.1	Carbohydrate-binding X8 domain superfamily protein
673	9	11711245	Glyma.09G089100	ELT_Q	0.7489	10.8182	1.52123e-11	AT4G29090.1	Ribonuclease H-like superfamily protein
674	9	11711245	Glyma.09G089200	ELT_Q	0.7489	10.8182	1.52123e-11	AT1G19290.1	Pentatricopeptide repeat (PPR) superfamily protein
675	9	11711245	Glyma.09G089300	ELT_Q	0.7489	10.8182	1.52123e-11	AT4G38180.1	FAR1-related sequence 5
676	9	11711245	Glyma.09G089400	ELT_Q	0.7489	10.8182	1.52123e-11	AT5G61330.1	rRNA processing protein-related
677	9	11711245	Glyma.09G089500	ELT_Q	0.7489	10.8182	1.52123e-11	AT1G30280.1	Chaperone DnaJ-domain superfamily protein
678	9	11711245	Glyma.09G089600	ELT_Q	0.7489	10.8182	1.52123e-11	AT2G34620.1	Mitochondrial transcription termination factor family protein
679	9	14509489	Glyma.09G095600	ELT_QEI	0.7778	10.8468	1.42424e-11	AT3G12050.1	Aha1 domain-containing protein
680	9	14509489	Glyma.09G095700	ELT_QEI	0.7778	10.8468	1.42424e-11	AT5G25220.1	KNOTTED1-like homeobox gene 3
681	9	14509489	Glyma.09G095800	ELT_QEI	0.7778	10.8468	1.42424e-11	AT5G25240.1
682	9	14509489	Glyma.09G095900	ELT_QEI	0.7778	10.8468	1.42424e-11	AT3G46920.1	Protein kinase superfamily protein with octicosapeptide/Phox/Bem1p domain
683	9	14509489	Glyma.09G096000	ELT_QEI	0.7778	10.8468	1.42424e-11	AT5G53890.1	phytosylfokine-alpha receptor 2
684	9	14509489	Glyma.09G096100	ELT_QEI	0.7778	10.8468	1.42424e-11	AT3G22190.1	IQ-domain 5
685	9	14509489	Glyma.09G096200	ELT_QEI	0.7778	10.8468	1.42424e-11	AT2G29880.1
686	9	14509489	Glyma.09G096300	ELT_QEI	0.7778	10.8468	1.42424e-11	AT2G15580.1	RING/U-box superfamily protein
687	9	22026063	Glyma.09G110200	ELT_Q	0.2874	4.8129	1.53908e-05	AT3G20330.1	PYRIMIDINE B
688	9	22026063	Glyma.09G110300	ELT_Q	0.2874	4.8129	1.53908e-05	AT3G45850.1	P-loop containing nucleoside triphosphate hydrolases superfamily protein
689	9	22026063	Glyma.09G110400	ELT_Q	0.2874	4.8129	1.53908e-05	AT5G56680.1	Class II aminoacyl-tRNA and biotin synthetases superfamily protein
690	9	22026063	Glyma.09G110500	ELT_Q	0.2874	4.8129	1.53908e-05	AT5G06740.1	Concanavalin A-like lectin protein kinase family protein
691	9	22026063	Glyma.09G110600	ELT_Q	0.2874	4.8129	1.53908e-05	AT5G47550.1	Cystatin/monellin superfamily protein
692	9	22026063	Glyma.09G110700	ELT_Q	0.2874	4.8129	1.53908e-05	AT5G06740.1	Concanavalin A-like lectin protein kinase family protein
693	9	22026063	Glyma.09G110800	ELT_Q	0.2874	4.8129	1.53908e-05	AT4G27090.1	Ribosomal protein L14
694	9	22026063	Glyma.09G110900	ELT_Q	0.2874	4.8129	1.53908e-05
695	9	22026063/22226604	Glyma.09G111000	ELT_Q	0.2874	4.8129	1.53908e-05	AT2G42070.1	nudix hydrolase homolog 23
696	9	22026063/22226604	Glyma.09G111100	ELT_Q	0.2874	4.8129	1.53908e-05	AT2G42080.1	Chaperone DnaJ-domain superfamily protein
697	9	22026063/22226604	Glyma.09G111200	ELT_Q	0.2874	4.8129	1.53908e-05	AT2G37620.1	actin 1
698	9	22026063/22226604	Glyma.09G111300	ELT_Q	0.2874	4.8129	1.53908e-05	AT5G06750.1	Protein phosphatase 2C family protein
699	9	22026063/22226604	Glyma.09G111400	ELT_Q	0.2874	4.8129	1.53908e-05	AT5G04600.1	RNA-binding (RRM/RBD/RNP motifs) family protein
700	9	22026063/22226604	Glyma.09G111500	ELT_Q	0.2874	4.8129	1.53908e-05	AT2G42110.1
701	9	22026063/22226604	Glyma.09G111600	ELT_Q	0.2874	4.8129	1.53908e-05	ATCG00790.1	ribosomal protein L16
702	9	22026063/22226604	Glyma.09G111700	ELT_Q	0.2874	4.8129	1.53908e-05	AT2G42130.4	Plastid-lipid associated protein PAP / fibrillin family protein
703	9	22026063/22226604	Glyma.09G111800	ELT_Q	0.2874	4.8129	1.53908e-05	AT3G58000.1	VQ motif-containing protein
704	9	22026063/22226604	Glyma.09G111900	ELT_Q	0.2874	4.8129	1.53908e-05	AT3G12120.1	fatty acid desaturase 2
705	9	22026063/22226604	Glyma.09G112000	ELT_Q	0.2874	4.8129	1.53908e-05	AT3G05050.1	Protein kinase superfamily protein
706	9	22026063/22226604	Glyma.09G112100	ELT_Q	0.2874	4.8129	1.53908e-05	AT5G06760.1	Late Embryogenesis Abundant 4-5
707	9	22226604	Glyma.09G112200	ELT_Q	0.1797	7.1913	6.44169e-08	AT3G12810.1	SNF2 domain-containing protein / helicase domain-containing protein
708	9	22226604	Glyma.09G112300	ELT_Q	0.1797	7.1913	6.44169e-08
709	9	22226604	Glyma.09G112400	ELT_Q	0.1797	7.1913	6.44169e-08	AT3G57990.1
710	9	28400545	Glyma.09G118900	ELS_Q/ELT_Q	0.405	6.804	1.57112e-07	AT4G21120.1	amino acid transporter 1
711	9	28400545	Glyma.09G119000	ELS_Q/ELT_Q	0.405	6.804	1.57112e-07	AT2G33100.1	cellulose synthase-like D1
712	9	28400545	Glyma.09G119100	ELS_Q/ELT_Q	0.405	6.804	1.57112e-07	AT4G15920.1	Nodulin MtN3 family protein
713	9	28400545	Glyma.09G119200	ELS_Q/ELT_Q	0.405	6.804	1.57112e-07	AT5G60620.1	glycerol-3-phosphate acyltransferase 9
714	9	28400545	Glyma.09G119300	ELS_Q/ELT_Q	0.405	6.804	1.57112e-07
715	9	28400545	Glyma.09G119400	ELS_Q/ELT_Q	0.405	6.804	1.57112e-07
716	9	28400545	Glyma.09G119500	ELS_Q/ELT_Q	0.405	6.804	1.57112e-07	AT1G22990.1	Heavy metal transport/detoxification superfamily protein
717	9	28400545	Glyma.09G119600	ELS_Q/ELT_Q	0.405	6.804	1.57112e-07	AT4G08850.1	Leucine-rich repeat receptor-like protein kinase family protein
718	9	32237056	Glyma.09G128400	ELS_Q	0.2368	4.4344	3.67922e-05	AT3G16520.3	UDP-glucosyl transferase 88A1
719	9	32237056	Glyma.09G128500	ELS_Q	0.2368	4.4344	3.67922e-05	AT4G22990.1	Major Facilitator Superfamily with SPX (SYG1/Pho81/XPR1) domain-containing protein
720	9	32237056	Glyma.09G128600	ELS_Q	0.2368	4.4344	3.67922e-05	AT3G44900.1	cation/H+ exchanger 4
721	9	32237056	Glyma.09G128700	ELS_Q	0.2368	4.4344	3.67922e-05	AT3G42170.1	BED zinc finger ;hAT family dimerisation domain
722	9	32237056	Glyma.09G128800	ELS_Q	0.2368	4.4344	3.67922e-05	AT4G11260.1	phosphatase-related
723	9	32237056	Glyma.09G128900	ELS_Q	0.2368	4.4344	3.67922e-05	AT5G53830.1	VQ motif-containing protein
724	9	32237056	Glyma.09G129000	ELS_Q	0.2368	4.4344	3.67922e-05	AT5G52840.1	NADH-ubiquinone oxidoreductase-related
725	9	32237056	Glyma.09G129100	ELS_Q	0.2368	4.4344	3.67922e-05	AT4G01250.1	WRKY family transcription factor
726	9	32237056	Glyma.09G129200	ELS_Q	0.2368	4.4344	3.67922e-05
727	9	32237056	Glyma.09G129300	ELS_Q	0.2368	4.4344	3.67922e-05	AT5G62650.1	Tic22-like family protein
728	9	32237056	Glyma.09G129400	ELS_Q	0.2368	4.4344	3.67922e-05	AT4G21190.1	Pentatricopeptide repeat (PPR) superfamily protein
729	9	32237056	Glyma.09G129500	ELS_Q	0.2368	4.4344	3.67922e-05	AT5G24060.2	Pentatricopeptide repeat (PPR) superfamily protein
730	9	32237056	Glyma.09G129600	ELS_Q	0.2368	4.4344	3.67922e-05	AT5G52800.3	DNA primases
731	9	32237056	Glyma.09G129700	ELS_Q	0.2368	4.4344	3.67922e-05	AT5G52790.1	CBS domain-containing protein with a domain of unknown function (DUF21)
732	9	32237056	Glyma.09G129800	ELS_Q	0.2368	4.4344	3.67922e-05	AT1G64700.1
733	9	32237056	Glyma.09G129900	ELS_Q	0.2368	4.4344	3.67922e-05	AT5G52790.1	CBS domain-containing protein with a domain of unknown function (DUF21)
734	9	32237056	Glyma.09G130000	ELS_Q	0.2368	4.4344	3.67922e-05	AT1G47330.1	CBS domain-containing protein with a domain of unknown function (DUF21)
735	9	32237056	Glyma.09G130100	ELS_Q	0.2368	4.4344	3.67922e-05	AT3G29830.1	F-box/RNI-like superfamily protein
736	9	37620220	Glyma.09G153200	ELS_Q	0.5618	8.9097	1.23203e-09	AT4G25370.1	Double Clp-N motif protein
737	9	37620220	Glyma.09G153300	ELS_Q	0.5618	8.9097	1.23203e-09	AT4G25370.1	Double Clp-N motif protein
738	9	37620220	Glyma.09G153400	ELS_Q	0.5618	8.9097	1.23203e-09	AT3G42170.1	BED zinc finger ;hAT family dimerisation domain
739	9	37620220	Glyma.09G153500	ELS_Q	0.5618	8.9097	1.23203e-09	AT5G51600.1	Microtubule associated protein (MAP65/ASE1) family protein
740	9	37620220	Glyma.09G153600	ELS_Q	0.5618	8.9097	1.23203e-09	AT5G62260.1	AT hook motif DNA-binding family protein
741	9	37620220	Glyma.09G153700	ELS_Q	0.5618	8.9097	1.23203e-09	AT1G62935.1
742	9	37620220	Glyma.09G153800	ELS_Q	0.5618	8.9097	1.23203e-09
743	9	37620220	Glyma.09G153900	ELS_Q	0.5618	8.9097	1.23203e-09	AT2G36530.1	Enolase
744	9	37620220	Glyma.09G154000	ELS_Q	0.5618	8.9097	1.23203e-09	AT4G35360.1	Uncharacterised conserved protein (UCP030210)
745	9	41284952	Glyma.09G187800	ELS_Q	0.3206	6.1525	7.04206e-07	AT3G24430.1	ATP binding
746	9	41284952	Glyma.09G187900	ELS_Q	0.3206	6.1525	7.04206e-07	AT4G11610.1	C2 calcium/lipid-binding plant phosphoribosyltransferase family protein
747	9	41284952	Glyma.09G188000	ELS_Q	0.3206	6.1525	7.04206e-07	AT3G24440.1	Fibronectin type III domain-containing protein
748	9	41284952	Glyma.09G188100	ELS_Q	0.3206	6.1525	7.04206e-07	AT5G19590.1	Protein of unknown function, DUF538
749	9	41284952	Glyma.09G188200	ELS_Q	0.3206	6.1525	7.04206e-07	AT3G24450.1	Heavy metal transport/detoxification superfamily protein
750	9	42166536	Glyma.09G196400	ELT_QEI	0.6162	8.6205	2.39808e-09	AT5G53390.1	O-acyltransferase (WSD1-like) family protein
751	9	42166536	Glyma.09G196500	ELT_QEI	0.6162	8.6205	2.39808e-09	AT5G08520.1	Duplicated homeodomain-like superfamily protein
752	9	42166536	Glyma.09G196600	ELT_QEI	0.6162	8.6205	2.39808e-09	AT5G65960.1	GTP binding
753	9	42166536	Glyma.09G196700	ELT_QEI	0.6162	8.6205	2.39808e-09	AT1G20823.1	RING/U-box superfamily protein
754	9	42166536	Glyma.09G196800	ELT_QEI	0.6162	8.6205	2.39808e-09	AT2G17480.1	Seven transmembrane MLO family protein
755	9	42166536	Glyma.09G196900	ELT_QEI	0.6162	8.6205	2.39808e-09	AT5G65980.1	Auxin efflux carrier family protein
756	9	42166536	Glyma.09G197000	ELT_QEI	0.6162	8.6205	2.39808e-09	AT2G17520.1	Endoribonuclease/protein kinase IRE1-like
757	9	42166536	Glyma.09G197100	ELT_QEI	0.6162	8.6205	2.39808e-09	AT3G51480.1	glutamate receptor 3.6
758	9	42166536	Glyma.09G197200	ELT_QEI	0.6162	8.6205	2.39808e-09	AT1G42540.1	glutamate receptor 3.3
759	9	44253359	Glyma.09G217000	ELS_QEI	1.7371	26.5241	2.9986e-27	AT5G45300.1	beta-amylase 2
760	9	44253359	Glyma.09G217100	ELS_QEI	1.7371	26.5241	2.9986e-27	AT1G31600.1	RNA-binding (RRM/RBD/RNP motifs) family protein
761	9	44253359	Glyma.09G217200	ELS_QEI	1.7371	26.5241	2.9986e-27	AT3G47570.1	Leucine-rich repeat protein kinase family protein
762	9	44253359	Glyma.09G217300	ELS_QEI	1.7371	26.5241	2.9986e-27	AT1G31650.1	RHO guanyl-nucleotide exchange factor 14
763	9	44253359	Glyma.09G217400	ELS_QEI	1.7371	26.5241	2.9986e-27
764	9	44253359	Glyma.09G217500	ELS_QEI	1.7371	26.5241	2.9986e-27	AT3G47570.1	Leucine-rich repeat protein kinase family protein
765	9	44253359	Glyma.09G217600	ELS_QEI	1.7371	26.5241	2.9986e-27
766	9	44253359	Glyma.09G217700	ELS_QEI	1.7371	26.5241	2.9986e-27	AT5G45310.1
767	9	44253359	Glyma.09G217800	ELS_QEI	1.7371	26.5241	2.9986e-27	AT5G45320.1
768	9	44253359	Glyma.09G217900	ELS_QEI	1.7371	26.5241	2.9986e-27	AT4G19390.1	Uncharacterised protein family (UPF0114)
769	9	44253359	Glyma.09G218000	ELS_QEI	1.7371	26.5241	2.9986e-27	AT2G35612.1
770	9	44253359	Glyma.09G218100	ELS_QEI	1.7371	26.5241	2.9986e-27	AT4G19380.1	Long-chain fatty alcohol dehydrogenase family protein
771	9	44253359	Glyma.09G218200	ELS_QEI	1.7371	26.5241	2.9986e-27
772	9	44253359	Glyma.09G218300	ELS_QEI	1.7371	26.5241	2.9986e-27	AT1G31720.1	Protein of unknown function (DUF1218)
773	9	44253359	Glyma.09G218400	ELS_QEI	1.7371	26.5241	2.9986e-27	AT5G45330.1	decapping 5-like
774	9	44253359	Glyma.09G218500	ELS_QEI	1.7371	26.5241	2.9986e-27	AT1G31730.1	Adaptin family protein
775	9	44253359	Glyma.09G218600	ELS_QEI	1.7371	26.5241	2.9986e-27	AT4G19230.1	cytochrome P450, family 707, subfamily A, polypeptide 1
776	9	44253359	Glyma.09G218700	ELS_QEI	1.7371	26.5241	2.9986e-27	AT2G16800.1	high-affinity nickel-transport family protein
777	9	44253359	Glyma.09G218800	ELS_QEI	1.7371	26.5241	2.9986e-27	AT4G34830.1	Pentatricopeptide repeat (PPR) superfamily protein
778	9	44253359	Glyma.09G218900	ELS_QEI	1.7371	26.5241	2.9986e-27	AT4G34800.1	SAUR-like auxin-responsive protein family
779	9	44253359	Glyma.09G219000	ELS_QEI	1.7371	26.5241	2.9986e-27	AT4G34770.1	SAUR-like auxin-responsive protein family
780	9	44253359	Glyma.09G219100	ELS_QEI	1.7371	26.5241	2.9986e-27	AT4G38840.1	SAUR-like auxin-responsive protein family
781	9	44253359	Glyma.09G219200	ELS_QEI	1.7371	26.5241	2.9986e-27	AT4G38840.1	SAUR-like auxin-responsive protein family
782	9	44253359	Glyma.09G219300	ELS_QEI	1.7371	26.5241	2.9986e-27	AT5G18050.1	SAUR-like auxin-responsive protein family
783	9	44253359	Glyma.09G219400	ELS_QEI	1.7371	26.5241	2.9986e-27	AT2G21200.1	SAUR-like auxin-responsive protein family
784	9	44253359	Glyma.09G219500	ELS_QEI	1.7371	26.5241	2.9986e-27	AT4G38840.1	SAUR-like auxin-responsive protein family
785	9	44253359	Glyma.09G219600	ELS_QEI	1.7371	26.5241	2.9986e-27	AT4G38840.1	SAUR-like auxin-responsive protein family
786	9	44253359	Glyma.09G219700	ELS_QEI	1.7371	26.5241	2.9986e-27	AT5G18020.1	SAUR-like auxin-responsive protein family
787	9	44253359	Glyma.09G219800	ELS_QEI	1.7371	26.5241	2.9986e-27	AT4G38840.1	SAUR-like auxin-responsive protein family
788	9	44253359	Glyma.09G219900	ELS_QEI	1.7371	26.5241	2.9986e-27	AT4G38840.1	SAUR-like auxin-responsive protein family
789	9	44253359	Glyma.09G220000	ELS_QEI	1.7371	26.5241	2.9986e-27	AT4G38840.1	SAUR-like auxin-responsive protein family
790	9	44253359	Glyma.09G220100	ELS_QEI	1.7371	26.5241	2.9986e-27	AT4G38840.1	SAUR-like auxin-responsive protein family
791	9	44253359	Glyma.09G220200	ELS_QEI	1.7371	26.5241	2.9986e-27	AT4G38840.1	SAUR-like auxin-responsive protein family
792	9	44253359	Glyma.09G220300	ELS_QEI	1.7371	26.5241	2.9986e-27	AT4G38840.1	SAUR-like auxin-responsive protein family
793	9	44253359	Glyma.09G220400	ELS_QEI	1.7371	26.5241	2.9986e-27	AT4G38840.1	SAUR-like auxin-responsive protein family
794	9	44253359	Glyma.09G220500	ELS_QEI	1.7371	26.5241	2.9986e-27	AT5G18080.1	SAUR-like auxin-responsive protein family
795	9	44253359	Glyma.09G220600	ELS_QEI	1.7371	26.5241	2.9986e-27	AT4G38840.1	SAUR-like auxin-responsive protein family
796	9	44253359	Glyma.09G220700	ELS_QEI	1.7371	26.5241	2.9986e-27	AT4G38840.1	SAUR-like auxin-responsive protein family
797	9	44253359	Glyma.09G220800	ELS_QEI	1.7371	26.5241	2.9986e-27	AT4G38840.1	SAUR-like auxin-responsive protein family
798	9	44253359	Glyma.09G220900	ELS_QEI	1.7371	26.5241	2.9986e-27	AT4G38840.1	SAUR-like auxin-responsive protein family
799	9	44253359	Glyma.09G221000	ELS_QEI	1.7371	26.5241	2.9986e-27	AT4G38840.1	SAUR-like auxin-responsive protein family
800	10	2738580	Glyma.10G031500	ELS_Q	0.5234	10.9423	1.14306e-11	AT5G43680.1
801	10	2738580	Glyma.10G031600	ELS_Q	0.5234	10.9423	1.14306e-11	AT4G02590.1	basic helix-loop-helix (bHLH) DNA-binding superfamily protein
802	10	2738580	Glyma.10G031700	ELS_Q	0.5234	10.9423	1.14306e-11	AT4G20010.1	plastid transcriptionally active 9
803	10	2738580	Glyma.10G031800	ELS_Q	0.5234	10.9423	1.14306e-11	AT5G43700.1	AUX/IAA transcriptional regulator family protein
804	10	2738580	Glyma.10G031900	ELS_Q	0.5234	10.9423	1.14306e-11	AT3G23050.1	indole-3-acetic acid 7
805	10	2738580	Glyma.10G032000	ELS_Q	0.5234	10.9423	1.14306e-11	AT3G54650.1	RNI-like superfamily protein
806	10	2738580	Glyma.10G032100	ELS_Q	0.5234	10.9423	1.14306e-11	AT3G54660.1	glutathione reductase
807	10	2738580	Glyma.10G032200	ELS_Q	0.5234	10.9423	1.14306e-11	AT2G30570.1	photosystem II reaction center W
808	10	2738580	Glyma.10G032300	ELS_Q	0.5234	10.9423	1.14306e-11
809	10	2738580	Glyma.10G032400	ELS_Q	0.5234	10.9423	1.14306e-11	AT1G06780.1	galacturonosyltransferase 6
810	10	2738580	Glyma.10G032500	ELS_Q	0.5234	10.9423	1.14306e-11	AT2G30580.1	DREB2A-interacting protein 2
811	10	2738580	Glyma.10G032600	ELS_Q	0.5234	10.9423	1.14306e-11	AT3G13710.1	prenylated RAB acceptor 1.F4
812	10	5143580	Glyma.10G055500	ELT_Q	0.5294	31.2347	5.84009e-32
813	10	5143580	Glyma.10G055600	ELT_Q	0.5294	31.2347	5.84009e-32	AT3G09870.1	SAUR-like auxin-responsive protein family
814	10	5143580	Glyma.10G055700	ELT_Q	0.5294	31.2347	5.84009e-32	AT1G19260.1	TTF-type zinc finger protein with HAT dimerisation domain
815	10	5143580	Glyma.10G055800	ELT_Q	0.5294	31.2347	5.84009e-32	AT3G09870.1	SAUR-like auxin-responsive protein family
816	10	5143580	Glyma.10G055900	ELT_Q	0.5294	31.2347	5.84009e-32	AT3G09870.1	SAUR-like auxin-responsive protein family
817	10	5143580	Glyma.10G056000	ELT_Q	0.5294	31.2347	5.84009e-32	AT3G09870.1	SAUR-like auxin-responsive protein family
818	10	5143580	Glyma.10G056100	ELT_Q	0.5294	31.2347	5.84009e-32
819	10	5143580	Glyma.10G056200	ELT_Q	0.5294	31.2347	5.84009e-32	AT3G09870.1	SAUR-like auxin-responsive protein family
820	10	5143580	Glyma.10G056300	ELT_Q	0.5294	31.2347	5.84009e-32	AT3G09870.1	SAUR-like auxin-responsive protein family
821	10	5143580	Glyma.10G056400	ELT_Q	0.5294	31.2347	5.84009e-32	AT3G09870.1	SAUR-like auxin-responsive protein family
822	10	5143580	Glyma.10G056500	ELT_Q	0.5294	31.2347	5.84009e-32	AT3G09870.1	SAUR-like auxin-responsive protein family
823	10	5143580	Glyma.10G056600	ELT_Q	0.5294	31.2347	5.84009e-32	AT3G09870.1	SAUR-like auxin-responsive protein family
824	10	5143580	Glyma.10G056700	ELT_Q	0.5294	31.2347	5.84009e-32	AT5G52970.1	thylakoid lumen 15.0 kDa protein
825	10	5143580	Glyma.10G056800	ELT_Q	0.5294	31.2347	5.84009e-32	AT3G09860.1
826	10	5143580	Glyma.10G056900	ELT_Q	0.5294	31.2347	5.84009e-32	AT4G34340.1	TBP-associated factor 8
827	10	5143580	Glyma.10G057000	ELT_Q	0.5294	31.2347	5.84009e-32	AT5G03345.1
828	10	10314952	Glyma.10G083200	ELT_Q	0.8017	12.9964	1.00954e-13	AT5G60440.1	AGAMOUS-like 62
829	10	10314952	Glyma.10G083300	ELT_Q	0.8017	12.9964	1.00954e-13	AT3G11780.1	MD-2-related lipid recognition domain-containing protein / ML domain-containing protein
830	10	10314952	Glyma.10G083400	ELT_Q	0.8017	12.9964	1.00954e-13	AT5G06470.1	Glutaredoxin family protein
831	10	10314952	Glyma.10G083500	ELT_Q	0.8017	12.9964	1.00954e-13	AT3G11760.1
832	10	10314952	Glyma.10G083600	ELT_Q	0.8017	12.9964	1.00954e-13	AT2G24960.2
833	10	10314952	Glyma.10G083700	ELT_Q	0.8017	12.9964	1.00954e-13	AT5G06440.2
834	10	10314952	Glyma.10G083800	ELT_Q	0.8017	12.9964	1.00954e-13	AT5G06410.1	DNAJ heat shock N-terminal domain-containing protein
835	10	10314952	Glyma.10G083900	ELT_Q	0.8017	12.9964	1.00954e-13	AT5G06400.1	Pentatricopeptide repeat (PPR) superfamily protein
836	10	10314952	Glyma.10G084000	ELT_Q	0.8017	12.9964	1.00954e-13	AT5G04870.1	calcium dependent protein kinase 1
837	10	10314952	Glyma.10G084100	ELT_Q	0.8017	12.9964	1.00954e-13
838	10	10314952	Glyma.10G084200	ELT_Q	0.8017	12.9964	1.00954e-13	AT2G35880.1	TPX2 (targeting protein for Xklp2) protein family
839	10	10314952	Glyma.10G084300	ELT_Q	0.8017	12.9964	1.00954e-13	AT5G26760.2
840	10	10314952	Glyma.10G084400	ELT_Q	0.8017	12.9964	1.00954e-13	AT1G70890.1	MLP-like protein 43
841	10	10314952	Glyma.10G084500	ELT_Q	0.8017	12.9964	1.00954e-13	AT5G22000.2	RING-H2 group F2A
842	10	10314952	Glyma.10G084600	ELT_Q	0.8017	12.9964	1.00954e-13	AT2G27180.1
843	10	10314952	Glyma.10G084700	ELT_Q	0.8017	12.9964	1.00954e-13	AT5G60440.1	AGAMOUS-like 62
844	10	17217158	Glyma.10G098300	ELT_Q	0.2393	5.9196	1.77869e-07	AT5G52640.1	heat shock protein 90.1
845	10	17217158	Glyma.10G098400	ELT_Q	0.2393	5.9196	1.77869e-07	AT5G38260.1	Protein kinase superfamily protein
846	10	17217158	Glyma.10G098500	ELT_Q	0.2393	5.9196	1.77869e-07	ATMG00580.1	NADH dehydrogenase subunit 4
847	10	17217158	Glyma.10G098600	ELT_Q	0.2393	5.9196	1.77869e-07	ATMG01060.1
848	10	17217158	Glyma.10G098700	ELT_Q	0.2393	5.9196	1.77869e-07
849	10	17217158	Glyma.10G098800	ELT_Q	0.2393	5.9196	1.77869e-07
850	10	17217158	Glyma.10G098900	ELT_Q	0.2393	5.9196	1.77869e-07
851	10	17217158	Glyma.10G099000	ELT_Q	0.2393	5.9196	1.77869e-07
852	10	17217158	Glyma.10G099100	ELT_Q	0.2393	5.9196	1.77869e-07	AT5G20110.1	Dynein light chain type 1 family protein
853	10	17217158	Glyma.10G099200	ELT_Q	0.2393	5.9196	1.77869e-07	AT2G41740.1	villin 2
854	10	17217158	Glyma.10G099300	ELT_Q	0.2393	5.9196	1.77869e-07	AT2G01050.1	zinc ion binding;nucleic acid binding
855	10	28985324	Glyma.10G115200	ELT_QEI	0.8258	11.5064	3.35731e-13	AT3G26310.1	cytochrome P450, family 71, subfamily B, polypeptide 35
856	10	28985324	Glyma.10G115300	ELT_QEI	0.8258	11.5064	3.35731e-13	AT3G26300.1	cytochrome P450, family 71, subfamily B, polypeptide 34
857	10	28985324	Glyma.10G115400	ELT_QEI	0.8258	11.5064	3.35731e-13	AT3G26300.1	cytochrome P450, family 71, subfamily B, polypeptide 34
858	10	28985324	Glyma.10G115500	ELT_QEI	0.8258	11.5064	3.35731e-13	AT3G26300.1	cytochrome P450, family 71, subfamily B, polypeptide 34
859	10	28985324	Glyma.10G115600	ELT_QEI	0.8258	11.5064	3.35731e-13	AT5G61000.1	Replication factor-A protein 1-related
860	10	28985324	Glyma.10G115700	ELT_QEI	0.8258	11.5064	3.35731e-13	AT3G26300.1	cytochrome P450, family 71, subfamily B, polypeptide 34
861	10	28985324	Glyma.10G115800	ELT_QEI	0.8258	11.5064	3.35731e-13	AT1G45130.1	beta-galactosidase 5
862	10	28985324	Glyma.10G115900	ELT_QEI	0.8258	11.5064	3.35731e-13	AT3G26300.1	cytochrome P450, family 71, subfamily B, polypeptide 34
863	10	28985324	Glyma.10G116000	ELT_QEI	0.8258	11.5064	3.35731e-13	AT3G26310.1	cytochrome P450, family 71, subfamily B, polypeptide 35
864	10	28985324	Glyma.10G116100	ELT_QEI	0.8258	11.5064	3.35731e-13	AT3G13235.1	ubiquitin family protein
865	10	28985324	Glyma.10G116200	ELT_QEI	0.8258	11.5064	3.35731e-13	AT1G13110.1	cytochrome P450, family 71 subfamily B, polypeptide 7
866	10	28985324	Glyma.10G116300	ELT_QEI	0.8258	11.5064	3.35731e-13
867	10	28985324	Glyma.10G116400	ELT_QEI	0.8258	11.5064	3.35731e-13	AT5G28780.1	PIF1 helicase
868	10	28985324	Glyma.10G116500	ELT_QEI	0.8258	11.5064	3.35731e-13	AT5G13610.1	Protein of unknown function (DUF155)
869	10	29771487	Glyma.10G117600	ELS_Q	0.2537	7.6467	2.95531e-09	AT5G51260.1	HAD superfamily, subfamily IIIB acid phosphatase
870	10	29771487	Glyma.10G117700	ELS_Q	0.2537	7.6467	2.95531e-09	AT3G23880.1	F-box and associated interaction domains-containing protein
871	10	29771487	Glyma.10G117800	ELS_Q	0.2537	7.6467	2.95531e-09
872	10	29771487	Glyma.10G117900	ELS_Q	0.2537	7.6467	2.95531e-09	AT2G26060.1	Transducin/WD40 repeat-like superfamily protein
873	10	29771487	Glyma.10G118000	ELS_Q	0.2537	7.6467	2.95531e-09	AT3G09510.1	Ribonuclease H-like superfamily protein
874	10	29771487	Glyma.10G118100	ELS_Q	0.2537	7.6467	2.95531e-09	AT1G50240.2	Protein kinase family protein with ARM repeat domain
875	10	29771487	Glyma.10G118200	ELS_Q	0.2537	7.6467	2.95531e-09	AT5G44280.1	RING 1A
876	10	29771487	Glyma.10G118300	ELS_Q	0.2537	7.6467	2.95531e-09	AT1G28490.1	syntaxin of plants 61
877	10	29771487	Glyma.10G118400	ELS_Q	0.2537	7.6467	2.95531e-09	AT5G61620.1	myb-like transcription factor family protein
878	10	31926817	Glyma.10G122800	ELS_Q	0.4302	9.1361	7.31595e-10
879	10	31926817	Glyma.10G122900	ELS_Q	0.4302	9.1361	7.31595e-10	AT2G13360.1	alanine:glyoxylate aminotransferase
880	10	31926817	Glyma.10G123000	ELS_Q	0.4302	9.1361	7.31595e-10	AT1G30040.1	gibberellin 2-oxidase
881	10	31926817	Glyma.10G123100	ELS_Q	0.4302	9.1361	7.31595e-10	AT2G38710.1	AMMECR1 family
882	10	31926817	Glyma.10G123200	ELS_Q	0.4302	9.1361	7.31595e-10	AT1G09760.1	U2 small nuclear ribonucleoprotein A
883	10	31926817	Glyma.10G123300	ELS_Q	0.4302	9.1361	7.31595e-10
884	10	46713309	Glyma.10G238300	ELT_Q	0.6858	9.6711	2.13411e-10	AT5G07240.1	IQ-domain 24
885	10	46713309	Glyma.10G238400	ELT_Q	0.6858	9.6711	2.13411e-10	ATCG00900.1	Ribosomal protein S7p/S5e family protein
886	10	46713309	Glyma.10G238500	ELT_Q	0.6858	9.6711	2.13411e-10	AT4G38180.1	FAR1-related sequence 5
887	10	46713309	Glyma.10G238600	ELT_Q	0.6858	9.6711	2.13411e-10	AT5G51940.1	RNA polymerase Rpb6
888	10	46713309	Glyma.10G238700	ELT_Q	0.6858	9.6711	2.13411e-10	AT3G61060.1	phloem protein 2-A13
889	10	46713309	Glyma.10G238800	ELT_Q	0.6858	9.6711	2.13411e-10	AT5G52100.1	Dihydrodipicolinate reductase, bacterial/plant
890	10	46713309	Glyma.10G238900	ELT_Q	0.6858	9.6711	2.13411e-10	AT5G52060.1	BCL-2-associated athanogene 1
891	11	3375220	Glyma.11G045400	ELT_Q	0.3054	4.7731	1.68678e-05	AT3G49690.1	myb domain protein 84
892	11	3375220	Glyma.11G045500	ELT_Q	0.3054	4.7731	1.68678e-05	AT3G59090.2
893	11	3375220	Glyma.11G045600	ELT_Q	0.3054	4.7731	1.68678e-05	AT4G37770.1	1-amino-cyclopropane-1-carboxylate synthase 8
894	11	3375220	Glyma.11G045700	ELT_Q	0.3054	4.7731	1.68678e-05	AT3G49750.1	receptor like protein 44
895	11	3375220	Glyma.11G045800	ELT_Q	0.3054	4.7731	1.68678e-05	AT4G37750.1	Integrase-type DNA-binding superfamily protein
896	11	7192537	Glyma.11G094100	ELS_Q	0.4379	12.284	5.20589e-13
897	11	7192537	Glyma.11G094200	ELS_Q	0.4379	12.284	5.20589e-13	AT2G43360.1	Radical SAM superfamily protein
898	11	7192537	Glyma.11G094300	ELS_Q	0.4379	12.284	5.20589e-13	AT4G10320.1	tRNA synthetase class I (I, L, M and V) family protein
899	11	7192537	Glyma.11G094400	ELS_Q	0.4379	12.284	5.20589e-13	AT3G49080.1	Ribosomal protein S5 domain 2-like superfamily protein
900	11	7192537	Glyma.11G094500	ELS_Q	0.4379	12.284	5.20589e-13
901	11	7192537	Glyma.11G094600	ELS_Q	0.4379	12.284	5.20589e-13	AT2G43250.1
902	11	10765780	Glyma.11G140700	ELT_QEI	1.2572	17.3762	4.21168e-18	AT5G59305.1
903	11	10765780	Glyma.11G140800	ELT_QEI	1.2572	17.3762	4.21168e-18	AT2G28790.1	Pathogenesis-related thaumatin superfamily protein
904	11	10765780	Glyma.11G140900	ELT_QEI	1.2572	17.3762	4.21168e-18	AT5G59300.1	ubiquitin carrier protein 7
905	11	10765780	Glyma.11G141000	ELT_QEI	1.2572	17.3762	4.21168e-18
906	11	10765780	Glyma.11G141100	ELT_QEI	1.2572	17.3762	4.21168e-18	AT3G46450.1	SEC14 cytosolic factor family protein / phosphoglyceride transfer family protein
907	11	10765780	Glyma.11G141200	ELT_QEI	1.2572	17.3762	4.21168e-18	AT2G28760.1	UDP-XYL synthase 6
908	11	10765780	Glyma.11G141300	ELT_QEI	1.2572	17.3762	4.21168e-18	AT3G46440.1	UDP-XYL synthase 5
909	11	10765780	Glyma.11G141400	ELT_QEI	1.2572	17.3762	4.21168e-18	AT5G59960.1
910	11	10765780	Glyma.11G141500	ELT_QEI	1.2572	17.3762	4.21168e-18	AT5G59950.5	RNA-binding (RRM/RBD/RNP motifs) family protein
911	11	11493221	Glyma.11G147700	ELS_Q	0.5208	10.309	4.91299e-11	AT5G60520.1	Late embryogenesis abundant (LEA) protein-related
912	11	11493221	Glyma.11G147800	ELS_Q	0.5208	10.309	4.91299e-11	AT5G03170.1	FASCICLIN-like arabinogalactan-protein 11
913	11	11493221	Glyma.11G147900	ELS_Q	0.5208	10.309	4.91299e-11	AT2G28470.1	beta-galactosidase 8
914	11	11493221	Glyma.11G148000	ELS_Q	0.5208	10.309	4.91299e-11	AT1G07980.1	nuclear factor Y, subunit C10
915	11	11493221	Glyma.11G148100	ELS_Q	0.5208	10.309	4.91299e-11	AT5G03170.1	FASCICLIN-like arabinogalactan-protein 11
916	11	11493221	Glyma.11G148200	ELS_Q	0.5208	10.309	4.91299e-11	AT5G03170.1	FASCICLIN-like arabinogalactan-protein 11
917	11	11493221	Glyma.11G148300	ELS_Q	0.5208	10.309	4.91299e-11	AT5G03170.1	FASCICLIN-like arabinogalactan-protein 11
918	11	11493221	Glyma.11G148400	ELS_Q	0.5208	10.309	4.91299e-11	AT5G60490.1	FASCICLIN-like arabinogalactan-protein 12
919	11	11493221	Glyma.11G148500	ELS_Q	0.5208	10.309	4.91299e-11	AT5G03170.1	FASCICLIN-like arabinogalactan-protein 11
920	11	11493221	Glyma.11G148600	ELS_Q	0.5208	10.309	4.91299e-11
921	11	11493221	Glyma.11G148700	ELS_Q	0.5208	10.309	4.91299e-11	AT5G60490.1	FASCICLIN-like arabinogalactan-protein 12
922	11	11493221	Glyma.11G148800	ELS_Q	0.5208	10.309	4.91299e-11	AT1G79150.1	binding
923	11	11493221	Glyma.11G148900	ELS_Q	0.5208	10.309	4.91299e-11	AT2G41540.1	6-phosphogluconate dehydrogenase family protein
924	11	11493221	Glyma.11G149000	ELS_Q	0.5208	10.309	4.91299e-11	AT2G05642.1	Nucleic acid-binding, OB-fold-like protein
925	11	11493221	Glyma.11G149100	ELS_Q	0.5208	10.309	4.91299e-11	AT3G63440.1	cytokinin oxidase/dehydrogenase 6
926	11	11493221	Glyma.11G149200	ELS_Q	0.5208	10.309	4.91299e-11	AT5G13460.1	IQ-domain 11
927	11	11493221	Glyma.11G149300	ELS_Q	0.5208	10.309	4.91299e-11
928	11	11493221	Glyma.11G149400	ELS_Q	0.5208	10.309	4.91299e-11	AT3G51940.1
929	11	11493221	Glyma.11G149500	ELS_Q	0.5208	10.309	4.91299e-11	AT3G08550.1	elongation defective 1 protein / ELD1 protein
930	11	11493221	Glyma.11G149600	ELS_Q	0.5208	10.309	4.91299e-11	AT4G31560.1	high chlorophyll fluorescence 153
931	11	11493221	Glyma.11G149700	ELS_Q	0.5208	10.309	4.91299e-11	AT3G08550.1	elongation defective 1 protein / ELD1 protein
932	11	11493221	Glyma.11G149800	ELS_Q	0.5208	10.309	4.91299e-11
933	11	11493221	Glyma.11G149900	ELS_Q	0.5208	10.309	4.91299e-11	AT2G41430.1	dehydration-induced protein (ERD15)
934	11	11493221	Glyma.11G150000	ELS_Q	0.5208	10.309	4.91299e-11	AT4G30880.1	Bifunctional inhibitor/lipid-transfer protein/seed storage 2S albumin superfamily protein
935	11	20427306/20508691	Glyma.11G175800	ELT_Q	1.1119	15.4716	3.38015e-16	AT2G29650.1	phosphate transporter 4;1
936	11	20427306/20508691	Glyma.11G175900	ELT_Q	1.1119	15.4716	3.38015e-16	AT5G58860.1	cytochrome P450, family 86, subfamily A, polypeptide 1
937	11	20427306/20508691	Glyma.11G176000	ELT_Q	1.1119	15.4716	3.38015e-16	AT3G47070.1
938	11	20427306/20508691	Glyma.11G176100	ELT_Q	1.1119	15.4716	3.38015e-16	AT1G07300.1	josephin protein-related
939	11	20427306/20508691	Glyma.11G176200	ELT_Q	1.1119	15.4716	3.38015e-16	AT2G29630.1	thiaminC
940	11	20508691	Glyma.11G176300	ELT_Q	0.4753	34.4863	3.27356e-35	AT2G31270.1	homolog of yeast CDT1 A
941	11	25769079	Glyma.11G186200	ELS_Q	0.3403	5.5869	2.59028e-06	AT4G31050.1	Biotin/lipoate A/B protein ligase family
942	11	25769079	Glyma.11G186300	ELS_Q	0.3403	5.5869	2.59028e-06	AT3G11490.1	rac GTPase activating protein
943	11	25769079	Glyma.11G186400	ELS_Q	0.3403	5.5869	2.59028e-06	AT5G48670.1	AGAMOUS-like 80
944	11	25769079	Glyma.11G186500	ELS_Q	0.3403	5.5869	2.59028e-06	AT5G11480.1	P-loop containing nucleoside triphosphate hydrolases superfamily protein
945	11	25769079	Glyma.11G186600	ELS_Q	0.3403	5.5869	2.59028e-06	AT5G58340.1	myb-like HTH transcriptional regulator family protein
946	11	25769079	Glyma.11G186700	ELS_Q	0.3403	5.5869	2.59028e-06	AT2G40620.1	Basic-leucine zipper (bZIP) transcription factor family protein
947	11	25769079	Glyma.11G186800	ELS_Q	0.3403	5.5869	2.59028e-06
948	11	25769079	Glyma.11G186900	ELS_Q	0.3403	5.5869	2.59028e-06	AT2G42850.1	cytochrome P450, family 718
949	11	25769079	Glyma.11G187000	ELS_Q	0.3403	5.5869	2.59028e-06	AT5G44070.1	phytochelatin synthase 1 (PCS1)
950	11	27392189	Glyma.11G197100	ELS_Q	0.6173	9.6256	2.36999e-10	AT2G35380.1	Peroxidase superfamily protein
951	11	27392189	Glyma.11G197200	ELS_Q	0.6173	9.6256	2.36999e-10	AT5G47770.1	farnesyl diphosphate synthase 1
952	11	27392189	Glyma.11G197300	ELS_Q	0.6173	9.6256	2.36999e-10	AT4G39950.1	cytochrome P450, family 79, subfamily B, polypeptide 2
953	11	27392189	Glyma.11G197400	ELS_Q	0.6173	9.6256	2.36999e-10	AT5G05260.1	cytochrome p450 79a2
954	11	27392189	Glyma.11G197500	ELS_Q	0.6173	9.6256	2.36999e-10	AT1G72520.1	PLAT/LH2 domain-containing lipoxygenase family protein
955	11	27392189	Glyma.11G197600	ELS_Q	0.6173	9.6256	2.36999e-10
956	11	27392189	Glyma.11G197700	ELS_Q	0.6173	9.6256	2.36999e-10	AT3G11210.1	SGNH hydrolase-type esterase superfamily protein
957	11	27392189	Glyma.11G197800	ELS_Q	0.6173	9.6256	2.36999e-10	AT5G05260.1	cytochrome p450 79a2
958	11	27392189	Glyma.11G197900	ELS_Q	0.6173	9.6256	2.36999e-10	AT2G30470.1	high-level expression of sugar-inducible gene 2
959	11	27392189	Glyma.11G198000	ELS_Q	0.6173	9.6256	2.36999e-10
960	11	27392189	Glyma.11G198100	ELS_Q	0.6173	9.6256	2.36999e-10
961	11	27392189	Glyma.11G198200	ELS_Q	0.6173	9.6256	2.36999e-10
962	11	27392189	Glyma.11G198300	ELS_Q	0.6173	9.6256	2.36999e-10	AT3G48990.1	AMP-dependent synthetase and ligase family protein
963	11	27392189	Glyma.11G198400	ELS_Q	0.6173	9.6256	2.36999e-10	AT5G28780.1	PIF1 helicase
964	11	27392189	Glyma.11G198500	ELS_Q	0.6173	9.6256	2.36999e-10	AT1G78380.1	glutathione S-transferase TAU 19
965	11	27392189	Glyma.11G198600	ELS_Q	0.6173	9.6256	2.36999e-10
966	11	27392189	Glyma.11G198700	ELS_Q	0.6173	9.6256	2.36999e-10
967	11	27392189	Glyma.11G198800	ELS_Q	0.6173	9.6256	2.36999e-10
968	11	27392189	Glyma.11G198900	ELS_Q	0.6173	9.6256	2.36999e-10
969	11	28616347	Glyma.11G204400	ELS_Q	0.4203	7.0957	8.02743e-08
970	11	28616347	Glyma.11G204500	ELS_Q	0.4203	7.0957	8.02743e-08	AT1G70530.1	cysteine-rich RLK (RECEPTOR-like protein kinase) 3
971	11	28616347	Glyma.11G204600	ELS_Q	0.4203	7.0957	8.02743e-08	AT4G02510.1	translocon at the outer envelope membrane of chloroplasts 159
972	11	28616347	Glyma.11G204700	ELS_Q	0.4203	7.0957	8.02743e-08	AT1G70530.1	cysteine-rich RLK (RECEPTOR-like protein kinase) 3
973	11	28616347	Glyma.11G204800	ELS_Q	0.4203	7.0957	8.02743e-08	AT1G70530.1	cysteine-rich RLK (RECEPTOR-like protein kinase) 3
974	11	28616347	Glyma.11G204900	ELS_Q	0.4203	7.0957	8.02743e-08	AT1G70520.1	cysteine-rich RLK (RECEPTOR-like protein kinase) 2
975	11	28616347	Glyma.11G205000	ELS_Q	0.4203	7.0957	8.02743e-08	AT1G09500.1	NAD(P)-binding Rossmann-fold superfamily protein
976	11	28616347	Glyma.11G205100	ELS_Q	0.4203	7.0957	8.02743e-08	AT1G66140.1	zinc finger protein 4
977	11	28616347	Glyma.11G205200	ELS_Q	0.4203	7.0957	8.02743e-08	AT1G70520.1	cysteine-rich RLK (RECEPTOR-like protein kinase) 2
978	11	28616347	Glyma.11G205300	ELS_Q	0.4203	7.0957	8.02743e-08	AT1G70520.1	cysteine-rich RLK (RECEPTOR-like protein kinase) 2
979	11	28616347	Glyma.11G205400	ELS_Q	0.4203	7.0957	8.02743e-08	AT1G70530.1	cysteine-rich RLK (RECEPTOR-like protein kinase) 3
980	11	28616347	Glyma.11G205500	ELS_Q	0.4203	7.0957	8.02743e-08	AT1G70520.1	cysteine-rich RLK (RECEPTOR-like protein kinase) 2
981	11	28616347	Glyma.11G205600	ELS_Q	0.4203	7.0957	8.02743e-08	AT1G70530.1	cysteine-rich RLK (RECEPTOR-like protein kinase) 3
982	11	31100989	Glyma.11G216600	ELS_Q/ELT_Q	0.6771	122.85	1.42612e-123	AT1G19260.1	TTF-type zinc finger protein with HAT dimerisation domain
983	11	31100989	Glyma.11G216700	ELS_Q/ELT_Q	0.6771	122.85	1.42612e-123	AT1G70780.1
984	11	31100989	Glyma.11G216800	ELS_Q/ELT_Q	0.6771	122.85	1.42612e-123	AT5G39790.1	5\'-AMP-activated protein kinase-related
985	11	31100989	Glyma.11G216900	ELS_Q/ELT_Q	0.6771	122.85	1.42612e-123	AT3G17980.1	Calcium-dependent lipid-binding (CaLB domain) family protein
986	11	31100989	Glyma.11G217000	ELS_Q/ELT_Q	0.6771	122.85	1.42612e-123	AT5G62950.1	RNA polymerase II, Rpb4, core protein
987	11	31100989	Glyma.11G217100	ELS_Q/ELT_Q	0.6771	122.85	1.42612e-123
988	11	31100989	Glyma.11G217200	ELS_Q/ELT_Q	0.6771	122.85	1.42612e-123	AT1G18210.1	Calcium-binding EF-hand family protein
989	12	1649229	Glyma.12G020400	ELS_Q	0.4005	26.0563	8.80396e-27	AT3G21090.1	ABC-2 type transporter family protein
990	12	1649229	Glyma.12G020500	ELS_Q	0.4005	26.0563	8.80396e-27	AT3G13410.1
991	12	1649229	Glyma.12G020600	ELS_Q	0.4005	26.0563	8.80396e-27	AT2G43360.1	Radical SAM superfamily protein
992	12	1649229	Glyma.12G020700	ELS_Q	0.4005	26.0563	8.80396e-27	AT4G10320.1	tRNA synthetase class I (I, L, M and V) family protein
993	12	1649229	Glyma.12G020800	ELS_Q	0.4005	26.0563	8.80396e-27	AT3G49080.1	Ribosomal protein S5 domain 2-like superfamily protein
994	12	1649229	Glyma.12G020900	ELS_Q	0.4005	26.0563	8.80396e-27
995	12	1649229	Glyma.12G021000	ELS_Q	0.4005	26.0563	8.80396e-27	AT2G43250.1
996	12	1649229	Glyma.12G021100	ELS_Q	0.4005	26.0563	8.80396e-27	AT5G08280.1	hydroxymethylbilane synthase
997	12	1649229	Glyma.12G021200	ELS_Q	0.4005	26.0563	8.80396e-27
998	12	1649229	Glyma.12G021300	ELS_Q	0.4005	26.0563	8.80396e-27	AT4G16260.1	Glycosyl hydrolase superfamily protein
999	12	1649229	Glyma.12G021400	ELS_Q	0.4005	26.0563	8.80396e-27	AT5G12430.1	Heat shock protein DnaJ with tetratricopeptide repeat
1000	12	1649229	Glyma.12G021500	ELS_Q	0.4005	26.0563	8.80396e-27	AT1G50450.1	Saccharopine dehydrogenase
1001	12	1649229	Glyma.12G021600	ELS_Q	0.4005	26.0563	8.80396e-27	AT4G23460.1	Adaptin family protein
1002	12	1649229	Glyma.12G021700	ELS_Q	0.4005	26.0563	8.80396e-27	AT1G50460.1	hexokinase-like 1
1003	12	1649229	Glyma.12G021800	ELS_Q	0.4005	26.0563	8.80396e-27	AT3G20060.1	ubiquitin-conjugating enzyme19
1004	12	1649229	Glyma.12G021900	ELS_Q	0.4005	26.0563	8.80396e-27	AT5G12400.1	DNA binding;zinc ion binding;DNA binding
1005	12	1649229	Glyma.12G022000	ELS_Q	0.4005	26.0563	8.80396e-27	AT4G33550.2	Bifunctional inhibitor/lipid-transfer protein/seed storage 2S albumin superfamily protein
1006	12	1649229	Glyma.12G022100	ELS_Q	0.4005	26.0563	8.80396e-27	AT1G50420.1	scarecrow-like 3
1007	12	1649229	Glyma.12G022200	ELS_Q	0.4005	26.0563	8.80396e-27	AT4G15080.1	DHHC-type zinc finger family protein
1008	12	1649229	Glyma.12G022300	ELS_Q	0.4005	26.0563	8.80396e-27	AT3G22200.1	Pyridoxal phosphate (PLP)-dependent transferases superfamily protein
1009	12	1649229	Glyma.12G022400	ELS_Q	0.4005	26.0563	8.80396e-27	AT3G22210.1
1010	12	1649229	Glyma.12G022500	ELS_Q	0.4005	26.0563	8.80396e-27	AT2G32240.1
1011	12	11813577	Glyma.12G115700	ELS_QEI	0.4664	7.292	6.84028e-09	AT1G27050.1	homeobox protein 54
1012	12	11813577	Glyma.12G115800	ELS_QEI	0.4664	7.292	6.84028e-09	AT1G03750.1	switch 2
1013	12	11813577	Glyma.12G115900	ELS_QEI	0.4664	7.292	6.84028e-09
1014	12	11813577	Glyma.12G116000	ELS_QEI	0.4664	7.292	6.84028e-09	AT1G03760.1	Prefoldin chaperone subunit family protein
1015	12	11813577	Glyma.12G116100	ELS_QEI	0.4664	7.292	6.84028e-09	AT2G20650.1	RING/U-box superfamily protein
1016	12	11813577	Glyma.12G116200	ELS_QEI	0.4664	7.292	6.84028e-09	AT4G28380.1	Leucine-rich repeat (LRR) family protein
1017	12	11813577	Glyma.12G116300	ELS_QEI	0.4664	7.292	6.84028e-09	AT4G28390.1	ADP/ATP carrier 3
1018	12	11813577	Glyma.12G116400	ELS_QEI	0.4664	7.292	6.84028e-09	AT2G20635.1	ATP binding;protein kinases;protein serine/threonine kinases
1019	12	11813577	Glyma.12G116500	ELS_QEI	0.4664	7.292	6.84028e-09	AT5G44280.1	RING 1A
1020	12	11813577	Glyma.12G116600	ELS_QEI	0.4664	7.292	6.84028e-09	AT1G52990.1	thioredoxin family protein
1021	12	11813577	Glyma.12G116700	ELS_QEI	0.4664	7.292	6.84028e-09	AT1G03780.2	targeting protein for XKLP2
1022	12	11813577	Glyma.12G116800	ELS_QEI	0.4664	7.292	6.84028e-09	AT4G28400.1	Protein phosphatase 2C family protein
1023	12	11813577	Glyma.12G116900	ELS_QEI	0.4664	7.292	6.84028e-09	AT1G03790.1	Zinc finger C-x8-C-x5-C-x3-H type family protein
1024	12	11813577	Glyma.12G117000	ELS_QEI	0.4664	7.292	6.84028e-09	AT5G44210.1	erf domain protein 9
1025	12	11813577	Glyma.12G117100	ELS_QEI	0.4664	7.292	6.84028e-09	AT2G20590.1	Reticulon family protein
1026	12	11813577	Glyma.12G117200	ELS_QEI	0.4664	7.292	6.84028e-09
1027	12	11813577	Glyma.12G117300	ELS_QEI	0.4664	7.292	6.84028e-09	AT2G42770.1	Peroxisomal membrane 22 kDa (Mpv17/PMP22) family protein
1028	12	11813577	Glyma.12G117400	ELS_QEI	0.4664	7.292	6.84028e-09	AT5G51740.1	Peptidase family M48 family protein
1029	12	11813577	Glyma.12G117500	ELS_QEI	0.4664	7.292	6.84028e-09	AT2G33847.2
1030	12	11813577	Glyma.12G117600	ELS_QEI	0.4664	7.292	6.84028e-09	AT2G20580.1	26S proteasome regulatory subunit S2 1A
1031	12	11813577	Glyma.12G117700	ELS_QEI	0.4664	7.292	6.84028e-09	AT2G20570.1	GBF\'s pro-rich region-interacting factor 1
1032	12	11813577	Glyma.12G117800	ELS_QEI	0.4664	7.292	6.84028e-09	AT2G20562.1
1033	12	20506794	Glyma.12G146700	ELT_Q	0.7746	10.9212	1.19998e-11	AT2G20900.2	diacylglycerol kinase 5
1034	12	20506794	Glyma.12G146800	ELT_Q	0.7746	10.9212	1.19998e-11
1035	12	20506794	Glyma.12G146900	ELT_Q	0.7746	10.9212	1.19998e-11	AT1G16480.1	Tetratricopeptide repeat (TPR)-like superfamily protein
1036	12	20506794	Glyma.12G147000	ELT_Q	0.7746	10.9212	1.19998e-11	AT5G54280.2	myosin 2
1037	12	20506794	Glyma.12G147100	ELT_Q	0.7746	10.9212	1.19998e-11	AT5G08695.1	RNA-binding (RRM/RBD/RNP motifs) family protein
1038	12	20506794	Glyma.12G147200	ELT_Q	0.7746	10.9212	1.19998e-11	AT5G35590.1	proteasome alpha subunit A1
1039	12	20506794	Glyma.12G147300	ELT_Q	0.7746	10.9212	1.19998e-11	AT5G54290.2	cytochrome c biogenesis protein family
1040	12	20506794	Glyma.12G147400	ELT_Q	0.7746	10.9212	1.19998e-11	AT5G54310.1	ARF-GAP domain 5
1041	12	20506794	Glyma.12G147500	ELT_Q	0.7746	10.9212	1.19998e-11	AT3G13677.2
1042	12	20506794	Glyma.12G147600	ELT_Q	0.7746	10.9212	1.19998e-11
1043	12	20506794	Glyma.12G147700	ELT_Q	0.7746	10.9212	1.19998e-11	AT1G11200.1	Protein of unknown function (DUF300)
1044	12	20506794	Glyma.12G147800	ELT_Q	0.7746	10.9212	1.19998e-11
1045	12	20506794	Glyma.12G147900	ELT_Q	0.7746	10.9212	1.19998e-11
1046	12	20506794	Glyma.12G148000	ELT_Q	0.7746	10.9212	1.19998e-11	AT1G37113.1
1047	12	20506794	Glyma.12G148100	ELT_Q	0.7746	10.9212	1.19998e-11	AT3G48750.1	cell division control 2
1048	12	31738718	Glyma.12G163500	ELS_Q	0.7089	11.0377	1.00789e-12	AT4G30580.1	Phospholipid/glycerol acyltransferase family protein
1049	12	31738718	Glyma.12G163600	ELS_Q	0.7089	11.0377	1.00789e-12
1050	12	31738718	Glyma.12G163700	ELS_Q	0.7089	11.0377	1.00789e-12	AT5G49810.1	methionine S-methyltransferase
1051	12	31738718	Glyma.12G163800	ELS_Q	0.7089	11.0377	1.00789e-12	AT1G59740.1	Major facilitator superfamily protein
1052	12	32957411	Glyma.12G172100	ELT_Q	0.4828	9.5372	2.90477e-10	AT2G28380.1	dsRNA-binding protein 2
1053	12	32957411	Glyma.12G172200	ELT_Q	0.4828	9.5372	2.90477e-10	AT2G28390.1	SAND family protein
1054	12	32957411	Glyma.12G172300	ELT_Q	0.4828	9.5372	2.90477e-10	AT3G45210.1	Protein of unknown function, DUF584
1055	12	32957411	Glyma.12G172400	ELT_Q	0.4828	9.5372	2.90477e-10	AT5G62950.2	RNA polymerase II, Rpb4, core protein
1056	12	32957411	Glyma.12G172500	ELT_Q	0.4828	9.5372	2.90477e-10	AT2G37170.1	plasma membrane intrinsic protein 2
1057	12	32957411	Glyma.12G172600	ELT_Q	0.4828	9.5372	2.90477e-10	AT2G28410.1
1058	12	32957411	Glyma.12G172700	ELT_Q	0.4828	9.5372	2.90477e-10	AT3G26700.1	Protein kinase superfamily protein
1059	12	32957411	Glyma.12G172800	ELT_Q	0.4828	9.5372	2.90477e-10	AT5G60640.1	PDI-like 1-4
1060	12	32957411	Glyma.12G172900	ELT_Q	0.4828	9.5372	2.90477e-10	AT2G28440.1	proline-rich family protein
1061	12	32957411	Glyma.12G173000	ELT_Q	0.4828	9.5372	2.90477e-10	AT5G27530.1	Pectin lyase-like superfamily protein
1062	12	32957411	Glyma.12G173100	ELT_Q	0.4828	9.5372	2.90477e-10
1063	12	32957411	Glyma.12G173200	ELT_Q	0.4828	9.5372	2.90477e-10	AT5G60600.1	4-hydroxy-3-methylbut-2-enyl diphosphate synthase
1064	12	32957411	Glyma.12G173300	ELT_Q	0.4828	9.5372	2.90477e-10	AT5G60580.1	RING/U-box superfamily protein
1065	12	32957411	Glyma.12G173400	ELT_Q	0.4828	9.5372	2.90477e-10	AT4G13720.1	Inosine triphosphate pyrophosphatase family protein
1066	12	32957411	Glyma.12G173500	ELT_Q	0.4828	9.5372	2.90477e-10	AT5G60570.1	Galactose oxidase/kelch repeat superfamily protein
1067	12	32957411	Glyma.12G173600	ELT_Q	0.4828	9.5372	2.90477e-10	AT3G45240.1	geminivirus rep interacting kinase 1
1068	12	32957411	Glyma.12G173700	ELT_Q	0.4828	9.5372	2.90477e-10	AT2G28470.1	beta-galactosidase 8
1069	12	32957411	Glyma.12G173800	ELT_Q	0.4828	9.5372	2.90477e-10	AT5G03170.1	FASCICLIN-like arabinogalactan-protein 11
1070	12	33186117	Glyma.12G174500	ELS_Q	0.6389	54.1878	6.5189e-55	AT3G06880.2	Transducin/WD40 repeat-like superfamily protein
1071	12	33186117	Glyma.12G174600	ELS_Q	0.6389	54.1878	6.5189e-55
1072	13	10545962	Glyma.13G032100	ELT_Q	0.4387	12.8277	1.5205e-14	AT1G11050.1	Protein kinase superfamily protein
1073	13	10545962	Glyma.13G032200	ELT_Q	0.4387	12.8277	1.5205e-14	AT3G13540.1	myb domain protein 5
1074	13	10545962	Glyma.13G032300	ELT_Q	0.4387	12.8277	1.5205e-14	AT4G19610.1	nucleotide binding;nucleic acid binding;RNA binding
1075	13	10545962	Glyma.13G032400	ELT_Q	0.4387	12.8277	1.5205e-14	AT1G21640.1	NAD kinase 2
1076	13	10545962	Glyma.13G032500	ELT_Q	0.4387	12.8277	1.5205e-14	AT1G21610.1	wound-responsive family protein
1077	13	10545962	Glyma.13G032600	ELT_Q	0.4387	12.8277	1.5205e-14	AT1G66920.1	Protein kinase superfamily protein
1078	13	10545962	Glyma.13G032700	ELT_Q	0.4387	12.8277	1.5205e-14	AT1G66910.1	Protein kinase superfamily protein
1079	13	10545962	Glyma.13G032800	ELT_Q	0.4387	12.8277	1.5205e-14	AT4G18250.1	receptor serine/threonine kinase, putative
1080	13	10545962	Glyma.13G032900	ELT_Q	0.4387	12.8277	1.5205e-14	AT1G18390.2	Protein kinase superfamily protein
1081	13	10545962	Glyma.13G033000	ELT_Q	0.4387	12.8277	1.5205e-14	AT5G38260.1	Protein kinase superfamily protein
1082	13	10545962	Glyma.13G033100	ELT_Q	0.4387	12.8277	1.5205e-14	AT4G18250.1	receptor serine/threonine kinase, putative
1083	13	10545962	Glyma.13G033200	ELT_Q	0.4387	12.8277	1.5205e-14	AT5G38260.1	Protein kinase superfamily protein
1084	13	10545962	Glyma.13G033300	ELT_Q	0.4387	12.8277	1.5205e-14	AT1G66980.1	suppressor of npr1-1 constitutive 4
1085	13	10545962	Glyma.13G033400	ELT_Q	0.4387	12.8277	1.5205e-14	AT5G38260.1	Protein kinase superfamily protein
1086	13	10545962	Glyma.13G033500	ELT_Q	0.4387	12.8277	1.5205e-14	AT5G38260.1	Protein kinase superfamily protein
1087	13	10545962	Glyma.13G033600	ELT_Q	0.4387	12.8277	1.5205e-14	AT5G51480.1	SKU5 similar 2
1088	13	10545962	Glyma.13G033700	ELT_Q	0.4387	12.8277	1.5205e-14	AT2G27120.1	DNA polymerase epsilon catalytic subunit
1089	13	10545962	Glyma.13G033800	ELT_Q	0.4387	12.8277	1.5205e-14	AT4G18250.1	receptor serine/threonine kinase, putative
1090	13	10545962	Glyma.13G033900	ELT_Q	0.4387	12.8277	1.5205e-14	AT1G66980.1	suppressor of npr1-1 constitutive 4
1091	13	10545962	Glyma.13G034000	ELT_Q	0.4387	12.8277	1.5205e-14	AT4G24050.1	NAD(P)-binding Rossmann-fold superfamily protein
1092	13	10545962	Glyma.13G034100	ELT_Q	0.4387	12.8277	1.5205e-14	AT5G20240.1	K-box region and MADS-box transcription factor family protein
1093	13	10545962	Glyma.13G034200	ELT_Q	0.4387	12.8277	1.5205e-14	AT1G77290.1	Glutathione S-transferase family protein
1094	13	10545962	Glyma.13G034300	ELT_Q	0.4387	12.8277	1.5205e-14	AT5G13930.1	Chalcone and stilbene synthase family protein
1095	13	10545962	Glyma.13G034400	ELT_Q	0.4387	12.8277	1.5205e-14	AT1G52950.1	Nucleic acid-binding, OB-fold-like protein
1096	13	12081343	Glyma.13G038300	ELS_Q	0.2028	3.1874	0.000649752	AT1G77110.1	Auxin efflux carrier family protein
1097	13	12081343	Glyma.13G038400	ELS_Q	0.2028	3.1874	0.000649752	AT1G77110.1	Auxin efflux carrier family protein
1098	13	12081343	Glyma.13G038500	ELS_Q	0.2028	3.1874	0.000649752	AT5G15310.1	myb domain protein 16
1099	13	12081343/12186726	Glyma.13G038600	ELS_Q/ELT_QEI	0.2028	3.1874	0.000649752	AT1G43800.1	Plant stearoyl-acyl-carrier-protein desaturase family protein
1100	13	12081343/12186726	Glyma.13G038700	ELS_Q/ELT_QEI	0.2028	3.1874	0.000649752	AT1G43800.1	Plant stearoyl-acyl-carrier-protein desaturase family protein
1101	13	12081343/12186726	Glyma.13G038800	ELS_Q/ELT_QEI	0.2028	3.1874	0.000649752	ATCG01130.1	Ycf1 protein
1102	13	12081343/12186726	Glyma.13G038900	ELS_Q/ELT_QEI	0.2028	3.1874	0.000649752	AT1G77220.1	Protein of unknown function (DUF300)
1103	13	12081343/12186726	Glyma.13G039000	ELS_Q/ELT_QEI	0.2028	3.1874	0.000649752	AT1G21370.1
1104	13	12081343/12186726	Glyma.13G039100	ELS_Q/ELT_QEI	0.2028	3.1874	0.000649752
1105	13	12081343/12186726	Glyma.13G039200	ELS_Q/ELT_QEI	0.2028	3.1874	0.000649752	AT1G21360.1	glycolipid transfer protein 2
1106	13	12081343/12186726	Glyma.13G039300	ELS_Q/ELT_QEI	0.2028	3.1874	0.000649752	AT2G30810.1	Gibberellin-regulated family protein
1107	13	12081343/12186726	Glyma.13G039400	ELS_Q/ELT_QEI	0.2028	3.1874	0.000649752
1108	13	12081343/12186726	Glyma.13G039500	ELS_Q/ELT_QEI	0.2028	3.1874	0.000649752
1109	13	12081343/12186726	Glyma.13G039600	ELS_Q/ELT_QEI	0.2028	3.1874	0.000649752	AT2G30810.1	Gibberellin-regulated family protein
1110	13	12081343/12186726	Glyma.13G039700	ELS_Q/ELT_QEI	0.2028	3.1874	0.000649752	AT5G48940.1	Leucine-rich repeat transmembrane protein kinase family protein
1111	13	12081343/12186726	Glyma.13G039800	ELS_Q/ELT_QEI	0.2028	3.1874	0.000649752	AT1G21326.1	VQ motif-containing protein
1112	13	12081343/12186726	Glyma.13G039900	ELS_Q/ELT_QEI	0.2028	3.1874	0.000649752	AT4G23740.1	Leucine-rich repeat protein kinase family protein
1113	13	12186726	Glyma.13G040000	ELT_QEI	1.472	20.2635	5.46054e-21	AT5G53220.1
1114	13	14933315	Glyma.13G051400	ELS_Q	0.5579	12.2916	5.11501e-13	AT5G49550.1
1115	13	14933315	Glyma.13G051500	ELS_Q	0.5579	12.2916	5.11501e-13	AT3G30380.2	alpha/beta-Hydrolases superfamily protein
1116	13	14933315	Glyma.13G051600	ELS_Q	0.5579	12.2916	5.11501e-13	AT4G39950.1	cytochrome P450, family 79, subfamily B, polypeptide 2
1117	13	14933315	Glyma.13G051700	ELS_Q	0.5579	12.2916	5.11501e-13	AT5G15780.1	Pollen Ole e 1 allergen and extensin family protein
1118	13	14933315	Glyma.13G051800	ELS_Q	0.5579	12.2916	5.11501e-13	AT1G22360.1	UDP-glucosyl transferase 85A2
1119	13	14933315	Glyma.13G051900	ELS_Q	0.5579	12.2916	5.11501e-13	AT5G15780.1	Pollen Ole e 1 allergen and extensin family protein
1120	13	14933315	Glyma.13G052000	ELS_Q	0.5579	12.2916	5.11501e-13	AT5G15790.1	RING/U-box superfamily protein
1121	13	14933315	Glyma.13G052100	ELS_Q	0.5579	12.2916	5.11501e-13	AT5G60910.1	AGAMOUS-like 8
1122	13	14933315	Glyma.13G052200	ELS_Q	0.5579	12.2916	5.11501e-13	AT1G04390.1	BTB/POZ domain-containing protein
1123	13	14933315	Glyma.13G052300	ELS_Q	0.5579	12.2916	5.11501e-13	AT1G04390.1	BTB/POZ domain-containing protein
1124	13	14933315	Glyma.13G052400	ELS_Q	0.5579	12.2916	5.11501e-13
1125	13	14933315	Glyma.13G052500	ELS_Q	0.5579	12.2916	5.11501e-13
1126	13	14933315	Glyma.13G052600	ELS_Q	0.5579	12.2916	5.11501e-13	AT1G04390.1	BTB/POZ domain-containing protein
1127	13	14933315	Glyma.13G052700	ELS_Q	0.5579	12.2916	5.11501e-13	AT3G02310.1	K-box region and MADS-box transcription factor family protein
1128	13	19737644	Glyma.13G085000	ELS_Q	0.2762	12.4664	3.42008e-13	AT1G22030.1
1129	13	19737644	Glyma.13G085100	ELS_Q	0.2762	12.4664	3.42008e-13	AT1G77920.1	bZIP transcription factor family protein
1130	13	19737644	Glyma.13G085200	ELS_Q	0.2762	12.4664	3.42008e-13
1131	13	19737644	Glyma.13G085300	ELS_Q	0.2762	12.4664	3.42008e-13	AT3G56850.1	ABA-responsive element binding protein 3
1132	13	19737644	Glyma.13G085400	ELS_Q	0.2762	12.4664	3.42008e-13	AT4G08540.1	DNA-directed RNA polymerase II protein
1133	13	19737644	Glyma.13G085500	ELS_Q	0.2762	12.4664	3.42008e-13
1134	13	19737644	Glyma.13G085600	ELS_Q	0.2762	12.4664	3.42008e-13
1135	13	19737644	Glyma.13G085700	ELS_Q	0.2762	12.4664	3.42008e-13	AT4G01950.1	glycerol-3-phosphate acyltransferase 3
1136	13	19737644	Glyma.13G085800	ELS_Q	0.2762	12.4664	3.42008e-13
1137	13	19737644	Glyma.13G085900	ELS_Q	0.2762	12.4664	3.42008e-13
1138	13	19737644	Glyma.13G086000	ELS_Q	0.2762	12.4664	3.42008e-13	AT1G22040.1	Galactose oxidase/kelch repeat superfamily protein
1139	13	19737644	Glyma.13G086100	ELS_Q	0.2762	12.4664	3.42008e-13	AT1G22110.1	structural constituent of ribosome
1140	13	29410147	Glyma.13G177900	ELT_QEI	0.6146	8.5973	2.52917e-09	AT2G33800.1	Ribosomal protein S5 family protein
1141	13	29410147	Glyma.13G178000	ELT_QEI	0.6146	8.5973	2.52917e-09	AT1G28250.1
1142	13	29410147	Glyma.13G178100	ELT_QEI	0.6146	8.5973	2.52917e-09	AT1G80930.1	MIF4G domain-containing protein / MA3 domain-containing protein
1143	13	29410147	Glyma.13G178200	ELT_QEI	0.6146	8.5973	2.52917e-09	AT1G28260.1	Telomerase activating protein Est1
1144	13	29410147	Glyma.13G178300	ELT_QEI	0.6146	8.5973	2.52917e-09	AT2G33775.1	ralf-like 19
1145	13	29410147	Glyma.13G178400	ELT_QEI	0.6146	8.5973	2.52917e-09
1146	13	29410147	Glyma.13G178500	ELT_QEI	0.6146	8.5973	2.52917e-09	AT1G28280.1	VQ motif-containing protein
1147	13	29410147	Glyma.13G178600	ELT_QEI	0.6146	8.5973	2.52917e-09	AT1G36240.1	Ribosomal protein L7Ae/L30e/S12e/Gadd45 family protein
1148	13	29410147	Glyma.13G178700	ELT_QEI	0.6146	8.5973	2.52917e-09	AT2G34700.1	Pollen Ole e 1 allergen and extensin family protein
1149	13	29410147	Glyma.13G178800	ELT_QEI	0.6146	8.5973	2.52917e-09	AT4G20970.1	basic helix-loop-helix (bHLH) DNA-binding superfamily protein
1150	13	29410147	Glyma.13G178900	ELT_QEI	0.6146	8.5973	2.52917e-09
1151	13	29410147	Glyma.13G179000	ELT_QEI	0.6146	8.5973	2.52917e-09	AT5G58950.1	Protein kinase superfamily protein
1152	13	29410147	Glyma.13G179100	ELT_QEI	0.6146	8.5973	2.52917e-09	AT5G22100.1	RNA cyclase family protein
1153	13	29410147	Glyma.13G179200	ELT_QEI	0.6146	8.5973	2.52917e-09	AT4G32480.1	Protein of unknown function (DUF506)
1154	13	29410147	Glyma.13G179300	ELT_QEI	0.6146	8.5973	2.52917e-09	AT1G28240.1	Protein of unknown function (DUF616)
1155	13	29410147	Glyma.13G179400	ELT_QEI	0.6146	8.5973	2.52917e-09	AT2G22870.1	P-loop containing nucleoside triphosphate hydrolases superfamily protein
1156	13	29410147	Glyma.13G179500	ELT_QEI	0.6146	8.5973	2.52917e-09	AT4G30930.1	Ribosomal protein L21
1157	13	29410147	Glyma.13G179600	ELT_QEI	0.6146	8.5973	2.52917e-09	AT2G33770.1	phosphate 2
1158	13	29410147	Glyma.13G179700	ELT_QEI	0.6146	8.5973	2.52917e-09	AT2G33760.1	Pentatricopeptide repeat (PPR) superfamily protein
1159	13	29410147	Glyma.13G179800	ELT_QEI	0.6146	8.5973	2.52917e-09	AT2G33793.1
1160	13	29410147	Glyma.13G179900	ELT_QEI	0.6146	8.5973	2.52917e-09	AT4G03510.1	RING membrane-anchor 1
1161	13	29410147	Glyma.13G180000	ELT_QEI	0.6146	8.5973	2.52917e-09
1162	13	29410147	Glyma.13G180100	ELT_QEI	0.6146	8.5973	2.52917e-09	AT4G04910.1	AAA-type ATPase family protein
1163	13	29410147	Glyma.13G180200	ELT_QEI	0.6146	8.5973	2.52917e-09	AT5G62020.1	heat shock transcription factor B2A
1164	13	29410147	Glyma.13G180300	ELT_QEI	0.6146	8.5973	2.52917e-09	AT4G05230.1	Ubiquitin-like superfamily protein
1165	13	29410147	Glyma.13G180400	ELT_QEI	0.6146	8.5973	2.52917e-09	AT4G04950.1	thioredoxin family protein
1166	13	29410147	Glyma.13G180500	ELT_QEI	0.6146	8.5973	2.52917e-09	AT3G05500.1	Rubber elongation factor protein (REF)
1167	13	29410147	Glyma.13G180600	ELT_QEI	0.6146	8.5973	2.52917e-09	AT1G65070.2	DNA mismatch repair protein MutS, type 2
1168	13	29410147	Glyma.13G180700	ELT_QEI	0.6146	8.5973	2.52917e-09	AT4G21720.1
1169	13	29410147	Glyma.13G180800	ELT_QEI	0.6146	8.5973	2.52917e-09	AT4G17020.3	transcription factor-related
1170	13	29410147	Glyma.13G180900	ELT_QEI	0.6146	8.5973	2.52917e-09	AT3G47160.1	RING/U-box superfamily protein
1171	13	29410147	Glyma.13G181000	ELT_QEI	0.6146	8.5973	2.52917e-09	AT4G27450.1	Aluminium induced protein with YGL and LRDR motifs
1172	13	29410147	Glyma.13G181100	ELT_QEI	0.6146	8.5973	2.52917e-09	AT2G47960.1
1173	13	29410147	Glyma.13G181200	ELT_QEI	0.6146	8.5973	2.52917e-09	AT4G04920.2	sensitive to freezing 6
1174	13	29410147	Glyma.13G181300	ELT_QEI	0.6146	8.5973	2.52917e-09
1175	13	29410147	Glyma.13G181400	ELT_QEI	0.6146	8.5973	2.52917e-09	AT3G09010.1	Protein kinase superfamily protein
1176	13	29410147	Glyma.13G181500	ELT_QEI	0.6146	8.5973	2.52917e-09	AT2G20760.1	Clathrin light chain protein
1177	13	29410147	Glyma.13G181600	ELT_QEI	0.6146	8.5973	2.52917e-09	AT5G14770.1	Tetratricopeptide repeat (TPR)-like superfamily protein
1178	13	29410147	Glyma.13G181700	ELT_QEI	0.6146	8.5973	2.52917e-09	AT4G21670.1	C-terminal domain phosphatase-like 1
1179	13	30018811	Glyma.13G184600	ELT_Q	0.2175	6.1944	6.39494e-07	AT1G67960.1
1180	13	30018811	Glyma.13G184700	ELT_Q	0.2175	6.1944	6.39494e-07	AT3G12300.1
1181	13	30018811	Glyma.13G184800	ELT_Q	0.2175	6.1944	6.39494e-07	AT3G14460.1	LRR and NB-ARC domains-containing disease resistance protein
1182	13	30018811	Glyma.13G184900	ELT_Q	0.2175	6.1944	6.39494e-07	AT3G14470.1	NB-ARC domain-containing disease resistance protein
1183	13	30018811	Glyma.13G185000	ELT_Q	0.2175	6.1944	6.39494e-07	AT1G61240.1	Protein of unknown function (DUF707)
1184	13	30018811	Glyma.13G185100	ELT_Q	0.2175	6.1944	6.39494e-07	AT1G61250.1	secretory carrier 3
1185	13	30018811	Glyma.13G185200	ELT_Q	0.2175	6.1944	6.39494e-07	AT5G54390.1	HAL2-like
1186	13	30018811	Glyma.13G185300	ELT_Q	0.2175	6.1944	6.39494e-07	AT5G04990.1	SAD1/UNC-84 domain protein 1
1187	13	30018811	Glyma.13G185400	ELT_Q	0.2175	6.1944	6.39494e-07
1188	13	30018811	Glyma.13G185500	ELT_Q	0.2175	6.1944	6.39494e-07	AT5G04980.2	DNAse I-like superfamily protein
1189	13	30018811	Glyma.13G185600	ELT_Q	0.2175	6.1944	6.39494e-07
1190	13	30018811	Glyma.13G185700	ELT_Q	0.2175	6.1944	6.39494e-07
1191	13	30018811	Glyma.13G185800	ELT_Q	0.2175	6.1944	6.39494e-07
1192	13	30018811	Glyma.13G185900	ELT_Q	0.2175	6.1944	6.39494e-07
1193	13	30018811	Glyma.13G186000	ELT_Q	0.2175	6.1944	6.39494e-07	AT3G10720.2	Plant invertase/pectin methylesterase inhibitor superfamily
1194	13	30018811	Glyma.13G186100	ELT_Q	0.2175	6.1944	6.39494e-07	AT3G10710.1	root hair specific 12
1195	13	30018811	Glyma.13G186200	ELT_Q	0.2175	6.1944	6.39494e-07	AT1G76690.1	12-oxophytodienoate reductase 2
1196	13	30018811	Glyma.13G186300	ELT_Q	0.2175	6.1944	6.39494e-07	AT4G25330.1
1197	13	30018811	Glyma.13G186400	ELT_Q	0.2175	6.1944	6.39494e-07	AT5G13750.1	zinc induced facilitator-like 1
1198	13	30018811	Glyma.13G186500	ELT_Q	0.2175	6.1944	6.39494e-07	AT5G13750.1	zinc induced facilitator-like 1
1199	13	30018811	Glyma.13G186600	ELT_Q	0.2175	6.1944	6.39494e-07	AT5G13750.1	zinc induced facilitator-like 1
1200	13	30018811	Glyma.13G186700	ELT_Q	0.2175	6.1944	6.39494e-07	AT5G13750.1	zinc induced facilitator-like 1
1201	13	30018811	Glyma.13G186800	ELT_Q	0.2175	6.1944	6.39494e-07	AT1G73100.1	SU(VAR)3-9 homolog 3
1202	13	30018811	Glyma.13G186900	ELT_Q	0.2175	6.1944	6.39494e-07
1203	13	30018811	Glyma.13G187000	ELT_Q	0.2175	6.1944	6.39494e-07	AT1G20160.1	Subtilisin-like serine endopeptidase family protein
1204	13	30018811	Glyma.13G187100	ELT_Q	0.2175	6.1944	6.39494e-07	AT1G02100.1	Leucine carboxyl methyltransferase
1205	13	30018811	Glyma.13G187200	ELT_Q	0.2175	6.1944	6.39494e-07	AT1G02090.1	Proteasome component (PCI) domain protein
1206	13	30018811	Glyma.13G187300	ELT_Q	0.2175	6.1944	6.39494e-07	AT2G44850.2
1207	13	30018811	Glyma.13G187400	ELT_Q	0.2175	6.1944	6.39494e-07
1208	13	30018811	Glyma.13G187500	ELT_Q	0.2175	6.1944	6.39494e-07	AT5G06100.2	myb domain protein 33
1209	13	30018811	Glyma.13G187600	ELT_Q	0.2175	6.1944	6.39494e-07	AT1G55200.1	Protein kinase protein with adenine nucleotide alpha hydrolases-like domain
1210	13	30018811	Glyma.13G187700	ELT_Q	0.2175	6.1944	6.39494e-07
1211	13	30018811	Glyma.13G187800	ELT_Q	0.2175	6.1944	6.39494e-07	AT3G54380.1	SAC3/GANP/Nin1/mts3/eIF-3 p25 family
1212	13	30018811	Glyma.13G187900	ELT_Q	0.2175	6.1944	6.39494e-07	AT3G14470.1	NB-ARC domain-containing disease resistance protein
1213	13	30018811	Glyma.13G188000	ELT_Q	0.2175	6.1944	6.39494e-07	AT3G12300.1
1214	13	30018811	Glyma.13G188100	ELT_Q	0.2175	6.1944	6.39494e-07
1215	13	30018811	Glyma.13G188200	ELT_Q	0.2175	6.1944	6.39494e-07
1216	13	30018811	Glyma.13G188300	ELT_Q	0.2175	6.1944	6.39494e-07	AT3G14470.1	NB-ARC domain-containing disease resistance protein
1217	13	30018811	Glyma.13G188400	ELT_Q	0.2175	6.1944	6.39494e-07	AT3G12300.1
1218	13	30018811	Glyma.13G188500	ELT_Q	0.2175	6.1944	6.39494e-07
1219	13	30018811	Glyma.13G188600	ELT_Q	0.2175	6.1944	6.39494e-07
1220	13	30018811	Glyma.13G188700	ELT_Q	0.2175	6.1944	6.39494e-07
1221	13	30018811	Glyma.13G188800	ELT_Q	0.2175	6.1944	6.39494e-07	AT4G23150.1	cysteine-rich RLK (RECEPTOR-like protein kinase) 7
1222	13	30690708	Glyma.13G193200	ELS_Q	0.2405	3.8448	0.000143004	AT2G32940.1	Argonaute family protein
1223	13	30690708	Glyma.13G193300	ELS_Q	0.2405	3.8448	0.000143004	AT3G14470.1	NB-ARC domain-containing disease resistance protein
1224	13	30690708	Glyma.13G193400	ELS_Q	0.2405	3.8448	0.000143004
1225	13	30690708	Glyma.13G193500	ELS_Q	0.2405	3.8448	0.000143004	AT2G38730.1	Cyclophilin-like peptidyl-prolyl cis-trans isomerase family protein
1226	13	30690708	Glyma.13G193600	ELS_Q	0.2405	3.8448	0.000143004	AT3G12260.1	LYR family of Fe/S cluster biogenesis protein
1227	13	30690708	Glyma.13G193700	ELS_Q	0.2405	3.8448	0.000143004	AT3G12250.1	TGACG motif-binding factor 6
1228	13	30690708	Glyma.13G193800	ELS_Q	0.2405	3.8448	0.000143004	AT3G56710.1	sigma factor binding protein 1
1229	13	30690708	Glyma.13G193900	ELS_Q	0.2405	3.8448	0.000143004	AT4G36040.1	Chaperone DnaJ-domain superfamily protein
1230	13	30690708	Glyma.13G194000	ELS_Q	0.2405	3.8448	0.000143004	AT3G01800.1	Ribosome recycling factor
1231	13	30690708	Glyma.13G194100	ELS_Q	0.2405	3.8448	0.000143004	AT3G14470.1	NB-ARC domain-containing disease resistance protein
1232	13	30690708	Glyma.13G194200	ELS_Q	0.2405	3.8448	0.000143004
1233	13	30690708	Glyma.13G194300	ELS_Q	0.2405	3.8448	0.000143004
1234	13	30690708	Glyma.13G194400	ELS_Q	0.2405	3.8448	0.000143004
1235	13	30690708	Glyma.13G194500	ELS_Q	0.2405	3.8448	0.000143004	AT3G14470.1	NB-ARC domain-containing disease resistance protein
1236	13	30690708	Glyma.13G194600	ELS_Q	0.2405	3.8448	0.000143004	AT4G14370.1	Disease resistance protein (TIR-NBS-LRR class) family
1237	13	30690708	Glyma.13G194700	ELS_Q	0.2405	3.8448	0.000143004	AT5G17680.1	disease resistance protein (TIR-NBS-LRR class), putative
1238	13	30690708	Glyma.13G194800	ELS_Q	0.2405	3.8448	0.000143004	AT1G64070.1	Disease resistance protein (TIR-NBS-LRR class) family
1239	13	30690708	Glyma.13G194900	ELS_Q	0.2405	3.8448	0.000143004	AT5G36930.2	Disease resistance protein (TIR-NBS-LRR class) family
1240	13	30690708	Glyma.13G195000	ELS_Q	0.2405	3.8448	0.000143004
1241	13	30690708	Glyma.13G195100	ELS_Q	0.2405	3.8448	0.000143004	AT5G17680.1	disease resistance protein (TIR-NBS-LRR class), putative
1242	13	30690708	Glyma.13G195200	ELS_Q	0.2405	3.8448	0.000143004	AT5G13530.1	protein kinases;ubiquitin-protein ligases
1243	13	30690708	Glyma.13G195300	ELS_Q	0.2405	3.8448	0.000143004	AT3G12600.1	nudix hydrolase homolog 16
1244	13	30690708	Glyma.13G195400	ELS_Q	0.2405	3.8448	0.000143004
1245	13	30690708	Glyma.13G195500	ELS_Q	0.2405	3.8448	0.000143004
1246	13	30690708	Glyma.13G195600	ELS_Q	0.2405	3.8448	0.000143004	AT3G14460.1	LRR and NB-ARC domains-containing disease resistance protein
1247	13	31895584	Glyma.13G204100	ELS_Q	0.1848	4.7696	1.7004e-05	AT3G12630.1	A20/AN1-like zinc finger family protein
1248	13	31895584	Glyma.13G204200	ELS_Q	0.1848	4.7696	1.7004e-05	AT3G52115.1	gamma response gene 1
1249	13	31895584	Glyma.13G204300	ELS_Q	0.1848	4.7696	1.7004e-05	AT3G12610.1	Leucine-rich repeat (LRR) family protein
1250	13	31895584	Glyma.13G204400	ELS_Q	0.1848	4.7696	1.7004e-05	AT2G42280.1	basic helix-loop-helix (bHLH) DNA-binding superfamily protein
1251	13	31895584	Glyma.13G204500	ELS_Q	0.1848	4.7696	1.7004e-05
1252	13	31895584	Glyma.13G204600	ELS_Q	0.1848	4.7696	1.7004e-05	AT4G21970.1	Protein of unknown function, DUF584
1253	13	31895584	Glyma.13G204700	ELS_Q	0.1848	4.7696	1.7004e-05	AT1G11720.2	starch synthase 3
1254	13	31895584	Glyma.13G204800	ELS_Q	0.1848	4.7696	1.7004e-05	AT4G04640.1	ATPase, F1 complex, gamma subunit protein
1255	13	33425940	Glyma.13G219900	ELT_QEI	0.7219	10.0784	8.3555e-11	AT4G18390.1	TEOSINTE BRANCHED 1, cycloidea and PCF transcription factor 2
1256	13	33425940	Glyma.13G220000	ELT_QEI	0.7219	10.0784	8.3555e-11	AT2G34660.1	multidrug resistance-associated protein 2
1257	13	33425940	Glyma.13G220100	ELT_QEI	0.7219	10.0784	8.3555e-11	AT2G34650.1	Protein kinase superfamily protein
1258	13	33425940	Glyma.13G220200	ELT_QEI	0.7219	10.0784	8.3555e-11	AT4G05460.1	RNI-like superfamily protein
1259	13	33425940	Glyma.13G220300	ELT_QEI	0.7219	10.0784	8.3555e-11	AT4G03620.1	myosin heavy chain-related
1260	13	33425940	Glyma.13G220400	ELT_QEI	0.7219	10.0784	8.3555e-11	AT4G21070.1	breast cancer susceptibility1
1261	13	33425940	Glyma.13G220500	ELT_QEI	0.7219	10.0784	8.3555e-11	AT5G62100.2	BCL-2-associated athanogene 2
1262	13	33425940	Glyma.13G220600	ELT_QEI	0.7219	10.0784	8.3555e-11	AT1G73240.1
1263	13	33425940	Glyma.13G220700	ELT_QEI	0.7219	10.0784	8.3555e-11
1264	13	33425940	Glyma.13G220800	ELT_QEI	0.7219	10.0784	8.3555e-11	AT3G25210.1	Tetratricopeptide repeat (TPR)-like superfamily protein
1265	13	33425940	Glyma.13G220900	ELT_QEI	0.7219	10.0784	8.3555e-11	AT1G30360.1	Early-responsive to dehydration stress protein (ERD4)
1266	13	33425940	Glyma.13G221000	ELT_QEI	0.7219	10.0784	8.3555e-11	AT4G21060.2	Galactosyltransferase family protein
1267	13	33425940	Glyma.13G221100	ELT_QEI	0.7219	10.0784	8.3555e-11	AT5G42300.1	ubiquitin-like protein 5
1268	13	33425940	Glyma.13G221200	ELT_QEI	0.7219	10.0784	8.3555e-11	AT5G03250.1	Phototropic-responsive NPH3 family protein
1269	13	33425940	Glyma.13G221300	ELT_QEI	0.7219	10.0784	8.3555e-11	AT2G34640.1	plastid transcriptionally active 12
1270	13	33425940	Glyma.13G221400	ELT_QEI	0.7219	10.0784	8.3555e-11	AT5G37020.1	auxin response factor 8
1271	13	36309278	Glyma.13G257200	ELT_Q	0.1606	6.3723	4.24514e-07	AT4G33580.1	beta carbonic anhydrase 5
1272	13	36309278	Glyma.13G257300	ELT_Q	0.1606	6.3723	4.24514e-07
1273	13	36309278	Glyma.13G257400	ELT_Q	0.1606	6.3723	4.24514e-07
1274	13	36309278	Glyma.13G257500	ELT_Q	0.1606	6.3723	4.24514e-07
1275	13	36309278	Glyma.13G257600	ELT_Q	0.1606	6.3723	4.24514e-07	AT4G38080.1	hydroxyproline-rich glycoprotein family protein
1276	13	36309278	Glyma.13G257700	ELT_Q	0.1606	6.3723	4.24514e-07
1277	13	36309278	Glyma.13G257800	ELT_Q	0.1606	6.3723	4.24514e-07	AT5G09530.1	hydroxyproline-rich glycoprotein family protein
1278	13	36309278	Glyma.13G257900	ELT_Q	0.1606	6.3723	4.24514e-07
1279	13	36309278	Glyma.13G258000	ELT_Q	0.1606	6.3723	4.24514e-07
1280	13	36309278	Glyma.13G258100	ELT_Q	0.1606	6.3723	4.24514e-07
1281	13	36309278	Glyma.13G258200	ELT_Q	0.1606	6.3723	4.24514e-07	AT3G12587.1	Oligosaccaryltransferase
1282	13	36309278	Glyma.13G258300	ELT_Q	0.1606	6.3723	4.24514e-07	AT1G58120.1
1283	13	36309278	Glyma.13G258400	ELT_Q	0.1606	6.3723	4.24514e-07	AT1G58122.1	conserved peptide upstream open reading frame 45
1284	13	36309278	Glyma.13G258500	ELT_Q	0.1606	6.3723	4.24514e-07	AT5G64350.1	FK506-binding protein 12
1285	13	36309278	Glyma.13G258600	ELT_Q	0.1606	6.3723	4.24514e-07	AT4G15020.1	hAT transposon superfamily
1286	13	36309278	Glyma.13G258700	ELT_Q	0.1606	6.3723	4.24514e-07	AT5G64330.1	Phototropic-responsive NPH3 family protein
1287	13	36309278	Glyma.13G258800	ELT_Q	0.1606	6.3723	4.24514e-07	AT1G24793.2	UDP-3-O-acyl N-acetylglycosamine deacetylase family protein
1288	13	36309278	Glyma.13G258900	ELT_Q	0.1606	6.3723	4.24514e-07	AT3G07140.1	GPI transamidase component Gpi16 subunit family protein
1289	13	36309278	Glyma.13G259000	ELT_Q	0.1606	6.3723	4.24514e-07
1290	13	37284883	Glyma.13G270600	ELT_Q	1.5012	34.1546	7.02497e-35	AT2G42590.2	general regulatory factor 9
1291	13	37284883	Glyma.13G270700	ELT_Q	1.5012	34.1546	7.02497e-35	AT4G18596.1	Pollen Ole e 1 allergen and extensin family protein
1292	13	37284883	Glyma.13G270800	ELT_Q	1.5012	34.1546	7.02497e-35	AT1G78870.2	ubiquitin-conjugating enzyme 35
1293	13	37284883	Glyma.13G270900	ELT_Q	1.5012	34.1546	7.02497e-35	AT1G53300.1	tetratricopetide-repeat thioredoxin-like 1
1294	13	37284883	Glyma.13G271000	ELT_Q	1.5012	34.1546	7.02497e-35	AT3G14960.1	Galactosyltransferase family protein
1295	13	37284883	Glyma.13G271100	ELT_Q	1.5012	34.1546	7.02497e-35	AT3G14980.1	Acyl-CoA N-acyltransferase with RING/FYVE/PHD-type zinc finger protein
1296	13	37284883	Glyma.13G271200	ELT_Q	1.5012	34.1546	7.02497e-35	AT1G53280.1	Class I glutamine amidotransferase-like superfamily protein
1297	13	37284883	Glyma.13G271300	ELT_Q	1.5012	34.1546	7.02497e-35	AT1G53270.1	ABC-2 type transporter family protein
1298	13	37284883	Glyma.13G271400	ELT_Q	1.5012	34.1546	7.02497e-35	AT3G15000.1	cobalt ion binding
1299	13	37284883	Glyma.13G271500	ELT_Q	1.5012	34.1546	7.02497e-35	AT5G20040.1	isopentenyltransferase 9
1300	13	37284883	Glyma.13G271600	ELT_Q	1.5012	34.1546	7.02497e-35	AT2G31085.1	CLAVATA3/ESR-RELATED 6
1301	13	42372713	Glyma.13G328700	ELS_Q	0.3139	20.8959	1.27306e-21	AT3G45600.1	tetraspanin3
1302	13	42372713	Glyma.13G328800	ELS_Q	0.3139	20.8959	1.27306e-21
1303	13	42372713	Glyma.13G328900	ELS_Q	0.3139	20.8959	1.27306e-21	AT5G60210.1	ROP interactive partner 5
1304	13	42372713	Glyma.13G329000	ELS_Q	0.3139	20.8959	1.27306e-21	AT5G60200.1	TARGET OF MONOPTEROS 6
1305	13	42372713	Glyma.13G329100	ELS_Q	0.3139	20.8959	1.27306e-21	AT2G28520.1	vacuolar proton ATPase A1
1306	13	42372713	Glyma.13G329200	ELS_Q	0.3139	20.8959	1.27306e-21
1307	13	42372713	Glyma.13G329300	ELS_Q	0.3139	20.8959	1.27306e-21	AT3G45620.1	Transducin/WD40 repeat-like superfamily protein
1308	13	42372713	Glyma.13G329400	ELS_Q	0.3139	20.8959	1.27306e-21
1309	14	3760081	Glyma.14G046300	ELT_Q	0.2916	4.3671	4.29608e-05	AT3G21630.1	chitin elicitor receptor kinase 1
1310	14	3760081	Glyma.14G046400	ELT_Q	0.2916	4.3671	4.29608e-05	AT1G05065.1	CLAVATA3/ESR-RELATED 20
1311	14	3760081	Glyma.14G046500	ELT_Q	0.2916	4.3671	4.29608e-05	AT1G05060.1
1312	14	3760081	Glyma.14G046600	ELT_Q	0.2916	4.3671	4.29608e-05	AT2G32640.1	Lycopene beta/epsilon cyclase protein
1313	14	3760081	Glyma.14G046700	ELT_Q	0.2916	4.3671	4.29608e-05	AT2G32650.1	RmlC-like cupins superfamily protein
1314	14	3760081	Glyma.14G046800	ELT_Q	0.2916	4.3671	4.29608e-05	AT4G15415.1	Protein phosphatase 2A regulatory B subunit family protein
1315	14	3760081	Glyma.14G046900	ELT_Q	0.2916	4.3671	4.29608e-05	AT4G15410.1	serine/threonine protein phosphatase 2A 55 kDa regulatory subunit B prime gamma
1316	14	3760081	Glyma.14G047000	ELT_Q	0.2916	4.3671	4.29608e-05	AT1G62360.1	KNOX/ELK homeobox transcription factor
1317	14	3760081	Glyma.14G047100	ELT_Q	0.2916	4.3671	4.29608e-05	AT5G55140.1	ribosomal protein L30 family protein
1318	14	3760081	Glyma.14G047200	ELT_Q	0.2916	4.3671	4.29608e-05	AT3G21670.1	Major facilitator superfamily protein
1319	14	3760081	Glyma.14G047300	ELT_Q	0.2916	4.3671	4.29608e-05
1320	14	3760081	Glyma.14G047400	ELT_Q	0.2916	4.3671	4.29608e-05	AT5G42370.1	Calcineurin-like metallo-phosphoesterase superfamily protein
1321	14	3760081	Glyma.14G047500	ELT_Q	0.2916	4.3671	4.29608e-05	AT2G32990.1	glycosyl hydrolase 9B8
1322	14	3760081	Glyma.14G047600	ELT_Q	0.2916	4.3671	4.29608e-05
1323	14	3760081	Glyma.14G047700	ELT_Q	0.2916	4.3671	4.29608e-05	AT2G05760.1	Xanthine/uracil permease family protein
1324	14	3760081	Glyma.14G047800	ELT_Q	0.2916	4.3671	4.29608e-05	AT2G04160.1	Subtilisin-like serine endopeptidase family protein
1325	14	3760081	Glyma.14G047900	ELT_Q	0.2916	4.3671	4.29608e-05	AT4G08850.1	Leucine-rich repeat receptor-like protein kinase family protein
1326	14	3760081	Glyma.14G048000	ELT_Q	0.2916	4.3671	4.29608e-05	AT2G04160.1	Subtilisin-like serine endopeptidase family protein
1327	14	3760081	Glyma.14G048100	ELT_Q	0.2916	4.3671	4.29608e-05	AT4G08850.1	Leucine-rich repeat receptor-like protein kinase family protein
1328	14	3760081	Glyma.14G048200	ELT_Q	0.2916	4.3671	4.29608e-05	AT2G04160.1	Subtilisin-like serine endopeptidase family protein
1329	14	3760081	Glyma.14G048300	ELT_Q	0.2916	4.3671	4.29608e-05	AT1G35710.1	Protein kinase family protein with leucine-rich repeat domain
1330	14	3760081	Glyma.14G048400	ELT_Q	0.2916	4.3671	4.29608e-05	AT2G05790.1	O-Glycosyl hydrolases family 17 protein
1331	14	3760081	Glyma.14G048500	ELT_Q	0.2916	4.3671	4.29608e-05	AT5G48770.1	Disease resistance protein (TIR-NBS-LRR class) family
1332	14	17411748	Glyma.14G120900	ELS_Q	0.2983	25.7712	1.6971e-26	AT1G77110.1	Auxin efflux carrier family protein
1333	14	17411748	Glyma.14G121000	ELS_Q	0.2983	25.7712	1.6971e-26	AT5G03940.1	chloroplast signal recognition particle 54 kDa subunit
1334	14	17411748	Glyma.14G121100	ELS_Q	0.2983	25.7712	1.6971e-26	AT2G05642.1	Nucleic acid-binding, OB-fold-like protein
1335	14	17411748	Glyma.14G121200	ELS_Q	0.2983	25.7712	1.6971e-26	AT1G77120.1	alcohol dehydrogenase 1
1336	14	17411748	Glyma.14G121300	ELS_Q	0.2983	25.7712	1.6971e-26	AT4G07990.2	Chaperone DnaJ-domain superfamily protein
1337	14	17411748	Glyma.14G121400	ELS_Q	0.2983	25.7712	1.6971e-26	AT1G43800.1	Plant stearoyl-acyl-carrier-protein desaturase family protein
1338	14	17411748	Glyma.14G121500	ELS_Q	0.2983	25.7712	1.6971e-26	AT1G78810.1
1339	14	17411748	Glyma.14G121600	ELS_Q	0.2983	25.7712	1.6971e-26	AT4G10180.1	light-mediated development protein 1 / deetiolated1 (DET1)
1340	14	17411748	Glyma.14G121700	ELS_Q	0.2983	25.7712	1.6971e-26	AT1G22260.1	Myosin heavy chain-related protein
1341	14	17411748	Glyma.14G121800	ELS_Q	0.2983	25.7712	1.6971e-26	AT1G43790.1	tracheary element differentiation-related 6
1342	14	43135520	Glyma.14G173500	ELT_Q	0.3799	17.8425	1.43938e-18	AT1G55020.1	lipoxygenase 1
1343	14	43135520	Glyma.14G173600	ELT_Q	0.3799	17.8425	1.43938e-18	AT3G28890.1	receptor like protein 43
1344	14	43135520	Glyma.14G173700	ELT_Q	0.3799	17.8425	1.43938e-18	AT1G08590.1	Leucine-rich receptor-like protein kinase family protein
1345	14	43135520	Glyma.14G173800	ELT_Q	0.3799	17.8425	1.43938e-18	AT1G18800.1	NAP1-related protein 2
1346	14	43135520	Glyma.14G173900	ELT_Q	0.3799	17.8425	1.43938e-18	AT1G45616.1	receptor like protein 6
1347	14	43135520	Glyma.14G174000	ELT_Q	0.3799	17.8425	1.43938e-18	AT5G53160.1	regulatory components of ABA receptor 3
1348	14	43135520	Glyma.14G174100	ELT_Q	0.3799	17.8425	1.43938e-18	AT2G21870.2	copper ion binding;cobalt ion binding;zinc ion binding
1349	14	43135520	Glyma.14G174200	ELT_Q	0.3799	17.8425	1.43938e-18	AT4G08920.1	cryptochrome 1
1350	14	43135520	Glyma.14G174300	ELT_Q	0.3799	17.8425	1.43938e-18	AT1G31885.1	NOD26-like intrinsic protein 3;1
1351	14	43135520	Glyma.14G174400	ELT_Q	0.3799	17.8425	1.43938e-18	AT1G78230.1	Outer arm dynein light chain 1 protein
1352	14	43135520	Glyma.14G174500	ELT_Q	0.3799	17.8425	1.43938e-18	AT1G78240.1	S-adenosyl-L-methionine-dependent methyltransferases superfamily protein
1353	15	13596285	Glyma.15G159600	ELS_Q	0.4596	78.6417	2.29736e-79
1354	15	13596285	Glyma.15G159700	ELS_Q	0.4596	78.6417	2.29736e-79	AT4G10250.1	HSP20-like chaperones superfamily protein
1355	15	13596285	Glyma.15G159800	ELS_Q	0.4596	78.6417	2.29736e-79
1356	15	13596285	Glyma.15G159900	ELS_Q	0.4596	78.6417	2.29736e-79
1357	15	13596285	Glyma.15G160000	ELS_Q	0.4596	78.6417	2.29736e-79
1358	15	13596285	Glyma.15G160100	ELS_Q	0.4596	78.6417	2.29736e-79
1359	15	13596285	Glyma.15G160200	ELS_Q	0.4596	78.6417	2.29736e-79
1360	15	13596285	Glyma.15G160300	ELS_Q	0.4596	78.6417	2.29736e-79	AT3G54070.1	Ankyrin repeat family protein
1361	15	13596285	Glyma.15G160400	ELS_Q	0.4596	78.6417	2.29736e-79	AT3G54070.1	Ankyrin repeat family protein
1362	15	13596285	Glyma.15G160500	ELS_Q	0.4596	78.6417	2.29736e-79	AT2G22370.1
1363	15	13596285	Glyma.15G160600	ELS_Q	0.4596	78.6417	2.29736e-79	AT3G54070.1	Ankyrin repeat family protein
1364	15	13596285	Glyma.15G160700	ELS_Q	0.4596	78.6417	2.29736e-79	AT3G54070.1	Ankyrin repeat family protein
1365	15	13596285	Glyma.15G160800	ELS_Q	0.4596	78.6417	2.29736e-79	AT3G50120.1	Plant protein of unknown function (DUF247)
1366	15	13596285	Glyma.15G160900	ELS_Q	0.4596	78.6417	2.29736e-79	AT5G41750.1	Disease resistance protein (TIR-NBS-LRR class) family
1367	15	13596285/13840925	Glyma.15G161000	ELS_Q	0.4596	78.6417	2.29736e-79	AT1G31160.1	HISTIDINE TRIAD NUCLEOTIDE-BINDING 2
1368	15	13596285/13840925	Glyma.15G161100	ELS_Q	0.4596	78.6417	2.29736e-79	AT1G21065.1
1369	15	13596285/13840925	Glyma.15G161200	ELS_Q	0.4596	78.6417	2.29736e-79	AT2G18890.1	Protein kinase superfamily protein
1370	15	13596285/13840925	Glyma.15G161300	ELS_Q	0.4596	78.6417	2.29736e-79	AT5G24080.1	Protein kinase superfamily protein
1371	15	13596285/13840925	Glyma.15G161400	ELS_Q	0.4596	78.6417	2.29736e-79	AT1G70250.1	receptor serine/threonine kinase, putative
1372	15	13596285/13840925	Glyma.15G161500	ELS_Q	0.4596	78.6417	2.29736e-79	AT1G34300.1	lectin protein kinase family protein
1373	15	13596285/13840925	Glyma.15G161600	ELS_Q	0.4596	78.6417	2.29736e-79	AT1G34300.1	lectin protein kinase family protein
1374	15	13596285/13840925	Glyma.15G161700	ELS_Q	0.4596	78.6417	2.29736e-79	AT5G38240.1	Protein kinase family protein
1375	15	13596285/13840925	Glyma.15G161800	ELS_Q	0.4596	78.6417	2.29736e-79	AT1G34300.1	lectin protein kinase family protein
1376	15	13596285/13840925	Glyma.15G161900	ELS_Q	0.4596	78.6417	2.29736e-79	AT5G38240.1	Protein kinase family protein
1377	15	13596285/13840925	Glyma.15G162000	ELS_Q	0.4596	78.6417	2.29736e-79	AT1G34300.1	lectin protein kinase family protein
1378	15	13840925	Glyma.15G162100	ELS_Q	0.8301	14.8215	1.51009e-15	AT1G70530.1	cysteine-rich RLK (RECEPTOR-like protein kinase) 3
1379	15	13840925	Glyma.15G162200	ELS_Q	0.8301	14.8215	1.51009e-15	AT1G34300.1	lectin protein kinase family protein
1380	15	13840925	Glyma.15G162300	ELS_Q	0.8301	14.8215	1.51009e-15	AT5G57360.1	Galactose oxidase/kelch repeat superfamily protein
1381	15	13840925	Glyma.15G162400	ELS_Q	0.8301	14.8215	1.51009e-15	AT2G01050.1	zinc ion binding;nucleic acid binding
1382	15	13840925	Glyma.15G162500	ELS_Q	0.8301	14.8215	1.51009e-15	AT2G18940.1	Tetratricopeptide repeat (TPR)-like superfamily protein
1383	15	13840925	Glyma.15G162600	ELS_Q	0.8301	14.8215	1.51009e-15	AT4G30190.1	H(+)-ATPase 2
1384	15	13840925	Glyma.15G162700	ELS_Q	0.8301	14.8215	1.51009e-15	AT5G46270.1	Disease resistance protein (TIR-NBS-LRR class) family
1385	15	13840925	Glyma.15G162800	ELS_Q	0.8301	14.8215	1.51009e-15	AT4G30180.1	sequence-specific DNA binding transcription factors;transcription regulators
1386	15	13840925	Glyma.15G162900	ELS_Q	0.8301	14.8215	1.51009e-15	AT2G25800.1	Protein of unknown function (DUF810)
1387	15	13840925	Glyma.15G163000	ELS_Q	0.8301	14.8215	1.51009e-15	AT1G62510.1	Bifunctional inhibitor/lipid-transfer protein/seed storage 2S albumin superfamily protein
1388	15	13840925	Glyma.15G163100	ELS_Q	0.8301	14.8215	1.51009e-15	AT4G25910.1	NFU domain protein 3
1389	15	19580848	Glyma.15G186900	ELS_Q	0.3428	9.1177	9.18802e-11	AT1G03080.1	kinase interacting (KIP1-like) family protein
1390	15	19580848/19672934	Glyma.15G187000	ELS_Q/ELT_QEI	0.3428	9.1177	9.18802e-11	AT5G48960.1	HAD-superfamily hydrolase, subfamily IG, 5\'-nucleotidase
1391	15	19580848/19672934	Glyma.15G187100	ELS_Q/ELT_QEI	0.3428	9.1177	9.18802e-11	AT2G01690.2	ARM repeat superfamily protein
1392	15	19580848/19672934	Glyma.15G187200	ELS_Q/ELT_QEI	0.3428	9.1177	9.18802e-11	AT3G45040.1	phosphatidate cytidylyltransferase family protein
1393	15	19580848/19672934	Glyma.15G187300	ELS_Q/ELT_QEI	0.3428	9.1177	9.18802e-11	AT5G55060.1
1394	15	19580848/19672934	Glyma.15G187400	ELS_Q/ELT_QEI	0.3428	9.1177	9.18802e-11	AT3G17510.1	CBL-interacting protein kinase 1
1395	15	19580848/19672934	Glyma.15G187500	ELS_Q/ELT_QEI	0.3428	9.1177	9.18802e-11	AT3G17450.1	hAT dimerisation domain-containing protein
1396	15	19580848/19672934	Glyma.15G187600	ELS_Q/ELT_QEI	0.3428	9.1177	9.18802e-11	ATMG00665.1	NADH dehydrogenase 5B
1397	15	19580848/19672934	Glyma.15G187700	ELS_Q/ELT_QEI	0.3428	9.1177	9.18802e-11
1398	15	19580848/19672934	Glyma.15G187800	ELS_Q/ELT_QEI	0.3428	9.1177	9.18802e-11	ATMG00665.1	NADH dehydrogenase 5B
1399	15	19580848/19672934	Glyma.15G187900	ELS_Q/ELT_QEI	0.3428	9.1177	9.18802e-11
1400	15	19580848/19672934	Glyma.15G188000	ELS_Q/ELT_QEI	0.3428	9.1177	9.18802e-11	ATMG00510.1	NADH dehydrogenase subunit 7
1401	15	19580848/19672934	Glyma.15G188100	ELS_Q/ELT_QEI	0.3428	9.1177	9.18802e-11	AT3G53690.1	RING/U-box superfamily protein
1402	15	19580848/19672934	Glyma.15G188200	ELS_Q/ELT_QEI	0.3428	9.1177	9.18802e-11	AT3G53690.1	RING/U-box superfamily protein
1403	15	19580848/19672934	Glyma.15G188300	ELS_Q/ELT_QEI	0.3428	9.1177	9.18802e-11	AT3G43240.1	ARID/BRIGHT DNA-binding domain-containing protein
1404	15	19580848/19672934	Glyma.15G188400	ELS_Q/ELT_QEI	0.3428	9.1177	9.18802e-11	ATCG00700.1	photosystem II reaction center protein N
1405	15	19580848/19672934	Glyma.15G188500	ELS_Q/ELT_QEI	0.3428	9.1177	9.18802e-11	AT3G06483.1	pyruvate dehydrogenase kinase
1406	15	19580848/19672934	Glyma.15G188600	ELS_Q/ELT_QEI	0.3428	9.1177	9.18802e-11	AT4G21980.2	Ubiquitin-like superfamily protein
1407	15	19580848/19672934	Glyma.15G188700	ELS_Q/ELT_QEI	0.3428	9.1177	9.18802e-11	AT1G07230.1	non-specific phospholipase C1
1408	15	19580848/19672934	Glyma.15G188800	ELS_Q/ELT_QEI	0.3428	9.1177	9.18802e-11	AT1G48170.1
1409	15	19580848/19672934	Glyma.15G188900	ELS_Q/ELT_QEI	0.3428	9.1177	9.18802e-11	AT3G17430.1	Nucleotide-sugar transporter family protein
1410	15	19672934	Glyma.15G189000	ELT_QEI	0.6851	9.5715	2.68458e-10	AT3G28200.1	Peroxidase superfamily protein
1411	15	19672934	Glyma.15G189100	ELT_QEI	0.6851	9.5715	2.68458e-10	AT1G06720.1	P-loop containing nucleoside triphosphate hydrolases superfamily protein
1412	15	23055976	Glyma.15G196900	ELT_QEI	0.7047	9.8414	1.44211e-10	AT1G29380.1	Carbohydrate-binding X8 domain superfamily protein
1413	15	23055976	Glyma.15G197000	ELT_QEI	0.7047	9.8414	1.44211e-10	AT1G19290.1	Pentatricopeptide repeat (PPR) superfamily protein
1414	15	23055976	Glyma.15G197100	ELT_QEI	0.7047	9.8414	1.44211e-10	AT1G30280.1	Chaperone DnaJ-domain superfamily protein
1415	15	23055976	Glyma.15G197200	ELT_QEI	0.7047	9.8414	1.44211e-10	AT2G34620.1	Mitochondrial transcription termination factor family protein
1416	15	23055976	Glyma.15G197300	ELT_QEI	0.7047	9.8414	1.44211e-10	AT1G30270.1	CBL-interacting protein kinase 23
1417	15	23055976	Glyma.15G197400	ELT_QEI	0.7047	9.8414	1.44211e-10	AT3G51700.1	PIF1 helicase
1418	15	23055976	Glyma.15G197500	ELT_QEI	0.7047	9.8414	1.44211e-10
1419	15	23055976	Glyma.15G197600	ELT_QEI	0.7047	9.8414	1.44211e-10	AT5G46150.1	LEM3 (ligand-effect modulator 3) family protein / CDC50 family protein
1420	15	23055976	Glyma.15G197700	ELT_QEI	0.7047	9.8414	1.44211e-10	AT5G46150.1	LEM3 (ligand-effect modulator 3) family protein / CDC50 family protein
1421	15	23055976	Glyma.15G197800	ELT_QEI	0.7047	9.8414	1.44211e-10	AT5G34940.2	glucuronidase 3
1422	15	23055976	Glyma.15G197900	ELT_QEI	0.7047	9.8414	1.44211e-10	AT5G25190.1	Integrase-type DNA-binding superfamily protein
1423	15	23055976	Glyma.15G198000	ELT_QEI	0.7047	9.8414	1.44211e-10	AT3G51700.1	PIF1 helicase
1424	15	23055976	Glyma.15G198100	ELT_QEI	0.7047	9.8414	1.44211e-10	AT5G35080.1
1425	15	23055976	Glyma.15G198200	ELT_QEI	0.7047	9.8414	1.44211e-10	AT5G41980.1
1426	15	26569938	Glyma.15G203900	ELT_Q	0.5554	10.1479	7.12068e-11	AT2G24260.1	LJRHL1-like 1
1427	15	26569938	Glyma.15G204000	ELT_Q	0.5554	10.1479	7.12068e-11	AT1G32490.2	RNA helicase family protein
1428	15	26569938	Glyma.15G204100	ELT_Q	0.5554	10.1479	7.12068e-11	AT1G32490.1	RNA helicase family protein
1429	15	26569938	Glyma.15G204200	ELT_Q	0.5554	10.1479	7.12068e-11	AT1G67120.1	ATPases;nucleotide binding;ATP binding;nucleoside-triphosphatases;transcription factor binding
1430	15	36376641	Glyma.15G217500	ELS_Q	0.2651	4.5608	2.75036e-05	AT1G30820.1	CTP synthase family protein
1431	15	36376641	Glyma.15G217600	ELS_Q	0.2651	4.5608	2.75036e-05
1432	15	36376641	Glyma.15G217700	ELS_Q	0.2651	4.5608	2.75036e-05	AT2G44310.1	Calcium-binding EF-hand family protein
1433	15	37741643/37803268	Glyma.15G219100	ELT_Q	0.396	12.5045	3.24012e-14	AT1G79340.1	metacaspase 4
1434	15	37741643/37803268	Glyma.15G219200	ELT_Q	0.396	12.5045	3.24012e-14	AT1G79350.1	RING/FYVE/PHD zinc finger superfamily protein
1435	15	37803268	Glyma.15G219300	ELT_Q	0.4472	9.5494	2.8245e-10	AT1G79380.1	Ca(2)-dependent phospholipid-binding protein (Copine) family
1436	15	42784617	Glyma.15G228400	ELT_QEI	0.7631	10.645	2.53311e-12
1437	15	42784617	Glyma.15G228500	ELT_QEI	0.7631	10.645	2.53311e-12
1438	15	42784617	Glyma.15G228600	ELT_QEI	0.7631	10.645	2.53311e-12	AT1G09220.1	Pentatricopeptide repeat (PPR) superfamily protein
1439	15	42784617	Glyma.15G228700	ELT_QEI	0.7631	10.645	2.53311e-12	AT3G08620.1	RNA-binding KH domain-containing protein
1440	15	42784617	Glyma.15G228800	ELT_QEI	0.7631	10.645	2.53311e-12	AT4G00752.1	UBX domain-containing protein
1441	15	42784617	Glyma.15G228900	ELT_QEI	0.7631	10.645	2.53311e-12	AT4G00752.1	UBX domain-containing protein
1442	15	42784617	Glyma.15G229000	ELT_QEI	0.7631	10.645	2.53311e-12	AT2G38090.1	Duplicated homeodomain-like superfamily protein
1443	15	42784617	Glyma.15G229100	ELT_QEI	0.7631	10.645	2.53311e-12	AT5G07010.1	sulfotransferase 2A
1444	15	42784617	Glyma.15G229200	ELT_QEI	0.7631	10.645	2.53311e-12	AT5G59990.1	CCT motif family protein
1445	15	42784617	Glyma.15G229300	ELT_QEI	0.7631	10.645	2.53311e-12	AT5G06990.1	Protein of unknown function, DUF617
1446	15	46048865	Glyma.15G241200	ELS_Q	0.1742	3.3254	0.000472897	AT1G68520.1	B-box type zinc finger protein with CCT domain
1447	15	46048865	Glyma.15G241300	ELS_Q	0.1742	3.3254	0.000472897	AT2G19070.1	spermidine hydroxycinnamoyl transferase
1448	15	46048865	Glyma.15G241400	ELS_Q	0.1742	3.3254	0.000472897	AT5G03540.3	exocyst subunit exo70 family protein A1
1449	15	46048865	Glyma.15G241500	ELS_Q	0.1742	3.3254	0.000472897	AT5G22610.1	F-box/RNI-like/FBD-like domains-containing protein
1450	15	46048865	Glyma.15G241600	ELS_Q	0.1742	3.3254	0.000472897	AT2G46370.4	Auxin-responsive GH3 family protein
1451	15	46048865	Glyma.15G241700	ELS_Q	0.1742	3.3254	0.000472897	AT5G25880.1	NADP-malic enzyme 3
1452	15	46048865	Glyma.15G241800	ELS_Q	0.1742	3.3254	0.000472897	AT5G44490.1	FBD, F-box, Skp2-like and Leucine Rich Repeat domains containing protein
1453	15	46048865	Glyma.15G241900	ELS_Q	0.1742	3.3254	0.000472897	AT5G22670.1	F-box/RNI-like/FBD-like domains-containing protein
1454	15	46048865	Glyma.15G242000	ELS_Q	0.1742	3.3254	0.000472897	AT3G59190.1	F-box/RNI-like superfamily protein
1455	15	46048865	Glyma.15G242100	ELS_Q	0.1742	3.3254	0.000472897	AT4G16566.1	histidine triad nucleotide-binding 4
1456	15	46048865	Glyma.15G242200	ELS_Q	0.1742	3.3254	0.000472897	AT3G14710.1	RNI-like superfamily protein
1457	15	46048865	Glyma.15G242300	ELS_Q	0.1742	3.3254	0.000472897
1458	15	46048865	Glyma.15G242400	ELS_Q	0.1742	3.3254	0.000472897	AT3G14710.1	RNI-like superfamily protein
1459	15	46048865	Glyma.15G242500	ELS_Q	0.1742	3.3254	0.000472897	AT2G16600.1	rotamase CYP 3
1460	15	47718080	Glyma.15G249100	ELS_Q	0.4033	26.776	1.67879e-27	AT1G68600.1	Aluminium activated malate transporter family protein
1461	15	47718080	Glyma.15G249200	ELS_Q	0.4033	26.776	1.67879e-27
1462	15	47718080	Glyma.15G249300	ELS_Q	0.4033	26.776	1.67879e-27
1463	15	47718080	Glyma.15G249400	ELS_Q	0.4033	26.776	1.67879e-27
1464	15	47718080	Glyma.15G249500	ELS_Q	0.4033	26.776	1.67879e-27	AT1G34070.1
1465	15	47718080	Glyma.15G249600	ELS_Q	0.4033	26.776	1.67879e-27
1466	15	47718080	Glyma.15G249700	ELS_Q	0.4033	26.776	1.67879e-27	AT5G46210.1	cullin4
1467	15	47718080	Glyma.15G249800	ELS_Q	0.4033	26.776	1.67879e-27	AT1G17147.1	VQ motif-containing protein
1468	15	47718080	Glyma.15G249900	ELS_Q	0.4033	26.776	1.67879e-27	AT3G14450.1	CTC-interacting domain 9
1469	15	47718080	Glyma.15G250000	ELS_Q	0.4033	26.776	1.67879e-27
1470	15	51651943	Glyma.15G275400	ELT_QEI	0.3093	4.3515	4.4527e-05	AT3G07970.1	Pectin lyase-like superfamily protein
1471	15	51651943	Glyma.15G275500	ELT_QEI	0.3093	4.3515	4.4527e-05	AT3G60830.1	actin-related protein 7
1472	15	51651943	Glyma.15G275600	ELT_QEI	0.3093	4.3515	4.4527e-05	AT1G51400.1	Photosystem II 5 kD protein
1473	15	51651943	Glyma.15G275700	ELT_QEI	0.3093	4.3515	4.4527e-05	AT1G51400.1	Photosystem II 5 kD protein
1474	15	51651943	Glyma.15G275800	ELT_QEI	0.3093	4.3515	4.4527e-05
1475	15	51651943	Glyma.15G275900	ELT_QEI	0.3093	4.3515	4.4527e-05	AT3G08010.1	RNA binding
1476	15	51651943	Glyma.15G276000	ELT_QEI	0.3093	4.3515	4.4527e-05	AT3G23890.1	topoisomerase II
1477	15	51651943	Glyma.15G276100	ELT_QEI	0.3093	4.3515	4.4527e-05	AT3G08030.1	Protein of unknown function, DUF642
1478	15	51651943	Glyma.15G276200	ELT_QEI	0.3093	4.3515	4.4527e-05	AT1G35430.1
1479	15	51651943	Glyma.15G276300	ELT_QEI	0.3093	4.3515	4.4527e-05	AT5G13710.1	sterol methyltransferase 1
1480	15	51651943	Glyma.15G276400	ELT_QEI	0.3093	4.3515	4.4527e-05	AT4G12290.1	Copper amine oxidase family protein
1481	15	51651943	Glyma.15G276500	ELT_QEI	0.3093	4.3515	4.4527e-05	AT5G13700.1	polyamine oxidase 1
1482	15	51651943	Glyma.15G276600	ELT_QEI	0.3093	4.3515	4.4527e-05	AT4G10265.1	Wound-responsive family protein
1483	15	51651943	Glyma.15G276700	ELT_QEI	0.3093	4.3515	4.4527e-05	AT5G13720.1	Uncharacterised protein family (UPF0114)
1484	15	51651943	Glyma.15G276800	ELT_QEI	0.3093	4.3515	4.4527e-05	AT1G68890.1	magnesium ion binding;thiamin pyrophosphate binding;hydro-lyases;catalytics;2-succinyl-5-enolpyruvyl-6-hydroxy-3-cyclohexene-1-carboxylic-acid synthases
1485	15	51651943	Glyma.15G276900	ELT_QEI	0.3093	4.3515	4.4527e-05	AT3G20020.1	protein arginine methyltransferase 6
1486	15	51651943	Glyma.15G277000	ELT_QEI	0.3093	4.3515	4.4527e-05	AT4G02750.1	Tetratricopeptide repeat (TPR)-like superfamily protein
1487	15	51651943	Glyma.15G277100	ELT_QEI	0.3093	4.3515	4.4527e-05	AT1G68890.1	magnesium ion binding;thiamin pyrophosphate binding;hydro-lyases;catalytics;2-succinyl-5-enolpyruvyl-6-hydroxy-3-cyclohexene-1-carboxylic-acid synthases
1488	15	51651943	Glyma.15G277200	ELT_QEI	0.3093	4.3515	4.4527e-05	AT1G52370.1	Ribosomal protein L22p/L17e family protein
1489	15	51651943	Glyma.15G277300	ELT_QEI	0.3093	4.3515	4.4527e-05	AT1G01920.1	SET domain-containing protein
1490	15	51651943	Glyma.15G277400	ELT_QEI	0.3093	4.3515	4.4527e-05	AT1G62310.1	transcription factor jumonji (jmjC) domain-containing protein
1491	16	921931	Glyma.16G010500	ELT_Q	1.5737	32.0112	9.77107e-33	AT5G66840.1	SAP domain-containing protein
1492	16	921931	Glyma.16G010600	ELT_Q	1.5737	32.0112	9.77107e-33
1493	16	921931	Glyma.16G010700	ELT_Q	1.5737	32.0112	9.77107e-33
1494	16	921931	Glyma.16G010800	ELT_Q	1.5737	32.0112	9.77107e-33	AT1G11890.1	Synaptobrevin family protein
1495	16	921931	Glyma.16G010900	ELT_Q	1.5737	32.0112	9.77107e-33	AT3G14170.1	Plant protein of unknown function (DUF936)
1496	16	17762135	Glyma.16G095900	ELS_Q	0.2602	4.3931	4.04616e-05	AT1G47128.1	Granulin repeat cysteine protease family protein
1497	16	17762135	Glyma.16G096000	ELS_Q	0.2602	4.3931	4.04616e-05	AT4G20310.2	Peptidase M50 family protein
1498	16	17762135	Glyma.16G096100	ELS_Q	0.2602	4.3931	4.04616e-05
1499	16	22326168	Glyma.16G108400	ELT_QEI	0.8903	12.3905	4.23066e-14	AT2G35612.1
1500	16	22326168	Glyma.16G108500	ELT_QEI	0.8903	12.3905	4.23066e-14	AT5G66816.1
1501	16	22326168	Glyma.16G108600	ELT_QEI	0.8903	12.3905	4.23066e-14
1502	16	28008031	Glyma.16G127900	ELT_QEI	0.5097	7.1441	9.71052e-09	AT5G36930.2	Disease resistance protein (TIR-NBS-LRR class) family
1503	16	28008031	Glyma.16G128000	ELT_QEI	0.5097	7.1441	9.71052e-09	AT5G17680.1	disease resistance protein (TIR-NBS-LRR class), putative
1504	16	28008031	Glyma.16G128100	ELT_QEI	0.5097	7.1441	9.71052e-09	AT5G24760.1	GroES-like zinc-binding dehydrogenase family protein
1505	16	28008031	Glyma.16G128200	ELT_QEI	0.5097	7.1441	9.71052e-09	AT1G73320.1	S-adenosyl-L-methionine-dependent methyltransferases superfamily protein
1506	16	28008031	Glyma.16G128300	ELT_QEI	0.5097	7.1441	9.71052e-09	AT2G36960.2	TSL-kinase interacting protein 1
1507	16	28008031	Glyma.16G128400	ELT_QEI	0.5097	7.1441	9.71052e-09	AT4G36050.1	endonuclease/exonuclease/phosphatase family protein
1508	16	28008031	Glyma.16G128500	ELT_QEI	0.5097	7.1441	9.71052e-09	AT4G36050.2	endonuclease/exonuclease/phosphatase family protein
1509	16	28008031	Glyma.16G128600	ELT_QEI	0.5097	7.1441	9.71052e-09	AT5G66210.1	calcium-dependent protein kinase 28
1510	16	28008031	Glyma.16G128700	ELT_QEI	0.5097	7.1441	9.71052e-09	AT3G51240.1	flavanone 3-hydroxylase
1511	17	637613	Glyma.17G004600	ELT_Q	0.5942	9.2926	5.10164e-10
1512	17	637613	Glyma.17G004700	ELT_Q	0.5942	9.2926	5.10164e-10	AT1G03370.1	C2 calcium/lipid-binding and GRAM domain containing protein
1513	17	637613	Glyma.17G004800	ELT_Q	0.5942	9.2926	5.10164e-10	AT2G33730.1	P-loop containing nucleoside triphosphate hydrolases superfamily protein
1514	17	637613	Glyma.17G004900	ELT_Q	0.5942	9.2926	5.10164e-10	AT5G47740.1	Adenine nucleotide alpha hydrolases-like superfamily protein
1515	17	637613	Glyma.17G005000	ELT_Q	0.5942	9.2926	5.10164e-10	AT5G47740.1	Adenine nucleotide alpha hydrolases-like superfamily protein
1516	17	637613	Glyma.17G005100	ELT_Q	0.5942	9.2926	5.10164e-10	AT5G47730.1	Sec14p-like phosphatidylinositol transfer family protein
1517	17	637613	Glyma.17G005200	ELT_Q	0.5942	9.2926	5.10164e-10	AT1G12150.1	Plant protein of unknown function (DUF827)
1518	17	637613	Glyma.17G005300	ELT_Q	0.5942	9.2926	5.10164e-10	AT5G47720.2	Thiolase family protein
1519	17	637613	Glyma.17G005400	ELT_Q	0.5942	9.2926	5.10164e-10
1520	17	637613	Glyma.17G005500	ELT_Q	0.5942	9.2926	5.10164e-10	AT5G47690.3	binding
1521	17	637613	Glyma.17G005600	ELT_Q	0.5942	9.2926	5.10164e-10	AT5G47670.1	nuclear factor Y, subunit B6
1522	17	637613	Glyma.17G005700	ELT_Q	0.5942	9.2926	5.10164e-10	AT5G47650.1	nudix hydrolase homolog 2
1523	17	637613	Glyma.17G005800	ELT_Q	0.5942	9.2926	5.10164e-10	AT1G48050.1	Ku80 family protein
1524	17	637613	Glyma.17G005900	ELT_Q	0.5942	9.2926	5.10164e-10	AT5G47635.1	Pollen Ole e 1 allergen and extensin family protein
1525	17	637613	Glyma.17G006000	ELT_Q	0.5942	9.2926	5.10164e-10	AT4G16360.3	5\'-AMP-activated protein kinase beta-2 subunit protein
1526	17	637613	Glyma.17G006100	ELT_Q	0.5942	9.2926	5.10164e-10	AT4G16370.1	oligopeptide transporter
1527	17	637613	Glyma.17G006200	ELT_Q	0.5942	9.2926	5.10164e-10	AT5G50740.3	Heavy metal transport/detoxification superfamily protein
1528	17	637613	Glyma.17G006300	ELT_Q	0.5942	9.2926	5.10164e-10	AT4G16380.1	Heavy metal transport/detoxification superfamily protein
1529	17	637613	Glyma.17G006400	ELT_Q	0.5942	9.2926	5.10164e-10
1530	17	637613	Glyma.17G006500	ELT_Q	0.5942	9.2926	5.10164e-10	AT4G16390.1	pentatricopeptide (PPR) repeat-containing protein
1531	17	637613	Glyma.17G006600	ELT_Q	0.5942	9.2926	5.10164e-10	AT4G17220.1	microtubule-associated proteins 70-5
1532	17	637613	Glyma.17G006700	ELT_Q	0.5942	9.2926	5.10164e-10	AT4G16400.1
1533	17	637613	Glyma.17G006800	ELT_Q	0.5942	9.2926	5.10164e-10	AT5G55630.1	Outward rectifying potassium channel protein
1534	17	637613	Glyma.17G006900	ELT_Q	0.5942	9.2926	5.10164e-10	AT2G04515.1
1535	17	637613	Glyma.17G007000	ELT_Q	0.5942	9.2926	5.10164e-10
1536	17	637613	Glyma.17G007100	ELT_Q	0.5942	9.2926	5.10164e-10	AT4G16410.1
1537	17	637613	Glyma.17G007200	ELT_Q	0.5942	9.2926	5.10164e-10	AT3G26300.1	cytochrome P450, family 71, subfamily B, polypeptide 34
1538	17	637613	Glyma.17G007300	ELT_Q	0.5942	9.2926	5.10164e-10	AT4G16440.1	ferredoxin hydrogenases
1539	17	637613	Glyma.17G007400	ELT_Q	0.5942	9.2926	5.10164e-10	AT2G35760.1	Uncharacterised protein family (UPF0497)
1540	17	637613	Glyma.17G007500	ELT_Q	0.5942	9.2926	5.10164e-10	AT4G16447.1
1541	17	12468831/12488598	Glyma.17G148800	ELT_Q/ELS_Q	0.9948	14.4393	3.64128e-15	AT4G33950.1	Protein kinase superfamily protein
1542	17	12468831/12488598	Glyma.17G148900	ELT_Q/ELS_Q	0.9948	14.4393	3.64128e-15	AT4G21380.1	receptor kinase 3
1543	17	12468831/12488598	Glyma.17G149000	ELT_Q/ELS_Q	0.9948	14.4393	3.64128e-15	AT4G17615.1	calcineurin B-like protein 1
1544	17	12468831/12488598	Glyma.17G149100	ELT_Q/ELS_Q	0.9948	14.4393	3.64128e-15	AT4G17616.1	Pentatricopeptide repeat (PPR) superfamily protein
1545	17	12468831/12488598	Glyma.17G149200	ELT_Q/ELS_Q	0.9948	14.4393	3.64128e-15	AT5G47090.1
1546	17	12468831/12488598	Glyma.17G149300	ELT_Q/ELS_Q	0.9948	14.4393	3.64128e-15	AT5G47080.1	casein kinase II beta chain 1
1547	17	12468831/12488598	Glyma.17G149400	ELT_Q/ELS_Q	0.9948	14.4393	3.64128e-15	AT4G17080.1	Histone H3 K4-specific methyltransferase SET7/9 family protein
1548	17	12468831/12488598	Glyma.17G149500	ELT_Q/ELS_Q	0.9948	14.4393	3.64128e-15	AT2G44680.1	casein kinase II beta subunit 4
1549	17	12468831/12488598	Glyma.17G149600	ELT_Q/ELS_Q	0.9948	14.4393	3.64128e-15	AT3G10950.1	Zinc-binding ribosomal protein family protein
1550	17	12468831/12488598	Glyma.17G149700	ELT_Q/ELS_Q	0.9948	14.4393	3.64128e-15	AT5G16920.1	Fasciclin-like arabinogalactan family protein
1551	17	12468831/12488598	Glyma.17G149800	ELT_Q/ELS_Q	0.9948	14.4393	3.64128e-15	AT2G35190.1	novel plant snare 11
1552	17	12468831/12488598	Glyma.17G149900	ELT_Q/ELS_Q	0.9948	14.4393	3.64128e-15	AT5G47070.1	Protein kinase superfamily protein
1553	17	12468831/12488598	Glyma.17G150000	ELT_Q/ELS_Q	0.9948	14.4393	3.64128e-15	AT4G17085.1	Putative membrane lipoprotein
1554	17	12468831/12488598	Glyma.17G150100	ELT_Q/ELS_Q	0.9948	14.4393	3.64128e-15	AT4G17090.1	chloroplast beta-amylase
1555	17	12468831/12488598	Glyma.17G150200	ELT_Q/ELS_Q	0.9948	14.4393	3.64128e-15	AT4G17100.1
1556	17	12468831/12488598	Glyma.17G150300	ELT_Q/ELS_Q	0.9948	14.4393	3.64128e-15	AT5G55810.1	nicotinate/nicotinamide mononucleotide adenyltransferase
1557	17	12468831/12488598	Glyma.17G150400	ELT_Q/ELS_Q	0.9948	14.4393	3.64128e-15	AT5G55830.1	Concanavalin A-like lectin protein kinase family protein
1558	17	12468831/12488598	Glyma.17G150500	ELT_Q/ELS_Q	0.9948	14.4393	3.64128e-15	AT1G61460.1	S-locus protein kinase, putative
1559	17	12468831/12488598	Glyma.17G150600	ELT_Q/ELS_Q	0.9948	14.4393	3.64128e-15	AT5G55830.1	Concanavalin A-like lectin protein kinase family protein
1560	17	12468831/12488598	Glyma.17G150700	ELT_Q/ELS_Q	0.9948	14.4393	3.64128e-15
1561	17	13595868	Glyma.17G158400	ELT_Q	0.3287	5.1264	7.47729e-06	AT5G65840.1	Thioredoxin superfamily protein
1562	17	13595868	Glyma.17G158500	ELT_Q	0.3287	5.1264	7.47729e-06	AT5G65840.1	Thioredoxin superfamily protein
1563	17	13595868	Glyma.17G158600	ELT_Q	0.3287	5.1264	7.47729e-06
1564	17	13854498	Glyma.17G159100	ELS_Q	0.4025	11.5855	2.59947e-12	AT5G65880.1
1565	17	13854498	Glyma.17G159200	ELS_Q	0.4025	11.5855	2.59947e-12	AT4G36210.1	Protein of unknown function (DUF726)
1566	17	13854498	Glyma.17G159300	ELS_Q	0.4025	11.5855	2.59947e-12	AT2G16460.1	Protein of unknown function (DUF1640)
1567	17	13854498	Glyma.17G159400	ELS_Q	0.4025	11.5855	2.59947e-12	AT3G61460.1	brassinosteroid-responsive RING-H2
1568	17	13854498	Glyma.17G159500	ELS_Q	0.4025	11.5855	2.59947e-12	AT5G65890.1	ACT domain repeat 1
1569	17	13854498	Glyma.17G159600	ELS_Q	0.4025	11.5855	2.59947e-12	AT2G22880.1	VQ motif-containing protein
1570	17	13854498	Glyma.17G159700	ELS_Q	0.4025	11.5855	2.59947e-12	AT1G74040.1	2-isopropylmalate synthase 1
1571	17	13854498	Glyma.17G159800	ELS_Q	0.4025	11.5855	2.59947e-12	AT4G37700.1
1572	17	13854498	Glyma.17G159900	ELS_Q	0.4025	11.5855	2.59947e-12	AT3G54850.1	plant U-box 14
1573	17	13854498	Glyma.17G160000	ELS_Q	0.4025	11.5855	2.59947e-12	AT1G70210.1	CYCLIN D1;1
1574	17	13854498	Glyma.17G160100	ELS_Q	0.4025	11.5855	2.59947e-12	AT5G67620.1
1575	17	13854498	Glyma.17G160200	ELS_Q	0.4025	11.5855	2.59947e-12
1576	17	21425702	Glyma.17G181200	ELT_QEI	4.5052	58.7788	1.67248e-59	AT1G03360.1	ribosomal RNA processing 4
1577	17	21425702	Glyma.17G181300	ELT_QEI	4.5052	58.7788	1.67248e-59	AT5G07090.2	Ribosomal protein S4 (RPS4A) family protein
1578	17	21425702	Glyma.17G181400	ELT_QEI	4.5052	58.7788	1.67248e-59	AT3G04580.1	Signal transduction histidine kinase, hybrid-type, ethylene sensor
1579	17	21425702	Glyma.17G181500	ELT_QEI	4.5052	58.7788	1.67248e-59	AT5G07090.1	Ribosomal protein S4 (RPS4A) family protein
1580	17	21425702	Glyma.17G181600	ELT_QEI	4.5052	58.7788	1.67248e-59	AT4G04480.1
1581	17	22296788	Glyma.17G181900	ELT_QEI	0.3975	5.5835	2.61051e-06	AT5G23580.1	calmodulin-like domain protein kinase 9
1582	17	22296788	Glyma.17G182000	ELT_QEI	0.3975	5.5835	2.61051e-06
1583	17	22296788	Glyma.17G182100	ELT_QEI	0.3975	5.5835	2.61051e-06	AT2G07698.1	ATPase, F1 complex, alpha subunit protein
1584	17	22296788/22456550	Glyma.17G182200	ELT_QEI/ELS_QEI	0.3975	5.5835	2.61051e-06	AT3G05360.1	receptor like protein 30
1585	17	22296788/22456550	Glyma.17G182300	ELT_QEI/ELS_QEI	0.3975	5.5835	2.61051e-06	AT3G11560.2	LETM1-like protein
1586	17	22296788/22456550	Glyma.17G182400	ELT_QEI/ELS_QEI	0.3975	5.5835	2.61051e-06	AT1G47840.1	hexokinase 3
1587	17	22456550	Glyma.17G182500	ELS_QEI	0.2084	3.2734	0.000532966	AT5G56030.2	heat shock protein 81-2
1588	17	22456550	Glyma.17G182600	ELS_QEI	0.2084	3.2734	0.000532966	AT4G39720.1	VQ motif-containing protein
1589	17	22456550	Glyma.17G182700	ELS_QEI	0.2084	3.2734	0.000532966	AT2G34900.1	Transcription factor GTE6
1590	17	22456550	Glyma.17G182800	ELS_QEI	0.2084	3.2734	0.000532966
1591	17	22456550	Glyma.17G182900	ELS_QEI	0.2084	3.2734	0.000532966	AT3G03960.1	TCP-1/cpn60 chaperonin family protein
1592	17	23689587	Glyma.17G184200	ELS_Q	0.7863	12.3042	4.96905e-13	AT2G24030.1	zinc ion binding;nucleic acid binding
1593	17	23689587	Glyma.17G184300	ELS_Q	0.7863	12.3042	4.96905e-13
1594	17	23689587	Glyma.17G184400	ELS_Q	0.7863	12.3042	4.96905e-13	AT1G03080.1	kinase interacting (KIP1-like) family protein
1595	17	23689587	Glyma.17G184500	ELS_Q	0.7863	12.3042	4.96905e-13	AT5G55850.1	RPM1-interacting protein 4 (RIN4) family protein
1596	17	23689587	Glyma.17G184600	ELS_Q	0.7863	12.3042	4.96905e-13
1597	17	23689587	Glyma.17G184700	ELS_Q	0.7863	12.3042	4.96905e-13	AT5G46180.1	ornithine-delta-aminotransferase
1598	17	23689587	Glyma.17G184800	ELS_Q	0.7863	12.3042	4.96905e-13	AT4G00660.1	RNAhelicase-like 8
1599	17	23689587	Glyma.17G184900	ELS_Q	0.7863	12.3042	4.96905e-13	AT5G17920.1	Cobalamin-independent synthase family protein
1600	17	23689587	Glyma.17G185000	ELS_Q	0.7863	12.3042	4.96905e-13	AT5G13180.1	NAC domain containing protein 83
1601	17	23689587	Glyma.17G185100	ELS_Q	0.7863	12.3042	4.96905e-13	AT2G35795.1	Chaperone DnaJ-domain superfamily protein
1602	17	23689587	Glyma.17G185200	ELS_Q	0.7863	12.3042	4.96905e-13	AT5G03040.1	IQ-domain 2
1603	17	23689587	Glyma.17G185300	ELS_Q	0.7863	12.3042	4.96905e-13	ATMG01410.1	open reading frame 204
1604	17	23689587	Glyma.17G185400	ELS_Q	0.7863	12.3042	4.96905e-13
1605	17	23689587	Glyma.17G185500	ELS_Q	0.7863	12.3042	4.96905e-13	AT3G22300.1	ribosomal protein S10
1606	17	23689587	Glyma.17G185600	ELS_Q	0.7863	12.3042	4.96905e-13	ATMG00640.1	hydrogen ion transporting ATP synthases, rotational mechanism;zinc ion binding
1607	17	23689587	Glyma.17G185700	ELS_Q	0.7863	12.3042	4.96905e-13
1608	17	23689587	Glyma.17G185800	ELS_Q	0.7863	12.3042	4.96905e-13	ATMG00665.1	NADH dehydrogenase 5B
1609	17	23689587	Glyma.17G185900	ELS_Q	0.7863	12.3042	4.96905e-13
1610	17	23689587	Glyma.17G186000	ELS_Q	0.7863	12.3042	4.96905e-13
1611	17	23689587	Glyma.17G186100	ELS_Q	0.7863	12.3042	4.96905e-13	ATMG00650.1	NADH dehydrogenase subunit 4L
1612	17	23689587	Glyma.17G186200	ELS_Q	0.7863	12.3042	4.96905e-13	AT2G07674.1	Unknown conserved protein
1613	17	23689587	Glyma.17G186300	ELS_Q	0.7863	12.3042	4.96905e-13
1614	17	23689587	Glyma.17G186400	ELS_Q	0.7863	12.3042	4.96905e-13	ATCG00710.1	photosystem II reaction center protein H
1615	17	23689587	Glyma.17G186500	ELS_Q	0.7863	12.3042	4.96905e-13	AT3G55510.1	Noc2p family
1616	17	23689587	Glyma.17G186600	ELS_Q	0.7863	12.3042	4.96905e-13	AT1G07930.1	GTP binding Elongation factor Tu family protein
1617	17	23689587	Glyma.17G186700	ELS_Q	0.7863	12.3042	4.96905e-13	AT2G15690.1	Tetratricopeptide repeat (TPR)-like superfamily protein
1618	17	23689587	Glyma.17G186800	ELS_Q	0.7863	12.3042	4.96905e-13	AT5G16715.1	ATP binding;valine-tRNA ligases;aminoacyl-tRNA ligases;nucleotide binding;ATP binding;aminoacyl-tRNA ligases
1619	17	23689587	Glyma.17G186900	ELS_Q	0.7863	12.3042	4.96905e-13	AT5G16715.1	ATP binding;valine-tRNA ligases;aminoacyl-tRNA ligases;nucleotide binding;ATP binding;aminoacyl-tRNA ligases
1620	17	23689587	Glyma.17G187000	ELS_Q	0.7863	12.3042	4.96905e-13	AT5G16715.1	ATP binding;valine-tRNA ligases;aminoacyl-tRNA ligases;nucleotide binding;ATP binding;aminoacyl-tRNA ligases
1621	17	23689587	Glyma.17G187100	ELS_Q	0.7863	12.3042	4.96905e-13
1622	17	23689587	Glyma.17G187200	ELS_Q	0.7863	12.3042	4.96905e-13	AT3G03770.1	Leucine-rich repeat protein kinase family protein
1623	17	25799336	Glyma.17G189300	ELT_Q	0.2677	10.2803	5.96611e-12	AT1G52190.1	Major facilitator superfamily protein
1624	17	25799336	Glyma.17G189400	ELT_Q	0.2677	10.2803	5.96611e-12	AT5G24080.1	Protein kinase superfamily protein
1625	17	25799336	Glyma.17G189500	ELT_Q	0.2677	10.2803	5.96611e-12	AT4G31410.1	Protein of unknown function (DUF1644)
1626	17	25799336	Glyma.17G189600	ELT_Q	0.2677	10.2803	5.96611e-12	AT4G31420.1	Zinc finger protein 622
1627	17	34665195	Glyma.17G210100	ELT_QEI	3.1269	41.7789	1.66967e-42	AT4G17310.1
1628	17	34665195	Glyma.17G210200	ELT_QEI	3.1269	41.7789	1.66967e-42
1629	17	34665195	Glyma.17G210300	ELT_QEI	3.1269	41.7789	1.66967e-42
1630	17	34665195	Glyma.17G210400	ELT_QEI	3.1269	41.7789	1.66967e-42	AT1G72960.1	Root hair defective 3 GTP-binding protein (RHD3)
1631	17	34665195	Glyma.17G210500	ELT_QEI	3.1269	41.7789	1.66967e-42	AT5G25390.2	Integrase-type DNA-binding superfamily protein
1632	17	34665195	Glyma.17G210600	ELT_QEI	3.1269	41.7789	1.66967e-42
1633	17	34665195	Glyma.17G210700	ELT_QEI	3.1269	41.7789	1.66967e-42
1634	17	34665195	Glyma.17G210800	ELT_QEI	3.1269	41.7789	1.66967e-42	AT5G25360.1
1635	17	34665195	Glyma.17G210900	ELT_QEI	3.1269	41.7789	1.66967e-42
1636	17	34665195	Glyma.17G211000	ELT_QEI	3.1269	41.7789	1.66967e-42	AT2G25490.1	EIN3-binding F box protein 1
1637	17	34665195	Glyma.17G211100	ELT_QEI	3.1269	41.7789	1.66967e-42	AT4G32330.1	TPX2 (targeting protein for Xklp2) protein family
1638	17	34665195	Glyma.17G211200	ELT_QEI	3.1269	41.7789	1.66967e-42	AT4G32300.1	S-domain-2 5
1639	17	35022244	Glyma.17G212200	ELT_Q	0.4767	10.6589	2.19515e-11	AT2G45180.1	Bifunctional inhibitor/lipid-transfer protein/seed storage 2S albumin superfamily protein
1640	17	35022244	Glyma.17G212300	ELT_Q	0.4767	10.6589	2.19515e-11	AT5G25310.1	Exostosin family protein
1641	17	35022244	Glyma.17G212400	ELT_Q	0.4767	10.6589	2.19515e-11	AT4G32140.1	EamA-like transporter family
1642	17	35022244	Glyma.17G212500	ELT_Q	0.4767	10.6589	2.19515e-11	AT4G32120.1	Galactosyltransferase family protein
1643	17	35022244	Glyma.17G212600	ELT_Q	0.4767	10.6589	2.19515e-11	AT4G14750.1	IQ-domain 19
1644	17	35022244	Glyma.17G212700	ELT_Q	0.4767	10.6589	2.19515e-11	AT1G63470.1	AT hook motif DNA-binding family protein
1645	17	35022244	Glyma.17G212800	ELT_Q	0.4767	10.6589	2.19515e-11	AT5G23810.1	amino acid permease 7
1646	18	11870385	Glyma.18G105700	ELT_Q	0.4826	9.0164	9.63604e-10
1647	18	11870385	Glyma.18G105800	ELT_Q	0.4826	9.0164	9.63604e-10	AT3G58780.1	K-box region and MADS-box transcription factor family protein
1648	18	11870385	Glyma.18G105900	ELT_Q	0.4826	9.0164	9.63604e-10	AT3G58790.1	galacturonosyltransferase 15
1649	18	11870385	Glyma.18G106000	ELT_Q	0.4826	9.0164	9.63604e-10	AT2G26770.1	plectin-related
1650	18	11870385	Glyma.18G106100	ELT_Q	0.4826	9.0164	9.63604e-10	AT3G54850.1	plant U-box 14
1651	18	11870385	Glyma.18G106200	ELT_Q	0.4826	9.0164	9.63604e-10
1652	18	11870385	Glyma.18G106300	ELT_Q	0.4826	9.0164	9.63604e-10	AT1G78570.1	rhamnose biosynthesis 1
1653	18	11870385	Glyma.18G106400	ELT_Q	0.4826	9.0164	9.63604e-10	AT2G42840.1	protodermal factor 1
1654	18	11870385	Glyma.18G106500	ELT_Q	0.4826	9.0164	9.63604e-10	AT4G14130.1	xyloglucan endotransglucosylase/hydrolase 15
1655	18	11870385	Glyma.18G106600	ELT_Q	0.4826	9.0164	9.63604e-10	AT2G06541.1	TTF-type zinc finger protein with HAT dimerisation domain
1656	18	11870385	Glyma.18G106700	ELT_Q	0.4826	9.0164	9.63604e-10	AT3G58840.1	Tropomyosin-related
1657	18	11870385	Glyma.18G106800	ELT_Q	0.4826	9.0164	9.63604e-10	AT2G42880.1	MAP kinase 20
1658	18	11870385	Glyma.18G106900	ELT_Q	0.4826	9.0164	9.63604e-10	AT1G29400.1	MEI2-like protein 5
1659	18	11870385	Glyma.18G107000	ELT_Q	0.4826	9.0164	9.63604e-10	AT2G42910.1	Phosphoribosyltransferase family protein
1660	18	11870385	Glyma.18G107100	ELT_Q	0.4826	9.0164	9.63604e-10	AT1G06520.1	glycerol-3-phosphate acyltransferase 1
1661	18	11870385	Glyma.18G107200	ELT_Q	0.4826	9.0164	9.63604e-10	AT2G42900.1	Plant basic secretory protein (BSP) family protein
1662	18	11870385	Glyma.18G107300	ELT_Q	0.4826	9.0164	9.63604e-10	AT2G30933.1	Carbohydrate-binding X8 domain superfamily protein
1663	18	11870385	Glyma.18G107400	ELT_Q	0.4826	9.0164	9.63604e-10
1664	18	14964899/15002970	Glyma.18G119400	ELS_Q/ELT_Q	0.223	18.1626	6.88718e-19	AT1G14270.1	CAAX amino terminal protease family protein
1665	18	14964899/15002970	Glyma.18G119500	ELS_Q/ELT_Q	0.223	18.1626	6.88718e-19	AT1G05410.1	Protein of unknown function (DUF1423)
1666	18	14964899/15002970	Glyma.18G119600	ELS_Q/ELT_Q	0.223	18.1626	6.88718e-19	AT1G26850.1	S-adenosyl-L-methionine-dependent methyltransferases superfamily protein
1667	18	14964899/15002970	Glyma.18G119700	ELS_Q/ELT_Q	0.223	18.1626	6.88718e-19	AT5G37020.1	auxin response factor 8
1668	18	14964899/15002970	Glyma.18G119800	ELS_Q/ELT_Q	0.223	18.1626	6.88718e-19	AT1G09270.1	importin alpha isoform 4
1669	18	14964899/15002970	Glyma.18G119900	ELS_Q/ELT_Q	0.223	18.1626	6.88718e-19	AT2G01050.1	zinc ion binding;nucleic acid binding
1670	18	14964899/15002970	Glyma.18G120000	ELS_Q/ELT_Q	0.223	18.1626	6.88718e-19	AT1G14280.1	phytochrome kinase substrate 2
1671	18	14964899/15002970	Glyma.18G120100	ELS_Q/ELT_Q	0.223	18.1626	6.88718e-19	AT2G02910.1	Protein of unknown function (DUF616)
1672	18	14964899/15002970	Glyma.18G120200	ELS_Q/ELT_Q	0.223	18.1626	6.88718e-19	AT5G24090.1	chitinase A
1673	18	14964899/15002970	Glyma.18G120300	ELS_Q/ELT_Q	0.223	18.1626	6.88718e-19	AT1G26830.1	cullin 3
1674	18	18982746	Glyma.18G133100	ELT_QEI	0.3146	4.4263	3.7484e-05	AT1G70210.1	CYCLIN D1;1
1675	18	18982746	Glyma.18G133200	ELT_QEI	0.3146	4.4263	3.7484e-05	AT1G10522.1
1676	18	18982746	Glyma.18G133300	ELT_QEI	0.3146	4.4263	3.7484e-05	AT1G60010.1
1677	18	18982746	Glyma.18G133400	ELT_QEI	0.3146	4.4263	3.7484e-05	AT3G11400.1	eukaryotic translation initiation factor 3G1
1678	18	18982746	Glyma.18G133500	ELT_QEI	0.3146	4.4263	3.7484e-05	AT5G62890.1	Xanthine/uracil permease family protein
1679	18	18982746	Glyma.18G133600	ELT_QEI	0.3146	4.4263	3.7484e-05
1680	18	18982746	Glyma.18G133700	ELT_QEI	0.3146	4.4263	3.7484e-05
1681	18	18982746	Glyma.18G133800	ELT_QEI	0.3146	4.4263	3.7484e-05	AT1G24050.1	RNA-processing, Lsm domain
1682	18	18982746	Glyma.18G133900	ELT_QEI	0.3146	4.4263	3.7484e-05	AT5G28530.1	FAR1-related sequence 10
1683	18	18982746	Glyma.18G134000	ELT_QEI	0.3146	4.4263	3.7484e-05	AT1G64940.1	cytochrome P450, family 87, subfamily A, polypeptide 6
1684	18	19911556	Glyma.18G135500	ELS_Q	0.4075	7.4921	3.22222e-08	AT2G29890.3	villin-like 1
1685	18	19911556	Glyma.18G135600	ELS_Q	0.4075	7.4921	3.22222e-08	AT2G46860.1	pyrophosphorylase 3
1686	18	19911556	Glyma.18G135700	ELS_Q	0.4075	7.4921	3.22222e-08	AT2G22370.1
1687	18	19911556	Glyma.18G135800	ELS_Q	0.4075	7.4921	3.22222e-08	AT1G70280.2	NHL domain-containing protein
1688	18	19911556	Glyma.18G135900	ELS_Q	0.4075	7.4921	3.22222e-08
1689	18	19911556	Glyma.18G136000	ELS_Q	0.4075	7.4921	3.22222e-08	AT4G29900.1	autoinhibited Ca(2+)-ATPase 10
1690	18	19911556	Glyma.18G136100	ELS_Q	0.4075	7.4921	3.22222e-08	AT4G05160.1	AMP-dependent synthetase and ligase family protein
1691	18	19911556	Glyma.18G136200	ELS_Q	0.4075	7.4921	3.22222e-08	AT1G60140.1	trehalose phosphate synthase
1692	18	19911556	Glyma.18G136300	ELS_Q	0.4075	7.4921	3.22222e-08
1693	18	19911556	Glyma.18G136400	ELS_Q	0.4075	7.4921	3.22222e-08	AT1G19260.1	TTF-type zinc finger protein with HAT dimerisation domain
1694	18	19911556	Glyma.18G136500	ELS_Q	0.4075	7.4921	3.22222e-08	AT1G70300.1	K+ uptake permease 6
1695	18	19911556	Glyma.18G136600	ELS_Q	0.4075	7.4921	3.22222e-08	AT1G60160.1	Potassium transporter family protein
1696	18	19911556	Glyma.18G136700	ELS_Q	0.4075	7.4921	3.22222e-08	AT1G77380.1	amino acid permease 3
1697	18	19911556	Glyma.18G136800	ELS_Q	0.4075	7.4921	3.22222e-08	AT5G09400.1	K+ uptake permease 7
1698	18	19911556	Glyma.18G136900	ELS_Q	0.4075	7.4921	3.22222e-08	AT1G23860.1	RS-containing zinc finger protein 21
1699	18	19911556	Glyma.18G137000	ELS_Q	0.4075	7.4921	3.22222e-08	AT1G23850.1
1700	18	19911556	Glyma.18G137100	ELS_Q	0.4075	7.4921	3.22222e-08	AT1G23820.1	spermidine synthase 1
1701	18	19911556	Glyma.18G137200	ELS_Q	0.4075	7.4921	3.22222e-08	AT3G07820.1	Pectin lyase-like superfamily protein
1702	18	35084621	Glyma.18G156900	ELT_Q	0.3876	6.0087	9.80748e-07	AT3G07340.1	basic helix-loop-helix (bHLH) DNA-binding superfamily protein
1703	18	35084621	Glyma.18G157000	ELT_Q	0.3876	6.0087	9.80748e-07	AT5G57330.1	Galactose mutarotase-like superfamily protein
1704	18	35084621	Glyma.18G157100	ELT_Q	0.3876	6.0087	9.80748e-07	AT5G17000.1	Zinc-binding dehydrogenase family protein
1705	18	35084621	Glyma.18G157200	ELT_Q	0.3876	6.0087	9.80748e-07	AT1G09050.1
1706	18	35084621	Glyma.18G157300	ELT_Q	0.3876	6.0087	9.80748e-07	AT5G59240.1	Ribosomal protein S8e family protein
1707	18	35084621	Glyma.18G157400	ELT_Q	0.3876	6.0087	9.80748e-07	AT2G27120.1	DNA polymerase epsilon catalytic subunit
1708	18	35084621	Glyma.18G157500	ELT_Q	0.3876	6.0087	9.80748e-07	AT2G20420.1	ATP citrate lyase (ACL) family protein
1709	18	35084621	Glyma.18G157600	ELT_Q	0.3876	6.0087	9.80748e-07	AT1G51340.1	MATE efflux family protein
1710	18	35084621	Glyma.18G157700	ELT_Q	0.3876	6.0087	9.80748e-07	AT5G41980.1
1711	18	35084621	Glyma.18G157800	ELT_Q	0.3876	6.0087	9.80748e-07	AT2G23240.1	Plant EC metallothionein-like protein, family 15
1712	18	35084621	Glyma.18G157900	ELT_Q	0.3876	6.0087	9.80748e-07	AT2G29880.1
1713	18	35084621	Glyma.18G158000	ELT_Q	0.3876	6.0087	9.80748e-07	AT3G17450.1	hAT dimerisation domain-containing protein
1714	18	35084621	Glyma.18G158100	ELT_Q	0.3876	6.0087	9.80748e-07	AT3G25230.1	rotamase FKBP 1
1715	18	35084621	Glyma.18G158200	ELT_Q	0.3876	6.0087	9.80748e-07	AT3G07320.1	O-Glycosyl hydrolases family 17 protein
1716	18	35084621	Glyma.18G158300	ELT_Q	0.3876	6.0087	9.80748e-07	AT3G07310.1	Protein of unknown function (DUF760)
1717	18	35084621	Glyma.18G158400	ELT_Q	0.3876	6.0087	9.80748e-07	AT3G13080.1	multidrug resistance-associated protein 3
1718	18	35084621	Glyma.18G158500	ELT_Q	0.3876	6.0087	9.80748e-07	AT4G36040.1	Chaperone DnaJ-domain superfamily protein
1719	18	43102506	Glyma.18G178800	ELS_QEI	0.8283	12.862	1.37552e-13	AT1G09270.1	importin alpha isoform 4
1720	18	43102506	Glyma.18G178900	ELS_QEI	0.8283	12.862	1.37552e-13
1721	18	43102506	Glyma.18G179000	ELS_QEI	0.8283	12.862	1.37552e-13	AT3G62150.1	P-glycoprotein 21
1722	18	43102506	Glyma.18G179100	ELS_QEI	0.8283	12.862	1.37552e-13	AT1G52360.2	Coatomer, beta\' subunit
1723	18	43102506	Glyma.18G179200	ELS_QEI	0.8283	12.862	1.37552e-13	AT2G31130.1
1724	18	43102506	Glyma.18G179300	ELS_QEI	0.8283	12.862	1.37552e-13	AT2G28610.1	Homeodomain-like superfamily protein
1725	18	43102506	Glyma.18G179400	ELS_QEI	0.8283	12.862	1.37552e-13	AT4G38180.1	FAR1-related sequence 5
1726	18	43102506	Glyma.18G179500	ELS_QEI	0.8283	12.862	1.37552e-13	AT5G02410.1	DIE2/ALG10 family
1727	18	43102506	Glyma.18G179600	ELS_QEI	0.8283	12.862	1.37552e-13	AT4G07950.1	DNA-directed RNA polymerase, subunit M, archaeal
1728	18	43102506	Glyma.18G179700	ELS_QEI	0.8283	12.862	1.37552e-13	AT1G51980.1	Insulinase (Peptidase family M16) protein
1729	18	43102506	Glyma.18G179900	ELS_QEI	0.8283	12.862	1.37552e-13
1730	18	44381201	Glyma.18G183600	ELS_QEI	2.1064	31.9492	1.12718e-32	AT2G37678.1	far-red elongated hypocotyl 1
1731	18	44381201	Glyma.18G183700	ELS_QEI	2.1064	31.9492	1.12718e-32	AT5G60020.1	laccase 17
1732	18	44381201	Glyma.18G183800	ELS_QEI	2.1064	31.9492	1.12718e-32	AT5G02170.2	Transmembrane amino acid transporter family protein
1733	18	44381201	Glyma.18G183900	ELS_QEI	2.1064	31.9492	1.12718e-32	AT1G65660.1	Pre-mRNA splicing Prp18-interacting factor
1734	18	44381201	Glyma.18G184000	ELS_QEI	2.1064	31.9492	1.12718e-32	AT5G02160.1
1735	18	44381201	Glyma.18G184100	ELS_QEI	2.1064	31.9492	1.12718e-32	AT5G35700.1	fimbrin-like protein 2
1736	18	44381201	Glyma.18G184200	ELS_QEI	2.1064	31.9492	1.12718e-32	AT2G39720.1	RING-H2 finger C2A
1737	18	44381201	Glyma.18G184300	ELS_QEI	2.1064	31.9492	1.12718e-32	AT1G57590.1	Pectinacetylesterase family protein
1738	18	44381201	Glyma.18G184400	ELS_QEI	2.1064	31.9492	1.12718e-32	AT2G25737.1	Sulfite exporter TauE/SafE family protein
1739	18	44381201	Glyma.18G184500	ELS_QEI	2.1064	31.9492	1.12718e-32	AT4G23980.1	auxin response factor 9
1740	18	44381201	Glyma.18G184600	ELS_QEI	2.1064	31.9492	1.12718e-32	AT3G21420.1	2-oxoglutarate (2OG) and Fe(II)-dependent oxygenase superfamily protein
1741	18	44381201	Glyma.18G184700	ELS_QEI	2.1064	31.9492	1.12718e-32	AT4G25300.1	2-oxoglutarate (2OG) and Fe(II)-dependent oxygenase superfamily protein
1742	18	44381201	Glyma.18G184800	ELS_QEI	2.1064	31.9492	1.12718e-32	AT3G21420.1	2-oxoglutarate (2OG) and Fe(II)-dependent oxygenase superfamily protein
1743	18	44381201	Glyma.18G184900	ELS_QEI	2.1064	31.9492	1.12718e-32	AT3G21420.1	2-oxoglutarate (2OG) and Fe(II)-dependent oxygenase superfamily protein
1744	18	44381201	Glyma.18G185000	ELS_QEI	2.1064	31.9492	1.12718e-32	AT1G19260.1	TTF-type zinc finger protein with HAT dimerisation domain
1745	18	44381201	Glyma.18G185100	ELS_QEI	2.1064	31.9492	1.12718e-32	AT5G02140.1	Pathogenesis-related thaumatin superfamily protein
1746	18	44381201	Glyma.18G185200	ELS_QEI	2.1064	31.9492	1.12718e-32	AT5G02130.1	Tetratricopeptide repeat (TPR)-like superfamily protein
1747	18	44381201	Glyma.18G185300	ELS_QEI	2.1064	31.9492	1.12718e-32	AT5G02120.1	one helix protein
1748	18	44381201	Glyma.18G185400	ELS_QEI	2.1064	31.9492	1.12718e-32	AT2G37710.1	receptor lectin kinase
1749	18	44381201	Glyma.18G185500	ELS_QEI	2.1064	31.9492	1.12718e-32	AT3G55550.1	Concanavalin A-like lectin protein kinase family protein
1750	18	44381201	Glyma.18G185600	ELS_QEI	2.1064	31.9492	1.12718e-32	AT3G23160.1	Protein of unknown function (DUF668)
1751	18	44381201	Glyma.18G185700	ELS_QEI	2.1064	31.9492	1.12718e-32
1752	18	44381201	Glyma.18G185800	ELS_QEI	2.1064	31.9492	1.12718e-32	AT2G37730.1	Protein of unknown function (DUF604)
1753	18	53974389	Glyma.18G253300	ELS_Q	0.6377	11.1061	7.8396e-12	AT4G25950.1	vacuolar ATP synthase G3
1754	18	53974389	Glyma.18G253400	ELS_Q	0.6377	11.1061	7.8396e-12	AT2G44900.1	ARABIDILLO-1
1755	18	53974389	Glyma.18G253500	ELS_Q	0.6377	11.1061	7.8396e-12	AT2G32235.1
1756	18	53974389	Glyma.18G253600	ELS_Q	0.6377	11.1061	7.8396e-12	AT1G05940.1	cationic amino acid transporter 9
1757	18	53974389	Glyma.18G253700	ELS_Q	0.6377	11.1061	7.8396e-12	AT3G60380.1
1758	18	53974389	Glyma.18G253800	ELS_Q	0.6377	11.1061	7.8396e-12	AT3G60390.1	homeobox-leucine zipper protein 3
1759	18	53974389	Glyma.18G253900	ELS_Q	0.6377	11.1061	7.8396e-12	AT5G61330.1	rRNA processing protein-related
1760	18	53974389/54102295	Glyma.18G254000	ELS_Q/ELT_QEI	0.6377	11.1061	7.8396e-12	AT4G08850.1	Leucine-rich repeat receptor-like protein kinase family protein
1761	18	53974389/54102295	Glyma.18G254100	ELS_Q/ELT_QEI	0.6377	11.1061	7.8396e-12	AT5G40010.1	AAA-ATPase 1
1762	18	53974389/54102295	Glyma.18G254200	ELS_Q/ELT_QEI	0.6377	11.1061	7.8396e-12	AT5G40010.1	AAA-ATPase 1
1763	18	53974389/54102295	Glyma.18G254300	ELS_Q/ELT_QEI	0.6377	11.1061	7.8396e-12	AT4G08850.1	Leucine-rich repeat receptor-like protein kinase family protein
1764	18	53974389/54102295	Glyma.18G254400	ELS_Q/ELT_QEI	0.6377	11.1061	7.8396e-12	AT4G08850.1	Leucine-rich repeat receptor-like protein kinase family protein
1765	18	53974389/54102295	Glyma.18G254500	ELS_Q/ELT_QEI	0.6377	11.1061	7.8396e-12	AT4G08850.1	Leucine-rich repeat receptor-like protein kinase family protein
1766	18	53974389/54102295	Glyma.18G254600	ELS_Q/ELT_QEI	0.6377	11.1061	7.8396e-12	AT4G08850.1	Leucine-rich repeat receptor-like protein kinase family protein
1767	18	53974389/54102295	Glyma.18G254700	ELS_Q/ELT_QEI	0.6377	11.1061	7.8396e-12	AT4G08850.1	Leucine-rich repeat receptor-like protein kinase family protein
1768	18	53974389	Glyma.18G254800	ELS_Q	0.6377	11.1061	7.8396e-12	AT5G33370.1	GDSL-like Lipase/Acylhydrolase superfamily protein
1769	18	53974389	Glyma.18G254900	ELS_Q	0.6377	11.1061	7.8396e-12	AT5G39990.1	Core-2/I-branching beta-1,6-N-acetylglucosaminyltransferase family protein
1770	18	53974389	Glyma.18G255000	ELS_Q	0.6377	11.1061	7.8396e-12	AT5G15070.1	Phosphoglycerate mutase-like family protein
1771	18	53974389	Glyma.18G255100	ELS_Q	0.6377	11.1061	7.8396e-12	AT2G27580.1	A20/AN1-like zinc finger family protein
1772	18	53974389	Glyma.18G255200	ELS_Q	0.6377	11.1061	7.8396e-12	AT5G39950.1	thioredoxin 2
1773	18	53974389	Glyma.18G255300	ELS_Q	0.6377	11.1061	7.8396e-12	AT1G45145.1	thioredoxin H-type 5
1774	18	53974389	Glyma.18G255400	ELS_Q	0.6377	11.1061	7.8396e-12	AT5G39950.1	thioredoxin 2
1775	18	53974389	Glyma.18G255500	ELS_Q	0.6377	11.1061	7.8396e-12
1776	18	53974389	Glyma.18G255600	ELS_Q	0.6377	11.1061	7.8396e-12	AT5G15080.1	Protein kinase superfamily protein
1777	18	53974389	Glyma.18G255700	ELS_Q	0.6377	11.1061	7.8396e-12	AT3G01280.1	voltage dependent anion channel 1
1778	18	53974389	Glyma.18G255800	ELS_Q	0.6377	11.1061	7.8396e-12	AT1G73590.1	Auxin efflux carrier family protein
1779	18	53974389	Glyma.18G255900	ELS_Q	0.6377	11.1061	7.8396e-12	AT5G15110.1	Pectate lyase family protein
1780	18	55659675	Glyma.18G273600	ELT_Q	0.4348	7.6605	2.18688e-08	AT5G60910.1	AGAMOUS-like 8
1781	18	55659675	Glyma.18G273700	ELT_Q	0.4348	7.6605	2.18688e-08	AT3G02300.1	Regulator of chromosome condensation (RCC1) family protein
1782	18	55659675	Glyma.18G273800	ELT_Q	0.4348	7.6605	2.18688e-08	AT5G28680.1	Malectin/receptor-like protein kinase family protein
1783	18	55659675	Glyma.18G273900	ELT_Q	0.4348	7.6605	2.18688e-08	AT5G38900.1	Thioredoxin superfamily protein
1784	18	55659675	Glyma.18G274000	ELT_Q	0.4348	7.6605	2.18688e-08	AT5G38895.3	RING/U-box superfamily protein
1785	18	55659675	Glyma.18G274100	ELT_Q	0.4348	7.6605	2.18688e-08	AT5G38880.1
1786	18	55659675	Glyma.18G274200	ELT_Q	0.4348	7.6605	2.18688e-08	AT5G15780.1	Pollen Ole e 1 allergen and extensin family protein
1787	18	55659675	Glyma.18G274300	ELT_Q	0.4348	7.6605	2.18688e-08
1788	18	55659675	Glyma.18G274400	ELT_Q	0.4348	7.6605	2.18688e-08	AT2G36780.1	UDP-Glycosyltransferase superfamily protein
1789	18	55659675	Glyma.18G274500	ELT_Q	0.4348	7.6605	2.18688e-08	AT3G06240.1	F-box family protein
1790	18	55659675	Glyma.18G274600	ELT_Q	0.4348	7.6605	2.18688e-08
1791	18	55659675	Glyma.18G274700	ELT_Q	0.4348	7.6605	2.18688e-08	AT3G06240.1	F-box family protein
1792	18	55659675	Glyma.18G274800	ELT_Q	0.4348	7.6605	2.18688e-08	AT3G06240.1	F-box family protein
1793	18	55659675	Glyma.18G274900	ELT_Q	0.4348	7.6605	2.18688e-08	AT3G23880.1	F-box and associated interaction domains-containing protein
1794	18	55659675	Glyma.18G275000	ELT_Q	0.4348	7.6605	2.18688e-08	AT3G46790.1	Tetratricopeptide repeat (TPR)-like superfamily protein
1795	18	55659675	Glyma.18G275100	ELT_Q	0.4348	7.6605	2.18688e-08	AT3G49180.1	Transducin/WD40 repeat-like superfamily protein
1796	18	55659675	Glyma.18G275200	ELT_Q	0.4348	7.6605	2.18688e-08	AT3G02260.1	auxin transport protein (BIG)
1797	18	55659675	Glyma.18G275300	ELT_Q	0.4348	7.6605	2.18688e-08	AT5G15740.1	O-fucosyltransferase family protein
1798	18	55659675	Glyma.18G275400	ELT_Q	0.4348	7.6605	2.18688e-08	AT1G69010.1	BES1-interacting Myc-like protein 2
1799	18	55659675	Glyma.18G275500	ELT_Q	0.4348	7.6605	2.18688e-08	AT3G30300.1	O-fucosyltransferase family protein
1800	18	55659675	Glyma.18G275600	ELT_Q	0.4348	7.6605	2.18688e-08	AT2G03890.1	phosphoinositide 4-kinase gamma 7
1801	18	55659675	Glyma.18G275700	ELT_Q	0.4348	7.6605	2.18688e-08	AT5G15730.1	Protein kinase superfamily protein
1802	19	409042	Glyma.19G004700	ELT_QEI	2.8673	38.4865	3.2732e-39	AT3G27670.1	ARM repeat superfamily protein
1803	19	409042	Glyma.19G004800	ELT_QEI	2.8673	38.4865	3.2732e-39	AT3G01570.1	Oleosin family protein
1804	19	409042	Glyma.19G004900	ELT_QEI	2.8673	38.4865	3.2732e-39	AT3G27650.1	LOB domain-containing protein 25
1805	19	409042	Glyma.19G005000	ELT_QEI	2.8673	38.4865	3.2732e-39	AT1G55270.1	Galactose oxidase/kelch repeat superfamily protein
1806	19	409042	Glyma.19G005100	ELT_QEI	2.8673	38.4865	3.2732e-39	AT5G14590.1	Isocitrate/isopropylmalate dehydrogenase family protein
1807	19	409042	Glyma.19G005200	ELT_QEI	2.8673	38.4865	3.2732e-39	AT3G27640.1	Transducin/WD40 repeat-like superfamily protein
1808	19	557643	Glyma.19G006000	ELS_Q/ELT_Q	0.7001	46.9099	1.23537e-47	AT5G14610.2	DEAD box RNA helicase family protein
1809	19	557643	Glyma.19G006100	ELS_Q/ELT_Q	0.7001	46.9099	1.23537e-47	AT5G14620.1	domains rearranged methyltransferase 2
1810	19	5968359	Glyma.19G039800	ELS_Q	0.4391	7.1673	6.80687e-08	AT3G55770.6	GATA type zinc finger transcription factor family protein
1811	19	5968359	Glyma.19G039900	ELS_Q	0.4391	7.1673	6.80687e-08
1812	19	5968359	Glyma.19G040000	ELS_Q	0.4391	7.1673	6.80687e-08	AT5G38760.1	Late embryogenesis abundant protein (LEA) family protein
1813	19	5968359	Glyma.19G040100	ELS_Q	0.4391	7.1673	6.80687e-08	AT3G02460.1	Ypt/Rab-GAP domain of gyp1p superfamily protein
1814	19	5968359	Glyma.19G040200	ELS_Q	0.4391	7.1673	6.80687e-08	AT3G02450.1	cell division protein ftsH, putative
1815	19	5968359	Glyma.19G040300	ELS_Q	0.4391	7.1673	6.80687e-08	AT3G04030.3	Homeodomain-like superfamily protein
1816	19	5968359	Glyma.19G040400	ELS_Q	0.4391	7.1673	6.80687e-08	AT4G24400.2	CBL-interacting protein kinase 8
1817	19	5968359	Glyma.19G040500	ELS_Q	0.4391	7.1673	6.80687e-08	AT1G16710.1	histone acetyltransferase of the CBP family 12
1818	19	5968359	Glyma.19G040600	ELS_Q	0.4391	7.1673	6.80687e-08	AT1G79000.2	histone acetyltransferase of the CBP family 1
1819	19	5968359	Glyma.19G040700	ELS_Q	0.4391	7.1673	6.80687e-08	AT1G16710.2	histone acetyltransferase of the CBP family 12
1820	19	5968359	Glyma.19G040800	ELS_Q	0.4391	7.1673	6.80687e-08	AT5G38600.1	Proline-rich spliceosome-associated (PSP) family protein / zinc knuckle (CCHC-type) family protein
1821	19	5968359	Glyma.19G040900	ELS_Q	0.4391	7.1673	6.80687e-08	AT5G15860.1	prenylcysteine methylesterase
1822	19	5968359	Glyma.19G041000	ELS_Q	0.4391	7.1673	6.80687e-08
1823	19	5968359	Glyma.19G041100	ELS_Q	0.4391	7.1673	6.80687e-08	AT5G17450.1	Heavy metal transport/detoxification superfamily protein
1824	19	11036437	Glyma.19G057300	ELT_Q	0.4322	6.6263	2.36579e-07	AT2G23180.1	cytochrome P450, family 96, subfamily A, polypeptide 1
1825	19	11036437	Glyma.19G057400	ELT_Q	0.4322	6.6263	2.36579e-07
1826	19	11036437	Glyma.19G057500	ELT_Q	0.4322	6.6263	2.36579e-07	AT1G76690.1	12-oxophytodienoate reductase 2
1827	19	11036437	Glyma.19G057600	ELT_Q	0.4322	6.6263	2.36579e-07	AT1G09590.1	Translation protein SH3-like family protein
1828	19	11036437	Glyma.19G057700	ELT_Q	0.4322	6.6263	2.36579e-07	AT5G39190.2	germin-like protein 2
1829	19	11036437	Glyma.19G057800	ELT_Q	0.4322	6.6263	2.36579e-07	AT3G43700.1	BTB-POZ and MATH domain 6
1830	19	11036437	Glyma.19G057900	ELT_Q	0.4322	6.6263	2.36579e-07	AT1G05830.1	trithorax-like protein 2
1831	19	11036437/11405735	Glyma.19G058000	ELT_Q/ELS_Q	0.4322	6.6263	2.36579e-07	AT3G03740.1	BTB-POZ and MATH domain 4
1832	19	11036437/11405735	Glyma.19G058100	ELT_Q/ELS_Q	0.4322	6.6263	2.36579e-07	AT1G05830.1	trithorax-like protein 2
1833	19	11036437/11405735	Glyma.19G058200	ELT_Q/ELS_Q	0.4322	6.6263	2.36579e-07	AT3G03740.1	BTB-POZ and MATH domain 4
1834	19	11036437/11405735	Glyma.19G058300	ELT_Q/ELS_Q	0.4322	6.6263	2.36579e-07	AT3G03740.1	BTB-POZ and MATH domain 4
1835	19	11036437/11405735	Glyma.19G058400	ELT_Q/ELS_Q	0.4322	6.6263	2.36579e-07	AT1G05830.1	trithorax-like protein 2
1836	19	11405735	Glyma.19G058500	ELS_Q	0.1931	3.5631	5.10732e-05	AT3G03740.1	BTB-POZ and MATH domain 4
1837	19	11405735	Glyma.19G058600	ELS_Q	0.1931	3.5631	5.10732e-05	AT3G03740.1	BTB-POZ and MATH domain 4
1838	19	11405735	Glyma.19G058700	ELS_Q	0.1931	3.5631	5.10732e-05	AT3G03740.1	BTB-POZ and MATH domain 4
1839	19	11405735	Glyma.19G058800	ELS_Q	0.1931	3.5631	5.10732e-05	AT1G05830.1	trithorax-like protein 2
1840	19	11405735	Glyma.19G058900	ELS_Q	0.1931	3.5631	5.10732e-05	AT3G05950.1	RmlC-like cupins superfamily protein
1841	19	11405735	Glyma.19G059000	ELS_Q	0.1931	3.5631	5.10732e-05	AT3G05950.1	RmlC-like cupins superfamily protein
1842	19	11405735	Glyma.19G059100	ELS_Q	0.1931	3.5631	5.10732e-05	AT3G05950.1	RmlC-like cupins superfamily protein
1843	19	11405735	Glyma.19G059200	ELS_Q	0.1931	3.5631	5.10732e-05	AT3G05950.1	RmlC-like cupins superfamily protein
1844	19	11405735	Glyma.19G059300	ELS_Q	0.1931	3.5631	5.10732e-05	AT3G03740.1	BTB-POZ and MATH domain 4
1845	19	11405735	Glyma.19G059400	ELS_Q	0.1931	3.5631	5.10732e-05	AT4G11030.1	AMP-dependent synthetase and ligase family protein
1846	19	11405735	Glyma.19G059500	ELS_Q	0.1931	3.5631	5.10732e-05	AT4G32660.1	Protein kinase superfamily protein
1847	19	11405735	Glyma.19G059600	ELS_Q	0.1931	3.5631	5.10732e-05	AT5G37020.2	auxin response factor 8
1848	19	24393669	Glyma.19G071300	ELS_QEI	0.463	7.2398	5.76059e-08	AT3G27160.1	Ribosomal protein S21 family protein
1849	19	24393669	Glyma.19G071400	ELS_QEI	0.463	7.2398	5.76059e-08
1850	19	24393669	Glyma.19G071500	ELS_QEI	0.463	7.2398	5.76059e-08	AT5G14170.1	SWIB/MDM2 domain superfamily protein
1851	19	24393669	Glyma.19G071600	ELS_QEI	0.463	7.2398	5.76059e-08	AT3G27120.1	P-loop containing nucleoside triphosphate hydrolases superfamily protein
1852	19	24393669	Glyma.19G071700	ELS_QEI	0.463	7.2398	5.76059e-08	AT5G02740.1	Ribosomal protein S24e family protein
1853	19	29518891	Glyma.19G081100	ELS_Q	0.9119	14.5506	2.81793e-15	AT1G08080.1	alpha carbonic anhydrase 7
1854	19	29518891	Glyma.19G081200	ELS_Q	0.9119	14.5506	2.81793e-15	AT4G08850.1	Leucine-rich repeat receptor-like protein kinase family protein
1855	19	29518891	Glyma.19G081300	ELS_Q	0.9119	14.5506	2.81793e-15	AT1G04200.1
1856	19	29518891	Glyma.19G081400	ELS_Q	0.9119	14.5506	2.81793e-15	AT5G40720.1	Domain of unknown function (DUF23)
1857	19	29518891	Glyma.19G081500	ELS_Q	0.9119	14.5506	2.81793e-15	AT4G12560.1	F-box and associated interaction domains-containing protein
1858	19	29518891	Glyma.19G081600	ELS_Q	0.9119	14.5506	2.81793e-15	AT5G19850.1	alpha/beta-Hydrolases superfamily protein
1859	19	29518891	Glyma.19G081700	ELS_Q	0.9119	14.5506	2.81793e-15	AT4G12560.1	F-box and associated interaction domains-containing protein
1860	19	29518891	Glyma.19G081800	ELS_Q	0.9119	14.5506	2.81793e-15	AT1G04830.2	Ypt/Rab-GAP domain of gyp1p superfamily protein
1861	19	29518891	Glyma.19G081900	ELS_Q	0.9119	14.5506	2.81793e-15
1862	19	29518891	Glyma.19G082000	ELS_Q	0.9119	14.5506	2.81793e-15	AT3G27330.1	zinc finger (C3HC4-type RING finger) family protein
1863	19	29518891	Glyma.19G082100	ELS_Q	0.9119	14.5506	2.81793e-15	AT3G27325.2	hydrolases, acting on ester bonds
1864	19	30712384	Glyma.19G085400	ELS_Q	0.4021	92.8223	1.51762e-93
1865	19	30712384	Glyma.19G085500	ELS_Q	0.4021	92.8223	1.51762e-93	AT3G14460.1	LRR and NB-ARC domains-containing disease resistance protein
1866	19	30712384	Glyma.19G085600	ELS_Q	0.4021	92.8223	1.51762e-93	AT3G14460.1	LRR and NB-ARC domains-containing disease resistance protein
1867	19	30712384	Glyma.19G085700	ELS_Q	0.4021	92.8223	1.51762e-93	AT1G17950.1	myb domain protein 52
1868	19	30712384	Glyma.19G085800	ELS_Q	0.4021	92.8223	1.51762e-93	AT4G35290.1	glutamate receptor 2
1869	19	30712384	Glyma.19G085900	ELS_Q	0.4021	92.8223	1.51762e-93	AT3G14460.1	LRR and NB-ARC domains-containing disease resistance protein
1870	19	30712384	Glyma.19G086000	ELS_Q	0.4021	92.8223	1.51762e-93	AT5G39160.3	RmlC-like cupins superfamily protein
1871	19	30712384	Glyma.19G086100	ELS_Q	0.4021	92.8223	1.51762e-93	AT3G05950.1	RmlC-like cupins superfamily protein
1872	19	30712384	Glyma.19G086200	ELS_Q	0.4021	92.8223	1.51762e-93	AT3G05950.1	RmlC-like cupins superfamily protein
1873	19	30712384	Glyma.19G086300	ELS_Q	0.4021	92.8223	1.51762e-93	AT4G33270.1	Transducin family protein / WD-40 repeat family protein
1874	19	30712384	Glyma.19G086400	ELS_Q	0.4021	92.8223	1.51762e-93	AT3G05950.1	RmlC-like cupins superfamily protein
1875	19	30712384	Glyma.19G086500	ELS_Q	0.4021	92.8223	1.51762e-93	AT5G39160.1	RmlC-like cupins superfamily protein
1876	19	30712384	Glyma.19G086600	ELS_Q	0.4021	92.8223	1.51762e-93	AT3G01780.1	ARM repeat superfamily protein
1877	19	30712384	Glyma.19G086700	ELS_Q	0.4021	92.8223	1.51762e-93	AT5G14230.1
1878	19	34852327	Glyma.19G100800	ELS_Q	0.2779	10.768	1.70773e-11	AT2G02220.1	phytosulfokin receptor 1
1879	19	34852327	Glyma.19G100900	ELS_Q	0.2779	10.768	1.70773e-11	AT3G26790.1	AP2/B3-like transcriptional factor family protein
1880	19	34852327	Glyma.19G101000	ELS_Q	0.2779	10.768	1.70773e-11	AT1G12840.1	vacuolar ATP synthase subunit C (VATC) / V-ATPase C subunit / vacuolar proton pump C subunit (DET3)
1881	19	34852327	Glyma.19G101100	ELS_Q	0.2779	10.768	1.70773e-11	AT5G14040.1	phosphate transporter 3;1
1882	19	34852327	Glyma.19G101200	ELS_Q	0.2779	10.768	1.70773e-11	AT1G04300.2	TRAF-like superfamily protein
1883	19	34852327	Glyma.19G101300	ELS_Q	0.2779	10.768	1.70773e-11	AT2G47920.1	Kinase interacting (KIP1-like) family protein
1884	19	34852327	Glyma.19G101400	ELS_Q	0.2779	10.768	1.70773e-11	AT5G52882.1	P-loop containing nucleoside triphosphate hydrolases superfamily protein
1885	19	34852327	Glyma.19G101500	ELS_Q	0.2779	10.768	1.70773e-11	AT1G12845.1
1886	19	34852327	Glyma.19G101600	ELS_Q	0.2779	10.768	1.70773e-11	AT2G13540.1	ARM repeat superfamily protein
1887	19	34852327	Glyma.19G101700	ELS_Q	0.2779	10.768	1.70773e-11	AT5G05800.1
1888	19	41387696/41426323	Glyma.19G153700	ELS_Q/ELT_Q	0.3873	6.1432	7.19433e-07	AT1G03310.1	debranching enzyme 1
1889	19	41387696/41426323	Glyma.19G153800	ELS_Q/ELT_Q	0.3873	6.1432	7.19433e-07	AT4G02900.1	ERD (early-responsive to dehydration stress) family protein
1890	19	41387696/41426323	Glyma.19G153900	ELS_Q/ELT_Q	0.3873	6.1432	7.19433e-07	AT2G48160.1	Tudor/PWWP/MBT domain-containing protein
1891	19	41387696/41426323	Glyma.19G154000	ELS_Q/ELT_Q	0.3873	6.1432	7.19433e-07
1892	19	41387696/41426323	Glyma.19G154100	ELS_Q/ELT_Q	0.3873	6.1432	7.19433e-07	AT2G48150.1	glutathione peroxidase 4
1893	19	41387696/41426323	Glyma.19G154200	ELS_Q/ELT_Q	0.3873	6.1432	7.19433e-07	AT1G03270.1	CBS domain-containing protein with a domain of unknown function (DUF21)
1894	19	41387696/41426323	Glyma.19G154300	ELS_Q/ELT_Q	0.3873	6.1432	7.19433e-07	AT3G63095.1	Tetratricopeptide repeat (TPR)-like superfamily protein
1895	19	41387696/41426323	Glyma.19G154400	ELS_Q/ELT_Q	0.3873	6.1432	7.19433e-07	AT3G63110.1	isopentenyltransferase 3
1896	19	41387696/41426323	Glyma.19G154500	ELS_Q/ELT_Q	0.3873	6.1432	7.19433e-07	AT3G09100.2	mRNA capping enzyme family protein
1897	19	41387696/41426323	Glyma.19G154600	ELS_Q/ELT_Q	0.3873	6.1432	7.19433e-07	AT4G02840.1	Small nuclear ribonucleoprotein family protein
1898	19	41387696/41426323	Glyma.19G154700	ELS_Q/ELT_Q	0.3873	6.1432	7.19433e-07	AT3G52420.1	outer envelope membrane protein 7
1899	19	41387696/41426323	Glyma.19G154800	ELS_Q/ELT_Q	0.3873	6.1432	7.19433e-07	AT2G27310.1	F-box family protein
1900	19	41387696/41426323	Glyma.19G154900	ELS_Q/ELT_Q	0.3873	6.1432	7.19433e-07	AT3G06080.2	Plant protein of unknown function (DUF828)
1901	20	1448703	Glyma.20G015500	ELS_Q	0.2999	4.7961	1.59971e-05	AT3G54470.1	uridine 5\'-monophosphate synthase / UMP synthase (PYRE-F) (UMPS)
1902	20	1448703	Glyma.20G015600	ELS_Q	0.2999	4.7961	1.59971e-05	AT1G15000.1	serine carboxypeptidase-like 50
1903	20	1448703	Glyma.20G015700	ELS_Q	0.2999	4.7961	1.59971e-05	AT4G15920.1	Nodulin MtN3 family protein
1904	20	1448703	Glyma.20G015800	ELS_Q	0.2999	4.7961	1.59971e-05	AT4G14305.1	Peroxisomal membrane 22 kDa (Mpv17/PMP22) family protein
1905	20	1448703	Glyma.20G015900	ELS_Q	0.2999	4.7961	1.59971e-05	AT5G12020.1	17.6 kDa class II heat shock protein
1906	20	1448703	Glyma.20G016000	ELS_Q	0.2999	4.7961	1.59971e-05	AT1G72820.1	Mitochondrial substrate carrier family protein
1907	20	1448703	Glyma.20G016100	ELS_Q	0.2999	4.7961	1.59971e-05	AT5G16100.1
1908	20	1448703	Glyma.20G016200	ELS_Q	0.2999	4.7961	1.59971e-05	AT1G05670.1	Pentatricopeptide repeat (PPR-like) superfamily protein
1909	20	1448703	Glyma.20G016300	ELS_Q	0.2999	4.7961	1.59971e-05	AT4G12070.1
1910	20	1448703	Glyma.20G016400	ELS_Q	0.2999	4.7961	1.59971e-05	AT5G16100.1
1911	20	1448703	Glyma.20G016500	ELS_Q	0.2999	4.7961	1.59971e-05	AT5G16100.1
1912	20	1448703	Glyma.20G016600	ELS_Q	0.2999	4.7961	1.59971e-05	AT5G12040.1	Nitrilase/cyanide hydratase and apolipoprotein N-acyltransferase family protein
1913	20	1448703	Glyma.20G016700	ELS_Q	0.2999	4.7961	1.59971e-05	AT4G12070.1
1914	20	1448703	Glyma.20G016800	ELS_Q	0.2999	4.7961	1.59971e-05	AT1G15000.1	serine carboxypeptidase-like 50
1915	20	1448703	Glyma.20G016900	ELS_Q	0.2999	4.7961	1.59971e-05	AT3G54470.1	uridine 5\'-monophosphate synthase / UMP synthase (PYRE-F) (UMPS)
1916	20	1448703	Glyma.20G017000	ELS_Q	0.2999	4.7961	1.59971e-05	AT2G01460.1	P-loop containing nucleoside triphosphate hydrolases superfamily protein
1917	20	7409162	Glyma.20G041100	ELT_Q	0.7359	11.4981	3.17961e-12	AT4G13970.1	zinc ion binding
1918	20	7409162	Glyma.20G041200	ELT_Q	0.7359	11.4981	3.17961e-12	AT5G12170.2	CRT (chloroquine-resistance transporter)-like transporter 3
1919	20	7409162	Glyma.20G041300	ELT_Q	0.7359	11.4981	3.17961e-12	AT3G07040.1	NB-ARC domain-containing disease resistance protein
1920	20	7409162	Glyma.20G041400	ELT_Q	0.7359	11.4981	3.17961e-12	AT4G39080.1	vacuolar proton ATPase A3
1921	20	7409162	Glyma.20G041500	ELT_Q	0.7359	11.4981	3.17961e-12	AT5G12180.1	calcium-dependent protein kinase 17
1922	20	7409162	Glyma.20G041600	ELT_Q	0.7359	11.4981	3.17961e-12	AT1G65810.1	P-loop containing nucleoside triphosphate hydrolases superfamily protein
1923	20	7409162	Glyma.20G041700	ELT_Q	0.7359	11.4981	3.17961e-12	AT5G07990.1	Cytochrome P450 superfamily protein
1924	20	7409162	Glyma.20G041800	ELT_Q	0.7359	11.4981	3.17961e-12
1925	20	7409162	Glyma.20G041900	ELT_Q	0.7359	11.4981	3.17961e-12	AT1G26820.1	ribonuclease 3
1926	20	24425102	Glyma.20G067600	ELS_Q	0.2664	7.5718	2.68197e-08	AT4G24100.1	Protein kinase superfamily protein
1927	20	24425102	Glyma.20G067700	ELS_Q	0.2664	7.5718	2.68197e-08
1928	20	24425102	Glyma.20G067800	ELS_Q	0.2664	7.5718	2.68197e-08	AT1G11545.1	xyloglucan endotransglucosylase/hydrolase 8
1929	20	24425102	Glyma.20G067900	ELS_Q	0.2664	7.5718	2.68197e-08
[truncated: 16 more rows]

## Sheet: Table S5
Table S5 Association analysis to obtain gene epicotyl transcriptome expression
[truncated: 1,946 more rows]

[truncated: 2 more sheets: Table S6, TableS7]
